# Supplementary material for: Phenotypic and Draft Genome Sequence Analyses of a Paenibacillus sp. Isolated from the Gastrointestinal Tract of a North American Gray Wolf (Canis lupus)
Source: MDPI journal article supplement (doi:10.3390/applmicrobiol3040077), 2023-09-23
Supplement: s1 [file s1]

**A**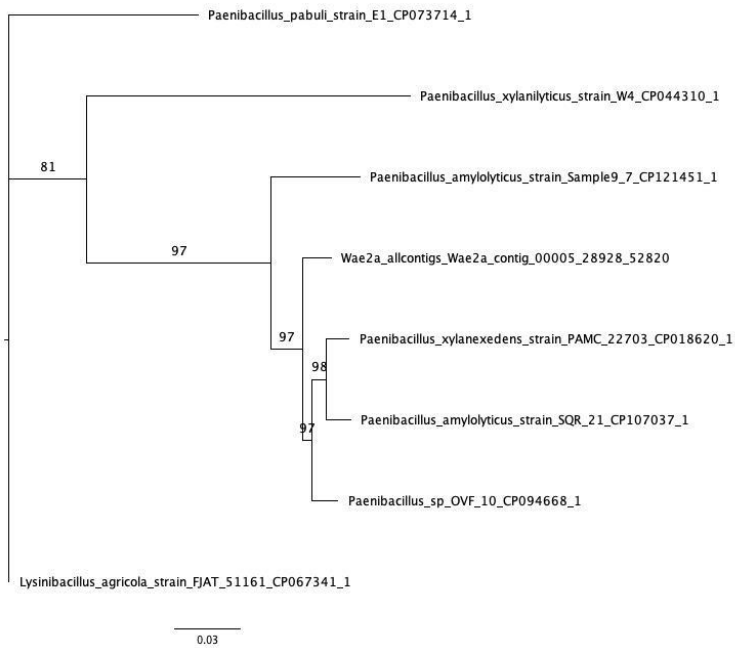**B**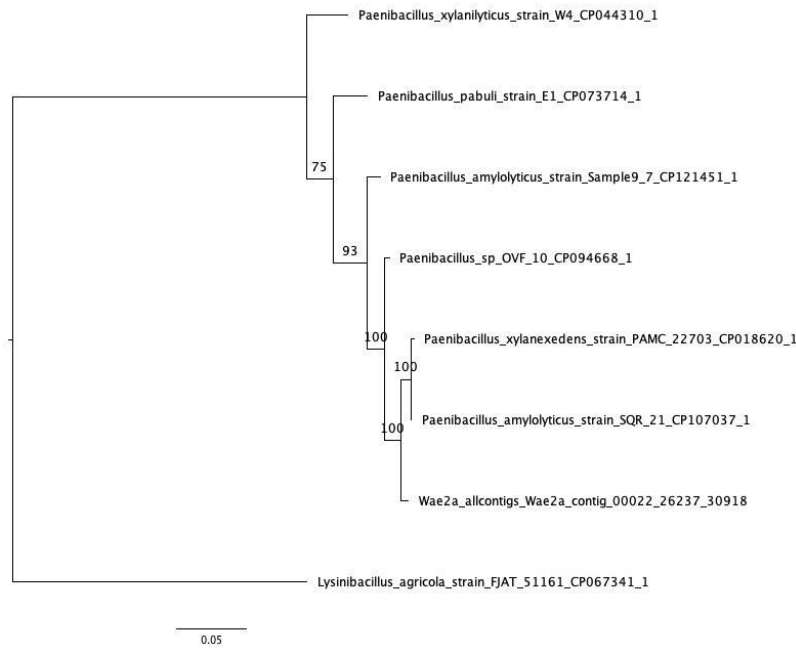**C**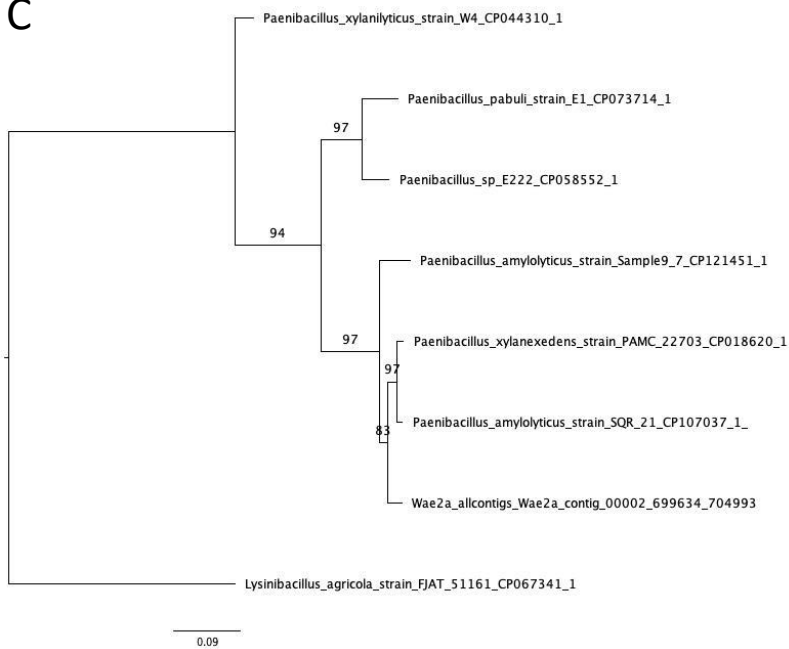**D**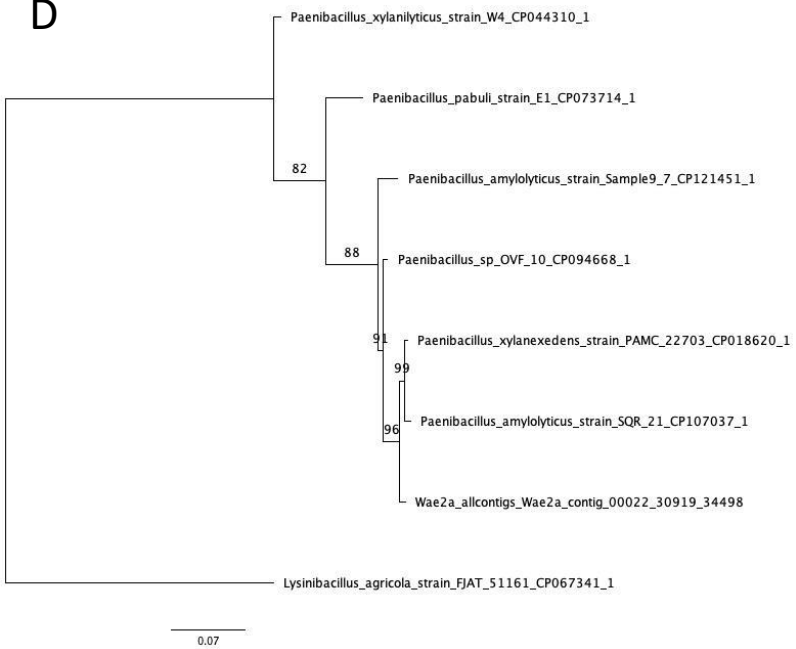

**Figure S2: Phylogenies inferred from genomic blocks.** Blocked alignments were completed for four conserved genomic blocks. (A-D). BLAST analysis was used to find seven closest relatives and an outgroup for the ClWae2A genome [1]. Taxon ID's indicate genus, species, isolate, and accession identification from NCBI. Genomic blocked alignments were created with Mugsy alignment tool [2]. RAxML was utilized to infer phylogenetic relationships with 100 bootstrap replicates [3]. Phylogenetic trees were inspected with TreeViewer [4] and figures were created and exported using FigTree [5]. Branch labels represent bootstrap support values. Scale bar represents inferred substitutions per site along branches.

1. Altschul, S.F.; Gish, W.; Miller, W.; Myers, E.W.; Lipman, D.J. Basic local alignment search tool. J. Mol. Biol. 1990, 215:403-410
2. Angiuoli, S.V.; Salzberg, S.L. Mugsy: Fast multiple alignment of closely related whole genomes. Bioinformatics. 2011, 27:334-334.
3. Stamatakis, A. RAxML version 8: a tool for phylogenetic analysis and post-analysis of large phylogenies. Bioinformatics. 2014, 30:1312–1313.
4. Bianchini, G.; Sánchez-Baracaldo, P. TreeViewer - Cross-platform software to draw phylogenetic trees (Version 2.1.0) 2023, <https://doi.org/10.5281/zenodo.7768344>
5. Rambaut, A. Figtree. v1.3.1. Institute of Evolutionary Biology, University of Edinburgh, Edinburgh. 2010, <http://tree.bio.ed.ac.uk/software/figtree/>
