# Supplementary material for: Phenotypic and Draft Genome Sequence Analyses of a Paenibacillus sp. Isolated from the Gastrointestinal Tract of a North American Gray Wolf (Canis lupus)
Source: MDPI journal article supplement (doi:10.3390/applmicrobiol3040077), 2023-09-23
Supplement: s1 [file s1]

Archive with 4 entries (4 files):
- FigureS1_PhenotypicCharacterizationsClWae2A.pdf
- FigureS2_BlockedAlignmentPhylogenies_Edited_JLB_ESF.pdf
- TableS1_Wae2a_annotationsJGI_IMG_table.xlsx
- TableS2_Functional_genes_categories_table.xlsx
