# Supplementary material for: Phenotypic and Draft Genome Sequence Analyses of a Paenibacillus sp. Isolated from the Gastrointestinal Tract of a North American Gray Wolf (Canis lupus)
Source: MDPI journal article supplement (doi:10.3390/applmicrobiol3040077), 2023-09-23
Supplement: s1 [file s1 › TableS1_Wae2a_annotationsJGI_IMG_table.xlsx]

## Sheet: Sheet1
Gene ID	Locus Tag	Gene Product Name	Genome ID	Genome Name	Batch1	Start Coord	End Coord	Is Partial Gene	Scaffold ID	COG	Pfam
8025828113	Ga0609718_13_63700_63787		8025822726	Paenibacillus sp. ClWae2A	1	63700	63787		8025822738
8025827923	Ga0609718_12_36935_37128		8025822726	Paenibacillus sp. ClWae2A	1	36935	37128		8025822737
8025828770	Ga0609718_19_18256_18471		8025822726	Paenibacillus sp. ClWae2A	1	18256	18471		8025822744
8025828633	Ga0609718_17_28720_28833		8025822726	Paenibacillus sp. ClWae2A	1	28720	28833		8025822742
8025823570	Ga0609718_01_1000829_1000982		8025822726	Paenibacillus sp. ClWae2A	1	1000829	1000982		8025822726
8025825872	Ga0609718_04_133487_133677		8025822726	Paenibacillus sp. ClWae2A	1	133487	133677		8025822729
8025826891	Ga0609718_07_105530_105705		8025822726	Paenibacillus sp. ClWae2A	1	105530	105705		8025822732
8025829054	Ga0609718_23_19251_19388		8025822726	Paenibacillus sp. ClWae2A	1	19251	19388		8025822748
8025827709	Ga0609718_10_172759_173011		8025822726	Paenibacillus sp. ClWae2A	1	172759	173011		8025822735
8025824450	Ga0609718_02_533290_533421		8025822726	Paenibacillus sp. ClWae2A	1	533290	533421		8025822727
8025827016	Ga0609718_07_232825_232934		8025822726	Paenibacillus sp. ClWae2A	1	232825	232934		8025822732
8025826978	Ga0609718_07_194291_194649		8025822726	Paenibacillus sp. ClWae2A	1	194291	194649		8025822732
8025823591	Ga0609718_01_1018867_1019062		8025822726	Paenibacillus sp. ClWae2A	1	1018867	1019062		8025822726
8025829006	Ga0609718_22_40818_40965		8025822726	Paenibacillus sp. ClWae2A	1	40818	40965		8025822747
8025823316	Ga0609718_01_729043_729140		8025822726	Paenibacillus sp. ClWae2A	1	729043	729140		8025822726
8025828078	Ga0609718_13_22827_22926		8025822726	Paenibacillus sp. ClWae2A	1	22827	22926		8025822738
8025826838	Ga0609718_07_55817_55965		8025822726	Paenibacillus sp. ClWae2A	1	55817	55965		8025822732
8025822837	Ga0609718_01_145178_145454		8025822726	Paenibacillus sp. ClWae2A	1	145178	145454		8025822726
8025823867	Ga0609718_01_1344686_1344845		8025822726	Paenibacillus sp. ClWae2A	1	1344686	1344845		8025822726
8025826200	Ga0609718_05_28148_28429		8025822726	Paenibacillus sp. ClWae2A	1	28148	28429		8025822730
8025823692	Ga0609718_01_1127686_1127914		8025822726	Paenibacillus sp. ClWae2A	1	1127686	1127914		8025822726
8025824856	Ga0609718_02_939048_939171		8025822726	Paenibacillus sp. ClWae2A	1	939048	939171		8025822727
8025826976	Ga0609718_07_193885_194223		8025822726	Paenibacillus sp. ClWae2A	1	193885	194223		8025822732
8025826767	Ga0609718_06_309569_309679		8025822726	Paenibacillus sp. ClWae2A	1	309569	309679		8025822731
8025828846	Ga0609718_20_15887_16140		8025822726	Paenibacillus sp. ClWae2A	1	15887	16140		8025822745
8025825983	Ga0609718_04_283736_283817		8025822726	Paenibacillus sp. ClWae2A	1	283736	283817		8025822729
8025826184	Ga0609718_05_11729_11813		8025822726	Paenibacillus sp. ClWae2A	1	11729	11813		8025822730
8025823170	Ga0609718_01_534717_534881		8025822726	Paenibacillus sp. ClWae2A	1	534717	534881		8025822726
8025826906	Ga0609718_07_115095_115390		8025822726	Paenibacillus sp. ClWae2A	1	115095	115390		8025822732
8025822799	Ga0609718_01_89387_89497		8025822726	Paenibacillus sp. ClWae2A	1	89387	89497		8025822726
8025824128	Ga0609718_02_178339_178514		8025822726	Paenibacillus sp. ClWae2A	1	178339	178514		8025822727
8025826412	Ga0609718_05_276876_277017		8025822726	Paenibacillus sp. ClWae2A	1	276876	277017		8025822730
8025829118	Ga0609718_24_25781_25883		8025822726	Paenibacillus sp. ClWae2A	1	25781	25883		8025822749
8025825530	Ga0609718_03_539882_540151		8025822726	Paenibacillus sp. ClWae2A	1	539882	540151		8025822728
8025828220	Ga0609718_13_176846_176970		8025822726	Paenibacillus sp. ClWae2A	1	176846	176970		8025822738
8025823938	Ga0609718_01_1406049_1406279		8025822726	Paenibacillus sp. ClWae2A	1	1406049	1406279		8025822726
8025828666	Ga0609718_17_63616_63928		8025822726	Paenibacillus sp. ClWae2A	1	63616	63928		8025822742
8025825390	Ga0609718_03_384282_384446		8025822726	Paenibacillus sp. ClWae2A	1	384282	384446		8025822728
8025824336	Ga0609718_02_385707_385801		8025822726	Paenibacillus sp. ClWae2A	1	385707	385801		8025822727
8025825083	Ga0609718_03_65972_66138		8025822726	Paenibacillus sp. ClWae2A	1	65972	66138		8025822728
8025826771	Ga0609718_06_313095_313197		8025822726	Paenibacillus sp. ClWae2A	1	313095	313197		8025822731
8025828688	Ga0609718_17_87777_87876		8025822726	Paenibacillus sp. ClWae2A	1	87777	87876		8025822742
8025828252	Ga0609718_14_28980_29092		8025822726	Paenibacillus sp. ClWae2A	1	28980	29092		8025822739
8025823843	Ga0609718_01_1320472_1320686		8025822726	Paenibacillus sp. ClWae2A	1	1320472	1320686		8025822726
8025825403	Ga0609718_03_399384_399676		8025822726	Paenibacillus sp. ClWae2A	1	399384	399676		8025822728
8025827187	Ga0609718_08_94007_94129		8025822726	Paenibacillus sp. ClWae2A	1	94007	94129		8025822733
8025822957	Ga0609718_01_289107_289207		8025822726	Paenibacillus sp. ClWae2A	1	289107	289207		8025822726
8025827569	Ga0609718_10_8248_8349		8025822726	Paenibacillus sp. ClWae2A	1	8248	8349		8025822735
8025823627	Ga0609718_01_1060537_1060646		8025822726	Paenibacillus sp. ClWae2A	1	1060537	1060646		8025822726
8025824983	Ga0609718_02_1069959_1070040		8025822726	Paenibacillus sp. ClWae2A	1	1069959	1070040		8025822727
8025829104	Ga0609718_24_10957_11176		8025822726	Paenibacillus sp. ClWae2A	1	10957	11176		8025822749
8025823952	Ga0609718_02_11737_12060	(2Fe-2S) ferredoxin	8025822726	Paenibacillus sp. ClWae2A	1	11737	12060		8025822727	COG3411===(2Fe-2S) ferredoxin	pfam01257===2Fe-2S_thioredx
8025826215	Ga0609718_05_46374_47492	(E)-4-hydroxy-3-methylbut-2-enyl-diphosphate synthase	8025822726	Paenibacillus sp. ClWae2A	1	46374	47492		8025822730	COG0821===4-hydroxy-3-methylbut-2-en-1-yl diphosphate synthase IspG/GcpE	pfam04551===GcpE
8025822747	Ga0609718_01_25750_26799	(R,R)-butanediol dehydrogenase/meso-butanediol dehydrogenase/diacetyl reductase	8025822726	Paenibacillus sp. ClWae2A	1	25750	26799		8025822726	COG1063===Threonine dehydrogenase or related Zn-dependent dehydrogenase	pfam00107===ADH_zinc_N<<>>pfam08240===ADH_N
8025822930	Ga0609718_01_258274_259305	(R,R)-butanediol dehydrogenase/meso-butanediol dehydrogenase/diacetyl reductase	8025822726	Paenibacillus sp. ClWae2A	1	258274	259305		8025822726	COG1063===Threonine dehydrogenase or related Zn-dependent dehydrogenase	pfam08240===ADH_N
8025826717	Ga0609718_06_242304_243347	(R,R)-butanediol dehydrogenase/meso-butanediol dehydrogenase/diacetyl reductase	8025822726	Paenibacillus sp. ClWae2A	1	242304	243347		8025822731	COG1063===Threonine dehydrogenase or related Zn-dependent dehydrogenase	pfam00107===ADH_zinc_N<<>>pfam08240===ADH_N
8025823513	Ga0609718_01_938046_939287	(S)-ureidoglycine-glyoxylate aminotransferase	8025822726	Paenibacillus sp. ClWae2A	1	938046	939287		8025822726	COG0075===Archaeal aspartate aminotransferase or a related aminotransferase, includes purine catabolism protein PucG	pfam00266===Aminotran_5
8025823648	Ga0609718_01_1083127_1083672	1,2-dihydroxy-3-keto-5-methylthiopentene dioxygenase	8025822726	Paenibacillus sp. ClWae2A	1	1083127	1083672		8025822726	COG1791===Acireductone dioxygenase (methionine salvage), cupin superfamily	pfam03079===ARD
8025828072	Ga0609718_13_16970_17224	1,4-alpha-glucan branching enzyme	8025822726	Paenibacillus sp. ClWae2A	1	16970	17224		8025822738	COG0296===1,4-alpha-glucan branching enzyme
8025823598	Ga0609718_01_1028107_1030113	1,4-alpha-glucan branching enzyme	8025822726	Paenibacillus sp. ClWae2A	1	1028107	1030113		8025822726	COG0296===1,4-alpha-glucan branching enzyme	pfam00128===Alpha-amylase<<>>pfam02922===CBM_48<<>>pfam02806===Alpha-amylase_C
8025826555	Ga0609718_06_53989_54831	1,4-dihydroxy-6-naphthoate synthase	8025822726	Paenibacillus sp. ClWae2A	1	53989	54831		8025822731	COG2107===Predicted periplasmic solute-binding protein	pfam02621===VitK2_biosynth
8025825964	Ga0609718_04_262665_263426	1-acyl-sn-glycerol-3-phosphate acyltransferase	8025822726	Paenibacillus sp. ClWae2A	1	262665	263426		8025822729	COG0204===1-acyl-sn-glycerol-3-phosphate acyltransferase	pfam01553===Acyltransferase
8025823925	Ga0609718_01_1396672_1397259	1-acyl-sn-glycerol-3-phosphate acyltransferase	8025822726	Paenibacillus sp. ClWae2A	1	1396672	1397259		8025822726	COG0204===1-acyl-sn-glycerol-3-phosphate acyltransferase	pfam01553===Acyltransferase
8025824244	Ga0609718_02_297365_298504	1-deoxy-D-xylulose-5-phosphate reductoisomerase	8025822726	Paenibacillus sp. ClWae2A	1	297365	298504		8025822727	COG0743===1-deoxy-D-xylulose 5-phosphate reductoisomerase	pfam02670===DXP_reductoisom<<>>pfam13288===DXPR_C<<>>pfam08436===DXP_redisom_C
8025825128	Ga0609718_03_110134_112041	1-deoxy-D-xylulose-5-phosphate synthase	8025822726	Paenibacillus sp. ClWae2A	1	110134	112041		8025822728	COG1154===Deoxyxylulose-5-phosphate synthase	pfam02780===Transketolase_C<<>>pfam02779===Transket_pyr<<>>pfam13292===DXP_synthase_N
8025824559	Ga0609718_02_638567_639478	1-phosphofructokinase	8025822726	Paenibacillus sp. ClWae2A	1	638567	639478		8025822727	COG1105===Fructose-1-phosphate kinase or kinase (PfkB)	pfam00294===PfkB
8025828946	Ga0609718_21_58043_59590	1-pyrroline-5-carboxylate dehydrogenase	8025822726	Paenibacillus sp. ClWae2A	1	58043	59590		8025822746	COG1012===Acyl-CoA reductase or other NAD-dependent aldehyde dehydrogenase	pfam00171===Aldedh
8025826171	Ga0609718_05_1_71	16S ribosomal RNA	8025822726	Paenibacillus sp. ClWae2A	1	1	71		8025822730
8025826169	Ga0609718_04_480299_480507	16S ribosomal RNA	8025822726	Paenibacillus sp. ClWae2A	1	480299	480507		8025822729
8025828849	Ga0609718_20_18303_19205	16S rRNA (adenine1518-N6/adenine1519-N6)-dimethyltransferase	8025822726	Paenibacillus sp. ClWae2A	1	18303	19205		8025822745	COG0030===16S rRNA A1518 and A1519 N6-dimethyltransferase RsmA/KsgA/DIM1 (may also have DNA glycosylase/AP lyase activity)	pfam00398===RrnaAD
8025828842	Ga0609718_20_11528_12415	16S rRNA (cytidine1402-2'-O)-methyltransferase	8025822726	Paenibacillus sp. ClWae2A	1	11528	12415		8025822745	COG0313===16S rRNA C1402 (ribose-2'-O) methylase RsmI	pfam00590===TP_methylase
8025825428	Ga0609718_03_425825_426775	16S rRNA (cytosine1402-N4)-methyltransferase	8025822726	Paenibacillus sp. ClWae2A	1	425825	426775		8025822728	COG0275===16S rRNA C1402 N4-methylase RsmH	pfam01795===Methyltransf_5
8025825272	Ga0609718_03_265492_266970	16S rRNA (cytosine967-C5)-methyltransferase	8025822726	Paenibacillus sp. ClWae2A	1	265492	266970		8025822728	COG0144===16S rRNA C967 or C1407 C5-methylase, RsmB/RsmF family	pfam01189===Methyltr_RsmB-F<<>>pfam01029===NusB<<>>pfam17125===Methyltr_RsmF_N
8025829003	Ga0609718_22_39143_39763	16S rRNA (guanine1207-N2)-methyltransferase	8025822726	Paenibacillus sp. ClWae2A	1	39143	39763		8025822747	COG2813===16S rRNA G1207 methylase RsmC	pfam05175===MTS
8025823677	Ga0609718_01_1109806_1110591	16S rRNA (guanine1516-N2)-methyltransferase	8025822726	Paenibacillus sp. ClWae2A	1	1109806	1110591		8025822726		pfam04445===SAM_MT
8025827755	Ga0609718_11_23814_24536	16S rRNA (guanine527-N7)-methyltransferase	8025822726	Paenibacillus sp. ClWae2A	1	23814	24536		8025822736	COG0357===16S rRNA G527 N7-methylase RsmG (former glucose-inhibited division protein B)	pfam02527===GidB
8025824334	Ga0609718_02_384912_385520	16S rRNA (guanine966-N2)-methyltransferase	8025822726	Paenibacillus sp. ClWae2A	1	384912	385520		8025822727	COG0742===16S rRNA G966 N2-methylase RsmD	pfam03602===Cons_hypoth95
8025825497	Ga0609718_03_505594_506358	16S rRNA (uracil1498-N3)-methyltransferase	8025822726	Paenibacillus sp. ClWae2A	1	505594	506358		8025822728	COG1385===16S rRNA U1498 N3-methylase RsmE	pfam04452===Methyltrans_RNA
8025824311	Ga0609718_02_360783_361295	16S rRNA processing protein RimM	8025822726	Paenibacillus sp. ClWae2A	1	360783	361295		8025822727	COG0806===Ribosomal 30S subunit maturation factor RimM, required for 16S rRNA processing	pfam01782===RimM<<>>pfam05239===PRC
8025824461	Ga0609718_02_541524_542270	16S rRNA pseudouridine516 synthase	8025822726	Paenibacillus sp. ClWae2A	1	541524	542270		8025822727	COG1187===16S rRNA U516 pseudouridylate synthase RsuA and related 23S rRNA U2605, pseudouridylate synthases	pfam01479===S4<<>>pfam00849===PseudoU_synth_2
8025829058	Ga0609718_23_23291_25369	1A family penicillin-binding protein	8025822726	Paenibacillus sp. ClWae2A	1	23291	25369		8025822748	COG0744===Membrane carboxypeptidase (penicillin-binding protein)	pfam00905===Transpeptidase<<>>pfam00912===Transgly
8025827559	Ga0609718_09_223800_226094	2',3'-cyclic-nucleotide 2'-phosphodiesterase/3'-nucleotidase	8025822726	Paenibacillus sp. ClWae2A	1	223800	226094		8025822734	COG0737===2',3'-cyclic-nucleotide 2'-phosphodiesterase/5'- or 3'-nucleotidase, 5'-nucleotidase family	pfam08239===SH3_3<<>>pfam00149===Metallophos<<>>pfam02872===5_nucleotid_C
8025826617	Ga0609718_06_130024_131628	2',3'-cyclic-nucleotide 2'-phosphodiesterase/3'-nucleotidase	8025822726	Paenibacillus sp. ClWae2A	1	130024	131628		8025822731	COG0737===2',3'-cyclic-nucleotide 2'-phosphodiesterase/5'- or 3'-nucleotidase, 5'-nucleotidase family	pfam00149===Metallophos<<>>pfam02872===5_nucleotid_C
8025828231	Ga0609718_14_11441_13714	2',3'-cyclic-nucleotide 2'-phosphodiesterase/3'-nucleotidase	8025822726	Paenibacillus sp. ClWae2A	1	11441	13714		8025822739	COG0737===2',3'-cyclic-nucleotide 2'-phosphodiesterase/5'- or 3'-nucleotidase, 5'-nucleotidase family	pfam01476===LysM<<>>pfam02872===5_nucleotid_C<<>>pfam00149===Metallophos
8025827028	Ga0609718_07_248212_248814	2'-5' RNA ligase	8025822726	Paenibacillus sp. ClWae2A	1	248212	248814		8025822732	COG1514===2'-5' RNA ligase	pfam13563===2_5_RNA_ligase2
8025826390	Ga0609718_05_255154_255693	2'-5' RNA ligase	8025822726	Paenibacillus sp. ClWae2A	1	255154	255693		8025822730	COG1514===2'-5' RNA ligase	pfam13563===2_5_RNA_ligase2
8025828582	Ga0609718_16_73766_74332	2,3-bisphosphoglycerate-dependent phosphoglycerate mutase	8025822726	Paenibacillus sp. ClWae2A	1	73766	74332		8025822741	COG0406===Broad specificity phosphatase PhoE	pfam00300===His_Phos_1
8025823975	Ga0609718_02_38428_39006	2,3-bisphosphoglycerate-dependent phosphoglycerate mutase	8025822726	Paenibacillus sp. ClWae2A	1	38428	39006		8025822727	COG0406===Broad specificity phosphatase PhoE	pfam00300===His_Phos_1
8025828452	Ga0609718_15_55706_56449	2,3-bisphosphoglycerate-dependent phosphoglycerate mutase	8025822726	Paenibacillus sp. ClWae2A	1	55706	56449		8025822740	COG0588===Phosphoglycerate mutase (BPG-dependent)	pfam00300===His_Phos_1
8025824931	Ga0609718_02_1021709_1022260	2,3-bisphosphoglycerate-dependent phosphoglycerate mutase	8025822726	Paenibacillus sp. ClWae2A	1	1021709	1022260		8025822727	COG0406===Broad specificity phosphatase PhoE	pfam00300===His_Phos_1
8025828003	Ga0609718_12_139758_141302	2,3-bisphosphoglycerate-independent phosphoglycerate mutase	8025822726	Paenibacillus sp. ClWae2A	1	139758	141302		8025822737	COG0696===Phosphoglycerate mutase (BPG-independent, AlkP superfamily)	pfam01676===Metalloenzyme<<>>pfam06415===iPGM_N
8025823847	Ga0609718_01_1324072_1325295	2,3-diketo-5-methylthiopentyl-1-phosphate enolase	8025822726	Paenibacillus sp. ClWae2A	1	1324072	1325295		8025822726	COG1850===Ribulose 1,5-bisphosphate carboxylase, large subunit, or a RuBisCO-like protein	pfam00016===RuBisCO_large
8025827222	Ga0609718_08_138205_139323	2,4-dienoyl-CoA reductase-like NADH-dependent reductase (Old Yellow Enzyme family)	8025822726	Paenibacillus sp. ClWae2A	1	138205	139323		8025822733	COG1902===2,4-dienoyl-CoA reductase or related NADH-dependent reductase, Old Yellow Enzyme (OYE) family	pfam00724===Oxidored_FMN
8025823365	Ga0609718_01_778925_779965	2,4-dienoyl-CoA reductase-like NADH-dependent reductase (Old Yellow Enzyme family)	8025822726	Paenibacillus sp. ClWae2A	1	778925	779965		8025822726	COG1902===2,4-dienoyl-CoA reductase or related NADH-dependent reductase, Old Yellow Enzyme (OYE) family	pfam00724===Oxidored_FMN
8025824002	Ga0609718_02_67534_68664	2,4-dienoyl-CoA reductase-like NADH-dependent reductase (Old Yellow Enzyme family)	8025822726	Paenibacillus sp. ClWae2A	1	67534	68664		8025822727	COG1902===2,4-dienoyl-CoA reductase or related NADH-dependent reductase, Old Yellow Enzyme (OYE) family	pfam00724===Oxidored_FMN
8025823322	Ga0609718_01_735024_736145	2,4-dienoyl-CoA reductase-like NADH-dependent reductase (Old Yellow Enzyme family)	8025822726	Paenibacillus sp. ClWae2A	1	735024	736145		8025822726	COG1902===2,4-dienoyl-CoA reductase or related NADH-dependent reductase, Old Yellow Enzyme (OYE) family	pfam00724===Oxidored_FMN
8025822749	Ga0609718_01_28626_29729	2,4-dienoyl-CoA reductase-like NADH-dependent reductase (Old Yellow Enzyme family)	8025822726	Paenibacillus sp. ClWae2A	1	28626	29729		8025822726	COG1902===2,4-dienoyl-CoA reductase or related NADH-dependent reductase, Old Yellow Enzyme (OYE) family	pfam00724===Oxidored_FMN
8025823699	Ga0609718_01_1134260_1135375	2,4-dienoyl-CoA reductase-like NADH-dependent reductase (Old Yellow Enzyme family)	8025822726	Paenibacillus sp. ClWae2A	1	1134260	1135375		8025822726	COG1902===2,4-dienoyl-CoA reductase or related NADH-dependent reductase, Old Yellow Enzyme (OYE) family	pfam00724===Oxidored_FMN
8025823336	Ga0609718_01_751666_752517	2,5-diketo-D-gluconate reductase A	8025822726	Paenibacillus sp. ClWae2A	1	751666	752517		8025822726	COG0656===Aldo/keto reductase, related to diketogulonate reductase	pfam00248===Aldo_ket_red
8025828891	Ga0609718_20_61382_61930	2-amino-4-hydroxy-6-hydroxymethyldihydropteridine diphosphokinase	8025822726	Paenibacillus sp. ClWae2A	1	61382	61930		8025822745	COG0801===7,8-dihydro-6-hydroxymethylpterin-pyrophosphokinase	pfam01288===HPPK
8025822967	Ga0609718_01_297248_298438	2-aminoadipate transaminase	8025822726	Paenibacillus sp. ClWae2A	1	297248	298438		8025822726	COG1167===DNA-binding transcriptional regulator, MocR family, contains an aminotransferase domain	pfam00155===Aminotran_1_2
8025824810	Ga0609718_02_886634_887857	2-aminoadipate transaminase	8025822726	Paenibacillus sp. ClWae2A	1	886634	887857		8025822727	COG1167===DNA-binding transcriptional regulator, MocR family, contains an aminotransferase domain	pfam00155===Aminotran_1_2
8025825460	Ga0609718_03_459752_460981	2-aminoadipate transaminase	8025822726	Paenibacillus sp. ClWae2A	1	459752	460981		8025822728	COG1167===DNA-binding transcriptional regulator, MocR family, contains an aminotransferase domain	pfam00155===Aminotran_1_2
8025829018	Ga0609718_22_50274_50750	2-C-methyl-D-erythritol 2,4-cyclodiphosphate synthase	8025822726	Paenibacillus sp. ClWae2A	1	50274	50750		8025822747	COG0245===2C-methyl-D-erythritol 2,4-cyclodiphosphate synthase	pfam02542===YgbB
8025829019	Ga0609718_22_50747_51442	2-C-methyl-D-erythritol 4-phosphate cytidylyltransferase	8025822726	Paenibacillus sp. ClWae2A	1	50747	51442		8025822747	COG1211===2-C-methyl-D-erythritol 4-phosphate cytidylyltransferase	pfam01128===IspD
8025828588	Ga0609718_16_77044_77235	2-C-methyl-D-erythritol 4-phosphate cytidylyltransferase	8025822726	Paenibacillus sp. ClWae2A	1	77044	77235		8025822741	COG1211===2-C-methyl-D-erythritol 4-phosphate cytidylyltransferase
8025823277	Ga0609718_01_664897_665772	2-dehydro-3-deoxy-D-arabinonate dehydratase	8025822726	Paenibacillus sp. ClWae2A	1	664897	665772		8025822726	COG3970===Fumarylacetoacetate (FAA) hydrolase family protein	pfam01557===FAA_hydrolase
8025827166	Ga0609718_08_69039_70004	2-dehydro-3-deoxygluconokinase	8025822726	Paenibacillus sp. ClWae2A	1	69039	70004		8025822733	COG0524===Sugar or nucleoside kinase, ribokinase family	pfam00294===PfkB
8025828763	Ga0609718_19_5070_5696	2-dehydro-3-deoxyphosphogluconate aldolase/(4S)-4-hydroxy-2-oxoglutarate aldolase	8025822726	Paenibacillus sp. ClWae2A	1	5070	5696		8025822744	COG0800===2-keto-3-deoxy-6-phosphogluconate aldolase	pfam01081===Aldolase
8025827474	Ga0609718_09_133635_134279	2-dehydro-3-deoxyphosphogluconate aldolase/(4S)-4-hydroxy-2-oxoglutarate aldolase	8025822726	Paenibacillus sp. ClWae2A	1	133635	134279		8025822734	COG0800===2-keto-3-deoxy-6-phosphogluconate aldolase	pfam01081===Aldolase
8025827167	Ga0609718_08_70093_70758	2-dehydro-3-deoxyphosphogluconate aldolase/(4S)-4-hydroxy-2-oxoglutarate aldolase	8025822726	Paenibacillus sp. ClWae2A	1	70093	70758		8025822733	COG0800===2-keto-3-deoxy-6-phosphogluconate aldolase	pfam01081===Aldolase
8025825437	Ga0609718_03_436668_437627	2-dehydropantoate 2-reductase	8025822726	Paenibacillus sp. ClWae2A	1	436668	437627		8025822728	COG1893===Ketopantoate reductase	pfam02558===ApbA<<>>pfam08546===ApbA_C
8025827608	Ga0609718_10_51297_52223	2-dehydropantoate 2-reductase	8025822726	Paenibacillus sp. ClWae2A	1	51297	52223		8025822735	COG1893===Ketopantoate reductase	pfam02558===ApbA
8025823168	Ga0609718_01_532690_533724	2-dehydropantoate 2-reductase	8025822726	Paenibacillus sp. ClWae2A	1	532690	533724		8025822726	COG1893===Ketopantoate reductase	pfam02558===ApbA<<>>pfam08546===ApbA_C
8025828482	Ga0609718_15_90710_91462	2-deoxy-D-gluconate 3-dehydrogenase	8025822726	Paenibacillus sp. ClWae2A	1	90710	91462		8025822740	COG1028===NAD(P)-dependent dehydrogenase, short-chain alcohol dehydrogenase family	pfam13561===adh_short_C2
8025824842	Ga0609718_02_922367_923380	2-desacetyl-2-hydroxyethyl bacteriochlorophyllide A dehydrogenase	8025822726	Paenibacillus sp. ClWae2A	1	922367	923380		8025822727	COG1063===Threonine dehydrogenase or related Zn-dependent dehydrogenase	pfam08240===ADH_N<<>>pfam00107===ADH_zinc_N
8025823848	Ga0609718_01_1325292_1325969	2-hydroxy-3-keto-5-methylthiopentenyl-1-phosphate phosphatase	8025822726	Paenibacillus sp. ClWae2A	1	1325292	1325969		8025822726	COG4359===2-hydroxy-3-keto-5-methylthiopentenyl-1-phosphate phosphatase (methionine salvage)	pfam12710===HAD
8025824554	Ga0609718_02_632259_633155	2-hydroxy-3-oxopropionate reductase	8025822726	Paenibacillus sp. ClWae2A	1	632259	633155		8025822727	COG2084===3-hydroxyisobutyrate dehydrogenase or related beta-hydroxyacid dehydrogenase	pfam03446===NAD_binding_2<<>>pfam14833===NAD_binding_11
8025822944	Ga0609718_01_272474_273457	2-hydroxy-6-oxonona-2,4-dienedioate hydrolase	8025822726	Paenibacillus sp. ClWae2A	1	272474	273457		8025822726	COG0596===Pimeloyl-ACP methyl ester carboxylesterase	pfam00561===Abhydrolase_1
8025827337	Ga0609718_08_270754_271140	2-iminobutanoate/2-iminopropanoate deaminase	8025822726	Paenibacillus sp. ClWae2A	1	270754	271140		8025822733	COG0251===Enamine deaminase RidA, house cleaning of reactive enamine intermediates, YjgF/YER057c/UK114 family	pfam01042===Ribonuc_L-PSP
8025826527	Ga0609718_06_24469_24861	2-iminobutanoate/2-iminopropanoate deaminase	8025822726	Paenibacillus sp. ClWae2A	1	24469	24861		8025822731	COG0251===Enamine deaminase RidA, house cleaning of reactive enamine intermediates, YjgF/YER057c/UK114 family	pfam01042===Ribonuc_L-PSP
8025828105	Ga0609718_13_54943_55317	2-iminobutanoate/2-iminopropanoate deaminase	8025822726	Paenibacillus sp. ClWae2A	1	54943	55317		8025822738	COG0251===Enamine deaminase RidA, house cleaning of reactive enamine intermediates, YjgF/YER057c/UK114 family	pfam01042===Ribonuc_L-PSP
8025824896	Ga0609718_02_982949_984490	2-isopropylmalate synthase	8025822726	Paenibacillus sp. ClWae2A	1	982949	984490		8025822727	COG0119===Isopropylmalate/homocitrate/citramalate synthases	pfam08502===LeuA_dimer<<>>pfam00682===HMGL-like
8025824472	Ga0609718_02_551757_553376	2-isopropylmalate synthase	8025822726	Paenibacillus sp. ClWae2A	1	551757	553376		8025822727	COG0119===Isopropylmalate/homocitrate/citramalate synthases	pfam00682===HMGL-like<<>>pfam08502===LeuA_dimer
8025826975	Ga0609718_07_191988_193547	2-isopropylmalate synthase	8025822726	Paenibacillus sp. ClWae2A	1	191988	193547		8025822732	COG0119===Isopropylmalate/homocitrate/citramalate synthases	pfam08502===LeuA_dimer<<>>pfam00682===HMGL-like
8025826686	Ga0609718_06_200426_201202	2-keto-3-deoxy-L-rhamnonate aldolase RhmA	8025822726	Paenibacillus sp. ClWae2A	1	200426	201202		8025822731	COG3836===2-keto-3-deoxy-L-rhamnonate aldolase RhmA	pfam03328===HpcH_HpaI
8025827967	Ga0609718_12_91015_92001	2-keto-3-deoxygluconate permease	8025822726	Paenibacillus sp. ClWae2A	1	91015	92001		8025822737	COG0475===Kef-type K+ transport system, membrane component KefB	pfam03812===KdgT
8025827910	Ga0609718_12_19519_20478	2-keto-3-deoxygluconate permease	8025822726	Paenibacillus sp. ClWae2A	1	19519	20478		8025822737		pfam03812===KdgT
8025823391	Ga0609718_01_807701_808711	2-keto-4-pentenoate hydratase/2-oxohepta-3-ene-1,7-dioic acid hydratase in catechol pathway	8025822726	Paenibacillus sp. ClWae2A	1	807701	808711		8025822726	COG0179===2-keto-4-pentenoate hydratase/2-oxohepta-3-ene-1,7-dioic acid hydratase (catechol pathway)	pfam01557===FAA_hydrolase
8025827288	Ga0609718_08_209759_210586	2-keto-myo-inositol isomerase	8025822726	Paenibacillus sp. ClWae2A	1	209759	210586		8025822733	COG1082===Sugar phosphate isomerase/epimerase	pfam01261===AP_endonuc_2
8025827543	Ga0609718_09_207039_207824	2-methylisocitrate lyase-like PEP mutase family enzyme	8025822726	Paenibacillus sp. ClWae2A	1	207039	207824		8025822734	COG2513===2-Methylisocitrate lyase and related enzymes, PEP mutase family	pfam13714===PEP_mutase
8025824923	Ga0609718_02_1013487_1016360	2-oxoglutarate dehydrogenase E1 component	8025822726	Paenibacillus sp. ClWae2A	1	1013487	1016360		8025822727	COG0567===2-oxoglutarate dehydrogenase complex, dehydrogenase (E1) component, and related enzymes	pfam00676===E1_dh<<>>pfam02779===Transket_pyr<<>>pfam16870===OxoGdeHyase_C
8025824922	Ga0609718_02_1012210_1013481	2-oxoglutarate dehydrogenase E2 component (dihydrolipoamide succinyltransferase)	8025822726	Paenibacillus sp. ClWae2A	1	1012210	1013481		8025822727	COG0508===Pyruvate/2-oxoglutarate dehydrogenase complex, dihydrolipoamide acyltransferase (E2) component	pfam00198===2-oxoacid_dh<<>>pfam00364===Biotin_lipoyl<<>>pfam02817===E3_binding
8025825109	Ga0609718_03_89457_90485	2-oxoisovalerate dehydrogenase E1 component alpha subunit	8025822726	Paenibacillus sp. ClWae2A	1	89457	90485		8025822728	COG1071===TPP-dependent pyruvate or acetoin dehydrogenase subunit alpha	pfam00676===E1_dh
8025825108	Ga0609718_03_88468_89454	2-oxoisovalerate dehydrogenase E1 component beta subunit	8025822726	Paenibacillus sp. ClWae2A	1	88468	89454		8025822728	COG0022===Pyruvate/2-oxoglutarate/acetoin dehydrogenase complex, dehydrogenase (E1) component	pfam02780===Transketolase_C<<>>pfam02779===Transket_pyr
8025825107	Ga0609718_03_86975_88420	2-oxoisovalerate dehydrogenase E2 component (dihydrolipoyl transacylase)	8025822726	Paenibacillus sp. ClWae2A	1	86975	88420		8025822728	COG0508===Pyruvate/2-oxoglutarate dehydrogenase complex, dihydrolipoamide acyltransferase (E2) component	pfam00364===Biotin_lipoyl<<>>pfam02817===E3_binding<<>>pfam00198===2-oxoacid_dh
8025825147	Ga0609718_03_126118_126867	2-phosphosulfolactate phosphatase	8025822726	Paenibacillus sp. ClWae2A	1	126118	126867		8025822728	COG2045===Phosphosulfolactate phosphohydrolase or related enzyme	pfam04029===2-ph_phosp
8025822965	Ga0609718_01_295194_295913	2-polyprenyl-3-methyl-5-hydroxy-6-metoxy-1,4-benzoquinol methylase	8025822726	Paenibacillus sp. ClWae2A	1	295194	295913		8025822726	COG2227===2-polyprenyl-3-methyl-5-hydroxy-6-metoxy-1,4-benzoquinol methylase	pfam13649===Methyltransf_25
8025826787	Ga0609718_07_2308_3054	2-polyprenyl-3-methyl-5-hydroxy-6-metoxy-1,4-benzoquinol methylase	8025822726	Paenibacillus sp. ClWae2A	1	2308	3054		8025822732	COG2227===2-polyprenyl-3-methyl-5-hydroxy-6-metoxy-1,4-benzoquinol methylase	pfam08241===Methyltransf_11
8025823188	Ga0609718_01_550008_550769	2-polyprenyl-3-methyl-5-hydroxy-6-metoxy-1,4-benzoquinol methylase	8025822726	Paenibacillus sp. ClWae2A	1	550008	550769		8025822726	COG2227===2-polyprenyl-3-methyl-5-hydroxy-6-metoxy-1,4-benzoquinol methylase	pfam13649===Methyltransf_25
8025823750	Ga0609718_01_1211760_1213322	2-polyprenyl-6-methoxyphenol hydroxylase-like FAD-dependent oxidoreductase	8025822726	Paenibacillus sp. ClWae2A	1	1211760	1213322		8025822726	COG0654===2-polyprenyl-6-methoxyphenol hydroxylase and related FAD-dependent oxidoreductases	pfam01494===FAD_binding_3
8025824413	Ga0609718_02_481675_482790	2-polyprenyl-6-methoxyphenol hydroxylase-like FAD-dependent oxidoreductase	8025822726	Paenibacillus sp. ClWae2A	1	481675	482790		8025822727	COG0654===2-polyprenyl-6-methoxyphenol hydroxylase and related FAD-dependent oxidoreductases	pfam01494===FAD_binding_3
8025826846	Ga0609718_07_62476_64002	2-polyprenyl-6-methoxyphenol hydroxylase-like FAD-dependent oxidoreductase	8025822726	Paenibacillus sp. ClWae2A	1	62476	64002		8025822732	COG0654===2-polyprenyl-6-methoxyphenol hydroxylase and related FAD-dependent oxidoreductases	pfam01494===FAD_binding_3
8025826505	Ga0609718_05_350130_350239	23S ribosomal RNA	8025822726	Paenibacillus sp. ClWae2A	1	350130	350239		8025822730
8025826784	Ga0609718_06_323338_323447	23S ribosomal RNA	8025822726	Paenibacillus sp. ClWae2A	1	323338	323447		8025822731
8025827501	Ga0609718_09_162904_163998	23S rRNA (adenine2503-C2)-methyltransferase	8025822726	Paenibacillus sp. ClWae2A	1	162904	163998		8025822734	COG0820===Adenine C2-methylase RlmN of 23S rRNA A2503 and tRNA A37	pfam13394===Fer4_14<<>>pfam04055===Radical_SAM
8025825271	Ga0609718_03_264197_265237	23S rRNA (adenine2503-C2)-methyltransferase	8025822726	Paenibacillus sp. ClWae2A	1	264197	265237		8025822728	COG0820===Adenine C2-methylase RlmN of 23S rRNA A2503 and tRNA A37	pfam04055===Radical_SAM<<>>pfam13394===Fer4_14
8025825127	Ga0609718_03_109266_110111	23S rRNA (cytidine1920-2'-O)/16S rRNA (cytidine1409-2'-O)-methyltransferase	8025822726	Paenibacillus sp. ClWae2A	1	109266	110111		8025822728	COG1189===Predicted rRNA methylase YqxC, contains S4 and FtsJ domains	pfam01479===S4<<>>pfam01728===FtsJ
8025823639	Ga0609718_01_1073150_1074199	23S rRNA (cytidine2498-2'-O)-methyltransferase	8025822726	Paenibacillus sp. ClWae2A	1	1073150	1074199		8025822726	COG2933===23S rRNA C2498 (ribose-2'-O)-methylase RlmM	pfam01728===FtsJ
8025825493	Ga0609718_03_500928_502304	23S rRNA (cytosine1962-C5)-methyltransferase	8025822726	Paenibacillus sp. ClWae2A	1	500928	502304		8025822728	COG1092===23S rRNA G2069 N7-methylase RlmK or C1962 C5-methylase RlmI	pfam13847===Methyltransf_31<<>>pfam17785===PUA_3
8025823805	Ga0609718_01_1268925_1269788	23S rRNA (cytosine1962-C5)-methyltransferase	8025822726	Paenibacillus sp. ClWae2A	1	1268925	1269788		8025822726	COG1092===23S rRNA G2069 N7-methylase RlmK or C1962 C5-methylase RlmI	pfam10672===Methyltrans_SAM
8025827218	Ga0609718_08_134010_134759	23S rRNA (guanine745-N1)-methyltransferase	8025822726	Paenibacillus sp. ClWae2A	1	134010	134759		8025822733	COG0500===SAM-dependent methyltransferase	pfam13649===Methyltransf_25
8025829013	Ga0609718_22_44876_45622	23S rRNA (guanosine2251-2'-O)-methyltransferase	8025822726	Paenibacillus sp. ClWae2A	1	44876	45622		8025822747	COG0566===tRNA G18 (ribose-2'-O)-methylase SpoU	pfam08032===SpoU_sub_bind<<>>pfam00588===SpoU_methylase
8025823883	Ga0609718_01_1358631_1359104	23S rRNA (pseudouridine1915-N3)-methyltransferase	8025822726	Paenibacillus sp. ClWae2A	1	1358631	1359104		8025822726		pfam10673===DUF2487
8025827801	Ga0609718_11_71246_71725	23S rRNA (pseudouridine1915-N3)-methyltransferase	8025822726	Paenibacillus sp. ClWae2A	1	71246	71725		8025822736	COG1576===23S rRNA pseudoU1915 N3-methylase RlmH	pfam02590===SPOUT_MTase
8025827612	Ga0609718_10_55552_57366	23S rRNA (uracil1939-C5)-methyltransferase	8025822726	Paenibacillus sp. ClWae2A	1	55552	57366		8025822735	COG2265===tRNA/tmRNA/rRNA uracil-C5-methylase, TrmA/RlmC/RlmD family	pfam01938===TRAM<<>>pfam05958===tRNA_U5-meth_tr
8025824873	Ga0609718_02_952814_953050	23S rRNA maturation mini-RNase III	8025822726	Paenibacillus sp. ClWae2A	1	952814	953050		8025822727	COG1939===23S rRNA maturation mini-RNase III
8025826202	Ga0609718_05_30512_31435	23S rRNA pseudouridine1911/1915/1917 synthase	8025822726	Paenibacillus sp. ClWae2A	1	30512	31435		8025822730	COG0564===Pseudouridylate synthase, 23S rRNA- or tRNA-specific	pfam00849===PseudoU_synth_2
8025824864	Ga0609718_02_946394_947377	23S rRNA pseudouridine1911/1915/1917 synthase	8025822726	Paenibacillus sp. ClWae2A	1	946394	947377		8025822727	COG0564===Pseudouridylate synthase, 23S rRNA- or tRNA-specific	pfam00849===PseudoU_synth_2
8025823806	Ga0609718_01_1269791_1270522	23S rRNA pseudouridine1911/1915/1917 synthase	8025822726	Paenibacillus sp. ClWae2A	1	1269791	1270522		8025822726	COG0564===Pseudouridylate synthase, 23S rRNA- or tRNA-specific	pfam00849===PseudoU_synth_2
8025825398	Ga0609718_03_392809_393822	23S rRNA pseudouridine1911/1915/1917 synthase	8025822726	Paenibacillus sp. ClWae2A	1	392809	393822		8025822728	COG0564===Pseudouridylate synthase, 23S rRNA- or tRNA-specific	pfam00849===PseudoU_synth_2<<>>pfam01479===S4
8025826793	Ga0609718_07_8054_9202	23S rRNA pseudouridine1911/1915/1917 synthase	8025822726	Paenibacillus sp. ClWae2A	1	8054	9202		8025822732	COG0564===Pseudouridylate synthase, 23S rRNA- or tRNA-specific	pfam00849===PseudoU_synth_2
8025823702	Ga0609718_01_1137451_1138152	23S rRNA pseudouridine2604 synthase	8025822726	Paenibacillus sp. ClWae2A	1	1137451	1138152		8025822726	COG1187===16S rRNA U516 pseudouridylate synthase RsuA and related 23S rRNA U2605, pseudouridylate synthases	pfam00849===PseudoU_synth_2<<>>pfam01479===S4
8025829044	Ga0609718_23_12716_13417	23S rRNA pseudouridine2604 synthase	8025822726	Paenibacillus sp. ClWae2A	1	12716	13417		8025822748	COG1187===16S rRNA U516 pseudouridylate synthase RsuA and related 23S rRNA U2605, pseudouridylate synthases	pfam00849===PseudoU_synth_2<<>>pfam01479===S4
8025825029	Ga0609718_03_9419_10177	23S rRNA pseudouridine2605 synthase	8025822726	Paenibacillus sp. ClWae2A	1	9419	10177		8025822728	COG1187===16S rRNA U516 pseudouridylate synthase RsuA and related 23S rRNA U2605, pseudouridylate synthases	pfam00849===PseudoU_synth_2<<>>pfam01479===S4
8025825079	Ga0609718_03_62551_63783	3,4-dihydroxy 2-butanone 4-phosphate synthase/GTP cyclohydrolase II	8025822726	Paenibacillus sp. ClWae2A	1	62551	63783		8025822728	COG0807===GTP cyclohydrolase II<<>>COG0108===3,4-dihydroxy-2-butanone 4-phosphate synthase	pfam00925===GTP_cyclohydro2<<>>pfam00926===DHBP_synthase
8025825151	Ga0609718_03_130360_130803	3-dehydroquinate dehydratase-2	8025822726	Paenibacillus sp. ClWae2A	1	130360	130803		8025822728	COG0757===3-dehydroquinate dehydratase	pfam01220===DHquinase_II
8025823899	Ga0609718_01_1373520_1374614	3-dehydroquinate synthase	8025822726	Paenibacillus sp. ClWae2A	1	1373520	1374614		8025822726	COG0337===3-dehydroquinate synthetase	pfam01761===DHQ_synthase
8025824826	Ga0609718_02_904373_905437	3-deoxy-7-phosphoheptulonate synthase	8025822726	Paenibacillus sp. ClWae2A	1	904373	905437		8025822727	COG2876===3-deoxy-D-arabino-heptulosonate 7-phosphate (DAHP) synthase	pfam18152===DAHP_snth_FXD<<>>pfam00793===DAHP_synth_1
8025823996	Ga0609718_02_62291_62926	3-hexulose-6-phosphate synthase	8025822726	Paenibacillus sp. ClWae2A	1	62291	62926		8025822727	COG0269===3-keto-L-gulonate-6-phosphate decarboxylase	pfam00215===OMPdecase
8025826007	Ga0609718_04_306228_306659	3-hydroxyacyl-[acyl-carrier-protein] dehydratase	8025822726	Paenibacillus sp. ClWae2A	1	306228	306659		8025822729	COG0764===3-hydroxymyristoyl/3-hydroxydecanoyl-(acyl carrier protein) dehydratase	pfam07977===FabA
8025823197	Ga0609718_01_560845_561273	3-hydroxyacyl-[acyl-carrier-protein] dehydratase	8025822726	Paenibacillus sp. ClWae2A	1	560845	561273		8025822726	COG0764===3-hydroxymyristoyl/3-hydroxydecanoyl-(acyl carrier protein) dehydratase	pfam07977===FabA
8025823856	Ga0609718_01_1332623_1333495	3-hydroxybutyryl-CoA dehydrogenase	8025822726	Paenibacillus sp. ClWae2A	1	1332623	1333495		8025822726	COG1250===3-hydroxyacyl-CoA dehydrogenase	pfam02737===3HCDH_N<<>>pfam00725===3HCDH
8025826641	Ga0609718_06_155170_156063	3-hydroxyisobutyrate dehydrogenase	8025822726	Paenibacillus sp. ClWae2A	1	155170	156063		8025822731	COG2084===3-hydroxyisobutyrate dehydrogenase or related beta-hydroxyacid dehydrogenase	pfam14833===NAD_binding_11<<>>pfam03446===NAD_binding_2
8025824894	Ga0609718_02_980385_981470	3-isopropylmalate dehydrogenase	8025822726	Paenibacillus sp. ClWae2A	1	980385	981470		8025822727	COG0473===Isocitrate/isopropylmalate dehydrogenase	pfam00180===Iso_dh
8025823832	Ga0609718_01_1305604_1307025	3-isopropylmalate/(R)-2-methylmalate dehydratase large subunit	8025822726	Paenibacillus sp. ClWae2A	1	1305604	1307025		8025822726	COG0065===Homoaconitase/3-isopropylmalate dehydratase large subunit	pfam00330===Aconitase
8025823831	Ga0609718_01_1304970_1305572	3-isopropylmalate/(R)-2-methylmalate dehydratase small subunit	8025822726	Paenibacillus sp. ClWae2A	1	1304970	1305572		8025822726	COG0066===3-isopropylmalate dehydratase small subunit	pfam00694===Aconitase_C
8025823866	Ga0609718_01_1343700_1344578	3-methyl-2-oxobutanoate hydroxymethyltransferase	8025822726	Paenibacillus sp. ClWae2A	1	1343700	1344578		8025822726	COG0413===Ketopantoate hydroxymethyltransferase	pfam02548===Pantoate_transf
8025827603	Ga0609718_10_47024_48112	3-methyladenine DNA glycosylase AlkC	8025822726	Paenibacillus sp. ClWae2A	1	47024	48112		8025822735	COG4335===3-methyladenine DNA glycosylase AlkC	pfam08713===DNA_alkylation
8025825780	Ga0609718_04_33390_34229	3-methyladenine DNA glycosylase AlkC	8025822726	Paenibacillus sp. ClWae2A	1	33390	34229		8025822729	COG4335===3-methyladenine DNA glycosylase AlkC	pfam08713===DNA_alkylation
8025827650	Ga0609718_10_102124_102831	3-methyladenine DNA glycosylase AlkD	8025822726	Paenibacillus sp. ClWae2A	1	102124	102831		8025822735	COG4912===3-methyladenine DNA glycosylase AlkD	pfam08713===DNA_alkylation
8025827244	Ga0609718_08_163611_164438	3-methyladenine DNA glycosylase AlkD	8025822726	Paenibacillus sp. ClWae2A	1	163611	164438		8025822733	COG4912===3-methyladenine DNA glycosylase AlkD	pfam08713===DNA_alkylation
8025825921	Ga0609718_04_210291_211079	3-oxoacyl-[acyl-carrier protein] reductase	8025822726	Paenibacillus sp. ClWae2A	1	210291	211079		8025822729	COG1028===NAD(P)-dependent dehydrogenase, short-chain alcohol dehydrogenase family	pfam13561===adh_short_C2
8025824214	Ga0609718_02_260662_261432	3-oxoacyl-[acyl-carrier protein] reductase	8025822726	Paenibacillus sp. ClWae2A	1	260662	261432		8025822727	COG1028===NAD(P)-dependent dehydrogenase, short-chain alcohol dehydrogenase family	pfam13561===adh_short_C2
8025827684	Ga0609718_10_148035_148778	3-oxoacyl-[acyl-carrier protein] reductase	8025822726	Paenibacillus sp. ClWae2A	1	148035	148778		8025822735	COG1028===NAD(P)-dependent dehydrogenase, short-chain alcohol dehydrogenase family	pfam13561===adh_short_C2
8025826407	Ga0609718_05_272380_273159	3-oxoacyl-[acyl-carrier protein] reductase	8025822726	Paenibacillus sp. ClWae2A	1	272380	273159		8025822730	COG1028===NAD(P)-dependent dehydrogenase, short-chain alcohol dehydrogenase family	pfam13561===adh_short_C2
8025827139	Ga0609718_08_39928_40671	3-oxoacyl-[acyl-carrier protein] reductase	8025822726	Paenibacillus sp. ClWae2A	1	39928	40671		8025822733	COG1028===NAD(P)-dependent dehydrogenase, short-chain alcohol dehydrogenase family	pfam00106===adh_short
8025822987	Ga0609718_01_316863_317657	3-oxoacyl-[acyl-carrier protein] reductase	8025822726	Paenibacillus sp. ClWae2A	1	316863	317657		8025822726	COG1028===NAD(P)-dependent dehydrogenase, short-chain alcohol dehydrogenase family	pfam00106===adh_short
8025823447	Ga0609718_01_863800_864561	3-oxoacyl-[acyl-carrier protein] reductase	8025822726	Paenibacillus sp. ClWae2A	1	863800	864561		8025822726	COG1028===NAD(P)-dependent dehydrogenase, short-chain alcohol dehydrogenase family	pfam13561===adh_short_C2
8025823360	Ga0609718_01_774846_775637	3-oxoacyl-[acyl-carrier protein] reductase	8025822726	Paenibacillus sp. ClWae2A	1	774846	775637		8025822726	COG1028===NAD(P)-dependent dehydrogenase, short-chain alcohol dehydrogenase family	pfam13561===adh_short_C2
8025824322	Ga0609718_02_372646_373395	3-oxoacyl-[acyl-carrier protein] reductase	8025822726	Paenibacillus sp. ClWae2A	1	372646	373395		8025822727	COG1028===NAD(P)-dependent dehydrogenase, short-chain alcohol dehydrogenase family	pfam13561===adh_short_C2
8025825847	Ga0609718_04_105681_106400	3-oxoacyl-[acyl-carrier protein] reductase	8025822726	Paenibacillus sp. ClWae2A	1	105681	106400		8025822729	COG0300===Short-chain dehydrogenase	pfam00106===adh_short
8025827682	Ga0609718_10_145236_147695	3-oxoacyl-[acyl-carrier-protein] synthase II	8025822726	Paenibacillus sp. ClWae2A	1	145236	147695		8025822735	COG0304===3-oxoacyl-(acyl-carrier-protein) synthase	pfam02801===Ketoacyl-synt_C<<>>pfam00109===ketoacyl-synt
8025824320	Ga0609718_02_370844_372082	3-oxoacyl-[acyl-carrier-protein] synthase II	8025822726	Paenibacillus sp. ClWae2A	1	370844	372082		8025822727	COG0304===3-oxoacyl-(acyl-carrier-protein) synthase	pfam02801===Ketoacyl-synt_C<<>>pfam00109===ketoacyl-synt
8025826754	Ga0609718_06_292280_293518	3-oxoacyl-[acyl-carrier-protein] synthase II	8025822726	Paenibacillus sp. ClWae2A	1	292280	293518		8025822731	COG0304===3-oxoacyl-(acyl-carrier-protein) synthase	pfam00109===ketoacyl-synt<<>>pfam02801===Ketoacyl-synt_C
8025827563	Ga0609718_10_1114_2118	3-oxoacyl-[acyl-carrier-protein] synthase-3	8025822726	Paenibacillus sp. ClWae2A	1	1114	2118		8025822735	COG0332===3-oxoacyl-[acyl-carrier-protein] synthase III	pfam08545===ACP_syn_III<<>>pfam08541===ACP_syn_III_C
8025828140	Ga0609718_13_91777_92787	3-oxoacyl-[acyl-carrier-protein] synthase-3	8025822726	Paenibacillus sp. ClWae2A	1	91777	92787		8025822738	COG0332===3-oxoacyl-[acyl-carrier-protein] synthase III	pfam08541===ACP_syn_III_C
8025828135	Ga0609718_13_87029_87985	3-oxoacyl-[acyl-carrier-protein] synthase-3	8025822726	Paenibacillus sp. ClWae2A	1	87029	87985		8025822738	COG0332===3-oxoacyl-[acyl-carrier-protein] synthase III	pfam08541===ACP_syn_III_C<<>>pfam08545===ACP_syn_III
8025824324	Ga0609718_02_374573_375562	3-oxoacyl-[acyl-carrier-protein] synthase-3	8025822726	Paenibacillus sp. ClWae2A	1	374573	375562		8025822727	COG0332===3-oxoacyl-[acyl-carrier-protein] synthase III	pfam08541===ACP_syn_III_C<<>>pfam08545===ACP_syn_III
8025824641	Ga0609718_02_743283_744275	3-oxoacyl-[acyl-carrier-protein] synthase-3	8025822726	Paenibacillus sp. ClWae2A	1	743283	744275		8025822727	COG0332===3-oxoacyl-[acyl-carrier-protein] synthase III	pfam08541===ACP_syn_III_C<<>>pfam08545===ACP_syn_III
8025824945	Ga0609718_02_1033160_1034161	3-oxoacyl-[acyl-carrier-protein] synthase-3	8025822726	Paenibacillus sp. ClWae2A	1	1033160	1034161		8025822727	COG0332===3-oxoacyl-[acyl-carrier-protein] synthase III	pfam08541===ACP_syn_III_C<<>>pfam08545===ACP_syn_III
8025828804	Ga0609718_19_50837_51628	3-oxoadipate enol-lactonase	8025822726	Paenibacillus sp. ClWae2A	1	50837	51628		8025822744	COG0596===Pimeloyl-ACP methyl ester carboxylesterase	pfam00561===Abhydrolase_1
8025825316	Ga0609718_03_318771_320066	3-phosphoshikimate 1-carboxyvinyltransferase	8025822726	Paenibacillus sp. ClWae2A	1	318771	320066		8025822728	COG0128===5-enolpyruvylshikimate-3-phosphate synthase	pfam00275===EPSP_synthase
8025823590	Ga0609718_01_1018193_1018864	3D (Asp-Asp-Asp) domain-containing protein	8025822726	Paenibacillus sp. ClWae2A	1	1018193	1018864		8025822726	COG3584===3D (Asp-Asp-Asp) domain	pfam06725===3D<<>>pfam01476===LysM
8025824835	Ga0609718_02_914151_914942	3D (Asp-Asp-Asp) domain-containing protein	8025822726	Paenibacillus sp. ClWae2A	1	914151	914942		8025822727	COG3584===3D (Asp-Asp-Asp) domain	pfam06725===3D
8025829148	Ga0609718_25_1385_3250	3D-(3,5/4)-trihydroxycyclohexane-1,2-dione acylhydrolase (decyclizing)	8025822726	Paenibacillus sp. ClWae2A	1	1385	3250		8025822750	COG3962===TPP-dependent trihydroxycyclohexane-1,2-dione (THcHDO) dehydratase, myo-inositol metabolism	pfam02776===TPP_enzyme_N<<>>pfam02775===TPP_enzyme_C<<>>pfam00205===TPP_enzyme_M
8025828126	Ga0609718_13_77192_77998	4'-phosphopantetheinyl transferase	8025822726	Paenibacillus sp. ClWae2A	1	77192	77998		8025822738	COG2091===Phosphopantetheinyl transferase	pfam01648===ACPS
8025827505	Ga0609718_09_167615_168301	4'-phosphopantetheinyl transferase	8025822726	Paenibacillus sp. ClWae2A	1	167615	168301		8025822734	COG2091===Phosphopantetheinyl transferase	pfam01648===ACPS
8025825843	Ga0609718_04_102742_103512	4,5-DOPA dioxygenase extradiol	8025822726	Paenibacillus sp. ClWae2A	1	102742	103512		8025822729	COG3384===Aromatic ring-opening dioxygenase, catalytic subunit, LigB family	pfam02900===LigB
8025827596	Ga0609718_10_40297_41082	4,5-DOPA dioxygenase extradiol	8025822726	Paenibacillus sp. ClWae2A	1	40297	41082		8025822735	COG3384===Aromatic ring-opening dioxygenase, catalytic subunit, LigB family	pfam02900===LigB
8025822832	Ga0609718_01_139446_141638	4-amino-4-deoxy-L-arabinose transferase-like glycosyltransferase	8025822726	Paenibacillus sp. ClWae2A	1	139446	141638		8025822726	COG1807===4-amino-4-deoxy-L-arabinose transferase or related glycosyltransferase of PMT family	pfam13231===PMT_2
8025828888	Ga0609718_20_59148_60032	4-amino-4-deoxychorismate lyase	8025822726	Paenibacillus sp. ClWae2A	1	59148	60032		8025822745	COG0115===Branched-chain amino acid aminotransferase/4-amino-4-deoxychorismate lyase	pfam01063===Aminotran_4
8025823705	Ga0609718_01_1140632_1141870	4-aminobutyrate aminotransferase-like enzyme	8025822726	Paenibacillus sp. ClWae2A	1	1140632	1141870		8025822726	COG0160===4-aminobutyrate aminotransferase or related aminotransferase	pfam00202===Aminotran_3
8025828353	Ga0609718_14_131964_132770	4-azaleucine resistance transporter AzlC	8025822726	Paenibacillus sp. ClWae2A	1	131964	132770		8025822739	COG1296===Predicted branched-chain amino acid permease (azaleucine resistance)	pfam03591===AzlC
8025824639	Ga0609718_02_742322_742690	4-carboxymuconolactone decarboxylase	8025822726	Paenibacillus sp. ClWae2A	1	742322	742690		8025822727	COG0599===Uncharacterized conserved protein YurZ, alkylhydroperoxidase/carboxymuconolactone decarboxylase family	pfam02627===CMD
8025828480	Ga0609718_15_88947_89786	4-deoxy-L-threo-5-hexosulose-uronate ketol-isomerase	8025822726	Paenibacillus sp. ClWae2A	1	88947	89786		8025822740	COG3717===5-keto 4-deoxyuronate isomerase	pfam04962===KduI
8025828853	Ga0609718_20_21166_22020	4-diphosphocytidyl-2-C-methyl-D-erythritol kinase	8025822726	Paenibacillus sp. ClWae2A	1	21166	22020		8025822745	COG1947===4-diphosphocytidyl-2C-methyl-D-erythritol kinase	pfam00288===GHMP_kinases_N<<>>pfam08544===GHMP_kinases_C
8025824887	Ga0609718_02_972684_973640	4-hydroxy 2-oxovalerate aldolase	8025822726	Paenibacillus sp. ClWae2A	1	972684	973640		8025822727	COG0119===Isopropylmalate/homocitrate/citramalate synthases	pfam00682===HMGL-like
8025824827	Ga0609718_02_905726_906808	4-hydroxy-3-methylbut-2-enyl diphosphate reductase	8025822726	Paenibacillus sp. ClWae2A	1	905726	906808		8025822727	COG0761===4-Hydroxy-3-methylbut-2-enyl diphosphate reductase IspH	pfam02401===LYTB
8025822739	Ga0609718_01_17044_18879	4-hydroxy-3-polyprenylbenzoate decarboxylase	8025822726	Paenibacillus sp. ClWae2A	1	17044	18879		8025822726	COG0043===3-polyprenyl-4-hydroxybenzoate decarboxylase	pfam01977===UbiD
8025823904	Ga0609718_01_1378701_1379321	4-hydroxy-3-polyprenylbenzoate decarboxylase	8025822726	Paenibacillus sp. ClWae2A	1	1378701	1379321		8025822726	COG0163===3-polyprenyl-4-hydroxybenzoate decarboxylase	pfam02441===Flavoprotein
8025823873	Ga0609718_01_1349655_1350458	4-hydroxy-tetrahydrodipicolinate reductase	8025822726	Paenibacillus sp. ClWae2A	1	1349655	1350458		8025822726	COG0289===Dihydrodipicolinate reductase	pfam01113===DapB_N<<>>pfam05173===DapB_C
8025824222	Ga0609718_02_271361_272239	4-hydroxy-tetrahydrodipicolinate synthase	8025822726	Paenibacillus sp. ClWae2A	1	271361	272239		8025822727	COG0329===Dihydrodipicolinate synthase/N-acetylneuraminate lyase	pfam00701===DHDPS
8025823905	Ga0609718_01_1379322_1380188	4-hydroxybenzoate polyprenyltransferase	8025822726	Paenibacillus sp. ClWae2A	1	1379322	1380188		8025822726	COG0382===4-hydroxybenzoate polyprenyltransferase	pfam01040===UbiA
8025825396	Ga0609718_03_390351_391265	4-hydroxybenzoate polyprenyltransferase	8025822726	Paenibacillus sp. ClWae2A	1	390351	391265		8025822728	COG0382===4-hydroxybenzoate polyprenyltransferase	pfam01040===UbiA
8025823801	Ga0609718_01_1265282_1266739	4-hydroxyphenylacetate 3-monooxygenase	8025822726	Paenibacillus sp. ClWae2A	1	1265282	1266739		8025822726	COG2368===Aromatic ring hydroxylase	pfam11794===HpaB_N<<>>pfam03241===HpaB
8025822755	Ga0609718_01_36384_37829	4-hydroxyphenylacetate 3-monooxygenase	8025822726	Paenibacillus sp. ClWae2A	1	36384	37829		8025822726	COG2368===Aromatic ring hydroxylase	pfam11794===HpaB_N<<>>pfam03241===HpaB
8025827969	Ga0609718_12_93388_94389	4-hydroxythreonine-4-phosphate dehydrogenase	8025822726	Paenibacillus sp. ClWae2A	1	93388	94389		8025822737	COG1995===4-hydroxy-L-threonine phosphate dehydrogenase PdxA	pfam04166===PdxA
8025823645	Ga0609718_01_1077323_1078132	4-nitrophenyl phosphatase	8025822726	Paenibacillus sp. ClWae2A	1	1077323	1078132		8025822726	COG0647===Ribonucleotide monophosphatase NagD, HAD superfamily	pfam13344===Hydrolase_6<<>>pfam13242===Hydrolase_like
8025827409	Ga0609718_09_58201_59385	4-O-beta-D-mannosyl-D-glucose phosphorylase	8025822726	Paenibacillus sp. ClWae2A	1	58201	59385		8025822734	COG2152===Predicted glycosyl hydrolase, GH43/DUF377 family	pfam04041===Glyco_hydro_130
8025827441	Ga0609718_09_97307_97525	4-oxalocrotonate tautomerase	8025822726	Paenibacillus sp. ClWae2A	1	97307	97525		8025822734	COG1942===Phenylpyruvate tautomerase PptA, 4-oxalocrotonate tautomerase family	pfam01361===Tautomerase
8025829049	Ga0609718_23_16023_16319	4a-hydroxytetrahydrobiopterin dehydratase	8025822726	Paenibacillus sp. ClWae2A	1	16023	16319		8025822748	COG2154===Pterin-4a-carbinolamine dehydratase	pfam01329===Pterin_4a
8025823729	Ga0609718_01_1187673_1188239	5'(3')-deoxyribonucleotidase	8025822726	Paenibacillus sp. ClWae2A	1	1187673	1188239		8025822726	COG4502===5'(3')-deoxyribonucleotidase	pfam06941===NT5C
8025824862	Ga0609718_02_944590_945483	5'-3' exonuclease	8025822726	Paenibacillus sp. ClWae2A	1	944590	945483		8025822727	COG0258===5'-3' exonuclease	pfam01367===5_3_exonuc<<>>pfam02739===5_3_exonuc_N
8025827815	Ga0609718_11_85814_87937	5'-nucleotidase	8025822726	Paenibacillus sp. ClWae2A	1	85814	87937		8025822736	COG0737===2',3'-cyclic-nucleotide 2'-phosphodiesterase/5'- or 3'-nucleotidase, 5'-nucleotidase family	pfam02872===5_nucleotid_C<<>>pfam00149===Metallophos<<>>pfam00395===SLH
8025824741	Ga0609718_02_803282_804712	5'-nucleotidase	8025822726	Paenibacillus sp. ClWae2A	1	803282	804712		8025822727	COG0737===2',3'-cyclic-nucleotide 2'-phosphodiesterase/5'- or 3'-nucleotidase, 5'-nucleotidase family	pfam02872===5_nucleotid_C<<>>pfam00149===Metallophos
8025827083	Ga0609718_07_304190_305989	5'-nucleotidase/UDP-sugar diphosphatase	8025822726	Paenibacillus sp. ClWae2A	1	304190	305989		8025822732	COG0737===2',3'-cyclic-nucleotide 2'-phosphodiesterase/5'- or 3'-nucleotidase, 5'-nucleotidase family	pfam01476===LysM<<>>pfam00149===Metallophos<<>>pfam02872===5_nucleotid_C
8025824847	Ga0609718_02_927069_928577	5'-nucleotidase/UDP-sugar diphosphatase	8025822726	Paenibacillus sp. ClWae2A	1	927069	928577		8025822727	COG0737===2',3'-cyclic-nucleotide 2'-phosphodiesterase/5'- or 3'-nucleotidase, 5'-nucleotidase family	pfam02872===5_nucleotid_C<<>>pfam00149===Metallophos
8025829034	Ga0609718_23_3978_4568	5'-phosphate synthase pdxT subunit	8025822726	Paenibacillus sp. ClWae2A	1	3978	4568		8025822748	COG0311===Glutamine amidotransferase PdxT (pyridoxal biosynthesis)	pfam01174===SNO
8025827570	Ga0609718_10_8544_9029	5-(carboxyamino)imidazole ribonucleotide mutase	8025822726	Paenibacillus sp. ClWae2A	1	8544	9029		8025822735	COG0041===Phosphoribosylcarboxyaminoimidazole (NCAIR) mutase	pfam00731===AIRC
8025827571	Ga0609718_10_9026_10228	5-(carboxyamino)imidazole ribonucleotide synthase	8025822726	Paenibacillus sp. ClWae2A	1	9026	10228		8025822735	COG0026===Phosphoribosylaminoimidazole carboxylase (NCAIR synthetase)	pfam02222===ATP-grasp<<>>pfam17769===PurK_C
8025829150	Ga0609718_25_4406_5416	5-dehydro-2-deoxygluconokinase	8025822726	Paenibacillus sp. ClWae2A	1	4406	5416		8025822750	COG0524===Sugar or nucleoside kinase, ribokinase family	pfam00294===PfkB
8025829153	Ga0609718_25_8224_9030	5-deoxy-glucuronate isomerase	8025822726	Paenibacillus sp. ClWae2A	1	8224	9030		8025822750	COG3718===5-deoxy-D-glucuronate isomerase	pfam04962===KduI
8025826973	Ga0609718_07_188460_189098	5-formyltetrahydrofolate cyclo-ligase	8025822726	Paenibacillus sp. ClWae2A	1	188460	189098		8025822732	COG0212===5-formyltetrahydrofolate cyclo-ligase	pfam01812===5-FTHF_cyc-lig
8025823516	Ga0609718_01_942045_942422	5-hydroxyisourate hydrolase	8025822726	Paenibacillus sp. ClWae2A	1	942045	942422		8025822726	COG2351===5-hydroxyisourate hydrolase (purine catabolism), transthyretin-related family	pfam00576===Transthyretin
8025823583	Ga0609718_01_1013820_1014110	5-methylcytosine-specific restriction protein A	8025822726	Paenibacillus sp. ClWae2A	1	1013820	1014110		8025822726
8025823647	Ga0609718_01_1079507_1082947	5-methyltetrahydrofolate--homocysteine methyltransferase	8025822726	Paenibacillus sp. ClWae2A	1	1079507	1082947		8025822726	COG1410===Methionine synthase I, cobalamin-binding domain<<>>COG0646===Methionine synthase I (cobalamin-dependent), methyltransferase domain	pfam02574===S-methyl_trans<<>>pfam02965===Met_synt_B12<<>>pfam02607===B12-binding_2<<>>pfam00809===Pterin_bind<<>>pfam02310===B12-binding
8025827807	Ga0609718_11_77994_79079	5-methyltetrahydropteroyltriglutamate--homocysteine methyltransferase	8025822726	Paenibacillus sp. ClWae2A	1	77994	79079		8025822736	COG0620===Methionine synthase II (cobalamin-independent)	pfam01717===Meth_synt_2
8025827645	Ga0609718_10_96119_97279	5-methyltetrahydropteroyltriglutamate--homocysteine methyltransferase	8025822726	Paenibacillus sp. ClWae2A	1	96119	97279		8025822735	COG0620===Methionine synthase II (cobalamin-independent)
8025823010	Ga0609718_01_342750_345044	5-methyltetrahydropteroyltriglutamate--homocysteine methyltransferase	8025822726	Paenibacillus sp. ClWae2A	1	342750	345044		8025822726	COG0620===Methionine synthase II (cobalamin-independent)	pfam01717===Meth_synt_2<<>>pfam08267===Meth_synt_1
8025823511	Ga0609718_01_934997_936319	5-methylthioadenosine/S-adenosylhomocysteine deaminase	8025822726	Paenibacillus sp. ClWae2A	1	934997	936319		8025822726	COG0402===Cytosine/adenosine deaminase or related metal-dependent hydrolase	pfam01979===Amidohydro_1
8025823567	Ga0609718_01_998056_999426	5-methylthioadenosine/S-adenosylhomocysteine deaminase	8025822726	Paenibacillus sp. ClWae2A	1	998056	999426		8025822726	COG0402===Cytosine/adenosine deaminase or related metal-dependent hydrolase	pfam01979===Amidohydro_1
8025822733	Ga0609718_01_7792_9084	5-methylthioadenosine/S-adenosylhomocysteine deaminase	8025822726	Paenibacillus sp. ClWae2A	1	7792	9084		8025822726	COG0402===Cytosine/adenosine deaminase or related metal-dependent hydrolase	pfam01979===Amidohydro_1
8025823860	Ga0609718_01_1336520_1337827	5-methylthioadenosine/S-adenosylhomocysteine deaminase	8025822726	Paenibacillus sp. ClWae2A	1	1336520	1337827		8025822726	COG0402===Cytosine/adenosine deaminase or related metal-dependent hydrolase	pfam01979===Amidohydro_1
8025824754	Ga0609718_02_816764_817981	5-methylthioribose kinase	8025822726	Paenibacillus sp. ClWae2A	1	816764	817981		8025822727	COG4857===5-Methylthioribose kinase, methionine salvage pathway	pfam01636===APH
8025829084	Ga0609718_24_1_108	5S ribosomal RNA	8025822726	Paenibacillus sp. ClWae2A	1	1	108		8025822749
8025829180	Ga0609718_26_1_107	5S ribosomal RNA	8025822726	Paenibacillus sp. ClWae2A	1	1	107		8025822751
8025829031	Ga0609718_23_1_109	5S ribosomal RNA	8025822726	Paenibacillus sp. ClWae2A	1	1	109		8025822748
8025828828	Ga0609718_20_1_109	5S ribosomal RNA	8025822726	Paenibacillus sp. ClWae2A	1	1	109		8025822745
8025826782	Ga0609718_06_323141_323257	5S ribosomal RNA	8025822726	Paenibacillus sp. ClWae2A	1	323141	323257		8025822731
8025825078	Ga0609718_03_61982_62449	6,7-dimethyl-8-ribityllumazine synthase	8025822726	Paenibacillus sp. ClWae2A	1	61982	62449		8025822728	COG0054===6,7-dimethyl-8-ribityllumazine synthase (Riboflavin synthase beta chain)	pfam00885===DMRL_synthase
8025823995	Ga0609718_02_61723_62286	6-phospho-3-hexuloisomerase	8025822726	Paenibacillus sp. ClWae2A	1	61723	62286		8025822727	COG0794===D-arabinose 5-phosphate isomerase GutQ	pfam01380===SIS
8025822817	Ga0609718_01_122779_124221	6-phospho-beta-glucosidase	8025822726	Paenibacillus sp. ClWae2A	1	122779	124221		8025822726	COG2723===Beta-glucosidase/6-phospho-beta-glucosidase/beta-galactosidase	pfam00232===Glyco_hydro_1
8025825703	Ga0609718_03_736930_738387	6-phospho-beta-glucosidase	8025822726	Paenibacillus sp. ClWae2A	1	736930	738387		8025822728	COG2723===Beta-glucosidase/6-phospho-beta-glucosidase/beta-galactosidase	pfam00232===Glyco_hydro_1
8025825702	Ga0609718_03_735313_736737	6-phospho-beta-glucosidase	8025822726	Paenibacillus sp. ClWae2A	1	735313	736737		8025822728	COG2723===Beta-glucosidase/6-phospho-beta-glucosidase/beta-galactosidase	pfam00232===Glyco_hydro_1
8025827911	Ga0609718_12_20485_21942	6-phospho-beta-glucosidase	8025822726	Paenibacillus sp. ClWae2A	1	20485	21942		8025822737	COG2723===Beta-glucosidase/6-phospho-beta-glucosidase/beta-galactosidase	pfam00232===Glyco_hydro_1
8025823162	Ga0609718_01_525308_526774	6-phospho-beta-glucosidase	8025822726	Paenibacillus sp. ClWae2A	1	525308	526774		8025822726	COG2723===Beta-glucosidase/6-phospho-beta-glucosidase/beta-galactosidase	pfam00232===Glyco_hydro_1
8025823730	Ga0609718_01_1188411_1189874	6-phospho-beta-glucosidase	8025822726	Paenibacillus sp. ClWae2A	1	1188411	1189874		8025822726	COG2723===Beta-glucosidase/6-phospho-beta-glucosidase/beta-galactosidase	pfam00232===Glyco_hydro_1
8025823833	Ga0609718_01_1307397_1308854	6-phospho-beta-glucosidase	8025822726	Paenibacillus sp. ClWae2A	1	1307397	1308854		8025822726	COG2723===Beta-glucosidase/6-phospho-beta-glucosidase/beta-galactosidase	pfam00232===Glyco_hydro_1
8025822870	Ga0609718_01_193397_194821	6-phospho-beta-glucosidase	8025822726	Paenibacillus sp. ClWae2A	1	193397	194821		8025822726	COG2723===Beta-glucosidase/6-phospho-beta-glucosidase/beta-galactosidase	pfam00232===Glyco_hydro_1
8025827232	Ga0609718_08_148746_150179	6-phospho-beta-glucosidase	8025822726	Paenibacillus sp. ClWae2A	1	148746	150179		8025822733	COG2723===Beta-glucosidase/6-phospho-beta-glucosidase/beta-galactosidase	pfam00232===Glyco_hydro_1
8025823191	Ga0609718_01_554132_555454	6-phospho-beta-glucosidase	8025822726	Paenibacillus sp. ClWae2A	1	554132	555454		8025822726	COG1486===Alpha-galactosidase/6-phospho-beta-glucosidase, family 4 of glycosyl hydrolase	pfam02056===Glyco_hydro_4<<>>pfam11975===Glyco_hydro_4C
8025823313	Ga0609718_01_723552_724994	6-phospho-beta-glucosidase	8025822726	Paenibacillus sp. ClWae2A	1	723552	724994		8025822726	COG2723===Beta-glucosidase/6-phospho-beta-glucosidase/beta-galactosidase	pfam00232===Glyco_hydro_1
8025823718	Ga0609718_01_1173498_1174940	6-phospho-beta-glucosidase	8025822726	Paenibacillus sp. ClWae2A	1	1173498	1174940		8025822726	COG2723===Beta-glucosidase/6-phospho-beta-glucosidase/beta-galactosidase	pfam00232===Glyco_hydro_1
8025824491	Ga0609718_02_569798_570769	6-phosphofructokinase 1	8025822726	Paenibacillus sp. ClWae2A	1	569798	570769		8025822727	COG0205===6-phosphofructokinase	pfam00365===PFK
8025823735	Ga0609718_01_1195679_1197097	6-phosphogluconate dehydrogenase	8025822726	Paenibacillus sp. ClWae2A	1	1195679	1197097		8025822726	COG0362===6-phosphogluconate dehydrogenase	pfam03446===NAD_binding_2<<>>pfam00393===6PGD
8025825319	Ga0609718_03_321495_322916	6-phosphogluconate dehydrogenase	8025822726	Paenibacillus sp. ClWae2A	1	321495	322916		8025822728	COG0362===6-phosphogluconate dehydrogenase	pfam03446===NAD_binding_2<<>>pfam00393===6PGD
8025826451	Ga0609718_05_314894_315787	6-phosphogluconate dehydrogenase	8025822726	Paenibacillus sp. ClWae2A	1	314894	315787		8025822730	COG1023===6-phosphogluconate dehydrogenase (decarboxylating)	pfam03446===NAD_binding_2<<>>pfam00393===6PGD
8025823997	Ga0609718_02_63297_64379	6-phosphogluconolactonase	8025822726	Paenibacillus sp. ClWae2A	1	63297	64379		8025822727	COG2706===6-phosphogluconolactonase, cycloisomerase 2 family	pfam10282===Lactonase
8025828188	Ga0609718_13_144751_145185	6-phosphogluconolactonase (cycloisomerase 2 family)	8025822726	Paenibacillus sp. ClWae2A	1	144751	145185		8025822738	COG2706===6-phosphogluconolactonase, cycloisomerase 2 family	pfam10282===Lactonase
8025827092	Ga0609718_07_314360_314851	6-pyruvoyltetrahydropterin/6-carboxytetrahydropterin synthase	8025822726	Paenibacillus sp. ClWae2A	1	314360	314851		8025822732	COG0720===6-pyruvoyl-tetrahydropterin synthase	pfam01242===PTPS
8025827995	Ga0609718_12_130296_130778	6-pyruvoyltetrahydropterin/6-carboxytetrahydropterin synthase	8025822726	Paenibacillus sp. ClWae2A	1	130296	130778		8025822737	COG0720===6-pyruvoyl-tetrahydropterin synthase	pfam01242===PTPS
8025826530	Ga0609718_06_26640_28133	60 kDa SS-A/Ro ribonucleoprotein	8025822726	Paenibacillus sp. ClWae2A	1	26640	28133		8025822731		pfam05731===TROVE
8025824484	Ga0609718_02_562470_562661	6S / SsrS RNA	8025822726	Paenibacillus sp. ClWae2A	1	562470	562661		8025822727
8025827093	Ga0609718_07_314844_315617	7-carboxy-7-deazaguanine synthase	8025822726	Paenibacillus sp. ClWae2A	1	314844	315617		8025822732	COG0602===Organic radical activating enzyme	pfam13353===Fer4_12<<>>pfam04055===Radical_SAM
8025827996	Ga0609718_12_130747_131484	7-carboxy-7-deazaguanine synthase	8025822726	Paenibacillus sp. ClWae2A	1	130747	131484		8025822737	COG0602===Organic radical activating enzyme	pfam13353===Fer4_12
8025827094	Ga0609718_07_315766_316257	7-cyano-7-deazaguanine reductase	8025822726	Paenibacillus sp. ClWae2A	1	315766	316257		8025822732	COG0780===NADPH-dependent 7-cyano-7-deazaguanine reductase QueF, C-terminal domain, T-fold superfamily	pfam14489===QueF
8025827994	Ga0609718_12_129640_130299	7-cyano-7-deazaguanine synthase	8025822726	Paenibacillus sp. ClWae2A	1	129640	130299		8025822737	COG0603===7-cyano-7-deazaguanine synthase (queuosine biosynthesis)	pfam06508===QueC
8025827091	Ga0609718_07_313680_314363	7-cyano-7-deazaguanine synthase	8025822726	Paenibacillus sp. ClWae2A	1	313680	314363		8025822732	COG0603===7-cyano-7-deazaguanine synthase (queuosine biosynthesis)	pfam06508===QueC
8025827990	Ga0609718_12_124799_125728	7-cyano-7-deazaguanine tRNA-ribosyltransferase	8025822726	Paenibacillus sp. ClWae2A	1	124799	125728		8025822737		pfam01702===TGT
8025824196	Ga0609718_02_243447_244250	8-oxo-dGTP diphosphatase	8025822726	Paenibacillus sp. ClWae2A	1	243447	244250		8025822727	COG1051===ADP-ribose pyrophosphatase YjhB, NUDIX family	pfam00293===NUDIX
8025828524	Ga0609718_16_20307_20927	8-oxo-dGTP diphosphatase	8025822726	Paenibacillus sp. ClWae2A	1	20307	20927		8025822741	COG0494===8-oxo-dGTP pyrophosphatase MutT and related house-cleaning NTP pyrophosphohydrolases, NUDIX family	pfam00293===NUDIX
8025828233	Ga0609718_14_15261_15719	8-oxo-dGTP diphosphatase	8025822726	Paenibacillus sp. ClWae2A	1	15261	15719		8025822739	COG1051===ADP-ribose pyrophosphatase YjhB, NUDIX family	pfam00293===NUDIX
8025824091	Ga0609718_02_153821_154222	8-oxo-dGTP diphosphatase	8025822726	Paenibacillus sp. ClWae2A	1	153821	154222		8025822727	COG0494===8-oxo-dGTP pyrophosphatase MutT and related house-cleaning NTP pyrophosphohydrolases, NUDIX family	pfam00293===NUDIX
8025824927	Ga0609718_02_1018561_1019235	8-oxo-dGTP diphosphatase	8025822726	Paenibacillus sp. ClWae2A	1	1018561	1019235		8025822727	COG1051===ADP-ribose pyrophosphatase YjhB, NUDIX family	pfam00293===NUDIX
8025823154	Ga0609718_01_516130_516594	8-oxo-dGTP diphosphatase	8025822726	Paenibacillus sp. ClWae2A	1	516130	516594		8025822726	COG1051===ADP-ribose pyrophosphatase YjhB, NUDIX family	pfam00293===NUDIX
8025826565	Ga0609718_06_65585_66523	8-oxo-dGTP diphosphatase	8025822726	Paenibacillus sp. ClWae2A	1	65585	66523		8025822731	COG1051===ADP-ribose pyrophosphatase YjhB, NUDIX family	pfam00293===NUDIX<<>>pfam19368===AraR_C
8025824998	Ga0609718_02_1083552_1084091	8-oxo-dGTP diphosphatase	8025822726	Paenibacillus sp. ClWae2A	1	1083552	1084091		8025822727	COG1051===ADP-ribose pyrophosphatase YjhB, NUDIX family	pfam00293===NUDIX
8025823554	Ga0609718_01_981772_982197	8-oxo-dGTP diphosphatase	8025822726	Paenibacillus sp. ClWae2A	1	981772	982197		8025822726	COG0494===8-oxo-dGTP pyrophosphatase MutT and related house-cleaning NTP pyrophosphohydrolases, NUDIX family	pfam00293===NUDIX
8025824054	Ga0609718_02_124431_124898	8-oxo-dGTP diphosphatase	8025822726	Paenibacillus sp. ClWae2A	1	124431	124898		8025822727	COG0494===8-oxo-dGTP pyrophosphatase MutT and related house-cleaning NTP pyrophosphohydrolases, NUDIX family	pfam00293===NUDIX
8025823552	Ga0609718_01_980058_980486	8-oxo-dGTP diphosphatase	8025822726	Paenibacillus sp. ClWae2A	1	980058	980486		8025822726	COG1051===ADP-ribose pyrophosphatase YjhB, NUDIX family	pfam00293===NUDIX
8025824178	Ga0609718_02_225437_225886	8-oxo-dGTP pyrophosphatase MutT (NUDIX family)	8025822726	Paenibacillus sp. ClWae2A	1	225437	225886		8025822727	COG0494===8-oxo-dGTP pyrophosphatase MutT and related house-cleaning NTP pyrophosphohydrolases, NUDIX family	pfam00293===NUDIX
8025825010	Ga0609718_02_1092328_1092780	8-oxo-dGTP pyrophosphatase MutT (NUDIX family)	8025822726	Paenibacillus sp. ClWae2A	1	1092328	1092780		8025822727	COG0494===8-oxo-dGTP pyrophosphatase MutT and related house-cleaning NTP pyrophosphohydrolases, NUDIX family	pfam00293===NUDIX
8025828542	Ga0609718_16_35874_36179	8-oxo-dGTP pyrophosphatase MutT (NUDIX family)	8025822726	Paenibacillus sp. ClWae2A	1	35874	36179		8025822741	COG0494===8-oxo-dGTP pyrophosphatase MutT and related house-cleaning NTP pyrophosphohydrolases, NUDIX family	pfam00293===NUDIX
8025824924	Ga0609718_02_1016995_1017429	8-oxo-dGTP pyrophosphatase MutT (NUDIX family)	8025822726	Paenibacillus sp. ClWae2A	1	1016995	1017429		8025822727	COG0494===8-oxo-dGTP pyrophosphatase MutT and related house-cleaning NTP pyrophosphohydrolases, NUDIX family	pfam00293===NUDIX
8025825495	Ga0609718_03_503697_504131	8-oxo-dGTP pyrophosphatase MutT (NUDIX family)	8025822726	Paenibacillus sp. ClWae2A	1	503697	504131		8025822728	COG0494===8-oxo-dGTP pyrophosphatase MutT and related house-cleaning NTP pyrophosphohydrolases, NUDIX family	pfam00293===NUDIX
8025823711	Ga0609718_01_1166577_1167782	[acyl-carrier-protein] S-malonyltransferase	8025822726	Paenibacillus sp. ClWae2A	1	1166577	1167782		8025822726	COG0331===Malonyl CoA-acyl carrier protein transacylase	pfam00698===Acyl_transf_1
8025827348	Ga0609718_08_283991_285181	[acyl-carrier-protein] S-malonyltransferase	8025822726	Paenibacillus sp. ClWae2A	1	283991	285181		8025822733	COG0331===Malonyl CoA-acyl carrier protein transacylase	pfam00698===Acyl_transf_1
8025824323	Ga0609718_02_373606_374547	[acyl-carrier-protein] S-malonyltransferase	8025822726	Paenibacillus sp. ClWae2A	1	373606	374547		8025822727	COG0331===Malonyl CoA-acyl carrier protein transacylase	pfam00698===Acyl_transf_1
8025828615	Ga0609718_17_10490_11845	A/G-specific adenine glycosylase	8025822726	Paenibacillus sp. ClWae2A	1	10490	11845		8025822742	COG1194===Adenine-specific DNA glycosylase, acts on AG and A-oxoG pairs	pfam14815===NUDIX_4<<>>pfam00730===HhH-GPD
8025823421	Ga0609718_01_832704_834521	AAA15 family ATPase/GTPase	8025822726	Paenibacillus sp. ClWae2A	1	832704	834521		8025822726	COG1106===ATPase/GTPase, AAA15 family	pfam13304===AAA_21
8025826722	Ga0609718_06_248675_250027	AAT family amino acid transporter	8025822726	Paenibacillus sp. ClWae2A	1	248675	250027		8025822731	COG1113===L-asparagine transporter and related permeases	pfam00324===AA_permease
8025827695	Ga0609718_10_157274_158653	AAT family amino acid transporter	8025822726	Paenibacillus sp. ClWae2A	1	157274	158653		8025822735	COG1113===L-asparagine transporter and related permeases	pfam00324===AA_permease
8025826938	Ga0609718_07_147409_148314	ABC-2 type transport system ATP-binding protein	8025822726	Paenibacillus sp. ClWae2A	1	147409	148314		8025822732	COG1131===ABC-type multidrug transport system, ATPase component	pfam00005===ABC_tran
8025826536	Ga0609718_06_32229_32927	ABC-2 type transport system ATP-binding protein	8025822726	Paenibacillus sp. ClWae2A	1	32229	32927		8025822731	COG1131===ABC-type multidrug transport system, ATPase component	pfam00005===ABC_tran
8025828441	Ga0609718_15_45750_46673	ABC-2 type transport system ATP-binding protein	8025822726	Paenibacillus sp. ClWae2A	1	45750	46673		8025822740	COG1131===ABC-type multidrug transport system, ATPase component	pfam00005===ABC_tran
8025827622	Ga0609718_10_67702_68706	ABC-2 type transport system ATP-binding protein	8025822726	Paenibacillus sp. ClWae2A	1	67702	68706		8025822735	COG4586===ABC-type uncharacterized transport system, ATPase component	pfam00005===ABC_tran
8025826851	Ga0609718_07_68027_68893	ABC-2 type transport system ATP-binding protein	8025822726	Paenibacillus sp. ClWae2A	1	68027	68893		8025822732	COG1131===ABC-type multidrug transport system, ATPase component	pfam00005===ABC_tran
8025826552	Ga0609718_06_50660_51562	ABC-2 type transport system ATP-binding protein	8025822726	Paenibacillus sp. ClWae2A	1	50660	51562		8025822731	COG1131===ABC-type multidrug transport system, ATPase component	pfam00005===ABC_tran
8025828435	Ga0609718_15_40104_41078	ABC-2 type transport system ATP-binding protein	8025822726	Paenibacillus sp. ClWae2A	1	40104	41078		8025822740	COG4586===ABC-type uncharacterized transport system, ATPase component	pfam00005===ABC_tran
8025828055	Ga0609718_13_4320_5216	ABC-2 type transport system ATP-binding protein	8025822726	Paenibacillus sp. ClWae2A	1	4320	5216		8025822738	COG1131===ABC-type multidrug transport system, ATPase component	pfam00005===ABC_tran
8025826330	Ga0609718_05_181289_182041	ABC-2 type transport system ATP-binding protein	8025822726	Paenibacillus sp. ClWae2A	1	181289	182041		8025822730	COG1131===ABC-type multidrug transport system, ATPase component	pfam00005===ABC_tran
8025824185	Ga0609718_02_232751_233806	ABC-2 type transport system ATP-binding protein	8025822726	Paenibacillus sp. ClWae2A	1	232751	233806		8025822727	COG1131===ABC-type multidrug transport system, ATPase component	pfam00005===ABC_tran
8025826270	Ga0609718_05_114254_115387	ABC-2 type transport system ATP-binding protein	8025822726	Paenibacillus sp. ClWae2A	1	114254	115387		8025822730	COG1131===ABC-type multidrug transport system, ATPase component	pfam00005===ABC_tran
8025828671	Ga0609718_17_69361_70407	ABC-2 type transport system ATP-binding protein	8025822726	Paenibacillus sp. ClWae2A	1	69361	70407		8025822742	COG4586===ABC-type uncharacterized transport system, ATPase component	pfam00005===ABC_tran
8025828169	Ga0609718_13_124684_125679	ABC-2 type transport system ATP-binding protein	8025822726	Paenibacillus sp. ClWae2A	1	124684	125679		8025822738	COG4586===ABC-type uncharacterized transport system, ATPase component	pfam00005===ABC_tran
8025828054	Ga0609718_13_3397_4302	ABC-2 type transport system ATP-binding protein	8025822726	Paenibacillus sp. ClWae2A	1	3397	4302		8025822738	COG4152===ABC-type uncharacterized transport system, ATPase component	pfam13732===DUF4162<<>>pfam00005===ABC_tran
8025826998	Ga0609718_07_214536_215444	ABC-2 type transport system ATP-binding protein	8025822726	Paenibacillus sp. ClWae2A	1	214536	215444		8025822732	COG1131===ABC-type multidrug transport system, ATPase component	pfam00005===ABC_tran
8025827416	Ga0609718_09_67544_68329	ABC-2 type transport system ATP-binding protein	8025822726	Paenibacillus sp. ClWae2A	1	67544	68329		8025822734	COG1131===ABC-type multidrug transport system, ATPase component	pfam00005===ABC_tran
8025827546	Ga0609718_09_209416_210291	ABC-2 type transport system ATP-binding protein	8025822726	Paenibacillus sp. ClWae2A	1	209416	210291		8025822734	COG1131===ABC-type multidrug transport system, ATPase component	pfam00005===ABC_tran
8025823814	Ga0609718_01_1279687_1280652	ABC-2 type transport system ATP-binding protein	8025822726	Paenibacillus sp. ClWae2A	1	1279687	1280652		8025822726	COG1131===ABC-type multidrug transport system, ATPase component	pfam00005===ABC_tran
8025828606	Ga0609718_17_1428_2159	ABC-2 type transport system ATP-binding protein	8025822726	Paenibacillus sp. ClWae2A	1	1428	2159		8025822742	COG1131===ABC-type multidrug transport system, ATPase component	pfam00005===ABC_tran
8025826146	Ga0609718_04_443655_444590	ABC-2 type transport system ATP-binding protein	8025822726	Paenibacillus sp. ClWae2A	1	443655	444590		8025822729	COG1131===ABC-type multidrug transport system, ATPase component	pfam00005===ABC_tran
8025823342	Ga0609718_01_755848_756594	ABC-2 type transport system ATP-binding protein	8025822726	Paenibacillus sp. ClWae2A	1	755848	756594		8025822726	COG1131===ABC-type multidrug transport system, ATPase component	pfam00005===ABC_tran
8025827654	Ga0609718_10_106115_107287	ABC-2 type transport system permease protein	8025822726	Paenibacillus sp. ClWae2A	1	106115	107287		8025822735		pfam12698===ABC2_membrane_3
8025828168	Ga0609718_13_123872_124672	ABC-2 type transport system permease protein	8025822726	Paenibacillus sp. ClWae2A	1	123872	124672		8025822738	COG4587===ABC-type uncharacterized transport system, permease component	pfam06182===ABC2_membrane_6
8025826329	Ga0609718_05_180069_181286	ABC-2 type transport system permease protein	8025822726	Paenibacillus sp. ClWae2A	1	180069	181286		8025822730	COG4473===Predicted ABC-type exoprotein transport system, permease component	pfam05975===EcsB
8025826997	Ga0609718_07_213752_214543	ABC-2 type transport system permease protein	8025822726	Paenibacillus sp. ClWae2A	1	213752	214543		8025822732	COG1277===ABC-type transport system involved in multi-copper enzyme maturation, permease component	pfam12730===ABC2_membrane_4
8025828436	Ga0609718_15_41095_41895	ABC-2 type transport system permease protein	8025822726	Paenibacillus sp. ClWae2A	1	41095	41895		8025822740	COG3694===ABC-type uncharacterized transport system, permease component	pfam06182===ABC2_membrane_6
8025827623	Ga0609718_10_68684_69493	ABC-2 type transport system permease protein	8025822726	Paenibacillus sp. ClWae2A	1	68684	69493		8025822735	COG4587===ABC-type uncharacterized transport system, permease component	pfam06182===ABC2_membrane_6
8025827624	Ga0609718_10_69498_70310	ABC-2 type transport system permease protein	8025822726	Paenibacillus sp. ClWae2A	1	69498	70310		8025822735	COG3694===ABC-type uncharacterized transport system, permease component	pfam06182===ABC2_membrane_6
8025826148	Ga0609718_04_445792_446970	ABC-2 type transport system permease protein	8025822726	Paenibacillus sp. ClWae2A	1	445792	446970		8025822729	COG0842===ABC-type multidrug transport system, permease component	pfam12698===ABC2_membrane_3
8025828673	Ga0609718_17_71208_71993	ABC-2 type transport system permease protein	8025822726	Paenibacillus sp. ClWae2A	1	71208	71993		8025822742	COG3694===ABC-type uncharacterized transport system, permease component	pfam06182===ABC2_membrane_6
8025828672	Ga0609718_17_70409_71203	ABC-2 type transport system permease protein	8025822726	Paenibacillus sp. ClWae2A	1	70409	71203		8025822742	COG4587===ABC-type uncharacterized transport system, permease component	pfam06182===ABC2_membrane_6
8025828437	Ga0609718_15_41892_42668	ABC-2 type transport system permease protein	8025822726	Paenibacillus sp. ClWae2A	1	41892	42668		8025822740	COG4587===ABC-type uncharacterized transport system, permease component	pfam06182===ABC2_membrane_6
8025826939	Ga0609718_07_148307_149140	ABC-2 type transport system permease protein	8025822726	Paenibacillus sp. ClWae2A	1	148307	149140		8025822732	COG2386===ABC-type transport system involved in cytochrome c biogenesis, permease component	pfam12679===ABC2_membrane_2
8025828053	Ga0609718_13_2109_3404	ABC-2 type transport system permease protein	8025822726	Paenibacillus sp. ClWae2A	1	2109	3404		8025822738	COG1668===ABC-type Na+ efflux pump, permease component	pfam12698===ABC2_membrane_3
8025826147	Ga0609718_04_444603_445799	ABC-2 type transport system permease protein	8025822726	Paenibacillus sp. ClWae2A	1	444603	445799		8025822729	COG0842===ABC-type multidrug transport system, permease component	pfam12698===ABC2_membrane_3
8025826551	Ga0609718_06_48658_50685	ABC-2 type transport system permease protein	8025822726	Paenibacillus sp. ClWae2A	1	48658	50685		8025822731
8025828607	Ga0609718_17_2181_3428	ABC-2 type transport system permease protein	8025822726	Paenibacillus sp. ClWae2A	1	2181	3428		8025822742		pfam05975===EcsB
8025826269	Ga0609718_05_113541_114257	ABC-2 type transport system permease protein	8025822726	Paenibacillus sp. ClWae2A	1	113541	114257		8025822730	COG1277===ABC-type transport system involved in multi-copper enzyme maturation, permease component	pfam12679===ABC2_membrane_2
8025828167	Ga0609718_13_123066_123869	ABC-2 type transport system permease protein	8025822726	Paenibacillus sp. ClWae2A	1	123066	123869		8025822738	COG3694===ABC-type uncharacterized transport system, permease component	pfam06182===ABC2_membrane_6
8025826850	Ga0609718_07_67408_68034	ABC-2 type transport system permease protein	8025822726	Paenibacillus sp. ClWae2A	1	67408	68034		8025822732	COG3476===Tryptophan-rich sensory protein (mitochondrial benzodiazepine receptor homolog)	pfam13346===ABC2_membrane_5
8025823813	Ga0609718_01_1278705_1279694	ABC-2 type transport system permease protein	8025822726	Paenibacillus sp. ClWae2A	1	1278705	1279694		8025822726	COG1277===ABC-type transport system involved in multi-copper enzyme maturation, permease component	pfam12679===ABC2_membrane_2
8025829176	Ga0609718_25_27133_27954	ABC-type amino acid transport substrate-binding protein	8025822726	Paenibacillus sp. ClWae2A	1	27133	27954		8025822750	COG0834===ABC-type amino acid transport/signal transduction system, periplasmic component/domain	pfam00497===SBP_bac_3
8025825792	Ga0609718_04_44330_44644	ABC-type antimicrobial peptide transport system permease subunit	8025822726	Paenibacillus sp. ClWae2A	1	44330	44644		8025822729	COG0577===ABC-type antimicrobial peptide transport system, permease component
8025826605	Ga0609718_06_116155_117525	ABC-type antimicrobial peptide transport system permease subunit	8025822726	Paenibacillus sp. ClWae2A	1	116155	117525		8025822731	COG0577===ABC-type antimicrobial peptide transport system, permease component	pfam02687===FtsX<<>>pfam12704===MacB_PCD
8025828287	Ga0609718_14_61480_63699	ABC-type bacteriocin/lantibiotic exporter with double-glycine peptidase domain	8025822726	Paenibacillus sp. ClWae2A	1	61480	63699		8025822739	COG2274===ABC-type bacteriocin/lantibiotic exporters, contain an N-terminal double-glycine peptidase domain	pfam00664===ABC_membrane<<>>pfam00005===ABC_tran<<>>pfam03412===Peptidase_C39
8025828599	Ga0609718_16_89738_91558	ABC-type bacteriocin/lantibiotic exporter with double-glycine peptidase domain	8025822726	Paenibacillus sp. ClWae2A	1	89738	91558		8025822741	COG2274===ABC-type bacteriocin/lantibiotic exporters, contain an N-terminal double-glycine peptidase domain	pfam00664===ABC_membrane<<>>pfam00005===ABC_tran
8025826433	Ga0609718_05_299650_299850	ABC-type bacteriocin/lantibiotic exporter with double-glycine peptidase domain	8025822726	Paenibacillus sp. ClWae2A	1	299650	299850		8025822730	COG2274===ABC-type bacteriocin/lantibiotic exporters, contain an N-terminal double-glycine peptidase domain
8025827309	Ga0609718_08_240047_240289	ABC-type dipeptide/oligopeptide/nickel transport system ATPase subunit	8025822726	Paenibacillus sp. ClWae2A	1	240047	240289		8025822733	COG1124===ABC-type dipeptide/oligopeptide/nickel transport system, ATPase component
8025824497	Ga0609718_02_575387_575572	ABC-type dipeptide/oligopeptide/nickel transport system permease component	8025822726	Paenibacillus sp. ClWae2A	1	575387	575572		8025822727	COG0601===ABC-type dipeptide/oligopeptide/nickel transport system, permease component
8025825341	Ga0609718_03_337308_337616	ABC-type dipeptide/oligopeptide/nickel transport system permease component	8025822726	Paenibacillus sp. ClWae2A	1	337308	337616		8025822728	COG0601===ABC-type dipeptide/oligopeptide/nickel transport system, permease component
8025827921	Ga0609718_12_34978_35829	ABC-type dipeptide/oligopeptide/nickel transport system permease subunit	8025822726	Paenibacillus sp. ClWae2A	1	34978	35829		8025822737	COG1173===ABC-type dipeptide/oligopeptide/nickel transport system, permease component	pfam00528===BPD_transp_1
8025822977	Ga0609718_01_308289_308555	ABC-type enterobactin transport system permease subunit	8025822726	Paenibacillus sp. ClWae2A	1	308289	308555		8025822726	COG4779===ABC-type enterobactin transport system, permease component
8025823427	Ga0609718_01_838473_838628	ABC-type Fe3+-citrate transport system substrate-binding protein	8025822726	Paenibacillus sp. ClWae2A	1	838473	838628		8025822726	COG4594===ABC-type Fe3+-citrate transport system, periplasmic component
8025825648	Ga0609718_03_673894_674895	ABC-type Fe3+-hydroxamate transport system substrate-binding protein	8025822726	Paenibacillus sp. ClWae2A	1	673894	674895		8025822728	COG0614===ABC-type Fe3+-hydroxamate transport system, periplasmic component	pfam01497===Peripla_BP_2
8025825655	Ga0609718_03_682019_683635	ABC-type Fe3+-hydroxamate transport system substrate-binding protein	8025822726	Paenibacillus sp. ClWae2A	1	682019	683635		8025822728	COG0614===ABC-type Fe3+-hydroxamate transport system, periplasmic component	pfam12833===HTH_18<<>>pfam01497===Peripla_BP_2
8025828327	Ga0609718_14_105164_106747	ABC-type Fe3+-hydroxamate transport system substrate-binding protein	8025822726	Paenibacillus sp. ClWae2A	1	105164	106747		8025822739	COG0614===ABC-type Fe3+-hydroxamate transport system, periplasmic component	pfam12833===HTH_18<<>>pfam01497===Peripla_BP_2
8025828538	Ga0609718_16_32475_34097	ABC-type Fe3+-hydroxamate transport system substrate-binding protein	8025822726	Paenibacillus sp. ClWae2A	1	32475	34097		8025822741	COG0614===ABC-type Fe3+-hydroxamate transport system, periplasmic component	pfam12833===HTH_18<<>>pfam01497===Peripla_BP_2
8025825637	Ga0609718_03_656144_657772	ABC-type Fe3+-hydroxamate transport system substrate-binding protein	8025822726	Paenibacillus sp. ClWae2A	1	656144	657772		8025822728	COG0614===ABC-type Fe3+-hydroxamate transport system, periplasmic component	pfam12833===HTH_18<<>>pfam01497===Peripla_BP_2
8025825916	Ga0609718_04_201265_202911	ABC-type Fe3+-hydroxamate transport system substrate-binding protein	8025822726	Paenibacillus sp. ClWae2A	1	201265	202911		8025822729	COG0614===ABC-type Fe3+-hydroxamate transport system, periplasmic component	pfam12833===HTH_18<<>>pfam01497===Peripla_BP_2
8025827555	Ga0609718_09_218545_220152	ABC-type Fe3+-hydroxamate transport system substrate-binding protein/AraC-like DNA-binding protein	8025822726	Paenibacillus sp. ClWae2A	1	218545	220152		8025822734	COG2207===AraC-type DNA-binding domain and AraC-containing proteins<<>>COG0614===ABC-type Fe3+-hydroxamate transport system, periplasmic component	pfam12833===HTH_18<<>>pfam01497===Peripla_BP_2
8025823840	Ga0609718_01_1316123_1317745	ABC-type Fe3+-hydroxamate transport system substrate-binding protein/AraC-like DNA-binding protein	8025822726	Paenibacillus sp. ClWae2A	1	1316123	1317745		8025822726	COG0614===ABC-type Fe3+-hydroxamate transport system, periplasmic component<<>>COG2207===AraC-type DNA-binding domain and AraC-containing proteins	pfam01497===Peripla_BP_2<<>>pfam12833===HTH_18
8025825647	Ga0609718_03_671849_673897	ABC-type Fe3+-siderophore transport system permease subunit	8025822726	Paenibacillus sp. ClWae2A	1	671849	673897		8025822728	COG0609===ABC-type Fe3+-siderophore transport system, permease component	pfam01032===FecCD
8025823093	Ga0609718_01_435933_436814	ABC-type glycerol-3-phosphate transport system permease component	8025822726	Paenibacillus sp. ClWae2A	1	435933	436814		8025822726	COG0395===ABC-type glycerol-3-phosphate transport system, permease component	pfam00528===BPD_transp_1
8025824962	Ga0609718_02_1048920_1049783	ABC-type glycerol-3-phosphate transport system permease component	8025822726	Paenibacillus sp. ClWae2A	1	1048920	1049783		8025822727	COG0395===ABC-type glycerol-3-phosphate transport system, permease component	pfam00528===BPD_transp_1
8025824957	Ga0609718_02_1042306_1043316	ABC-type glycerol-3-phosphate transport system permease component	8025822726	Paenibacillus sp. ClWae2A	1	1042306	1043316		8025822727	COG0395===ABC-type glycerol-3-phosphate transport system, permease component	pfam00528===BPD_transp_1
8025824633	Ga0609718_02_734263_735135	ABC-type glycerol-3-phosphate transport system permease component	8025822726	Paenibacillus sp. ClWae2A	1	734263	735135		8025822727	COG0395===ABC-type glycerol-3-phosphate transport system, permease component	pfam00528===BPD_transp_1
8025826949	Ga0609718_07_165821_166642	ABC-type glycerol-3-phosphate transport system permease component	8025822726	Paenibacillus sp. ClWae2A	1	165821	166642		8025822732	COG0395===ABC-type glycerol-3-phosphate transport system, permease component	pfam00528===BPD_transp_1
8025825441	Ga0609718_03_440284_441555	ABC-type glycerol-3-phosphate transport system substrate-binding protein	8025822726	Paenibacillus sp. ClWae2A	1	440284	441555		8025822728	COG1653===ABC-type glycerol-3-phosphate transport system, periplasmic component	pfam13416===SBP_bac_8
8025823090	Ga0609718_01_430602_431957	ABC-type glycerol-3-phosphate transport system substrate-binding protein	8025822726	Paenibacillus sp. ClWae2A	1	430602	431957		8025822726	COG1653===ABC-type glycerol-3-phosphate transport system, periplasmic component	pfam01547===SBP_bac_1
8025824964	Ga0609718_02_1050773_1053700	ABC-type glycerol-3-phosphate transport system substrate-binding protein	8025822726	Paenibacillus sp. ClWae2A	1	1050773	1053700		8025822727	COG1653===ABC-type glycerol-3-phosphate transport system, periplasmic component	pfam13416===SBP_bac_8
8025823933	Ga0609718_01_1402448_1402801	ABC-type glycerol-3-phosphate transport system substrate-binding protein	8025822726	Paenibacillus sp. ClWae2A	1	1402448	1402801		8025822726	COG1653===ABC-type glycerol-3-phosphate transport system, periplasmic component
8025823091	Ga0609718_01_432063_434960	ABC-type glycerol-3-phosphate transport system substrate-binding protein	8025822726	Paenibacillus sp. ClWae2A	1	432063	434960		8025822726	COG1653===ABC-type glycerol-3-phosphate transport system, periplasmic component	pfam13416===SBP_bac_8
8025827407	Ga0609718_09_55250_56563	ABC-type glycerol-3-phosphate transport system substrate-binding protein	8025822726	Paenibacillus sp. ClWae2A	1	55250	56563		8025822734	COG1653===ABC-type glycerol-3-phosphate transport system, periplasmic component	pfam01547===SBP_bac_1
8025826606	Ga0609718_06_117544_118227	ABC-type lipoprotein export system ATPase subunit	8025822726	Paenibacillus sp. ClWae2A	1	117544	118227		8025822731	COG1136===ABC-type lipoprotein export system, ATPase component	pfam00005===ABC_tran
8025827855	Ga0609718_11_128716_129018	ABC-type Mn2+/Zn2+ transport system permease subunit	8025822726	Paenibacillus sp. ClWae2A	1	128716	129018		8025822736	COG1108===ABC-type Mn2+/Zn2+ transport system, permease component
8025828212	Ga0609718_13_167527_168441	ABC-type multidrug transport system ATPase subunit	8025822726	Paenibacillus sp. ClWae2A	1	167527	168441		8025822738	COG1131===ABC-type multidrug transport system, ATPase component	pfam00005===ABC_tran
8025828292	Ga0609718_14_69847_70767	ABC-type multidrug transport system ATPase subunit	8025822726	Paenibacillus sp. ClWae2A	1	69847	70767		8025822739	COG1131===ABC-type multidrug transport system, ATPase component	pfam00005===ABC_tran
8025828598	Ga0609718_16_87766_89745	ABC-type multidrug transport system fused ATPase/permease subunit	8025822726	Paenibacillus sp. ClWae2A	1	87766	89745		8025822741	COG1132===ABC-type multidrug transport system, ATPase and permease component	pfam00664===ABC_membrane<<>>pfam00005===ABC_tran
8025824790	Ga0609718_02_860584_862404	ABC-type multidrug transport system fused ATPase/permease subunit	8025822726	Paenibacillus sp. ClWae2A	1	860584	862404		8025822727	COG1132===ABC-type multidrug transport system, ATPase and permease component	pfam00664===ABC_membrane<<>>pfam00005===ABC_tran
8025826723	Ga0609718_06_250165_250446	ABC-type multidrug transport system permease subunit	8025822726	Paenibacillus sp. ClWae2A	1	250165	250446		8025822731	COG0842===ABC-type multidrug transport system, permease component
8025825335	Ga0609718_03_335158_335271	ABC-type Na+ efflux pump permease subunit	8025822726	Paenibacillus sp. ClWae2A	1	335158	335271		8025822728	COG1668===ABC-type Na+ efflux pump, permease component
8025828256	Ga0609718_14_31740_32648	ABC-type nitrate/sulfonate/bicarbonate transport system ATPase subunit	8025822726	Paenibacillus sp. ClWae2A	1	31740	32648		8025822739	COG1116===ABC-type nitrate/sulfonate/bicarbonate transport system, ATPase component	pfam00005===ABC_tran
8025828255	Ga0609718_14_30944_31702	ABC-type nitrate/sulfonate/bicarbonate transport system permease component	8025822726	Paenibacillus sp. ClWae2A	1	30944	31702		8025822739	COG0600===ABC-type nitrate/sulfonate/bicarbonate transport system, permease component	pfam00528===BPD_transp_1
8025824507	Ga0609718_02_585685_586740	ABC-type nitrate/sulfonate/bicarbonate transport system substrate-binding protein	8025822726	Paenibacillus sp. ClWae2A	1	585685	586740		8025822727	COG0715===ABC-type nitrate/sulfonate/bicarbonate transport system, periplasmic component	pfam09084===NMT1
8025828253	Ga0609718_14_29399_30439	ABC-type nitrate/sulfonate/bicarbonate transport system substrate-binding protein	8025822726	Paenibacillus sp. ClWae2A	1	29399	30439		8025822739	COG0715===ABC-type nitrate/sulfonate/bicarbonate transport system, periplasmic component	pfam09084===NMT1
8025827918	Ga0609718_12_31721_32602	ABC-type oligopeptide transport system ATPase subunit	8025822726	Paenibacillus sp. ClWae2A	1	31721	32602		8025822737	COG4608===ABC-type oligopeptide transport system, ATPase component	pfam00005===ABC_tran
8025823592	Ga0609718_01_1019281_1020009	ABC-type polar amino acid transport system ATPase subunit	8025822726	Paenibacillus sp. ClWae2A	1	1019281	1020009		8025822726	COG1126===ABC-type polar amino acid transport system, ATPase component	pfam00005===ABC_tran
8025825256	Ga0609718_03_246349_247227	ABC-type sugar transport system permease subunit	8025822726	Paenibacillus sp. ClWae2A	1	246349	247227		8025822728	COG1175===ABC-type sugar transport system, permease component	pfam00528===BPD_transp_1
8025824634	Ga0609718_02_735334_736224	ABC-type sugar transport system permease subunit	8025822726	Paenibacillus sp. ClWae2A	1	735334	736224		8025822727	COG1175===ABC-type sugar transport system, permease component	pfam00528===BPD_transp_1
8025827406	Ga0609718_09_54166_55053	ABC-type sugar transport system permease subunit	8025822726	Paenibacillus sp. ClWae2A	1	54166	55053		8025822734	COG1175===ABC-type sugar transport system, permease component	pfam00528===BPD_transp_1
8025824958	Ga0609718_02_1043345_1044244	ABC-type sugar transport system permease subunit	8025822726	Paenibacillus sp. ClWae2A	1	1043345	1044244		8025822727	COG1175===ABC-type sugar transport system, permease component	pfam00528===BPD_transp_1
8025823097	Ga0609718_01_441560_442405	ABC-type sugar transport system permease subunit	8025822726	Paenibacillus sp. ClWae2A	1	441560	442405		8025822726	COG1175===ABC-type sugar transport system, permease component	pfam00528===BPD_transp_1
8025824071	Ga0609718_02_137696_138718	ABC-type sugar transport system substrate-binding protein	8025822726	Paenibacillus sp. ClWae2A	1	137696	138718		8025822727	COG1879===ABC-type sugar transport system, periplasmic component, contains N-terminal xre family HTH domain	pfam13407===Peripla_BP_4
8025824067	Ga0609718_02_132926_133978	ABC-type sugar transport system substrate-binding protein	8025822726	Paenibacillus sp. ClWae2A	1	132926	133978		8025822727	COG1879===ABC-type sugar transport system, periplasmic component, contains N-terminal xre family HTH domain	pfam13407===Peripla_BP_4
8025826370	Ga0609718_05_238855_239148	ABC-type transport system involved in cytochrome bd biosynthesis fused ATPase/permease subunit	8025822726	Paenibacillus sp. ClWae2A	1	238855	239148		8025822730	COG4987===ABC-type transport system involved in cytochrome bd biosynthesis, fused ATPase and permease components	pfam14068===YuiB
2931387367	Ga0501920_01_3433190_3434023	ABC-type transport system involved in cytochrome c biogenesis permease component	2931384279	Paenibacillus sp. DR312	2	3433190	3434023		2931384279	COG2386===ABC-type transport system involved in cytochrome c biogenesis, permease component	pfam12679===ABC2_membrane_2
8025825026	Ga0609718_03_5810_7072	ABC-type transport system involved in cytochrome c biogenesis permease subunit	8025822726	Paenibacillus sp. ClWae2A	1	5810	7072		8025822728	COG0755===ABC-type transport system involved in cytochrome c biogenesis, permease component	pfam01578===Cytochrom_C_asm
2912270608	Ga0479963_01_718874_720136	ABC-type transport system involved in cytochrome c biogenesis permease subunit	2912269976	Paenibacillus sp. JNUCC-31	2	718874	720136		2912269976	COG0755===ABC-type transport system involved in cytochrome c biogenesis, permease component	pfam01578===Cytochrom_C_asm
2912286920	Ga0480029_01_3823194_3824456	ABC-type transport system involved in cytochrome c biogenesis permease subunit	2912283337	Paenibacillus sp. E222	2	3823194	3824456		2912283337	COG0755===ABC-type transport system involved in cytochrome c biogenesis, permease component	pfam01578===Cytochrom_C_asm
2931389921	Ga0501920_01_6373743_6375005	ABC-type transport system involved in cytochrome c biogenesis permease subunit	2931384279	Paenibacillus sp. DR312	2	6373743	6375005		2931384279	COG0755===ABC-type transport system involved in cytochrome c biogenesis, permease component	pfam01578===Cytochrom_C_asm
8025828442	Ga0609718_15_46666_47364	ABC-type transport system involved in multi-copper enzyme maturation permease subunit	8025822726	Paenibacillus sp. ClWae2A	1	46666	47364		8025822740	COG1277===ABC-type transport system involved in multi-copper enzyme maturation, permease component	pfam12730===ABC2_membrane_4
8025827445	Ga0609718_09_100337_101176	ABC-type transporter Mla subunit MlaD	8025822726	Paenibacillus sp. ClWae2A	1	100337	101176		8025822734	COG1463===ABC-type transporter Mla maintaining outer membrane lipid asymmetry, periplasmic component MlaD	pfam00015===MCPsignal
8025824904	Ga0609718_02_991812_993350	ABC-type uncharacterized transport system ATPase subunit	8025822726	Paenibacillus sp. ClWae2A	1	991812	993350		8025822727	COG3845===ABC-type uncharacterized transport system, ATPase component	pfam00005===ABC_tran
8025828272	Ga0609718_14_46145_47644	ABC-type uncharacterized transport system ATPase subunit	8025822726	Paenibacillus sp. ClWae2A	1	46145	47644		8025822739	COG3845===ABC-type uncharacterized transport system, ATPase component	pfam00005===ABC_tran
8025826268	Ga0609718_05_112142_113536	ABC-type uncharacterized transport system involved in gliding motility auxiliary subunit	8025822726	Paenibacillus sp. ClWae2A	1	112142	113536		8025822730	COG3225===ABC-type uncharacterized transport system involved in gliding motility, auxiliary component	pfam09822===ABC_transp_aux
8025824903	Ga0609718_02_990740_991819	ABC-type uncharacterized transport system permease subunit	8025822726	Paenibacillus sp. ClWae2A	1	990740	991819		8025822727	COG4603===ABC-type uncharacterized transport system, permease component	pfam02653===BPD_transp_2
8025824902	Ga0609718_02_989777_990739	ABC-type uncharacterized transport system permease subunit	8025822726	Paenibacillus sp. ClWae2A	1	989777	990739		8025822727	COG1079===ABC-type uncharacterized transport system, permease component	pfam02653===BPD_transp_2
8025828270	Ga0609718_14_44174_45097	ABC-type uncharacterized transport system permease subunit	8025822726	Paenibacillus sp. ClWae2A	1	44174	45097		8025822739	COG1079===ABC-type uncharacterized transport system, permease component	pfam02653===BPD_transp_2
8025828271	Ga0609718_14_45081_46148	ABC-type uncharacterized transport system permease subunit	8025822726	Paenibacillus sp. ClWae2A	1	45081	46148		8025822739	COG4603===ABC-type uncharacterized transport system, permease component	pfam02653===BPD_transp_2
8025825840	Ga0609718_04_99471_100367	abortive infection bacteriophage resistance protein	8025822726	Paenibacillus sp. ClWae2A	1	99471	100367		8025822729	COG4823===Abortive infection bacteriophage resistance protein	pfam07751===Abi_2
8025828864	Ga0609718_20_33004_33546	AbrB family transcriptional regulator (stage V sporulation protein T)	8025822726	Paenibacillus sp. ClWae2A	1	33004	33546		8025822745	COG2002===Bifunctional DNA-binding transcriptional regulator of stationary/sporulation/toxin gene expression and antitoxin component of the YhaV-PrlF toxin-antitoxin module	pfam04014===MazE_antitoxin<<>>pfam15714===SpoVT_C
8025824378	Ga0609718_02_437972_439273	ACDE family multidrug resistance protein	8025822726	Paenibacillus sp. ClWae2A	1	437972	439273		8025822727	COG0477===MFS family permease	pfam07690===MFS_1
8025829198	Ga0609718_26_17544_18764	ACDE family multidrug resistance protein	8025822726	Paenibacillus sp. ClWae2A	1	17544	18764		8025822751	COG2814===Predicted arabinose efflux permease, MFS family	pfam07690===MFS_1
8025825175	Ga0609718_03_160260_162872	acetaldehyde dehydrogenase/alcohol dehydrogenase	8025822726	Paenibacillus sp. ClWae2A	1	160260	162872		8025822728	COG1454===Alcohol dehydrogenase, class IV<<>>COG1012===Acyl-CoA reductase or other NAD-dependent aldehyde dehydrogenase	pfam00171===Aldedh<<>>pfam00465===Fe-ADH
8025825630	Ga0609718_03_647432_648991	acetamidase/formamidase	8025822726	Paenibacillus sp. ClWae2A	1	647432	648991		8025822728	COG2421===Acetamidase/formamidase	pfam03069===FmdA_AmdA<<>>pfam07833===Cu_amine_oxidN1
8025824080	Ga0609718_02_146942_147877	acetamidase/formamidase	8025822726	Paenibacillus sp. ClWae2A	1	146942	147877		8025822727	COG2421===Acetamidase/formamidase	pfam03069===FmdA_AmdA
8025823855	Ga0609718_01_1331421_1332626	acetate kinase	8025822726	Paenibacillus sp. ClWae2A	1	1331421	1332626		8025822726	COG0282===Acetate kinase	pfam00871===Acetate_kinase
8025823167	Ga0609718_01_531929_532675	acetoacetate decarboxylase	8025822726	Paenibacillus sp. ClWae2A	1	531929	532675		8025822726	COG4689===Acetoacetate decarboxylase	pfam06314===ADC
8025825307	Ga0609718_03_309973_310605	acetoin utilization protein AcuA	8025822726	Paenibacillus sp. ClWae2A	1	309973	310605		8025822728	COG0454===N-acetyltransferase, GNAT superfamily (includes histone acetyltransferase HPA2)	pfam00583===Acetyltransf_1
8025824638	Ga0609718_02_740678_742309	acetolactate synthase-1/2/3 large subunit	8025822726	Paenibacillus sp. ClWae2A	1	740678	742309		8025822727	COG0028===Acetolactate synthase large subunit or other thiamine pyrophosphate-requiring enzyme	pfam00205===TPP_enzyme_M<<>>pfam02776===TPP_enzyme_N<<>>pfam02775===TPP_enzyme_C
8025824899	Ga0609718_02_986364_988115	acetolactate synthase-1/2/3 large subunit	8025822726	Paenibacillus sp. ClWae2A	1	986364	988115		8025822727	COG0028===Acetolactate synthase large subunit or other thiamine pyrophosphate-requiring enzyme	pfam00205===TPP_enzyme_M<<>>pfam02775===TPP_enzyme_C<<>>pfam02776===TPP_enzyme_N
8025824898	Ga0609718_02_985885_986367	acetolactate synthase-1/3 small subunit	8025822726	Paenibacillus sp. ClWae2A	1	985885	986367		8025822727	COG0440===Acetolactate synthase, small subunit	pfam10369===ALS_ss_C<<>>pfam13710===ACT_5
8025822963	Ga0609718_01_292935_293819	acetyl esterase	8025822726	Paenibacillus sp. ClWae2A	1	292935	293819		8025822726	COG0657===Acetyl esterase/lipase	pfam07859===Abhydrolase_3
8025826549	Ga0609718_06_46160_47185	acetyl esterase/lipase	8025822726	Paenibacillus sp. ClWae2A	1	46160	47185		8025822731	COG0657===Acetyl esterase/lipase	pfam07859===Abhydrolase_3
8025824441	Ga0609718_02_522594_523535	acetyl esterase/lipase	8025822726	Paenibacillus sp. ClWae2A	1	522594	523535		8025822727	COG0657===Acetyl esterase/lipase	pfam07859===Abhydrolase_3
8025824349	Ga0609718_02_402529_403317	acetyl esterase/lipase	8025822726	Paenibacillus sp. ClWae2A	1	402529	403317		8025822727	COG0657===Acetyl esterase/lipase	pfam07859===Abhydrolase_3
8025823308	Ga0609718_01_715593_716576	acetyl esterase/lipase	8025822726	Paenibacillus sp. ClWae2A	1	715593	716576		8025822726	COG0657===Acetyl esterase/lipase	pfam07859===Abhydrolase_3
8025825138	Ga0609718_03_119456_119926	acetyl-CoA carboxylase biotin carboxyl carrier protein	8025822726	Paenibacillus sp. ClWae2A	1	119456	119926		8025822728	COG0511===Biotin carboxyl carrier protein	pfam00364===Biotin_lipoyl
8025825137	Ga0609718_03_118057_119400	acetyl-CoA carboxylase biotin carboxylase subunit	8025822726	Paenibacillus sp. ClWae2A	1	118057	119400		8025822728	COG4770===Acetyl/propionyl-CoA carboxylase, alpha subunit	pfam02785===Biotin_carb_C<<>>pfam00289===Biotin_carb_N<<>>pfam02786===CPSase_L_D2
8025824611	Ga0609718_02_708595_709626	acetyl-CoA carboxylase carboxyl transferase subunit alpha	8025822726	Paenibacillus sp. ClWae2A	1	708595	709626		8025822727	COG0825===Acetyl-CoA carboxylase alpha subunit	pfam03255===ACCA
8025824612	Ga0609718_02_709627_710520	acetyl-CoA carboxylase carboxyl transferase subunit beta	8025822726	Paenibacillus sp. ClWae2A	1	709627	710520		8025822727	COG0777===Acetyl-CoA carboxylase beta subunit	pfam17848===zf-ACC<<>>pfam01039===Carboxyl_trans
8025825306	Ga0609718_03_307754_309478	acetyl-CoA synthetase	8025822726	Paenibacillus sp. ClWae2A	1	307754	309478		8025822728	COG0365===Acyl-coenzyme A synthetase/AMP-(fatty) acid ligase	pfam00501===AMP-binding<<>>pfam13193===AMP-binding_C
8025822762	Ga0609718_01_44126_45718	acetyl-CoA synthetase	8025822726	Paenibacillus sp. ClWae2A	1	44126	45718		8025822726	COG0365===Acyl-coenzyme A synthetase/AMP-(fatty) acid ligase	pfam00501===AMP-binding<<>>pfam13193===AMP-binding_C
8025826127	Ga0609718_04_421921_422760	acetylglutamate kinase	8025822726	Paenibacillus sp. ClWae2A	1	421921	422760		8025822729	COG0548===Acetylglutamate kinase	pfam00696===AA_kinase
8025826258	Ga0609718_05_102522_103877	acetylornithine deacetylase/succinyl-diaminopimelate desuccinylase-like protein	8025822726	Paenibacillus sp. ClWae2A	1	102522	103877		8025822730	COG0624===Acetylornithine deacetylase/Succinyl-diaminopimelate desuccinylase or related deacylase	pfam07687===M20_dimer<<>>pfam01546===Peptidase_M20
8025826128	Ga0609718_04_423119_424372	acetylornithine/N-succinyldiaminopimelate aminotransferase	8025822726	Paenibacillus sp. ClWae2A	1	423119	424372		8025822729	COG4992===Acetylornithine/succinyldiaminopimelate/putrescine aminotransferase	pfam00202===Aminotran_3
8025822869	Ga0609718_01_192598_193203	acetyltransferase-like isoleucine patch superfamily enzyme	8025822726	Paenibacillus sp. ClWae2A	1	192598	193203		8025822726	COG0110===Acetyltransferase (isoleucine patch superfamily)	pfam12464===Mac<<>>pfam14602===Hexapep_2
8025828209	Ga0609718_13_165423_165983	acetyltransferase-like isoleucine patch superfamily enzyme	8025822726	Paenibacillus sp. ClWae2A	1	165423	165983		8025822738	COG0110===Acetyltransferase (isoleucine patch superfamily)	pfam14602===Hexapep_2
8025828037	Ga0609718_12_177943_178485	acetyltransferase-like isoleucine patch superfamily enzyme	8025822726	Paenibacillus sp. ClWae2A	1	177943	178485		8025822737	COG0110===Acetyltransferase (isoleucine patch superfamily)	pfam14602===Hexapep_2
8025828647	Ga0609718_17_39473_42187	aconitate hydratase	8025822726	Paenibacillus sp. ClWae2A	1	39473	42187		8025822742	COG1048===Aconitase A	pfam00694===Aconitase_C<<>>pfam00330===Aconitase
8025828103	Ga0609718_13_52887_53852	ACR3 family arsenite transporter	8025822726	Paenibacillus sp. ClWae2A	1	52887	53852		8025822738	COG0798===Arsenite efflux pump ArsB, ACR3 family	pfam01758===SBF
8025823698	Ga0609718_01_1133455_1134036	AcrR family transcriptional regulator	8025822726	Paenibacillus sp. ClWae2A	1	1133455	1134036		8025822726	COG1309===DNA-binding transcriptional regulator, AcrR family	pfam00440===TetR_N
8025825957	Ga0609718_04_254165_254788	AcrR family transcriptional regulator	8025822726	Paenibacillus sp. ClWae2A	1	254165	254788		8025822729	COG1309===DNA-binding transcriptional regulator, AcrR family	pfam00440===TetR_N
8025826862	Ga0609718_07_77641_78243	AcrR family transcriptional regulator	8025822726	Paenibacillus sp. ClWae2A	1	77641	78243		8025822732	COG1309===DNA-binding transcriptional regulator, AcrR family	pfam00440===TetR_N<<>>pfam13305===TetR_C_33
8025827518	Ga0609718_09_180731_181390	AcrR family transcriptional regulator	8025822726	Paenibacillus sp. ClWae2A	1	180731	181390		8025822734	COG1309===DNA-binding transcriptional regulator, AcrR family	pfam00440===TetR_N<<>>pfam13305===TetR_C_33
8025828897	Ga0609718_20_67116_67712	AcrR family transcriptional regulator	8025822726	Paenibacillus sp. ClWae2A	1	67116	67712		8025822745	COG1309===DNA-binding transcriptional regulator, AcrR family	pfam13977===TetR_C_6<<>>pfam00440===TetR_N
8025823392	Ga0609718_01_808803_809384	AcrR family transcriptional regulator	8025822726	Paenibacillus sp. ClWae2A	1	808803	809384		8025822726	COG1309===DNA-binding transcriptional regulator, AcrR family	pfam00440===TetR_N
8025828259	Ga0609718_14_34618_35217	AcrR family transcriptional regulator	8025822726	Paenibacillus sp. ClWae2A	1	34618	35217		8025822739	COG1309===DNA-binding transcriptional regulator, AcrR family	pfam00440===TetR_N<<>>pfam17938===TetR_C_29
8025828195	Ga0609718_13_149591_150163	AcrR family transcriptional regulator	8025822726	Paenibacillus sp. ClWae2A	1	149591	150163		8025822738	COG1309===DNA-binding transcriptional regulator, AcrR family	pfam00440===TetR_N<<>>pfam13305===TetR_C_33
8025823045	Ga0609718_01_380634_381527	AcrR family transcriptional regulator	8025822726	Paenibacillus sp. ClWae2A	1	380634	381527		8025822726	COG1309===DNA-binding transcriptional regulator, AcrR family	pfam00440===TetR_N
8025823761	Ga0609718_01_1221900_1222508	AcrR family transcriptional regulator	8025822726	Paenibacillus sp. ClWae2A	1	1221900	1222508		8025822726	COG1309===DNA-binding transcriptional regulator, AcrR family	pfam13977===TetR_C_6<<>>pfam00440===TetR_N
8025822939	Ga0609718_01_267826_268431	AcrR family transcriptional regulator	8025822726	Paenibacillus sp. ClWae2A	1	267826	268431		8025822726	COG1309===DNA-binding transcriptional regulator, AcrR family	pfam14278===TetR_C_8<<>>pfam00440===TetR_N
8025827316	Ga0609718_08_249637_250248	AcrR family transcriptional regulator	8025822726	Paenibacillus sp. ClWae2A	1	249637	250248		8025822733	COG1309===DNA-binding transcriptional regulator, AcrR family	pfam00440===TetR_N
8025827457	Ga0609718_09_112967_113605	AcrR family transcriptional regulator	8025822726	Paenibacillus sp. ClWae2A	1	112967	113605		8025822734	COG1309===DNA-binding transcriptional regulator, AcrR family	pfam00440===TetR_N<<>>pfam14278===TetR_C_8
8025824567	Ga0609718_02_651597_652118	AcrR family transcriptional regulator	8025822726	Paenibacillus sp. ClWae2A	1	651597	652118		8025822727	COG1309===DNA-binding transcriptional regulator, AcrR family	pfam00440===TetR_N
8025827607	Ga0609718_10_50559_51128	AcrR family transcriptional regulator	8025822726	Paenibacillus sp. ClWae2A	1	50559	51128		8025822735	COG1309===DNA-binding transcriptional regulator, AcrR family	pfam14278===TetR_C_8<<>>pfam00440===TetR_N
8025823282	Ga0609718_01_671947_672561	AcrR family transcriptional regulator	8025822726	Paenibacillus sp. ClWae2A	1	671947	672561		8025822726	COG1309===DNA-binding transcriptional regulator, AcrR family	pfam00440===TetR_N<<>>pfam14278===TetR_C_8
8025826708	Ga0609718_06_231846_232439	AcrR family transcriptional regulator	8025822726	Paenibacillus sp. ClWae2A	1	231846	232439		8025822731	COG1309===DNA-binding transcriptional regulator, AcrR family	pfam00440===TetR_N<<>>pfam14278===TetR_C_8
8025823211	Ga0609718_01_578547_579206	AcrR family transcriptional regulator	8025822726	Paenibacillus sp. ClWae2A	1	578547	579206		8025822726	COG1309===DNA-binding transcriptional regulator, AcrR family	pfam00440===TetR_N
8025827364	Ga0609718_09_11928_12500	AcrR family transcriptional regulator	8025822726	Paenibacillus sp. ClWae2A	1	11928	12500		8025822734	COG1309===DNA-binding transcriptional regulator, AcrR family
8025828459	Ga0609718_15_60049_60681	AcrR family transcriptional regulator	8025822726	Paenibacillus sp. ClWae2A	1	60049	60681		8025822740	COG1309===DNA-binding transcriptional regulator, AcrR family	pfam00440===TetR_N<<>>pfam08361===TetR_C_2
8025825671	Ga0609718_03_702013_702576	AcrR family transcriptional regulator	8025822726	Paenibacillus sp. ClWae2A	1	702013	702576		8025822728	COG1309===DNA-binding transcriptional regulator, AcrR family	pfam00440===TetR_N
8025823134	Ga0609718_01_492723_493367	AcrR family transcriptional regulator	8025822726	Paenibacillus sp. ClWae2A	1	492723	493367		8025822726	COG1309===DNA-binding transcriptional regulator, AcrR family	pfam00440===TetR_N
8025826847	Ga0609718_07_64159_64728	AcrR family transcriptional regulator	8025822726	Paenibacillus sp. ClWae2A	1	64159	64728		8025822732	COG1309===DNA-binding transcriptional regulator, AcrR family
8025827396	Ga0609718_09_43504_44136	AcrR family transcriptional regulator	8025822726	Paenibacillus sp. ClWae2A	1	43504	44136		8025822734	COG1309===DNA-binding transcriptional regulator, AcrR family	pfam00440===TetR_N
8025828616	Ga0609718_17_12075_12755	AcrR family transcriptional regulator	8025822726	Paenibacillus sp. ClWae2A	1	12075	12755		8025822742	COG1309===DNA-binding transcriptional regulator, AcrR family	pfam00440===TetR_N
8025825953	Ga0609718_04_252007_252954	AcrR family transcriptional regulator	8025822726	Paenibacillus sp. ClWae2A	1	252007	252954		8025822729	COG1309===DNA-binding transcriptional regulator, AcrR family	pfam00440===TetR_N
8025823409	Ga0609718_01_825474_826043	AcrR family transcriptional regulator	8025822726	Paenibacillus sp. ClWae2A	1	825474	826043		8025822726	COG1309===DNA-binding transcriptional regulator, AcrR family	pfam14278===TetR_C_8<<>>pfam00440===TetR_N
8025823303	Ga0609718_01_706727_707287	AcrR family transcriptional regulator	8025822726	Paenibacillus sp. ClWae2A	1	706727	707287		8025822726	COG1309===DNA-binding transcriptional regulator, AcrR family	pfam00440===TetR_N
8025823044	Ga0609718_01_379750_380397	AcrR family transcriptional regulator	8025822726	Paenibacillus sp. ClWae2A	1	379750	380397		8025822726	COG1309===DNA-binding transcriptional regulator, AcrR family	pfam00440===TetR_N
8025823399	Ga0609718_01_815125_815709	AcrR family transcriptional regulator	8025822726	Paenibacillus sp. ClWae2A	1	815125	815709		8025822726	COG1309===DNA-binding transcriptional regulator, AcrR family	pfam14278===TetR_C_8<<>>pfam00440===TetR_N
8025827732	Ga0609718_10_203064_203669	AcrR family transcriptional regulator	8025822726	Paenibacillus sp. ClWae2A	1	203064	203669		8025822735	COG1309===DNA-binding transcriptional regulator, AcrR family	pfam08360===TetR_C_5<<>>pfam00440===TetR_N
8025825570	Ga0609718_03_578746_579381	AcrR family transcriptional regulator	8025822726	Paenibacillus sp. ClWae2A	1	578746	579381		8025822728	COG1309===DNA-binding transcriptional regulator, AcrR family	pfam00440===TetR_N
8025822910	Ga0609718_01_241572_242138	AcrR family transcriptional regulator	8025822726	Paenibacillus sp. ClWae2A	1	241572	242138		8025822726	COG1309===DNA-binding transcriptional regulator, AcrR family	pfam00440===TetR_N
8025828319	Ga0609718_14_97037_97615	AcrR family transcriptional regulator	8025822726	Paenibacillus sp. ClWae2A	1	97037	97615		8025822739	COG1309===DNA-binding transcriptional regulator, AcrR family	pfam00440===TetR_N<<>>pfam16859===TetR_C_11
8025824192	Ga0609718_02_238990_240009	acrylyl-CoA reductase (NADPH)	8025822726	Paenibacillus sp. ClWae2A	1	238990	240009		8025822727	COG0604===NADPH:quinone reductase or related Zn-dependent oxidoreductase	pfam00107===ADH_zinc_N
8025824989	Ga0609718_02_1073468_1075435	activator of the mannose operon (transcriptional antiterminator)	8025822726	Paenibacillus sp. ClWae2A	1	1073468	1075435		8025822727	COG4668===Mannitol/fructose-specific phosphotransferase system, IIA domain<<>>COG3711===Transcriptional antiterminator	pfam08279===HTH_11<<>>pfam05043===Mga<<>>pfam00874===PRD<<>>pfam00359===PTS_EIIA_2
8025824321	Ga0609718_02_372260_372493	acyl carrier protein	8025822726	Paenibacillus sp. ClWae2A	1	372260	372493		8025822727	COG0236===Acyl carrier protein	pfam00550===PP-binding
8025827683	Ga0609718_10_147733_148038	acyl carrier protein	8025822726	Paenibacillus sp. ClWae2A	1	147733	148038		8025822735	COG0236===Acyl carrier protein	pfam00550===PP-binding
8025827617	Ga0609718_10_62560_62811	acyl carrier protein	8025822726	Paenibacillus sp. ClWae2A	1	62560	62811		8025822735	COG0236===Acyl carrier protein	pfam00550===PP-binding
8025828137	Ga0609718_13_88884_89150	acyl carrier protein	8025822726	Paenibacillus sp. ClWae2A	1	88884	89150		8025822738	COG0236===Acyl carrier protein	pfam00550===PP-binding
8025828184	Ga0609718_13_139961_140221	acyl carrier protein	8025822726	Paenibacillus sp. ClWae2A	1	139961	140221		8025822738	COG0236===Acyl carrier protein	pfam00550===PP-binding
8025822968	Ga0609718_01_298508_298933	acyl dehydratase	8025822726	Paenibacillus sp. ClWae2A	1	298508	298933		8025822726	COG2030===Acyl dehydratase	pfam01575===MaoC_dehydratas
8025828133	Ga0609718_13_85134_86291	acyl-CoA dehydrogenase	8025822726	Paenibacillus sp. ClWae2A	1	85134	86291		8025822738	COG1960===Acyl-CoA dehydrogenase related to the alkylation response protein AidB	pfam02770===Acyl-CoA_dh_M<<>>pfam00441===Acyl-CoA_dh_1<<>>pfam02771===Acyl-CoA_dh_N
8025827450	Ga0609718_09_105606_106154	acyl-CoA hydrolase	8025822726	Paenibacillus sp. ClWae2A	1	105606	106154		8025822734	COG1607===Acyl-CoA hydrolase	pfam03061===4HBT
8025829201	Ga0609718_26_20050_20868	acyl-CoA reductase-like NAD-dependent aldehyde dehydrogenase	8025822726	Paenibacillus sp. ClWae2A	1	20050	20868		8025822751	COG1012===Acyl-CoA reductase or other NAD-dependent aldehyde dehydrogenase	pfam00171===Aldedh
8025827808	Ga0609718_11_79108_80598	acyl-CoA reductase-like NAD-dependent aldehyde dehydrogenase	8025822726	Paenibacillus sp. ClWae2A	1	79108	80598		8025822736	COG1012===Acyl-CoA reductase or other NAD-dependent aldehyde dehydrogenase	pfam00171===Aldedh
8025823278	Ga0609718_01_665794_667260	acyl-CoA reductase-like NAD-dependent aldehyde dehydrogenase	8025822726	Paenibacillus sp. ClWae2A	1	665794	667260		8025822726	COG1012===Acyl-CoA reductase or other NAD-dependent aldehyde dehydrogenase	pfam00171===Aldedh
8025829200	Ga0609718_26_19446_20063	acyl-CoA reductase-like NAD-dependent aldehyde dehydrogenase	8025822726	Paenibacillus sp. ClWae2A	1	19446	20063		8025822751	COG1012===Acyl-CoA reductase or other NAD-dependent aldehyde dehydrogenase	pfam00171===Aldedh
8025824609	Ga0609718_02_706424_706930	acyl-CoA thioester hydrolase	8025822726	Paenibacillus sp. ClWae2A	1	706424	706930		8025822727	COG0824===Acyl-CoA thioesterase FadM	pfam03061===4HBT
8025824326	Ga0609718_02_376563_377165	acyl-coenzyme A thioesterase PaaI-like protein	8025822726	Paenibacillus sp. ClWae2A	1	376563	377165		8025822727	COG2050===Acyl-coenzyme A thioesterase PaaI, contains HGG motif	pfam08220===HTH_DeoR
8025823932	Ga0609718_01_1401646_1402260	adapter protein MecA 1/2	8025822726	Paenibacillus sp. ClWae2A	1	1401646	1402260		8025822726	COG4862===Negative regulator of genetic competence, sporulation and motility	pfam05389===MecA
8025825826	Ga0609718_04_86386_88125	adenine deaminase	8025822726	Paenibacillus sp. ClWae2A	1	86386	88125		8025822729	COG1001===Adenine deaminase	pfam01979===Amidohydro_1<<>>pfam13382===Adenine_deam_C
8025824384	Ga0609718_02_445488_447347	adenine deaminase	8025822726	Paenibacillus sp. ClWae2A	1	445488	447347		8025822727	COG1001===Adenine deaminase	pfam13382===Adenine_deam_C<<>>pfam01979===Amidohydro_1
8025827121	Ga0609718_08_17778_18290	adenine phosphoribosyltransferase	8025822726	Paenibacillus sp. ClWae2A	1	17778	18290		8025822733	COG0503===Adenine/guanine phosphoribosyltransferase or related PRPP-binding protein	pfam00156===Pribosyltran
8025826841	Ga0609718_07_57855_58685	adenosylcobinamide hydrolase	8025822726	Paenibacillus sp. ClWae2A	1	57855	58685		8025822732	COG1865===Adenosylcobinamide amidohydrolase	pfam01955===CbiZ
8025826833	Ga0609718_07_50865_51425	adenosylcobinamide kinase/adenosylcobinamide-phosphate guanylyltransferase	8025822726	Paenibacillus sp. ClWae2A	1	50865	51425		8025822732	COG2087===Adenosyl cobinamide kinase/adenosyl cobinamide phosphate guanylyltransferase	pfam02283===CobU
8025824867	Ga0609718_02_948795_949337	adenosylcobinamide kinase/adenosylcobinamide-phosphate guanylyltransferase	8025822726	Paenibacillus sp. ClWae2A	1	948795	949337		8025822727	COG2087===Adenosyl cobinamide kinase/adenosyl cobinamide phosphate guanylyltransferase	pfam02283===CobU
8025826832	Ga0609718_07_49978_50868	adenosylcobinamide-GDP ribazoletransferase	8025822726	Paenibacillus sp. ClWae2A	1	49978	50868		8025822732	COG0368===Cobalamin synthase	pfam02654===CobS
8025826840	Ga0609718_07_56830_57882	adenosylcobinamide-phosphate synthase	8025822726	Paenibacillus sp. ClWae2A	1	56830	57882		8025822732	COG1270===Cobalamin biosynthesis protein CobD/CbiB	pfam03186===CobD_Cbib
8025826831	Ga0609718_07_48307_49887	adenosylcobyric acid synthase	8025822726	Paenibacillus sp. ClWae2A	1	48307	49887		8025822732	COG1492===Cobyric acid synthase	pfam13500===AAA_26<<>>pfam07685===GATase_3
8025825430	Ga0609718_03_427505_428770	adenosylhomocysteinase	8025822726	Paenibacillus sp. ClWae2A	1	427505	428770		8025822728	COG0499===S-adenosylhomocysteine hydrolase	pfam05221===AdoHcyase<<>>pfam00670===AdoHcyase_NAD
8025825308	Ga0609718_03_310716_311411	adenosylhomocysteine nucleosidase	8025822726	Paenibacillus sp. ClWae2A	1	310716	311411		8025822728	COG0775===Nucleoside phosphorylase	pfam01048===PNP_UDP_1
8025828973	Ga0609718_22_14559_15203	adenylate kinase	8025822726	Paenibacillus sp. ClWae2A	1	14559	15203		8025822747	COG0563===Adenylate kinase or related kinase	pfam05191===ADK_lid<<>>pfam00406===ADK
8025824134	Ga0609718_02_182682_183203	adenylate kinase family enzyme	8025822726	Paenibacillus sp. ClWae2A	1	182682	183203		8025822727	COG0563===Adenylate kinase or related kinase
8025824056	Ga0609718_02_125509_126078	adenylate kinase family enzyme	8025822726	Paenibacillus sp. ClWae2A	1	125509	126078		8025822727	COG0563===Adenylate kinase or related kinase
8025827572	Ga0609718_10_10225_11523	adenylosuccinate lyase	8025822726	Paenibacillus sp. ClWae2A	1	10225	11523		8025822735	COG0015===Adenylosuccinate lyase	pfam00206===Lyase_1<<>>pfam10397===ADSL_C
8025827786	Ga0609718_11_54498_55784	adenylosuccinate synthase	8025822726	Paenibacillus sp. ClWae2A	1	54498	55784		8025822736	COG0104===Adenylosuccinate synthase	pfam00709===Adenylsucc_synt
8025824789	Ga0609718_02_859784_860422	adenylylsulfate kinase	8025822726	Paenibacillus sp. ClWae2A	1	859784	860422		8025822727	COG0529===Adenylylsulfate kinase or related kinase	pfam01583===APS_kinase
8025825102	Ga0609718_03_83413_84006	ADP-ribose pyrophosphatase	8025822726	Paenibacillus sp. ClWae2A	1	83413	84006		8025822728	COG0494===8-oxo-dGTP pyrophosphatase MutT and related house-cleaning NTP pyrophosphohydrolases, NUDIX family	pfam00293===NUDIX
8025824103	Ga0609718_02_160002_160463	ADP-ribose pyrophosphatase YjhB (NUDIX family)	8025822726	Paenibacillus sp. ClWae2A	1	160002	160463		8025822727	COG1051===ADP-ribose pyrophosphatase YjhB, NUDIX family	pfam00293===NUDIX
8025825619	Ga0609718_03_631562_632488	ADP-ribosyl-[dinitrogen reductase] hydrolase	8025822726	Paenibacillus sp. ClWae2A	1	631562	632488		8025822728	COG1397===ADP-ribosylglycohydrolase	pfam03747===ADP_ribosyl_GH
8025828750	Ga0609718_18_72180_73535	aerobic C4-dicarboxylate transport protein	8025822726	Paenibacillus sp. ClWae2A	1	72180	73535		8025822743	COG1301===Na+/H+-dicarboxylate symporter	pfam00375===SDF
8025829060	Ga0609718_23_26625_27494	agmatinase	8025822726	Paenibacillus sp. ClWae2A	1	26625	27494		8025822748	COG0010===Arginase family enzyme	pfam00491===Arginase
8025828689	Ga0609718_17_88047_89423	AGZA family xanthine/uracil permease-like MFS transporter	8025822726	Paenibacillus sp. ClWae2A	1	88047	89423		8025822742	COG2252===Xanthine/uracil/vitamin C permease, AzgA family	pfam00860===Xan_ur_permease
8025827132	Ga0609718_08_31554_32852	AGZA family xanthine/uracil permease-like MFS transporter	8025822726	Paenibacillus sp. ClWae2A	1	31554	32852		8025822733	COG2252===Xanthine/uracil/vitamin C permease, AzgA family	pfam00860===Xan_ur_permease
8025823226	Ga0609718_01_598888_600186	AGZA family xanthine/uracil permease-like MFS transporter	8025822726	Paenibacillus sp. ClWae2A	1	598888	600186		8025822726	COG2252===Xanthine/uracil/vitamin C permease, AzgA family	pfam00860===Xan_ur_permease
8025824846	Ga0609718_02_925752_927038	AGZA family xanthine/uracil permease-like MFS transporter	8025822726	Paenibacillus sp. ClWae2A	1	925752	927038		8025822727	COG2252===Xanthine/uracil/vitamin C permease, AzgA family	pfam00860===Xan_ur_permease
8025824452	Ga0609718_02_533965_534294	AhpD family alkylhydroperoxidase	8025822726	Paenibacillus sp. ClWae2A	1	533965	534294		8025822727	COG0599===Uncharacterized conserved protein YurZ, alkylhydroperoxidase/carboxymuconolactone decarboxylase family	pfam02627===CMD
8025823768	Ga0609718_01_1228315_1228761	AhpD family alkylhydroperoxidase	8025822726	Paenibacillus sp. ClWae2A	1	1228315	1228761		8025822726	COG2128===Alkylhydroperoxidase family enzyme, contains CxxC motif	pfam02627===CMD
8025827097	Ga0609718_07_318786_319274	Ala-tRNA(Pro) deacylase	8025822726	Paenibacillus sp. ClWae2A	1	318786	319274		8025822732	COG3760===Uncharacterized protein	pfam04073===tRNA_edit
8025826511	Ga0609718_06_7366_8499	alanine dehydrogenase	8025822726	Paenibacillus sp. ClWae2A	1	7366	8499		8025822731	COG0686===Alanine dehydrogenase	pfam01262===AlaDh_PNT_C<<>>pfam05222===AlaDh_PNT_N
8025826928	Ga0609718_07_132371_133558	alanine racemase	8025822726	Paenibacillus sp. ClWae2A	1	132371	133558		8025822732	COG0787===Alanine racemase	pfam00842===Ala_racemase_C<<>>pfam01168===Ala_racemase_N
8025827151	Ga0609718_08_50493_53114	alanyl-tRNA synthetase	8025822726	Paenibacillus sp. ClWae2A	1	50493	53114		8025822733	COG0013===Alanyl-tRNA synthetase	pfam01411===tRNA-synt_2c<<>>pfam02272===DHHA1<<>>pfam07973===tRNA_SAD
8025826728	Ga0609718_06_254082_255260	alanyl-tRNA synthetase	8025822726	Paenibacillus sp. ClWae2A	1	254082	255260		8025822731	COG2872===Ser-tRNA(Ala) deacylase AlaX (editing enzyme)	pfam07973===tRNA_SAD
8025823943	Ga0609718_02_1135_2286	alcohol dehydrogenase	8025822726	Paenibacillus sp. ClWae2A	1	1135	2286		8025822727	COG1454===Alcohol dehydrogenase, class IV	pfam00465===Fe-ADH
8025827177	Ga0609718_08_80308_81471	alcohol dehydrogenase YqhD (iron-dependent ADH family)	8025822726	Paenibacillus sp. ClWae2A	1	80308	81471		8025822733	COG1979===Alcohol dehydrogenase YqhD, Fe-dependent ADH family	pfam00465===Fe-ADH
8025827334	Ga0609718_08_266577_267740	alcohol dehydrogenase YqhD (iron-dependent ADH family)	8025822726	Paenibacillus sp. ClWae2A	1	266577	267740		8025822733	COG1979===Alcohol dehydrogenase YqhD, Fe-dependent ADH family	pfam00465===Fe-ADH
8025824170	Ga0609718_02_218036_219511	aldehyde dehydrogenase (NAD+)	8025822726	Paenibacillus sp. ClWae2A	1	218036	219511		8025822727	COG1012===Acyl-CoA reductase or other NAD-dependent aldehyde dehydrogenase	pfam00171===Aldedh
8025823455	Ga0609718_01_872834_874237	aldehyde dehydrogenase (NAD+)	8025822726	Paenibacillus sp. ClWae2A	1	872834	874237		8025822726	COG1012===Acyl-CoA reductase or other NAD-dependent aldehyde dehydrogenase	pfam00171===Aldedh
8025823658	Ga0609718_01_1091686_1092987	aldehyde dehydrogenase (NAD+)	8025822726	Paenibacillus sp. ClWae2A	1	1091686	1092987		8025822726	COG1012===Acyl-CoA reductase or other NAD-dependent aldehyde dehydrogenase	pfam00171===Aldedh
8025823521	Ga0609718_01_950456_951466	aldose 1-epimerase	8025822726	Paenibacillus sp. ClWae2A	1	950456	951466		8025822726	COG2017===Galactose mutarotase or related enzyme	pfam01263===Aldose_epim
8025826435	Ga0609718_05_301541_302515	aldose 1-epimerase	8025822726	Paenibacillus sp. ClWae2A	1	301541	302515		8025822730	COG2017===Galactose mutarotase or related enzyme	pfam01263===Aldose_epim
8025823375	Ga0609718_01_787689_789092	alginate O-acetyltransferase complex protein AlgI	8025822726	Paenibacillus sp. ClWae2A	1	787689	789092		8025822726	COG1696===D-alanyl-lipoteichoic acid acyltransferase DltB, MBOAT superfamily	pfam03062===MBOAT
8025823266	Ga0609718_01_650522_651880	alkaline phosphatase	8025822726	Paenibacillus sp. ClWae2A	1	650522	651880		8025822726	COG1785===Alkaline phosphatase	pfam00245===Alk_phosphatase
8025825683	Ga0609718_03_717172_718824	alkaline phosphatase	8025822726	Paenibacillus sp. ClWae2A	1	717172	718824		8025822728	COG1785===Alkaline phosphatase	pfam07833===Cu_amine_oxidN1<<>>pfam00245===Alk_phosphatase
8025825238	Ga0609718_03_223502_224704	alkanesulfonate monooxygenase	8025822726	Paenibacillus sp. ClWae2A	1	223502	224704		8025822728	COG2141===Flavin-dependent oxidoreductase, luciferase family (includes alkanesulfonate monooxygenase SsuD and methylene tetrahydromethanopterin reductase)	pfam00296===Bac_luciferase
8025828318	Ga0609718_14_95812_96936	alkanesulfonate monooxygenase SsuD/methylene tetrahydromethanopterin reductase-like flavin-dependent oxidoreductase (luciferase family)	8025822726	Paenibacillus sp. ClWae2A	1	95812	96936		8025822739	COG2141===Flavin-dependent oxidoreductase, luciferase family (includes alkanesulfonate monooxygenase SsuD and methylene tetrahydromethanopterin reductase)	pfam00296===Bac_luciferase
8025828186	Ga0609718_13_141374_142516	alkylation response protein AidB-like acyl-CoA dehydrogenase	8025822726	Paenibacillus sp. ClWae2A	1	141374	142516		8025822738	COG1960===Acyl-CoA dehydrogenase related to the alkylation response protein AidB	pfam00441===Acyl-CoA_dh_1
8025823394	Ga0609718_01_809600_809731	alkylhydroperoxidase/carboxymuconolactone decarboxylase family protein YurZ	8025822726	Paenibacillus sp. ClWae2A	1	809600	809731		8025822726	COG0599===Uncharacterized conserved protein YurZ, alkylhydroperoxidase/carboxymuconolactone decarboxylase family
8025823514	Ga0609718_01_939294_940601	allantoate deiminase	8025822726	Paenibacillus sp. ClWae2A	1	939294	940601		8025822726	COG0624===Acetylornithine deacetylase/Succinyl-diaminopimelate desuccinylase or related deacylase	pfam01546===Peptidase_M20<<>>pfam07687===M20_dimer
8025825945	Ga0609718_04_239808_241097	allantoate deiminase	8025822726	Paenibacillus sp. ClWae2A	1	239808	241097		8025822729	COG0624===Acetylornithine deacetylase/Succinyl-diaminopimelate desuccinylase or related deacylase	pfam07687===M20_dimer<<>>pfam01546===Peptidase_M20
8025823515	Ga0609718_01_940598_942001	allantoinase	8025822726	Paenibacillus sp. ClWae2A	1	940598	942001		8025822726	COG0044===Dihydroorotase or related cyclic amidohydrolase	pfam01979===Amidohydro_1
8025824043	Ga0609718_02_114757_115662	alpha-1,4-digalacturonate transport system permease protein	8025822726	Paenibacillus sp. ClWae2A	1	114757	115662		8025822727	COG1175===ABC-type sugar transport system, permease component	pfam00528===BPD_transp_1
8025824042	Ga0609718_02_113933_114757	alpha-1,4-digalacturonate transport system permease protein	8025822726	Paenibacillus sp. ClWae2A	1	113933	114757		8025822727	COG0395===ABC-type glycerol-3-phosphate transport system, permease component	pfam00528===BPD_transp_1
8025824044	Ga0609718_02_115754_117025	alpha-1,4-digalacturonate transport system substrate-binding protein	8025822726	Paenibacillus sp. ClWae2A	1	115754	117025		8025822727	COG1653===ABC-type glycerol-3-phosphate transport system, periplasmic component	pfam13416===SBP_bac_8
8025825795	Ga0609718_04_47531_49012	alpha-amylase	8025822726	Paenibacillus sp. ClWae2A	1	47531	49012		8025822729	COG0366===Glycosidase	pfam09154===DUF1939<<>>pfam00128===Alpha-amylase
8025824921	Ga0609718_02_1011084_1012064	alpha-beta hydrolase superfamily lysophospholipase	8025822726	Paenibacillus sp. ClWae2A	1	1011084	1012064		8025822727	COG2267===Lysophospholipase, alpha-beta hydrolase superfamily	pfam12146===Hydrolase_4
8025824578	Ga0609718_02_662115_662924	alpha-beta hydrolase superfamily lysophospholipase	8025822726	Paenibacillus sp. ClWae2A	1	662115	662924		8025822727	COG2267===Lysophospholipase, alpha-beta hydrolase superfamily	pfam12146===Hydrolase_4
8025825723	Ga0609718_03_757576_758523	alpha-beta hydrolase superfamily lysophospholipase	8025822726	Paenibacillus sp. ClWae2A	1	757576	758523		8025822728	COG2267===Lysophospholipase, alpha-beta hydrolase superfamily	pfam12146===Hydrolase_4
8025824381	Ga0609718_02_440604_442922	alpha-D-xyloside xylohydrolase	8025822726	Paenibacillus sp. ClWae2A	1	440604	442922		8025822727	COG1501===Alpha-glucosidase, glycosyl hydrolase family GH31	pfam01055===Glyco_hydro_31<<>>pfam13802===Gal_mutarotas_2
8025823075	Ga0609718_01_412287_413567	alpha-galactosidase	8025822726	Paenibacillus sp. ClWae2A	1	412287	413567		8025822726		pfam17801===Melibiase_C<<>>pfam16499===Melibiase_2
8025826925	Ga0609718_07_129051_131240	alpha-galactosidase	8025822726	Paenibacillus sp. ClWae2A	1	129051	131240		8025822732	COG3345===Alpha-galactosidase	pfam16874===Glyco_hydro_36C<<>>pfam16875===Glyco_hydro_36N<<>>pfam02065===Melibiase
8025827649	Ga0609718_10_100442_101611	alpha-galactosidase	8025822726	Paenibacillus sp. ClWae2A	1	100442	101611		8025822735		pfam16499===Melibiase_2<<>>pfam17801===Melibiase_C
8025826599	Ga0609718_06_105375_106880	alpha-galactosidase	8025822726	Paenibacillus sp. ClWae2A	1	105375	106880		8025822731	COG1486===Alpha-galactosidase/6-phospho-beta-glucosidase, family 4 of glycosyl hydrolase	pfam11975===Glyco_hydro_4C<<>>pfam02056===Glyco_hydro_4
8025827925	Ga0609718_12_38239_39540	alpha-galactosidase	8025822726	Paenibacillus sp. ClWae2A	1	38239	39540		8025822737	COG1486===Alpha-galactosidase/6-phospho-beta-glucosidase, family 4 of glycosyl hydrolase	pfam11975===Glyco_hydro_4C<<>>pfam02056===Glyco_hydro_4
8025823165	Ga0609718_01_529196_530602	alpha-galactosidase/6-phospho-beta-glucosidase family protein	8025822726	Paenibacillus sp. ClWae2A	1	529196	530602		8025822726	COG1486===Alpha-galactosidase/6-phospho-beta-glucosidase, family 4 of glycosyl hydrolase	pfam02056===Glyco_hydro_4<<>>pfam11975===Glyco_hydro_4C
8025823292	Ga0609718_01_689994_691661	alpha-glucosidase	8025822726	Paenibacillus sp. ClWae2A	1	689994	691661		8025822726	COG0366===Glycosidase	pfam16657===Malt_amylase_C<<>>pfam00128===Alpha-amylase
8025824100	Ga0609718_02_158372_158722	alpha-glucuronidase	8025822726	Paenibacillus sp. ClWae2A	1	158372	158722		8025822727	COG3661===Alpha-glucuronidase
8025823452	Ga0609718_01_867198_869339	alpha-glucuronidase	8025822726	Paenibacillus sp. ClWae2A	1	867198	869339		8025822726	COG3661===Alpha-glucuronidase	pfam03648===Glyco_hydro_67N<<>>pfam07488===Glyco_hydro_67M<<>>pfam07477===Glyco_hydro_67C
8025827345	Ga0609718_08_281544_282530	alpha-ketoglutarate-dependent taurine dioxygenase	8025822726	Paenibacillus sp. ClWae2A	1	281544	282530		8025822733	COG2175===Taurine dioxygenase, alpha-ketoglutarate-dependent	pfam02668===TauD
8025827716	Ga0609718_10_182407_183429	alpha-ketoglutarate-dependent taurine dioxygenase	8025822726	Paenibacillus sp. ClWae2A	1	182407	183429		8025822735	COG2175===Taurine dioxygenase, alpha-ketoglutarate-dependent	pfam02668===TauD
8025822864	Ga0609718_01_183863_187603	alpha-L-arabinofuranosidase	8025822726	Paenibacillus sp. ClWae2A	1	183863	187603		8025822726	COG3534===Alpha-L-arabinofuranosidase	pfam06964===Alpha-L-AF_C<<>>pfam13385===Laminin_G_3
8025827952	Ga0609718_12_75335_76060	alpha-L-fucosidase	8025822726	Paenibacillus sp. ClWae2A	1	75335	76060		8025822737	COG3669===Alpha-L-fucosidase	pfam01120===Alpha_L_fucos
8025827947	Ga0609718_12_68507_69919	alpha-L-fucosidase	8025822726	Paenibacillus sp. ClWae2A	1	68507	69919		8025822737	COG3669===Alpha-L-fucosidase	pfam01120===Alpha_L_fucos
8025823262	Ga0609718_01_645154_646587	alpha-L-fucosidase	8025822726	Paenibacillus sp. ClWae2A	1	645154	646587		8025822726	COG3669===Alpha-L-fucosidase	pfam01120===Alpha_L_fucos<<>>pfam00754===F5_F8_type_C
8025822881	Ga0609718_01_204534_205991	alpha-L-fucosidase	8025822726	Paenibacillus sp. ClWae2A	1	204534	205991		8025822726	COG3669===Alpha-L-fucosidase	pfam01120===Alpha_L_fucos<<>>pfam16757===Fucosidase_C
8025827951	Ga0609718_12_74600_75325	alpha-L-fucosidase	8025822726	Paenibacillus sp. ClWae2A	1	74600	75325		8025822737	COG3669===Alpha-L-fucosidase	pfam00754===F5_F8_type_C<<>>pfam01120===Alpha_L_fucos
8025823124	Ga0609718_01_475885_478203	alpha-L-fucosidase 2	8025822726	Paenibacillus sp. ClWae2A	1	475885	478203		8025822726		pfam14498===Glyco_hyd_65N_2
8025828472	Ga0609718_15_78958_81339	alpha-L-fucosidase 2	8025822726	Paenibacillus sp. ClWae2A	1	78958	81339		8025822740		pfam14498===Glyco_hyd_65N_2
8025823306	Ga0609718_01_711116_713956	alpha-L-rhamnosidase	8025822726	Paenibacillus sp. ClWae2A	1	711116	713956		8025822726		pfam05592===Bac_rhamnosid<<>>pfam08531===Bac_rhamnosid_N<<>>pfam17389===Bac_rhamnosid6H<<>>pfam17390===Bac_rhamnosid_C
8025825254	Ga0609718_03_243949_245502	alpha-L-rhamnosidase	8025822726	Paenibacillus sp. ClWae2A	1	243949	245502		8025822728		pfam17389===Bac_rhamnosid6H
8025823727	Ga0609718_01_1183924_1186644	alpha-L-rhamnosidase	8025822726	Paenibacillus sp. ClWae2A	1	1183924	1186644		8025822726		pfam05592===Bac_rhamnosid<<>>pfam17389===Bac_rhamnosid6H<<>>pfam08531===Bac_rhamnosid_N<<>>pfam17390===Bac_rhamnosid_C
8025827971	Ga0609718_12_95722_98895	alpha-mannosidase	8025822726	Paenibacillus sp. ClWae2A	1	95722	98895		8025822737	COG0383===Alpha-mannosidase	pfam09261===Alpha-mann_mid<<>>pfam01074===Glyco_hydro_38N<<>>pfam07748===Glyco_hydro_38C<<>>pfam17677===Glyco_hydro38C2
8025822890	Ga0609718_01_220919_223711	alpha-mannosidase	8025822726	Paenibacillus sp. ClWae2A	1	220919	223711		8025822726	COG0383===Alpha-mannosidase	pfam01074===Glyco_hydro_38N<<>>pfam17677===Glyco_hydro38C2<<>>pfam07748===Glyco_hydro_38C<<>>pfam18438===Glyco_hydro_38<<>>pfam09261===Alpha-mann_mid
8025827941	Ga0609718_12_56643_59774	alpha-mannosidase	8025822726	Paenibacillus sp. ClWae2A	1	56643	59774		8025822737	COG0383===Alpha-mannosidase	pfam01074===Glyco_hydro_38N<<>>pfam07748===Glyco_hydro_38C<<>>pfam09261===Alpha-mann_mid<<>>pfam17677===Glyco_hydro38C2
8025826350	Ga0609718_05_204088_206871	alpha-mannosidase	8025822726	Paenibacillus sp. ClWae2A	1	204088	206871		8025822730	COG0383===Alpha-mannosidase	pfam07748===Glyco_hydro_38C<<>>pfam01074===Glyco_hydro_38N<<>>pfam18438===Glyco_hydro_38<<>>pfam09261===Alpha-mann_mid<<>>pfam17677===Glyco_hydro38C2
8025827281	Ga0609718_08_195892_199041	alpha-mannosidase	8025822726	Paenibacillus sp. ClWae2A	1	195892	199041		8025822733	COG0383===Alpha-mannosidase	pfam17677===Glyco_hydro38C2<<>>pfam01074===Glyco_hydro_38N<<>>pfam07748===Glyco_hydro_38C<<>>pfam09261===Alpha-mann_mid
8025826353	Ga0609718_05_211620_214853	alpha-mannosidase	8025822726	Paenibacillus sp. ClWae2A	1	211620	214853		8025822730	COG0383===Alpha-mannosidase	pfam07748===Glyco_hydro_38C<<>>pfam01074===Glyco_hydro_38N<<>>pfam17677===Glyco_hydro38C2<<>>pfam09261===Alpha-mann_mid
8025823158	Ga0609718_01_519494_521002	alpha-N-arabinofuranosidase	8025822726	Paenibacillus sp. ClWae2A	1	519494	521002		8025822726	COG3534===Alpha-L-arabinofuranosidase	pfam06964===Alpha-L-AF_C
8025828918	Ga0609718_21_23920_25425	alpha-N-arabinofuranosidase	8025822726	Paenibacillus sp. ClWae2A	1	23920	25425		8025822746	COG3534===Alpha-L-arabinofuranosidase	pfam06964===Alpha-L-AF_C
8025829064	Ga0609718_23_30081_31556	alpha-N-arabinofuranosidase	8025822726	Paenibacillus sp. ClWae2A	1	30081	31556		8025822748	COG3534===Alpha-L-arabinofuranosidase	pfam06964===Alpha-L-AF_C
8025826839	Ga0609718_07_56144_56839	alpha-ribazole phosphatase	8025822726	Paenibacillus sp. ClWae2A	1	56144	56839		8025822732	COG0406===Broad specificity phosphatase PhoE	pfam00300===His_Phos_1
8025823357	Ga0609718_01_770634_771521	alpha-tubulin suppressor-like RCC1 family protein	8025822726	Paenibacillus sp. ClWae2A	1	770634	771521		8025822726	COG5184===Alpha-tubulin suppressor and related RCC1 domain-containing proteins	pfam13540===RCC1_2
8025826680	Ga0609718_06_190366_191934	alpha-tubulin suppressor-like RCC1 family protein	8025822726	Paenibacillus sp. ClWae2A	1	190366	191934		8025822731	COG5184===Alpha-tubulin suppressor and related RCC1 domain-containing proteins	pfam00415===RCC1<<>>pfam13540===RCC1_2<<>>pfam07833===Cu_amine_oxidN1
8025827672	Ga0609718_10_131411_133000	alpha-tubulin suppressor-like RCC1 family protein	8025822726	Paenibacillus sp. ClWae2A	1	131411	133000		8025822735	COG5184===Alpha-tubulin suppressor and related RCC1 domain-containing proteins	pfam13540===RCC1_2
8025824354	Ga0609718_02_408668_410182	altronate hydrolase	8025822726	Paenibacillus sp. ClWae2A	1	408668	410182		8025822727	COG2721===Altronate dehydratase	pfam04295===GD_AH_C<<>>pfam08666===SAF
8025827564	Ga0609718_10_2297_4231	amidase	8025822726	Paenibacillus sp. ClWae2A	1	2297	4231		8025822735	COG0154===Asp-tRNAAsn/Glu-tRNAGln amidotransferase A subunit or related amidase	pfam01425===Amidase<<>>pfam00395===SLH
8025823572	Ga0609718_01_1002432_1003928	amidase	8025822726	Paenibacillus sp. ClWae2A	1	1002432	1003928		8025822726	COG0154===Asp-tRNAAsn/Glu-tRNAGln amidotransferase A subunit or related amidase	pfam01425===Amidase
8025826304	Ga0609718_05_147042_148253	amidohydrolase	8025822726	Paenibacillus sp. ClWae2A	1	147042	148253		8025822730	COG1473===Metal-dependent amidase/aminoacylase/carboxypeptidase	pfam07687===M20_dimer<<>>pfam01546===Peptidase_M20
8025823594	Ga0609718_01_1021637_1022812	amidohydrolase	8025822726	Paenibacillus sp. ClWae2A	1	1021637	1022812		8025822726	COG1473===Metal-dependent amidase/aminoacylase/carboxypeptidase	pfam07687===M20_dimer
8025825293	Ga0609718_03_290821_291990	amidohydrolase	8025822726	Paenibacillus sp. ClWae2A	1	290821	291990		8025822728	COG1473===Metal-dependent amidase/aminoacylase/carboxypeptidase	pfam01546===Peptidase_M20<<>>pfam07687===M20_dimer
8025822897	Ga0609718_01_229014_230225	amidohydrolase	8025822726	Paenibacillus sp. ClWae2A	1	229014	230225		8025822726	COG1473===Metal-dependent amidase/aminoacylase/carboxypeptidase	pfam01546===Peptidase_M20<<>>pfam07687===M20_dimer
8025827577	Ga0609718_10_16536_18014	amidophosphoribosyltransferase	8025822726	Paenibacillus sp. ClWae2A	1	16536	18014		8025822735	COG0034===Glutamine phosphoribosylpyrophosphate amidotransferase	pfam13537===GATase_7
8025827717	Ga0609718_10_183669_186764	amino acid adenylation domain-containing protein	8025822726	Paenibacillus sp. ClWae2A	1	183669	186764		8025822735	COG0236===Acyl carrier protein<<>>COG1020===Non-ribosomal peptide synthetase component F	pfam00550===PP-binding<<>>pfam13193===AMP-binding_C<<>>pfam00668===Condensation<<>>pfam00501===AMP-binding
8025827715	Ga0609718_10_177773_182395	amino acid adenylation domain-containing protein	8025822726	Paenibacillus sp. ClWae2A	1	177773	182395		8025822735	COG1020===Non-ribosomal peptide synthetase component F	pfam00501===AMP-binding<<>>pfam00668===Condensation<<>>pfam00550===PP-binding
8025827718	Ga0609718_10_186765_190790	amino acid adenylation domain-containing protein	8025822726	Paenibacillus sp. ClWae2A	1	186765	190790		8025822735	COG0236===Acyl carrier protein<<>>COG1020===Non-ribosomal peptide synthetase component F<<>>COG3319===Thioesterase domain of type I polyketide synthase or non-ribosomal peptide synthetase	pfam00668===Condensation<<>>pfam00975===Thioesterase<<>>pfam00550===PP-binding<<>>pfam00501===AMP-binding<<>>pfam13193===AMP-binding_C
8025823709	Ga0609718_01_1144565_1154386	amino acid adenylation domain-containing protein/non-ribosomal peptide synthase protein (TIGR01720 family)	8025822726	Paenibacillus sp. ClWae2A	1	1144565	1154386		8025822726	COG3433===Aryl carrier domain<<>>COG1020===Non-ribosomal peptide synthetase component F	pfam00550===PP-binding<<>>pfam13193===AMP-binding_C<<>>pfam00668===Condensation<<>>pfam00501===AMP-binding
8025824372	Ga0609718_02_430029_433736	amino acid adenylation domain-containing protein/thioester reductase-like protein	8025822726	Paenibacillus sp. ClWae2A	1	430029	433736		8025822727	COG3320===Thioester reductase domain of alpha aminoadipate reductase Lys2 and NRPSs<<>>COG1020===Non-ribosomal peptide synthetase component F	pfam00501===AMP-binding<<>>pfam13193===AMP-binding_C<<>>pfam00550===PP-binding<<>>pfam07993===NAD_binding_4
8025826951	Ga0609718_07_167946_169763	amino acid transporter	8025822726	Paenibacillus sp. ClWae2A	1	167946	169763		8025822732	COG0531===Amino acid transporter	pfam13520===AA_permease_2
8025824338	Ga0609718_02_386299_386583	amino acid transporter	8025822726	Paenibacillus sp. ClWae2A	1	386299	386583		8025822727	COG0531===Amino acid transporter
8025825507	Ga0609718_03_514910_515380	amino-acid N-acetyltransferase	8025822726	Paenibacillus sp. ClWae2A	1	514910	515380		8025822728	COG1246===N-acetylglutamate synthase or related acetyltransferase, GNAT family	pfam00583===Acetyltransf_1
8025826403	Ga0609718_05_269256_270362	aminodeoxyfutalosine synthase	8025822726	Paenibacillus sp. ClWae2A	1	269256	270362		8025822730	COG1060===2-iminoacetate synthase ThiH (tyrosine cleavage enzyme, thamine biosynthesis)	pfam19288===CofH_C<<>>pfam04055===Radical_SAM
8025827837	Ga0609718_11_115603_116373	aminoglycoside 3-N-acetyltransferase	8025822726	Paenibacillus sp. ClWae2A	1	115603	116373		8025822736	COG2746===Aminoglycoside N3'-acetyltransferase	pfam02522===Antibiotic_NAT
8025824082	Ga0609718_02_148477_149286	aminoglycoside 3-N-acetyltransferase	8025822726	Paenibacillus sp. ClWae2A	1	148477	149286		8025822727	COG2746===Aminoglycoside N3'-acetyltransferase	pfam02522===Antibiotic_NAT
8025824986	Ga0609718_02_1071219_1071761	aminoglycoside 6'-N-acetyltransferase	8025822726	Paenibacillus sp. ClWae2A	1	1071219	1071761		8025822727	COG1670===Protein N-acetyltransferase, RimJ/RimL family	pfam13523===Acetyltransf_8
8025827883	Ga0609718_11_167537_168082	aminoglycoside 6'-N-acetyltransferase I	8025822726	Paenibacillus sp. ClWae2A	1	167537	168082		8025822736	COG5628===Predicted acetyltransferase
8025823187	Ga0609718_01_549029_549910	aminoglycoside phosphotransferase	8025822726	Paenibacillus sp. ClWae2A	1	549029	549910		8025822726	COG3231===Aminoglycoside phosphotransferase	pfam01636===APH
8025827265	Ga0609718_08_178193_179065	aminoglycoside phosphotransferase (APT) family kinase protein	8025822726	Paenibacillus sp. ClWae2A	1	178193	179065		8025822733	COG3173===Predicted kinase, aminoglycoside phosphotransferase (APT) family	pfam01636===APH
8025828522	Ga0609718_16_18802_19809	aminoglycoside phosphotransferase (APT) family kinase protein	8025822726	Paenibacillus sp. ClWae2A	1	18802	19809		8025822741	COG3173===Predicted kinase, aminoglycoside phosphotransferase (APT) family	pfam01636===APH
8025823555	Ga0609718_01_982257_983036	aminoglycoside phosphotransferase (APT) family kinase protein	8025822726	Paenibacillus sp. ClWae2A	1	982257	983036		8025822726	COG3173===Predicted kinase, aminoglycoside phosphotransferase (APT) family	pfam01636===APH
8025825531	Ga0609718_03_540263_541219	aminoglycoside phosphotransferase (APT) family kinase protein	8025822726	Paenibacillus sp. ClWae2A	1	540263	541219		8025822728	COG3173===Predicted kinase, aminoglycoside phosphotransferase (APT) family	pfam01636===APH
8025828418	Ga0609718_15_24012_24944	aminoglycoside phosphotransferase (APT) family kinase protein	8025822726	Paenibacillus sp. ClWae2A	1	24012	24944		8025822740	COG3173===Predicted kinase, aminoglycoside phosphotransferase (APT) family	pfam01636===APH
8025824379	Ga0609718_02_439518_439988	aminoglycoside phosphotransferase (APT) family kinase protein	8025822726	Paenibacillus sp. ClWae2A	1	439518	439988		8025822727	COG3173===Predicted kinase, aminoglycoside phosphotransferase (APT) family	pfam03881===Fructosamin_kin
8025826811	Ga0609718_07_24766_25722	aminoglycoside phosphotransferase (APT) family kinase protein	8025822726	Paenibacillus sp. ClWae2A	1	24766	25722		8025822732	COG3173===Predicted kinase, aminoglycoside phosphotransferase (APT) family	pfam01636===APH
8025824380	Ga0609718_02_440034_440528	aminoglycoside phosphotransferase (APT) family kinase protein	8025822726	Paenibacillus sp. ClWae2A	1	440034	440528		8025822727	COG3173===Predicted kinase, aminoglycoside phosphotransferase (APT) family	pfam01636===APH
8025827186	Ga0609718_08_92550_93686	aminomethyltransferase	8025822726	Paenibacillus sp. ClWae2A	1	92550	93686		8025822733	COG0404===Glycine cleavage system T protein (aminomethyltransferase)	pfam08669===GCV_T_C<<>>pfam01571===GCV_T
8025823525	Ga0609718_01_954468_955700	aminopeptidase	8025822726	Paenibacillus sp. ClWae2A	1	954468	955700		8025822726	COG2309===Leucyl aminopeptidase (aminopeptidase T)	pfam02073===Peptidase_M29
8025825300	Ga0609718_03_296642_297757	aminopeptidase	8025822726	Paenibacillus sp. ClWae2A	1	296642	297757		8025822728	COG2309===Leucyl aminopeptidase (aminopeptidase T)	pfam02073===Peptidase_M29
8025823524	Ga0609718_01_953144_954376	aminopeptidase	8025822726	Paenibacillus sp. ClWae2A	1	953144	954376		8025822726	COG2309===Leucyl aminopeptidase (aminopeptidase T)	pfam02073===Peptidase_M29
8025822763	Ga0609718_01_45833_47077	aminopeptidase	8025822726	Paenibacillus sp. ClWae2A	1	45833	47077		8025822726	COG2309===Leucyl aminopeptidase (aminopeptidase T)	pfam02073===Peptidase_M29
8025824870	Ga0609718_02_950504_951712	aminotransferase	8025822726	Paenibacillus sp. ClWae2A	1	950504	951712		8025822727	COG0436===Aspartate/methionine/tyrosine aminotransferase	pfam00155===Aminotran_1_2
8025823842	Ga0609718_01_1319199_1320407	aminotransferase	8025822726	Paenibacillus sp. ClWae2A	1	1319199	1320407		8025822726	COG0436===Aspartate/methionine/tyrosine aminotransferase	pfam00155===Aminotran_1_2
8025826814	Ga0609718_07_27741_29030	Amt family ammonium transporter	8025822726	Paenibacillus sp. ClWae2A	1	27741	29030		8025822732	COG0004===Ammonia channel protein AmtB	pfam00909===Ammonium_transp
8025824477	Ga0609718_02_556615_558015	Amt family ammonium transporter	8025822726	Paenibacillus sp. ClWae2A	1	556615	558015		8025822727	COG0004===Ammonia channel protein AmtB	pfam00909===Ammonium_transp
8025828595	Ga0609718_16_81852_83894	anaerobic magnesium-protoporphyrin IX monomethyl ester cyclase	8025822726	Paenibacillus sp. ClWae2A	1	81852	83894		8025822741	COG1032===Radical SAM superfamily enzyme YgiQ, UPF0313 family	pfam02310===B12-binding<<>>pfam13311===DUF4080<<>>pfam04055===Radical_SAM
8025825855	Ga0609718_04_114981_116942	anaerobic ribonucleoside-triphosphate reductase	8025822726	Paenibacillus sp. ClWae2A	1	114981	116942		8025822729	COG1328===Anaerobic ribonucleoside-triphosphate reductase	pfam13597===NRDD
8025825854	Ga0609718_04_114475_114984	anaerobic ribonucleoside-triphosphate reductase activating protein	8025822726	Paenibacillus sp. ClWae2A	1	114475	114984		8025822729	COG0602===Organic radical activating enzyme	pfam13353===Fer4_12
8025825904	Ga0609718_04_183182_185245	anaerobic selenocysteine-containing dehydrogenase	8025822726	Paenibacillus sp. ClWae2A	1	183182	185245		8025822729	COG0243===Anaerobic selenocysteine-containing dehydrogenase	pfam00384===Molybdopterin<<>>pfam01568===Molydop_binding<<>>pfam04879===Molybdop_Fe4S4
8025828368	Ga0609718_14_152365_153594	anhydro-N-acetylmuramic acid kinase	8025822726	Paenibacillus sp. ClWae2A	1	152365	153594		8025822739	COG2377===1,6-Anhydro-N-acetylmuramate kinase	pfam03702===AnmK
8025826799	Ga0609718_07_13608_14129	ankyrin repeat protein	8025822726	Paenibacillus sp. ClWae2A	1	13608	14129		8025822732	COG0666===Ankyrin repeat	pfam12796===Ank_2<<>>pfam13606===Ank_3
8025823217	Ga0609718_01_584652_585356	ankyrin repeat protein	8025822726	Paenibacillus sp. ClWae2A	1	584652	585356		8025822726	COG0666===Ankyrin repeat	pfam00023===Ank<<>>pfam12796===Ank_2
8025825698	Ga0609718_03_730439_731023	ankyrin repeat protein	8025822726	Paenibacillus sp. ClWae2A	1	730439	731023		8025822728	COG0666===Ankyrin repeat	pfam12796===Ank_2
8025828235	Ga0609718_14_16579_17610	antagonist of KipI	8025822726	Paenibacillus sp. ClWae2A	1	16579	17610		8025822739	COG1984===Allophanate hydrolase subunit 2	pfam02626===CT_A_B
8025827451	Ga0609718_09_106196_107272	anthranilate phosphoribosyltransferase	8025822726	Paenibacillus sp. ClWae2A	1	106196	107272		8025822734	COG0547===Anthranilate phosphoribosyltransferase	pfam02885===Glycos_trans_3N<<>>pfam00591===Glycos_transf_3
8025823896	Ga0609718_01_1369728_1370819	anthranilate phosphoribosyltransferase	8025822726	Paenibacillus sp. ClWae2A	1	1369728	1370819		8025822726	COG0547===Anthranilate phosphoribosyltransferase	pfam02885===Glycos_trans_3N<<>>pfam00591===Glycos_transf_3
8025823897	Ga0609718_01_1370837_1372405	anthranilate synthase component 1	8025822726	Paenibacillus sp. ClWae2A	1	1370837	1372405		8025822726	COG0147===Anthranilate/para-aminobenzoate synthases component I	pfam04715===Anth_synt_I_N<<>>pfam00425===Chorismate_bind
8025828792	Ga0609718_19_42845_43183	anti-sigma B factor antagonist	8025822726	Paenibacillus sp. ClWae2A	1	42845	43183		8025822744	COG1366===Anti-anti-sigma regulatory factor (antagonist of anti-sigma factor)	pfam13466===STAS_2
8025828111	Ga0609718_13_61769_62752	anti-sigma-K factor RskA	8025822726	Paenibacillus sp. ClWae2A	1	61769	62752		8025822738	COG5343===Anti-sigma-K factor RskA	pfam10099===RskA<<>>pfam13490===zf-HC2
8025828605	Ga0609718_17_941_1234	antitoxin MazE	8025822726	Paenibacillus sp. ClWae2A	1	941	1234		8025822742	COG2336===Antitoxin component of the MazEF toxin-antitoxin module	pfam04014===MazE_antitoxin
8025827329	Ga0609718_08_260448_260750	antitoxin MazE	8025822726	Paenibacillus sp. ClWae2A	1	260448	260750		8025822733	COG2336===Antitoxin component of the MazEF toxin-antitoxin module	pfam04014===MazE_antitoxin
8025823566	Ga0609718_01_996088_997530	APA family basic amino acid/polyamine antiporter	8025822726	Paenibacillus sp. ClWae2A	1	996088	997530		8025822726	COG0531===Amino acid transporter	pfam13520===AA_permease_2
8025828900	Ga0609718_21_425_1906	arabinan endo-1,5-alpha-L-arabinosidase	8025822726	Paenibacillus sp. ClWae2A	1	425	1906		8025822746	COG3507===Beta-xylosidase	pfam16369===GH43_C<<>>pfam04616===Glyco_hydro_43
8025828904	Ga0609718_21_5293_6270	arabinan endo-1,5-alpha-L-arabinosidase	8025822726	Paenibacillus sp. ClWae2A	1	5293	6270		8025822746	COG3507===Beta-xylosidase	pfam04616===Glyco_hydro_43
8025822863	Ga0609718_01_181053_183470	arabinan endo-1,5-alpha-L-arabinosidase	8025822726	Paenibacillus sp. ClWae2A	1	181053	183470		8025822726	COG3507===Beta-xylosidase	pfam13385===Laminin_G_3<<>>pfam16369===GH43_C<<>>pfam04616===Glyco_hydro_43
8025824391	Ga0609718_02_456867_457952	arabinogalactan endo-1,4-beta-galactosidase	8025822726	Paenibacillus sp. ClWae2A	1	456867	457952		8025822727	COG3867===Arabinogalactan endo-1,4-beta-galactosidase	pfam07745===Glyco_hydro_53
8025826383	Ga0609718_05_250082_251131	arabinogalactan endo-1,4-beta-galactosidase	8025822726	Paenibacillus sp. ClWae2A	1	250082	251131		8025822730	COG3867===Arabinogalactan endo-1,4-beta-galactosidase	pfam07745===Glyco_hydro_53
8025823795	Ga0609718_01_1255769_1260145	arabinogalactan endo-1,4-beta-galactosidase	8025822726	Paenibacillus sp. ClWae2A	1	1255769	1260145		8025822726	COG3867===Arabinogalactan endo-1,4-beta-galactosidase	pfam07554===FIVAR<<>>pfam00395===SLH<<>>pfam07532===Big_4<<>>pfam00754===F5_F8_type_C<<>>pfam07745===Glyco_hydro_53
8025826704	Ga0609718_06_226086_227441	arabinogalactan oligomer/maltooligosaccharide transport system permease protein	8025822726	Paenibacillus sp. ClWae2A	1	226086	227441		8025822731	COG1175===ABC-type sugar transport system, permease component	pfam00528===BPD_transp_1
8025826703	Ga0609718_06_225253_226089	arabinogalactan oligomer/maltooligosaccharide transport system permease protein	8025822726	Paenibacillus sp. ClWae2A	1	225253	226089		8025822731	COG3833===ABC-type maltose transport system, permease component	pfam00528===BPD_transp_1
8025826705	Ga0609718_06_227739_229025	arabinogalactan oligomer/maltooligosaccharide transport system substrate-binding protein	8025822726	Paenibacillus sp. ClWae2A	1	227739	229025		8025822731	COG2182===Maltose-binding periplasmic protein MalE	pfam13416===SBP_bac_8
8025823406	Ga0609718_01_821926_822774	arabinosaccharide transport system permease protein	8025822726	Paenibacillus sp. ClWae2A	1	821926	822774		8025822726	COG0395===ABC-type glycerol-3-phosphate transport system, permease component	pfam00528===BPD_transp_1
8025823405	Ga0609718_01_821028_821924	arabinosaccharide transport system permease protein	8025822726	Paenibacillus sp. ClWae2A	1	821028	821924		8025822726	COG1175===ABC-type sugar transport system, permease component	pfam00528===BPD_transp_1
8025823404	Ga0609718_01_819606_820943	arabinosaccharide transport system substrate-binding protein	8025822726	Paenibacillus sp. ClWae2A	1	819606	820943		8025822726	COG1653===ABC-type glycerol-3-phosphate transport system, periplasmic component	pfam13416===SBP_bac_8
8025823084	Ga0609718_01_421130_422647	arabinoxylan arabinofuranohydrolase	8025822726	Paenibacillus sp. ClWae2A	1	421130	422647		8025822726		pfam04616===Glyco_hydro_43<<>>pfam03422===CBM_6
8025823275	Ga0609718_01_662221_663642	arabinoxylan arabinofuranohydrolase	8025822726	Paenibacillus sp. ClWae2A	1	662221	663642		8025822726		pfam04616===Glyco_hydro_43
8025825641	Ga0609718_03_661882_663804	arabinoxylan arabinofuranohydrolase	8025822726	Paenibacillus sp. ClWae2A	1	661882	663804		8025822728		pfam03422===CBM_6<<>>pfam04616===Glyco_hydro_43
8025822892	Ga0609718_01_224986_225909	AraC family 4-hydroxyphenylacetate 3-monooxygenase operon regulatory protein	8025822726	Paenibacillus sp. ClWae2A	1	224986	225909		8025822726	COG2207===AraC-type DNA-binding domain and AraC-containing proteins<<>>COG1917===Cupin domain protein related to quercetin dioxygenase	pfam12833===HTH_18<<>>pfam02311===AraC_binding
8025828909	Ga0609718_21_9956_10819	AraC family L-rhamnose operon regulatory protein RhaS	8025822726	Paenibacillus sp. ClWae2A	1	9956	10819		8025822746	COG2207===AraC-type DNA-binding domain and AraC-containing proteins	pfam02311===AraC_binding<<>>pfam12833===HTH_18
8025823728	Ga0609718_01_1186779_1187663	AraC family L-rhamnose operon transcriptional activator RhaR	8025822726	Paenibacillus sp. ClWae2A	1	1186779	1187663		8025822726	COG2207===AraC-type DNA-binding domain and AraC-containing proteins	pfam12833===HTH_18<<>>pfam02311===AraC_binding
8025827658	Ga0609718_10_113346_114299	AraC family transcriptional activator of mtrCDE	8025822726	Paenibacillus sp. ClWae2A	1	113346	114299		8025822735	COG2207===AraC-type DNA-binding domain and AraC-containing proteins	pfam02311===AraC_binding<<>>pfam12833===HTH_18
8025829167	Ga0609718_25_20560_21339	AraC family transcriptional activator of pobA	8025822726	Paenibacillus sp. ClWae2A	1	20560	21339		8025822750	COG2207===AraC-type DNA-binding domain and AraC-containing proteins	pfam12833===HTH_18
8025823454	Ga0609718_01_871891_872802	AraC family transcriptional activator of pobA	8025822726	Paenibacillus sp. ClWae2A	1	871891	872802		8025822726	COG2207===AraC-type DNA-binding domain and AraC-containing proteins<<>>COG0662===Mannose-6-phosphate isomerase, cupin superfamily	pfam02311===AraC_binding<<>>pfam12833===HTH_18
8025826514	Ga0609718_06_11031_11927	AraC family transcriptional activator of pobA	8025822726	Paenibacillus sp. ClWae2A	1	11031	11927		8025822731	COG2207===AraC-type DNA-binding domain and AraC-containing proteins	pfam02311===AraC_binding<<>>pfam12833===HTH_18
8025828600	Ga0609718_16_91673_92566	AraC family transcriptional regulator	8025822726	Paenibacillus sp. ClWae2A	1	91673	92566		8025822741	COG2207===AraC-type DNA-binding domain and AraC-containing proteins<<>>COG3708===Predicted transcriptional regulator YdeE, contains AraC-type DNA-binding domain	pfam12833===HTH_18<<>>pfam14526===Cass2
8025826364	Ga0609718_05_232631_233536	AraC family transcriptional regulator	8025822726	Paenibacillus sp. ClWae2A	1	232631	233536		8025822730	COG2207===AraC-type DNA-binding domain and AraC-containing proteins	pfam14526===Cass2<<>>pfam12833===HTH_18
8025827867	Ga0609718_11_148707_149579	AraC family transcriptional regulator	8025822726	Paenibacillus sp. ClWae2A	1	148707	149579		8025822736	COG3708===Predicted transcriptional regulator YdeE, contains AraC-type DNA-binding domain<<>>COG2207===AraC-type DNA-binding domain and AraC-containing proteins	pfam12833===HTH_18<<>>pfam06445===GyrI-like
8025823164	Ga0609718_01_528169_528999	AraC family transcriptional regulator	8025822726	Paenibacillus sp. ClWae2A	1	528169	528999		8025822726	COG2207===AraC-type DNA-binding domain and AraC-containing proteins	pfam02311===AraC_binding<<>>pfam12833===HTH_18
8025824952	Ga0609718_02_1039400_1040245	AraC family transcriptional regulator	8025822726	Paenibacillus sp. ClWae2A	1	1039400	1040245		8025822727	COG3708===Predicted transcriptional regulator YdeE, contains AraC-type DNA-binding domain<<>>COG2207===AraC-type DNA-binding domain and AraC-containing proteins	pfam12833===HTH_18<<>>pfam14526===Cass2
8025826798	Ga0609718_07_12676_13539	AraC family transcriptional regulator	8025822726	Paenibacillus sp. ClWae2A	1	12676	13539		8025822732	COG2207===AraC-type DNA-binding domain and AraC-containing proteins	pfam12833===HTH_18
8025823196	Ga0609718_01_559656_560510	AraC family transcriptional regulator	8025822726	Paenibacillus sp. ClWae2A	1	559656	560510		8025822726	COG2207===AraC-type DNA-binding domain and AraC-containing proteins<<>>COG3708===Predicted transcriptional regulator YdeE, contains AraC-type DNA-binding domain	pfam12833===HTH_18<<>>pfam14526===Cass2
8025822789	Ga0609718_01_76115_77098	AraC family transcriptional regulator	8025822726	Paenibacillus sp. ClWae2A	1	76115	77098		8025822726	COG2207===AraC-type DNA-binding domain and AraC-containing proteins	pfam12833===HTH_18
8025824037	Ga0609718_02_106362_107129	AraC family transcriptional regulator	8025822726	Paenibacillus sp. ClWae2A	1	106362	107129		8025822727	COG2207===AraC-type DNA-binding domain and AraC-containing proteins	pfam12833===HTH_18
8025828754	Ga0609718_18_76896_77765	AraC family transcriptional regulator	8025822726	Paenibacillus sp. ClWae2A	1	76896	77765		8025822743	COG3708===Predicted transcriptional regulator YdeE, contains AraC-type DNA-binding domain<<>>COG2207===AraC-type DNA-binding domain and AraC-containing proteins	pfam12833===HTH_18<<>>pfam14526===Cass2
8025827492	Ga0609718_09_153983_154807	AraC family transcriptional regulator	8025822726	Paenibacillus sp. ClWae2A	1	153983	154807		8025822734	COG2207===AraC-type DNA-binding domain and AraC-containing proteins	pfam02311===AraC_binding<<>>pfam12833===HTH_18
8025823496	Ga0609718_01_916993_917577	AraC family transcriptional regulator of adaptative response / methylphosphotriester-DNA alkyltransferase methyltransferase	8025822726	Paenibacillus sp. ClWae2A	1	916993	917577		8025822726	COG2169===Methylphosphotriester-DNA--protein-cysteine methyltransferase (N-terminal fragment of Ada), contains Zn-binding and two AraC-type DNA-binding domains	pfam12833===HTH_18<<>>pfam02805===Ada_Zn_binding
8025827542	Ga0609718_09_205909_206961	AraC family transcriptional regulator of adaptative response/methylated-DNA-[protein]-cysteine methyltransferase	8025822726	Paenibacillus sp. ClWae2A	1	205909	206961		8025822734	COG2169===Methylphosphotriester-DNA--protein-cysteine methyltransferase (N-terminal fragment of Ada), contains Zn-binding and two AraC-type DNA-binding domains<<>>COG0350===O6-methylguanine-DNA--protein-cysteine methyltransferase	pfam01035===DNA_binding_1<<>>pfam02805===Ada_Zn_binding<<>>pfam12833===HTH_18
8025827924	Ga0609718_12_37206_38033	AraC family transcriptional regulator of arabinose operon	8025822726	Paenibacillus sp. ClWae2A	1	37206	38033		8025822737	COG2207===AraC-type DNA-binding domain and AraC-containing proteins	pfam02311===AraC_binding<<>>pfam12833===HTH_18
8025822880	Ga0609718_01_203578_204411	AraC family transcriptional regulator of arabinose operon	8025822726	Paenibacillus sp. ClWae2A	1	203578	204411		8025822726	COG2207===AraC-type DNA-binding domain and AraC-containing proteins	pfam02311===AraC_binding<<>>pfam12833===HTH_18
8025826959	Ga0609718_07_175892_176758	AraC family transcriptional regulator of arabinose operon	8025822726	Paenibacillus sp. ClWae2A	1	175892	176758		8025822732	COG0662===Mannose-6-phosphate isomerase, cupin superfamily<<>>COG2207===AraC-type DNA-binding domain and AraC-containing proteins	pfam02311===AraC_binding<<>>pfam12833===HTH_18
8025823076	Ga0609718_01_413675_414556	AraC family transcriptional regulator of arabinose operon	8025822726	Paenibacillus sp. ClWae2A	1	413675	414556		8025822726	COG2207===AraC-type DNA-binding domain and AraC-containing proteins	pfam12833===HTH_18<<>>pfam02311===AraC_binding
8025826456	Ga0609718_05_320384_321259	AraC family transcriptional regulator of arabinose operon	8025822726	Paenibacillus sp. ClWae2A	1	320384	321259		8025822730	COG2207===AraC-type DNA-binding domain and AraC-containing proteins	pfam12833===HTH_18<<>>pfam07883===Cupin_2
8025829132	Ga0609718_24_41180_42010	AraC family transcriptional regulator of arabinose operon	8025822726	Paenibacillus sp. ClWae2A	1	41180	42010		8025822749	COG2207===AraC-type DNA-binding domain and AraC-containing proteins	pfam02311===AraC_binding<<>>pfam12833===HTH_18
8025823264	Ga0609718_01_648741_649568	AraC family transcriptional regulator of arabinose operon	8025822726	Paenibacillus sp. ClWae2A	1	648741	649568		8025822726	COG2207===AraC-type DNA-binding domain and AraC-containing proteins	pfam02311===AraC_binding<<>>pfam12833===HTH_18
8025825183	Ga0609718_03_169877_170695	AraC family transcriptional regulator of arabinose operon	8025822726	Paenibacillus sp. ClWae2A	1	169877	170695		8025822728	COG2207===AraC-type DNA-binding domain and AraC-containing proteins	pfam12833===HTH_18<<>>pfam02311===AraC_binding
8025822934	Ga0609718_01_262007_262822	AraC family transcriptional regulator of arabinose operon	8025822726	Paenibacillus sp. ClWae2A	1	262007	262822		8025822726	COG2207===AraC-type DNA-binding domain and AraC-containing proteins	pfam02311===AraC_binding<<>>pfam12833===HTH_18
8025826324	Ga0609718_05_174654_175439	AraC family transcriptional regulator of arabinose operon	8025822726	Paenibacillus sp. ClWae2A	1	174654	175439		8025822730	COG2207===AraC-type DNA-binding domain and AraC-containing proteins	pfam12833===HTH_18<<>>pfam02311===AraC_binding
8025828301	Ga0609718_14_77661_78512	AraC family transcriptional regulator of arabinose operon	8025822726	Paenibacillus sp. ClWae2A	1	77661	78512		8025822739	COG2207===AraC-type DNA-binding domain and AraC-containing proteins	pfam02311===AraC_binding<<>>pfam12833===HTH_18
8025826299	Ga0609718_05_141913_142764	AraC-like DNA-binding protein	8025822726	Paenibacillus sp. ClWae2A	1	141913	142764		8025822730	COG2207===AraC-type DNA-binding domain and AraC-containing proteins	pfam02311===AraC_binding<<>>pfam12833===HTH_18
8025826943	Ga0609718_07_152810_154441	AraC-like DNA-binding protein	8025822726	Paenibacillus sp. ClWae2A	1	152810	154441		8025822732	COG2207===AraC-type DNA-binding domain and AraC-containing proteins	pfam01497===Peripla_BP_2<<>>pfam12833===HTH_18<<>>pfam06719===AraC_N
8025827235	Ga0609718_08_152115_152900	AraC-like DNA-binding protein	8025822726	Paenibacillus sp. ClWae2A	1	152115	152900		8025822733	COG2207===AraC-type DNA-binding domain and AraC-containing proteins	pfam12833===HTH_18<<>>pfam02311===AraC_binding
8025828187	Ga0609718_13_142645_143400	AraC-like DNA-binding protein	8025822726	Paenibacillus sp. ClWae2A	1	142645	143400		8025822738	COG2207===AraC-type DNA-binding domain and AraC-containing proteins	pfam12833===HTH_18
8025823109	Ga0609718_01_458121_458954	AraC-like DNA-binding protein	8025822726	Paenibacillus sp. ClWae2A	1	458121	458954		8025822726	COG2207===AraC-type DNA-binding domain and AraC-containing proteins	pfam02311===AraC_binding<<>>pfam12833===HTH_18
8025823980	Ga0609718_02_43143_44045	AraC-like DNA-binding protein	8025822726	Paenibacillus sp. ClWae2A	1	43143	44045		8025822727	COG2207===AraC-type DNA-binding domain and AraC-containing proteins	pfam12833===HTH_18<<>>pfam02311===AraC_binding
8025825678	Ga0609718_03_708738_709697	AraC-like DNA-binding protein	8025822726	Paenibacillus sp. ClWae2A	1	708738	709697		8025822728	COG2207===AraC-type DNA-binding domain and AraC-containing proteins	pfam12833===HTH_18
8025828189	Ga0609718_13_145272_146132	AraC-like DNA-binding protein	8025822726	Paenibacillus sp. ClWae2A	1	145272	146132		8025822738	COG2207===AraC-type DNA-binding domain and AraC-containing proteins	pfam02311===AraC_binding<<>>pfam12833===HTH_18
8025823276	Ga0609718_01_663765_664679	AraC-like DNA-binding protein	8025822726	Paenibacillus sp. ClWae2A	1	663765	664679		8025822726	COG2207===AraC-type DNA-binding domain and AraC-containing proteins	pfam02311===AraC_binding<<>>pfam12833===HTH_18
8025824029	Ga0609718_02_95445_96302	AraC-like DNA-binding protein	8025822726	Paenibacillus sp. ClWae2A	1	95445	96302		8025822727	COG2207===AraC-type DNA-binding domain and AraC-containing proteins	pfam02311===AraC_binding<<>>pfam12833===HTH_18
8025823083	Ga0609718_01_420099_420968	AraC-like DNA-binding protein	8025822726	Paenibacillus sp. ClWae2A	1	420099	420968		8025822726	COG2207===AraC-type DNA-binding domain and AraC-containing proteins	pfam12833===HTH_18<<>>pfam02311===AraC_binding
8025823324	Ga0609718_01_738124_738936	AraC-like DNA-binding protein	8025822726	Paenibacillus sp. ClWae2A	1	738124	738936		8025822726	COG2207===AraC-type DNA-binding domain and AraC-containing proteins	pfam12833===HTH_18<<>>pfam02311===AraC_binding
8025827647	Ga0609718_10_99426_100235	AraC-like DNA-binding protein	8025822726	Paenibacillus sp. ClWae2A	1	99426	100235		8025822735	COG2207===AraC-type DNA-binding domain and AraC-containing proteins	pfam02311===AraC_binding<<>>pfam12833===HTH_18
8025828396	Ga0609718_15_2395_3234	AraC-like DNA-binding protein	8025822726	Paenibacillus sp. ClWae2A	1	2395	3234		8025822740	COG2207===AraC-type DNA-binding domain and AraC-containing proteins	pfam02311===AraC_binding<<>>pfam12833===HTH_18
8025827591	Ga0609718_10_36716_37633	AraC-like DNA-binding protein	8025822726	Paenibacillus sp. ClWae2A	1	36716	37633		8025822735	COG2207===AraC-type DNA-binding domain and AraC-containing proteins	pfam02311===AraC_binding<<>>pfam12833===HTH_18
8025823023	Ga0609718_01_353690_354613	AraC-like DNA-binding protein	8025822726	Paenibacillus sp. ClWae2A	1	353690	354613		8025822726	COG2207===AraC-type DNA-binding domain and AraC-containing proteins	pfam06719===AraC_N<<>>pfam12833===HTH_18
8025826600	Ga0609718_06_107070_108083	AraC-like DNA-binding protein	8025822726	Paenibacillus sp. ClWae2A	1	107070	108083		8025822731	COG2207===AraC-type DNA-binding domain and AraC-containing proteins	pfam07883===Cupin_2<<>>pfam12833===HTH_18
8025824356	Ga0609718_02_411889_412764	AraC-like DNA-binding protein	8025822726	Paenibacillus sp. ClWae2A	1	411889	412764		8025822727	COG2207===AraC-type DNA-binding domain and AraC-containing proteins	pfam12833===HTH_18<<>>pfam02311===AraC_binding
8025826389	Ga0609718_05_254607_255122	AraC-like DNA-binding protein	8025822726	Paenibacillus sp. ClWae2A	1	254607	255122		8025822730	COG2207===AraC-type DNA-binding domain and AraC-containing proteins	pfam12833===HTH_18
8025823284	Ga0609718_01_673606_674478	AraC-like DNA-binding protein	8025822726	Paenibacillus sp. ClWae2A	1	673606	674478		8025822726	COG2207===AraC-type DNA-binding domain and AraC-containing proteins	pfam02311===AraC_binding<<>>pfam12833===HTH_18
8025829161	Ga0609718_25_14366_15205	AraC-like DNA-binding protein	8025822726	Paenibacillus sp. ClWae2A	1	14366	15205		8025822750	COG2207===AraC-type DNA-binding domain and AraC-containing proteins	pfam12833===HTH_18
8025823274	Ga0609718_01_661277_662086	AraC-like DNA-binding protein	8025822726	Paenibacillus sp. ClWae2A	1	661277	662086		8025822726	COG2207===AraC-type DNA-binding domain and AraC-containing proteins	pfam12833===HTH_18
8025823125	Ga0609718_01_478322_479173	AraC-like DNA-binding protein	8025822726	Paenibacillus sp. ClWae2A	1	478322	479173		8025822726	COG2207===AraC-type DNA-binding domain and AraC-containing proteins	pfam02311===AraC_binding<<>>pfam12833===HTH_18
8025824570	Ga0609718_02_654257_655858	AraC-like DNA-binding protein	8025822726	Paenibacillus sp. ClWae2A	1	654257	655858		8025822727	COG2207===AraC-type DNA-binding domain and AraC-containing proteins	pfam01497===Peripla_BP_2<<>>pfam02311===AraC_binding<<>>pfam12833===HTH_18
8025825928	Ga0609718_04_217083_218057	AraC-like DNA-binding protein	8025822726	Paenibacillus sp. ClWae2A	1	217083	218057		8025822729	COG2207===AraC-type DNA-binding domain and AraC-containing proteins	pfam12833===HTH_18<<>>pfam02311===AraC_binding
8025822760	Ga0609718_01_41809_42654	AraC-like DNA-binding protein	8025822726	Paenibacillus sp. ClWae2A	1	41809	42654		8025822726	COG2207===AraC-type DNA-binding domain and AraC-containing proteins	pfam02311===AraC_binding<<>>pfam12833===HTH_18
8025824045	Ga0609718_02_117048_117929	AraC-like DNA-binding protein	8025822726	Paenibacillus sp. ClWae2A	1	117048	117929		8025822727	COG2207===AraC-type DNA-binding domain and AraC-containing proteins	pfam12833===HTH_18<<>>pfam02311===AraC_binding
8025823773	Ga0609718_01_1234132_1235085	AraC-like DNA-binding protein	8025822726	Paenibacillus sp. ClWae2A	1	1234132	1235085		8025822726	COG2207===AraC-type DNA-binding domain and AraC-containing proteins	pfam02311===AraC_binding<<>>pfam12833===HTH_18
8025823821	Ga0609718_01_1287046_1288686	AraC-like DNA-binding protein	8025822726	Paenibacillus sp. ClWae2A	1	1287046	1288686		8025822726	COG2207===AraC-type DNA-binding domain and AraC-containing proteins	pfam12833===HTH_18<<>>pfam01497===Peripla_BP_2
8025824350	Ga0609718_02_403461_404294	AraC-like DNA-binding protein	8025822726	Paenibacillus sp. ClWae2A	1	403461	404294		8025822727	COG2207===AraC-type DNA-binding domain and AraC-containing proteins	pfam02311===AraC_binding<<>>pfam12833===HTH_18
8025824382	Ga0609718_02_443095_444015	AraC-like DNA-binding protein	8025822726	Paenibacillus sp. ClWae2A	1	443095	444015		8025822727	COG2207===AraC-type DNA-binding domain and AraC-containing proteins	pfam12833===HTH_18<<>>pfam02311===AraC_binding
8025826486	Ga0609718_05_344647_347040	AraC-like DNA-binding protein	8025822726	Paenibacillus sp. ClWae2A	1	344647	347040		8025822730	COG2207===AraC-type DNA-binding domain and AraC-containing proteins	pfam12833===HTH_18<<>>pfam17853===GGDEF_2
8025827970	Ga0609718_12_94599_95522	AraC-like DNA-binding protein	8025822726	Paenibacillus sp. ClWae2A	1	94599	95522		8025822737	COG2207===AraC-type DNA-binding domain and AraC-containing proteins	pfam12833===HTH_18
8025822986	Ga0609718_01_315734_316732	AraC-like DNA-binding protein	8025822726	Paenibacillus sp. ClWae2A	1	315734	316732		8025822726	COG2207===AraC-type DNA-binding domain and AraC-containing proteins	pfam12833===HTH_18<<>>pfam12625===Arabinose_bd
8025825239	Ga0609718_03_225381_226253	AraC-like DNA-binding protein	8025822726	Paenibacillus sp. ClWae2A	1	225381	226253		8025822728	COG2207===AraC-type DNA-binding domain and AraC-containing proteins	pfam02311===AraC_binding<<>>pfam12833===HTH_18
8025822970	Ga0609718_01_300212_301096	AraC-like DNA-binding protein	8025822726	Paenibacillus sp. ClWae2A	1	300212	301096		8025822726	COG2207===AraC-type DNA-binding domain and AraC-containing proteins	pfam02311===AraC_binding<<>>pfam12833===HTH_18
8025827372	Ga0609718_09_19482_20378	AraC-like DNA-binding protein	8025822726	Paenibacillus sp. ClWae2A	1	19482	20378		8025822734	COG2207===AraC-type DNA-binding domain and AraC-containing proteins	pfam12833===HTH_18
8025827172	Ga0609718_08_74561_75535	AraC-like DNA-binding protein	8025822726	Paenibacillus sp. ClWae2A	1	74561	75535		8025822733	COG2207===AraC-type DNA-binding domain and AraC-containing proteins	pfam02311===AraC_binding<<>>pfam12833===HTH_18
8025824006	Ga0609718_02_71144_72010	AraC-like DNA-binding protein	8025822726	Paenibacillus sp. ClWae2A	1	71144	72010		8025822727	COG2207===AraC-type DNA-binding domain and AraC-containing proteins	pfam02311===AraC_binding<<>>pfam12833===HTH_18
8025826958	Ga0609718_07_174716_175651	AraC-like DNA-binding protein	8025822726	Paenibacillus sp. ClWae2A	1	174716	175651		8025822732	COG2207===AraC-type DNA-binding domain and AraC-containing proteins	pfam12833===HTH_18
8025826715	Ga0609718_06_240760_241524	AraC-like DNA-binding protein	8025822726	Paenibacillus sp. ClWae2A	1	240760	241524		8025822731	COG2207===AraC-type DNA-binding domain and AraC-containing proteins	pfam02311===AraC_binding<<>>pfam12833===HTH_18
8025826558	Ga0609718_06_58228_59958	AraC-like DNA-binding protein/ABC-type Fe3+-hydroxamate transport system substrate-binding protein	8025822726	Paenibacillus sp. ClWae2A	1	58228	59958		8025822731	COG2207===AraC-type DNA-binding domain and AraC-containing proteins<<>>COG0614===ABC-type Fe3+-hydroxamate transport system, periplasmic component	pfam12833===HTH_18<<>>pfam01497===Peripla_BP_2
8025823971	Ga0609718_02_34347_36011	AraC-like DNA-binding protein/ABC-type Fe3+-hydroxamate transport system substrate-binding protein	8025822726	Paenibacillus sp. ClWae2A	1	34347	36011		8025822727	COG2207===AraC-type DNA-binding domain and AraC-containing proteins<<>>COG0614===ABC-type Fe3+-hydroxamate transport system, periplasmic component	pfam02311===AraC_binding<<>>pfam01497===Peripla_BP_2<<>>pfam12833===HTH_18
8025826257	Ga0609718_05_99901_102306	AraC-like DNA-binding protein/HAMP domain-containing protein	8025822726	Paenibacillus sp. ClWae2A	1	99901	102306		8025822730	COG2770===HAMP domain<<>>COG2207===AraC-type DNA-binding domain and AraC-containing proteins	pfam17853===GGDEF_2<<>>pfam12833===HTH_18
8025825090	Ga0609718_03_73143_74039	AraC-like DNA-binding protein/mannose-6-phosphate isomerase-like protein (cupin superfamily)	8025822726	Paenibacillus sp. ClWae2A	1	73143	74039		8025822728	COG0662===Mannose-6-phosphate isomerase, cupin superfamily<<>>COG2207===AraC-type DNA-binding domain and AraC-containing proteins	pfam02311===AraC_binding<<>>pfam12833===HTH_18
8025823700	Ga0609718_01_1135602_1136453	AraC-like DNA-binding protein/mannose-6-phosphate isomerase-like protein (cupin superfamily)	8025822726	Paenibacillus sp. ClWae2A	1	1135602	1136453		8025822726	COG2207===AraC-type DNA-binding domain and AraC-containing proteins<<>>COG0662===Mannose-6-phosphate isomerase, cupin superfamily	pfam12833===HTH_18<<>>pfam02311===AraC_binding
8025827146	Ga0609718_08_46086_46502	archaellum component FlaC	8025822726	Paenibacillus sp. ClWae2A	1	46086	46502		8025822733	COG3352===Archaellum component FlaC
8025825853	Ga0609718_04_113419_114258	archaellum component FlaC	8025822726	Paenibacillus sp. ClWae2A	1	113419	114258		8025822729	COG3352===Archaellum component FlaC	pfam00015===MCPsignal
8025829179	Ga0609718_25_29976_30941	arginase	8025822726	Paenibacillus sp. ClWae2A	1	29976	30941		8025822750	COG0010===Arginase family enzyme	pfam00491===Arginase
8025828130	Ga0609718_13_81560_82741	arginase family enzyme	8025822726	Paenibacillus sp. ClWae2A	1	81560	82741		8025822738	COG0010===Arginase family enzyme	pfam00491===Arginase
8025823016	Ga0609718_01_348366_348500	arginase family enzyme	8025822726	Paenibacillus sp. ClWae2A	1	348366	348500		8025822726	COG0010===Arginase family enzyme
8025828832	Ga0609718_20_2867_4693	arginine decarboxylase	8025822726	Paenibacillus sp. ClWae2A	1	2867	4693		8025822745	COG1982===Arginine/lysine/ornithine decarboxylase	pfam01276===OKR_DC_1<<>>pfam03711===OKR_DC_1_C
8025825324	Ga0609718_03_326166_327653	arginine decarboxylase	8025822726	Paenibacillus sp. ClWae2A	1	326166	327653		8025822728	COG1982===Arginine/lysine/ornithine decarboxylase	pfam01276===OKR_DC_1<<>>pfam03711===OKR_DC_1_C
8025826132	Ga0609718_04_427142_428569	argininosuccinate lyase	8025822726	Paenibacillus sp. ClWae2A	1	427142	428569		8025822729	COG0165===Argininosuccinate lyase	pfam00206===Lyase_1<<>>pfam14698===ASL_C2
8025826131	Ga0609718_04_425824_427059	argininosuccinate synthase	8025822726	Paenibacillus sp. ClWae2A	1	425824	427059		8025822729	COG0137===Argininosuccinate synthase	pfam00764===Arginosuc_synth
8025824186	Ga0609718_02_233812_235542	arginyl-tRNA synthetase	8025822726	Paenibacillus sp. ClWae2A	1	233812	235542		8025822727	COG0018===Arginyl-tRNA synthetase	pfam03485===Arg_tRNA_synt_N<<>>pfam05746===DALR_1<<>>pfam00750===tRNA-synt_1d
8025829067	Ga0609718_23_32519_34198	arginyl-tRNA synthetase	8025822726	Paenibacillus sp. ClWae2A	1	32519	34198		8025822748	COG0018===Arginyl-tRNA synthetase	pfam00750===tRNA-synt_1d<<>>pfam03485===Arg_tRNA_synt_N<<>>pfam05746===DALR_1
8025823576	Ga0609718_01_1006336_1007682	aromatic amino acid permease	8025822726	Paenibacillus sp. ClWae2A	1	1006336	1007682		8025822726	COG1113===L-asparagine transporter and related permeases	pfam00324===AA_permease
8025827080	Ga0609718_07_301931_302413	ArpU family phage transcriptional regulator	8025822726	Paenibacillus sp. ClWae2A	1	301931	302413		8025822732
8025824863	Ga0609718_02_945622_945987	arsenate reductase	8025822726	Paenibacillus sp. ClWae2A	1	945622	945987		8025822727	COG1393===Arsenate reductase and related proteins, glutaredoxin family	pfam03960===ArsC
8025826624	Ga0609718_06_138376_139722	arsenical pump membrane protein	8025822726	Paenibacillus sp. ClWae2A	1	138376	139722		8025822731	COG1055===Na+/H+ antiporter NhaD or related arsenite permease	pfam02040===ArsB
8025828228	Ga0609718_14_6423_7715	arsenical pump membrane protein	8025822726	Paenibacillus sp. ClWae2A	1	6423	7715		8025822739	COG1055===Na+/H+ antiporter NhaD or related arsenite permease	pfam02040===ArsB
8025827706	Ga0609718_10_171521_171841	ArsR family transcriptional regulator	8025822726	Paenibacillus sp. ClWae2A	1	171521	171841		8025822735	COG0640===DNA-binding transcriptional regulator, ArsR family	pfam01022===HTH_5
8025823456	Ga0609718_01_874328_874630	ArsR family transcriptional regulator	8025822726	Paenibacillus sp. ClWae2A	1	874328	874630		8025822726	COG0640===DNA-binding transcriptional regulator, ArsR family	pfam01022===HTH_5
8025825751	Ga0609718_03_788940_791279	aryl carrier-like protein	8025822726	Paenibacillus sp. ClWae2A	1	788940	791279		8025822728	COG3433===Aryl carrier domain	pfam13193===AMP-binding_C<<>>pfam00501===AMP-binding<<>>pfam00550===PP-binding<<>>pfam00668===Condensation
8025824843	Ga0609718_02_923377_924354	aryl-alcohol dehydrogenase-like predicted oxidoreductase	8025822726	Paenibacillus sp. ClWae2A	1	923377	924354		8025822727	COG0667===Predicted oxidoreductase (related to aryl-alcohol dehydrogenase)	pfam00248===Aldo_ket_red
8025827478	Ga0609718_09_137496_138473	aryl-alcohol dehydrogenase-like predicted oxidoreductase	8025822726	Paenibacillus sp. ClWae2A	1	137496	138473		8025822734	COG0667===Predicted oxidoreductase (related to aryl-alcohol dehydrogenase)	pfam00248===Aldo_ket_red
8025824895	Ga0609718_02_981705_982685	aryl-alcohol dehydrogenase-like predicted oxidoreductase	8025822726	Paenibacillus sp. ClWae2A	1	981705	982685		8025822727	COG0667===Predicted oxidoreductase (related to aryl-alcohol dehydrogenase)	pfam00248===Aldo_ket_red
8025823577	Ga0609718_01_1008311_1008643	aryl-alcohol dehydrogenase-like predicted oxidoreductase	8025822726	Paenibacillus sp. ClWae2A	1	1008311	1008643		8025822726	COG0667===Predicted oxidoreductase (related to aryl-alcohol dehydrogenase)
8025828455	Ga0609718_15_57024_57932	aryl-alcohol dehydrogenase-like predicted oxidoreductase	8025822726	Paenibacillus sp. ClWae2A	1	57024	57932		8025822740	COG0667===Predicted oxidoreductase (related to aryl-alcohol dehydrogenase)	pfam00248===Aldo_ket_red
8025823030	Ga0609718_01_360949_361929	aryl-alcohol dehydrogenase-like predicted oxidoreductase	8025822726	Paenibacillus sp. ClWae2A	1	360949	361929		8025822726	COG0667===Predicted oxidoreductase (related to aryl-alcohol dehydrogenase)	pfam00248===Aldo_ket_red
8025828394	Ga0609718_15_304_1251	aryl-alcohol dehydrogenase-like predicted oxidoreductase	8025822726	Paenibacillus sp. ClWae2A	1	304	1251		8025822740	COG0667===Predicted oxidoreductase (related to aryl-alcohol dehydrogenase)	pfam00248===Aldo_ket_red
8025823053	Ga0609718_01_388883_389554	arylformamidase	8025822726	Paenibacillus sp. ClWae2A	1	388883	389554		8025822726	COG1878===Kynurenine formamidase	pfam04199===Cyclase
8025824797	Ga0609718_02_865862_867793	asparagine synthase (glutamine-hydrolysing)	8025822726	Paenibacillus sp. ClWae2A	1	865862	867793		8025822727	COG0367===Asparagine synthetase B (glutamine-hydrolyzing)	pfam13537===GATase_7<<>>pfam00733===Asn_synthase
8025826228	Ga0609718_05_61758_63632	asparagine synthase (glutamine-hydrolysing)	8025822726	Paenibacillus sp. ClWae2A	1	61758	63632		8025822730	COG0367===Asparagine synthetase B (glutamine-hydrolyzing)	pfam13537===GATase_7<<>>pfam00733===Asn_synthase
8025823854	Ga0609718_01_1330024_1331319	asparaginyl-tRNA synthetase	8025822726	Paenibacillus sp. ClWae2A	1	1330024	1331319		8025822726	COG0017===Aspartyl/asparaginyl-tRNA synthetase	pfam00152===tRNA-synt_2<<>>pfam01336===tRNA_anti-codon
8025823864	Ga0609718_01_1342431_1342814	aspartate 1-decarboxylase	8025822726	Paenibacillus sp. ClWae2A	1	1342431	1342814		8025822726	COG0853===Aspartate 1-decarboxylase	pfam02261===Asp_decarbox
8025828944	Ga0609718_21_55052_56485	aspartate ammonia-lyase	8025822726	Paenibacillus sp. ClWae2A	1	55052	56485		8025822746	COG1027===Aspartate ammonia-lyase	pfam00206===Lyase_1<<>>pfam10415===FumaraseC_C
8025825388	Ga0609718_03_382753_383667	aspartate carbamoyltransferase catalytic subunit	8025822726	Paenibacillus sp. ClWae2A	1	382753	383667		8025822728	COG0540===Aspartate carbamoyltransferase, catalytic chain	pfam00185===OTCace<<>>pfam02729===OTCace_N
8025825148	Ga0609718_03_126955_128208	aspartate kinase	8025822726	Paenibacillus sp. ClWae2A	1	126955	128208		8025822728	COG0527===Aspartokinase	pfam00696===AA_kinase<<>>pfam01842===ACT<<>>pfam13840===ACT_7
8025824223	Ga0609718_02_272287_273504	aspartate kinase	8025822726	Paenibacillus sp. ClWae2A	1	272287	273504		8025822727	COG0527===Aspartokinase	pfam00696===AA_kinase<<>>pfam13840===ACT_7
8025822838	Ga0609718_01_145624_146709	aspartate-semialdehyde dehydrogenase	8025822726	Paenibacillus sp. ClWae2A	1	145624	146709		8025822726	COG0136===Aspartate-semialdehyde dehydrogenase	pfam02774===Semialdhyde_dhC<<>>pfam01118===Semialdhyde_dh
8025826327	Ga0609718_05_178219_179517	aspartate/methionine/tyrosine aminotransferase	8025822726	Paenibacillus sp. ClWae2A	1	178219	179517		8025822730	COG0436===Aspartate/methionine/tyrosine aminotransferase	pfam00155===Aminotran_1_2
8025827130	Ga0609718_08_28526_30304	aspartyl-tRNA synthetase	8025822726	Paenibacillus sp. ClWae2A	1	28526	30304		8025822733	COG0173===Aspartyl-tRNA synthetase	pfam01336===tRNA_anti-codon<<>>pfam02938===GAD<<>>pfam00152===tRNA-synt_2
8025828818	Ga0609718_19_62350_63807	aspartyl-tRNA(Asn)/glutamyl-tRNA(Gln) amidotransferase subunit A	8025822726	Paenibacillus sp. ClWae2A	1	62350	63807		8025822744	COG0154===Asp-tRNAAsn/Glu-tRNAGln amidotransferase A subunit or related amidase	pfam01425===Amidase
8025827338	Ga0609718_08_271160_272536	aspartyl-tRNA(Asn)/glutamyl-tRNA(Gln) amidotransferase subunit A	8025822726	Paenibacillus sp. ClWae2A	1	271160	272536		8025822733	COG0154===Asp-tRNAAsn/Glu-tRNAGln amidotransferase A subunit or related amidase	pfam01425===Amidase
8025828819	Ga0609718_19_63834_65273	aspartyl-tRNA(Asn)/glutamyl-tRNA(Gln) amidotransferase subunit B	8025822726	Paenibacillus sp. ClWae2A	1	63834	65273		8025822744	COG0064===Asp-tRNAAsn/Glu-tRNAGln amidotransferase B subunit	pfam02637===GatB_Yqey<<>>pfam02934===GatB_N
8025828817	Ga0609718_19_62035_62322	aspartyl-tRNA(Asn)/glutamyl-tRNA(Gln) amidotransferase subunit C	8025822726	Paenibacillus sp. ClWae2A	1	62035	62322		8025822744	COG0721===Asp-tRNAAsn/Glu-tRNAGln amidotransferase C subunit	pfam02686===Glu-tRNAGln
8025826751	Ga0609718_06_286220_288352	assimilatory nitrate reductase catalytic subunit	8025822726	Paenibacillus sp. ClWae2A	1	286220	288352		8025822731	COG3383===Predicted molibdopterin-dependent oxidoreductase YjgC	pfam01568===Molydop_binding<<>>pfam04879===Molybdop_Fe4S4<<>>pfam00384===Molybdopterin
8025828035	Ga0609718_12_175690_176349	ATP phosphoribosyltransferase	8025822726	Paenibacillus sp. ClWae2A	1	175690	176349		8025822737	COG0040===ATP phosphoribosyltransferase	pfam01634===HisG
8025828036	Ga0609718_12_176351_177553	ATP phosphoribosyltransferase regulatory subunit	8025822726	Paenibacillus sp. ClWae2A	1	176351	177553		8025822737	COG3705===ATP phosphoribosyltransferase regulatory subunit HisZ	pfam13393===tRNA-synt_His
8025825989	Ga0609718_04_288720_289097	ATP synthase protein I	8025822726	Paenibacillus sp. ClWae2A	1	288720	289097		8025822729		pfam03899===ATP-synt_I
8025825988	Ga0609718_04_288473_288727	ATP synthase protein I	8025822726	Paenibacillus sp. ClWae2A	1	288473	288727		8025822729
8025825804	Ga0609718_04_59127_60854	ATP-binding cassette subfamily B multidrug efflux pump	8025822726	Paenibacillus sp. ClWae2A	1	59127	60854		8025822729	COG1132===ABC-type multidrug transport system, ATPase and permease component	pfam00005===ABC_tran<<>>pfam00664===ABC_membrane
8025828912	Ga0609718_21_14245_15987	ATP-binding cassette subfamily B multidrug efflux pump	8025822726	Paenibacillus sp. ClWae2A	1	14245	15987		8025822746	COG1132===ABC-type multidrug transport system, ATPase and permease component	pfam00664===ABC_membrane<<>>pfam00005===ABC_tran
8025828913	Ga0609718_21_15980_17797	ATP-binding cassette subfamily B multidrug efflux pump	8025822726	Paenibacillus sp. ClWae2A	1	15980	17797		8025822746	COG1132===ABC-type multidrug transport system, ATPase and permease component	pfam00664===ABC_membrane<<>>pfam00005===ABC_tran
8025826567	Ga0609718_06_67282_69066	ATP-binding cassette subfamily B multidrug efflux pump	8025822726	Paenibacillus sp. ClWae2A	1	67282	69066		8025822731	COG1132===ABC-type multidrug transport system, ATPase and permease component	pfam00005===ABC_tran<<>>pfam00664===ABC_membrane
8025824181	Ga0609718_02_228501_230591	ATP-binding cassette subfamily B multidrug efflux pump	8025822726	Paenibacillus sp. ClWae2A	1	228501	230591		8025822727	COG1132===ABC-type multidrug transport system, ATPase and permease component	pfam00005===ABC_tran<<>>pfam00664===ABC_membrane
8025823823	Ga0609718_01_1290744_1292516	ATP-binding cassette subfamily B multidrug efflux pump	8025822726	Paenibacillus sp. ClWae2A	1	1290744	1292516		8025822726	COG1132===ABC-type multidrug transport system, ATPase and permease component	pfam00005===ABC_tran<<>>pfam00664===ABC_membrane
8025823822	Ga0609718_01_1288897_1290747	ATP-binding cassette subfamily B multidrug efflux pump	8025822726	Paenibacillus sp. ClWae2A	1	1288897	1290747		8025822726	COG1132===ABC-type multidrug transport system, ATPase and permease component	pfam00005===ABC_tran<<>>pfam00664===ABC_membrane
8025826619	Ga0609718_06_132189_134027	ATP-binding cassette subfamily B multidrug efflux pump	8025822726	Paenibacillus sp. ClWae2A	1	132189	134027		8025822731	COG1132===ABC-type multidrug transport system, ATPase and permease component	pfam00664===ABC_membrane<<>>pfam00005===ABC_tran
8025826568	Ga0609718_06_69059_70891	ATP-binding cassette subfamily B multidrug efflux pump	8025822726	Paenibacillus sp. ClWae2A	1	69059	70891		8025822731	COG1132===ABC-type multidrug transport system, ATPase and permease component	pfam00005===ABC_tran<<>>pfam00664===ABC_membrane
8025825805	Ga0609718_04_60851_62728	ATP-binding cassette subfamily B multidrug efflux pump	8025822726	Paenibacillus sp. ClWae2A	1	60851	62728		8025822729	COG1132===ABC-type multidrug transport system, ATPase and permease component	pfam00005===ABC_tran<<>>pfam00664===ABC_membrane
8025826620	Ga0609718_06_134008_135816	ATP-binding cassette subfamily B multidrug efflux pump	8025822726	Paenibacillus sp. ClWae2A	1	134008	135816		8025822731	COG1132===ABC-type multidrug transport system, ATPase and permease component	pfam00005===ABC_tran<<>>pfam00664===ABC_membrane
8025824180	Ga0609718_02_226743_228488	ATP-binding cassette subfamily B multidrug efflux pump	8025822726	Paenibacillus sp. ClWae2A	1	226743	228488		8025822727	COG1132===ABC-type multidrug transport system, ATPase and permease component	pfam00005===ABC_tran<<>>pfam00664===ABC_membrane
8025822850	Ga0609718_01_163284_165053	ATP-binding cassette subfamily B protein	8025822726	Paenibacillus sp. ClWae2A	1	163284	165053		8025822726	COG1132===ABC-type multidrug transport system, ATPase and permease component	pfam00005===ABC_tran<<>>pfam00664===ABC_membrane
8025822849	Ga0609718_01_161542_163287	ATP-binding cassette subfamily B protein	8025822726	Paenibacillus sp. ClWae2A	1	161542	163287		8025822726	COG1132===ABC-type multidrug transport system, ATPase and permease component	pfam00005===ABC_tran<<>>pfam00664===ABC_membrane
8025822952	Ga0609718_01_283292_285010	ATP-binding cassette subfamily B protein	8025822726	Paenibacillus sp. ClWae2A	1	283292	285010		8025822726	COG1132===ABC-type multidrug transport system, ATPase and permease component	pfam00664===ABC_membrane<<>>pfam00005===ABC_tran
8025825914	Ga0609718_04_198329_200041	ATP-binding cassette subfamily B protein	8025822726	Paenibacillus sp. ClWae2A	1	198329	200041		8025822729	COG1132===ABC-type multidrug transport system, ATPase and permease component	pfam00664===ABC_membrane<<>>pfam00005===ABC_tran
8025825349	Ga0609718_03_342777_344492	ATP-binding cassette subfamily B protein	8025822726	Paenibacillus sp. ClWae2A	1	342777	344492		8025822728	COG1132===ABC-type multidrug transport system, ATPase and permease component	pfam00664===ABC_membrane<<>>pfam00005===ABC_tran
8025827133	Ga0609718_08_32938_34737	ATP-binding cassette subfamily B protein AbcA/BmrA	8025822726	Paenibacillus sp. ClWae2A	1	32938	34737		8025822733	COG1132===ABC-type multidrug transport system, ATPase and permease component	pfam00005===ABC_tran<<>>pfam00664===ABC_membrane
8025823145	Ga0609718_01_504523_506250	ATP-binding cassette subfamily C protein CydC	8025822726	Paenibacillus sp. ClWae2A	1	504523	506250		8025822726	COG4987===ABC-type transport system involved in cytochrome bd biosynthesis, fused ATPase and permease components	pfam00005===ABC_tran<<>>pfam00664===ABC_membrane
8025825760	Ga0609718_04_9964_11901	ATP-binding cassette subfamily C protein CydC	8025822726	Paenibacillus sp. ClWae2A	1	9964	11901		8025822729	COG4987===ABC-type transport system involved in cytochrome bd biosynthesis, fused ATPase and permease components	pfam00005===ABC_tran<<>>pfam00664===ABC_membrane
8025825759	Ga0609718_04_8052_9962	ATP-binding cassette subfamily C protein CydD	8025822726	Paenibacillus sp. ClWae2A	1	8052	9962		8025822729	COG4988===ABC-type transport system involved in cytochrome bd biosynthesis, ATPase and permease components	pfam00005===ABC_tran<<>>pfam00664===ABC_membrane
8025823144	Ga0609718_01_502703_504526	ATP-binding cassette subfamily C protein CydD	8025822726	Paenibacillus sp. ClWae2A	1	502703	504526		8025822726	COG4988===ABC-type transport system involved in cytochrome bd biosynthesis, ATPase and permease components	pfam00005===ABC_tran<<>>pfam00664===ABC_membrane
8025826974	Ga0609718_07_189378_191336	ATP-binding cassette subfamily F protein 3	8025822726	Paenibacillus sp. ClWae2A	1	189378	191336		8025822732	COG0488===ATPase components of ABC transporters with duplicated ATPase domains	pfam16326===ABC_tran_CTD<<>>pfam12848===ABC_tran_Xtn<<>>pfam00005===ABC_tran
8025824884	Ga0609718_02_967623_969515	ATP-binding cassette subfamily F protein 3	8025822726	Paenibacillus sp. ClWae2A	1	967623	969515		8025822727	COG0488===ATPase components of ABC transporters with duplicated ATPase domains	pfam00005===ABC_tran<<>>pfam12848===ABC_tran_Xtn
8025827391	Ga0609718_09_38683_40677	ATP-binding cassette subfamily F protein 3	8025822726	Paenibacillus sp. ClWae2A	1	38683	40677		8025822734	COG0488===ATPase components of ABC transporters with duplicated ATPase domains	pfam00005===ABC_tran<<>>pfam12848===ABC_tran_Xtn
8025823296	Ga0609718_01_695401_697140	ATP-binding cassette subfamily F protein 3	8025822726	Paenibacillus sp. ClWae2A	1	695401	697140		8025822726	COG0488===ATPase components of ABC transporters with duplicated ATPase domains	pfam00005===ABC_tran
8025824502	Ga0609718_02_580466_582397	ATP-binding cassette subfamily F protein uup	8025822726	Paenibacillus sp. ClWae2A	1	580466	582397		8025822727	COG0488===ATPase components of ABC transporters with duplicated ATPase domains	pfam00005===ABC_tran<<>>pfam12848===ABC_tran_Xtn<<>>pfam16326===ABC_tran_CTD
8025828957	Ga0609718_22_4036_5136	ATP-binding protein involved in chromosome partitioning	8025822726	Paenibacillus sp. ClWae2A	1	4036	5136		8025822747	COG0489===Chromosome partitioning ATPase, Mrp family, contains Fe-S cluster	pfam01883===FeS_assembly_P<<>>pfam10609===ParA
8025829025	Ga0609718_22_56801_59263	ATP-dependent Clp protease ATP-binding subunit ClpC	8025822726	Paenibacillus sp. ClWae2A	1	56801	59263		8025822747	COG0542===ATP-dependent Clp protease ATP-binding subunit ClpA	pfam02861===Clp_N<<>>pfam10431===ClpB_D2-small<<>>pfam17871===AAA_lid_9<<>>pfam07724===AAA_2<<>>pfam00004===AAA
8025826216	Ga0609718_05_47592_48845	ATP-dependent Clp protease ATP-binding subunit ClpX	8025822726	Paenibacillus sp. ClWae2A	1	47592	48845		8025822730	COG1219===ATP-dependent protease Clp, ATPase subunit	pfam10431===ClpB_D2-small<<>>pfam06689===zf-C4_ClpX<<>>pfam07724===AAA_2
8025826217	Ga0609718_05_48858_49448	ATP-dependent Clp protease protease subunit	8025822726	Paenibacillus sp. ClWae2A	1	48858	49448		8025822730	COG0740===ATP-dependent protease ClpP, protease subunit	pfam00574===CLP_protease
8025828009	Ga0609718_12_146242_146838	ATP-dependent Clp protease protease subunit	8025822726	Paenibacillus sp. ClWae2A	1	146242	146838		8025822737	COG0740===ATP-dependent protease ClpP, protease subunit	pfam00574===CLP_protease
8025826853	Ga0609718_07_69502_70083	ATP-dependent Clp protease protease subunit	8025822726	Paenibacillus sp. ClWae2A	1	69502	70083		8025822732	COG0740===ATP-dependent protease ClpP, protease subunit	pfam00574===CLP_protease
8025825195	Ga0609718_03_181317_183299	ATP-dependent DNA helicase DinG	8025822726	Paenibacillus sp. ClWae2A	1	181317	183299		8025822728	COG1199===Rad3-related DNA helicase	pfam13307===Helicase_C_2
8025823207	Ga0609718_01_572413_574434	ATP-dependent DNA helicase DinG	8025822726	Paenibacillus sp. ClWae2A	1	572413	574434		8025822726	COG1199===Rad3-related DNA helicase	pfam04851===ResIII<<>>pfam13307===Helicase_C_2
8025823862	Ga0609718_01_1338687_1341548	ATP-dependent DNA helicase DinG	8025822726	Paenibacillus sp. ClWae2A	1	1338687	1341548		8025822726	COG0847===DNA polymerase III, epsilon subunit or related 3'-5' exonuclease<<>>COG1199===Rad3-related DNA helicase	pfam00929===RNase_T<<>>pfam13307===Helicase_C_2<<>>pfam04851===ResIII
8025825261	Ga0609718_03_253115_255160	ATP-dependent DNA helicase RecG	8025822726	Paenibacillus sp. ClWae2A	1	253115	255160		8025822728	COG1200===RecG-like helicase	pfam00270===DEAD<<>>pfam17191===RecG_wedge<<>>pfam19833===RecG_C<<>>pfam00271===Helicase_C
8025828596	Ga0609718_16_84541_86421	ATP-dependent DNA helicase RecQ	8025822726	Paenibacillus sp. ClWae2A	1	84541	86421		8025822741	COG0514===Superfamily II DNA helicase RecQ	pfam00271===Helicase_C<<>>pfam00270===DEAD<<>>pfam16124===RecQ_Zn_bind<<>>pfam00570===HRDC<<>>pfam09382===RQC
8025824158	Ga0609718_02_202824_205343	ATP-dependent helicase HrpB	8025822726	Paenibacillus sp. ClWae2A	1	202824	205343		8025822727	COG1643===HrpA-like RNA helicase	pfam00270===DEAD<<>>pfam04408===HA2<<>>pfam08482===HrpB_C<<>>pfam00271===Helicase_C
8025825491	Ga0609718_03_492570_497000	ATP-dependent helicase/nuclease subunit A	8025822726	Paenibacillus sp. ClWae2A	1	492570	497000		8025822728	COG1074===ATP-dependent exoDNAse (exonuclease V) beta subunit (contains helicase and exonuclease domains)	pfam12705===PDDEXK_1<<>>pfam13361===UvrD_C<<>>pfam00580===UvrD-helicase
8025825492	Ga0609718_03_496997_500500	ATP-dependent helicase/nuclease subunit B	8025822726	Paenibacillus sp. ClWae2A	1	496997	500500		8025822728	COG3857===ATP-dependent helicase/DNAse subunit B	pfam04257===Exonuc_V_gamma<<>>pfam12705===PDDEXK_1
8025824288	Ga0609718_02_336162_337562	ATP-dependent HslUV protease ATP-binding subunit HslU	8025822726	Paenibacillus sp. ClWae2A	1	336162	337562		8025822727	COG1220===ATP-dependent protease HslVU (ClpYQ), ATPase subunit	pfam07724===AAA_2<<>>pfam10431===ClpB_D2-small<<>>pfam00004===AAA
8025824289	Ga0609718_02_337678_338220	ATP-dependent HslUV protease subunit HslV	8025822726	Paenibacillus sp. ClWae2A	1	337678	338220		8025822727	COG5405===ATP-dependent protease HslVU (ClpYQ), peptidase subunit	pfam00227===Proteasome
8025822798	Ga0609718_01_87022_89241	ATP-dependent Lhr-like helicase	8025822726	Paenibacillus sp. ClWae2A	1	87022	89241		8025822726	COG1201===Lhr-like helicase	pfam00270===DEAD<<>>pfam00271===Helicase_C
8025826213	Ga0609718_05_42026_44365	ATP-dependent Lon protease	8025822726	Paenibacillus sp. ClWae2A	1	42026	44365		8025822730	COG0466===ATP-dependent Lon protease, bacterial type	pfam02190===LON_substr_bdg<<>>pfam00004===AAA<<>>pfam05362===Lon_C
8025824220	Ga0609718_02_268207_269007	ATP-dependent protease ClpP protease subunit	8025822726	Paenibacillus sp. ClWae2A	1	268207	269007		8025822727	COG0740===ATP-dependent protease ClpP, protease subunit	pfam00574===CLP_protease
8025825889	Ga0609718_04_153528_155135	ATP-dependent RNA helicase DeaD	8025822726	Paenibacillus sp. ClWae2A	1	153528	155135		8025822729	COG0513===Superfamily II DNA and RNA helicase	pfam00271===Helicase_C<<>>pfam00270===DEAD
8025827896	Ga0609718_11_188816_190261	ATP-dependent RNA helicase DeaD	8025822726	Paenibacillus sp. ClWae2A	1	188816	190261		8025822736	COG0513===Superfamily II DNA and RNA helicase	pfam00270===DEAD<<>>pfam00271===Helicase_C<<>>pfam03880===DbpA
8025826331	Ga0609718_05_182069_183469	ATP-dependent RNA helicase DeaD	8025822726	Paenibacillus sp. ClWae2A	1	182069	183469		8025822730	COG0513===Superfamily II DNA and RNA helicase	pfam00271===Helicase_C<<>>pfam00270===DEAD
8025824486	Ga0609718_02_563727_565322	ATP-dependent RNA helicase DeaD	8025822726	Paenibacillus sp. ClWae2A	1	563727	565322		8025822727	COG0513===Superfamily II DNA and RNA helicase	pfam00271===Helicase_C<<>>pfam00270===DEAD
8025822960	Ga0609718_01_290074_291480	ATP-dependent RNA helicase RhlE	8025822726	Paenibacillus sp. ClWae2A	1	290074	291480		8025822726	COG0513===Superfamily II DNA and RNA helicase	pfam00270===DEAD<<>>pfam00271===Helicase_C
8025827215	Ga0609718_08_131132_132436	ATP-dependent Zn protease	8025822726	Paenibacillus sp. ClWae2A	1	131132	132436		8025822733	COG0465===ATP-dependent Zn proteases	pfam00004===AAA
8025823628	Ga0609718_01_1060722_1062272	ATPase subunit of ABC transporter with duplicated ATPase domains	8025822726	Paenibacillus sp. ClWae2A	1	1060722	1062272		8025822726	COG0488===ATPase components of ABC transporters with duplicated ATPase domains	pfam00005===ABC_tran<<>>pfam12848===ABC_tran_Xtn
8025822782	Ga0609718_01_62295_63851	ATPase subunit of ABC transporter with duplicated ATPase domains	8025822726	Paenibacillus sp. ClWae2A	1	62295	63851		8025822726	COG0488===ATPase components of ABC transporters with duplicated ATPase domains	pfam12848===ABC_tran_Xtn<<>>pfam00005===ABC_tran
8025828780	Ga0609718_19_28665_30290	ATPase subunit of ABC transporter with duplicated ATPase domains	8025822726	Paenibacillus sp. ClWae2A	1	28665	30290		8025822744	COG0488===ATPase components of ABC transporters with duplicated ATPase domains	pfam00005===ABC_tran<<>>pfam12848===ABC_tran_Xtn
8025828158	Ga0609718_13_110354_113074	autotransporter-associated beta strand protein	8025822726	Paenibacillus sp. ClWae2A	1	110354	113074		8025822738		pfam01569===PAP2<<>>pfam00395===SLH<<>>pfam12951===PATR
8025827077	Ga0609718_07_298645_299220	azobenzene reductase	8025822726	Paenibacillus sp. ClWae2A	1	298645	299220		8025822732	COG0431===NAD(P)H-dependent FMN reductase	pfam03358===FMN_red
8025825431	Ga0609718_03_428815_430446	bacillithiol biosynthesis cysteine-adding enzyme BshC	8025822726	Paenibacillus sp. ClWae2A	1	428815	430446		8025822728	COG4365===Uncharacterized protein YllA, UPF0747 family	pfam10079===BshC
8025823871	Ga0609718_01_1348508_1349206	bacillithiol biosynthesis deacetylase BshB1	8025822726	Paenibacillus sp. ClWae2A	1	1348508	1349206		8025822726	COG2120===N-acetylglucosaminyl deacetylase, LmbE family	pfam02585===PIG-L
8025823004	Ga0609718_01_337494_338192	bacillithiol biosynthesis deacetylase BshB2	8025822726	Paenibacillus sp. ClWae2A	1	337494	338192		8025822726	COG2120===N-acetylglucosaminyl deacetylase, LmbE family	pfam02585===PIG-L
8025825310	Ga0609718_03_312637_312984	bacillithiol system protein YtxJ	8025822726	Paenibacillus sp. ClWae2A	1	312637	312984		8025822728		pfam11009===DUF2847
8025827934	Ga0609718_12_51478_52017	bacillithiol system protein YtxJ	8025822726	Paenibacillus sp. ClWae2A	1	51478	52017		8025822737		pfam11009===DUF2847
8025826319	Ga0609718_05_164831_166396	bacillolysin	8025822726	Paenibacillus sp. ClWae2A	1	164831	166396		8025822730	COG3227===Zn-dependent metalloprotease	pfam02868===Peptidase_M4_C<<>>pfam07504===FTP<<>>pfam01447===Peptidase_M4
8025822884	Ga0609718_01_209380_214626	bacillopeptidase F (M6 metalloprotease family)/subtilisin family serine protease	8025822726	Paenibacillus sp. ClWae2A	1	209380	214626		8025822726	COG4412===Bacillopeptidase F, M6 metalloprotease family<<>>COG1404===Serine protease, subtilisin family	pfam05922===Inhibitor_I9<<>>pfam05547===Peptidase_M6<<>>pfam00082===Peptidase_S8<<>>pfam09136===Glucodextran_B<<>>pfam13715===CarbopepD_reg_2
8025824974	Ga0609718_02_1063651_1064406	bacitracin transport system ATP-binding protein	8025822726	Paenibacillus sp. ClWae2A	1	1063651	1064406		8025822727	COG1136===ABC-type lipoprotein export system, ATPase component	pfam00005===ABC_tran
8025824973	Ga0609718_02_1061729_1063654	bacitracin transport system permease protein	8025822726	Paenibacillus sp. ClWae2A	1	1061729	1063654		8025822727	COG0577===ABC-type antimicrobial peptide transport system, permease component	pfam02687===FtsX
8025828273	Ga0609718_14_47759_48814	basic membrane protein A	8025822726	Paenibacillus sp. ClWae2A	1	47759	48814		8025822739	COG1744===Basic membrane lipoprotein Med, periplasmic binding protein (PBP1-ABC) superfamily	pfam02608===Bmp
8025824905	Ga0609718_02_993656_994696	basic membrane protein A	8025822726	Paenibacillus sp. ClWae2A	1	993656	994696		8025822727	COG1744===Basic membrane lipoprotein Med, periplasmic binding protein (PBP1-ABC) superfamily	pfam02608===Bmp
8025828147	Ga0609718_13_98574_99581	basic membrane protein A	8025822726	Paenibacillus sp. ClWae2A	1	98574	99581		8025822738	COG1744===Basic membrane lipoprotein Med, periplasmic binding protein (PBP1-ABC) superfamily	pfam02608===Bmp
8025822840	Ga0609718_01_147361_148335	BASS family bile acid:Na+ symporter	8025822726	Paenibacillus sp. ClWae2A	1	147361	148335		8025822726	COG0385===Predicted Na+-dependent transporter	pfam01758===SBF
8025822883	Ga0609718_01_207362_208726	BclB C-terminal domain-containing protein	8025822726	Paenibacillus sp. ClWae2A	1	207362	208726		8025822726		pfam01391===Collagen
8025825639	Ga0609718_03_659172_660596	BclB C-terminal domain-containing protein	8025822726	Paenibacillus sp. ClWae2A	1	659172	660596		8025822728		pfam01391===Collagen
8025824977	Ga0609718_02_1066399_1067169	benzil reductase ((S)-benzoin forming)	8025822726	Paenibacillus sp. ClWae2A	1	1066399	1067169		8025822727	COG1028===NAD(P)-dependent dehydrogenase, short-chain alcohol dehydrogenase family	pfam00106===adh_short
8025823067	Ga0609718_01_402093_403298	benzoate membrane transport protein	8025822726	Paenibacillus sp. ClWae2A	1	402093	403298		8025822726	COG3135===Predicted benzoate:H+ symporter BenE	pfam03594===BenE
8025828104	Ga0609718_13_54079_54837	benzodiazapine receptor	8025822726	Paenibacillus sp. ClWae2A	1	54079	54837		8025822738	COG3476===Tryptophan-rich sensory protein (mitochondrial benzodiazepine receptor homolog)	pfam03073===TspO_MBR
8025827404	Ga0609718_09_52061_53098	beta-1,4-mannooligosaccharide/beta-1,4-mannosyl-N-acetylglucosamine phosphorylase	8025822726	Paenibacillus sp. ClWae2A	1	52061	53098		8025822734	COG2152===Predicted glycosyl hydrolase, GH43/DUF377 family	pfam04041===Glyco_hydro_130
8025827660	Ga0609718_10_115504_117684	beta-D-galactosyl-(1->4)-L-rhamnose phosphorylase	8025822726	Paenibacillus sp. ClWae2A	1	115504	117684		8025822735		pfam09508===Lact_bio_phlase<<>>pfam17385===LBP_M<<>>pfam17386===LBP_C
8025828429	Ga0609718_15_34458_36020	beta-fructofuranosidase	8025822726	Paenibacillus sp. ClWae2A	1	34458	36020		8025822740	COG1621===Sucrose-6-phosphate hydrolase SacC, GH32 family	pfam08244===Glyco_hydro_32C<<>>pfam00251===Glyco_hydro_32N
8025822812	Ga0609718_01_115000_116475	beta-fructofuranosidase	8025822726	Paenibacillus sp. ClWae2A	1	115000	116475		8025822726	COG1621===Sucrose-6-phosphate hydrolase SacC, GH32 family	pfam00251===Glyco_hydro_32N<<>>pfam08244===Glyco_hydro_32C
8025825929	Ga0609718_04_218302_220305	beta-galactosidase	8025822726	Paenibacillus sp. ClWae2A	1	218302	220305		8025822729	COG1874===Beta-galactosidase GanA	pfam02449===Glyco_hydro_42<<>>pfam08532===Glyco_hydro_42M
8025824351	Ga0609718_02_404423_406450	beta-galactosidase	8025822726	Paenibacillus sp. ClWae2A	1	404423	406450		8025822727	COG1874===Beta-galactosidase GanA	pfam02449===Glyco_hydro_42<<>>pfam08532===Glyco_hydro_42M<<>>pfam08533===Glyco_hydro_42C
8025826960	Ga0609718_07_176852_179971	beta-galactosidase	8025822726	Paenibacillus sp. ClWae2A	1	176852	179971		8025822732	COG3250===Beta-galactosidase/beta-glucuronidase	pfam00703===Glyco_hydro_2<<>>pfam16353===DUF4981<<>>pfam02837===Glyco_hydro_2_N<<>>pfam02836===Glyco_hydro_2_C<<>>pfam02929===Bgal_small_N
8025828466	Ga0609718_15_67704_70613	beta-galactosidase	8025822726	Paenibacillus sp. ClWae2A	1	67704	70613		8025822740		pfam02836===Glyco_hydro_2_C<<>>pfam02837===Glyco_hydro_2_N<<>>pfam00703===Glyco_hydro_2
8025826681	Ga0609718_06_192096_195569	beta-galactosidase	8025822726	Paenibacillus sp. ClWae2A	1	192096	195569		8025822731		pfam00703===Glyco_hydro_2<<>>pfam02837===Glyco_hydro_2_N<<>>pfam16355===DUF4982<<>>pfam02836===Glyco_hydro_2_C<<>>pfam18565===Glyco_hydro2_C5
8025824340	Ga0609718_02_387168_390215	beta-galactosidase	8025822726	Paenibacillus sp. ClWae2A	1	387168	390215		8025822727	COG3250===Beta-galactosidase/beta-glucuronidase	pfam02836===Glyco_hydro_2_C<<>>pfam16353===DUF4981<<>>pfam02929===Bgal_small_N<<>>pfam00703===Glyco_hydro_2<<>>pfam02837===Glyco_hydro_2_N
8025822806	Ga0609718_01_104371_106710	beta-galactosidase	8025822726	Paenibacillus sp. ClWae2A	1	104371	106710		8025822726		pfam10435===BetaGal_dom2<<>>pfam01301===Glyco_hydro_35
8025827950	Ga0609718_12_72841_74598	beta-galactosidase	8025822726	Paenibacillus sp. ClWae2A	1	72841	74598		8025822737	COG1874===Beta-galactosidase GanA	pfam01301===Glyco_hydro_35
8025825738	Ga0609718_03_774044_777082	beta-galactosidase	8025822726	Paenibacillus sp. ClWae2A	1	774044	777082		8025822728		pfam01301===Glyco_hydro_35
8025826298	Ga0609718_05_139660_141768	beta-galactosidase	8025822726	Paenibacillus sp. ClWae2A	1	139660	141768		8025822730	COG1874===Beta-galactosidase GanA	pfam08533===Glyco_hydro_42C<<>>pfam08532===Glyco_hydro_42M<<>>pfam02449===Glyco_hydro_42
8025824007	Ga0609718_02_72180_74174	beta-galactosidase	8025822726	Paenibacillus sp. ClWae2A	1	72180	74174		8025822727	COG1874===Beta-galactosidase GanA	pfam02449===Glyco_hydro_42<<>>pfam08533===Glyco_hydro_42C<<>>pfam08532===Glyco_hydro_42M
8025824390	Ga0609718_02_454663_456735	beta-galactosidase	8025822726	Paenibacillus sp. ClWae2A	1	454663	456735		8025822727	COG1874===Beta-galactosidase GanA	pfam08533===Glyco_hydro_42C<<>>pfam08532===Glyco_hydro_42M<<>>pfam02449===Glyco_hydro_42
8025823263	Ga0609718_01_646602_648626	beta-galactosidase	8025822726	Paenibacillus sp. ClWae2A	1	646602	648626		8025822726	COG1874===Beta-galactosidase GanA	pfam02449===Glyco_hydro_42<<>>pfam08532===Glyco_hydro_42M
8025823224	Ga0609718_01_593814_598271	beta-glucanase (GH16 family)	8025822726	Paenibacillus sp. ClWae2A	1	593814	598271		8025822726	COG2273===Beta-glucanase, GH16 family	pfam00395===SLH<<>>pfam02018===CBM_4_9<<>>pfam00722===Glyco_hydro_16<<>>pfam03422===CBM_6
8025823384	Ga0609718_01_801895_803943	beta-glucanase (GH16 family)	8025822726	Paenibacillus sp. ClWae2A	1	801895	803943		8025822726	COG2273===Beta-glucanase, GH16 family	pfam00722===Glyco_hydro_16
8025827956	Ga0609718_12_77691_80474	beta-glucosidase	8025822726	Paenibacillus sp. ClWae2A	1	77691	80474		8025822737	COG1472===Periplasmic beta-glucosidase and related glycosidases	pfam00933===Glyco_hydro_3<<>>pfam01915===Glyco_hydro_3_C<<>>pfam14310===Fn3-like
8025827942	Ga0609718_12_59771_62083	beta-glucosidase	8025822726	Paenibacillus sp. ClWae2A	1	59771	62083		8025822737	COG1472===Periplasmic beta-glucosidase and related glycosidases	pfam00933===Glyco_hydro_3<<>>pfam01915===Glyco_hydro_3_C<<>>pfam14310===Fn3-like
8025823299	Ga0609718_01_699875_702160	beta-glucosidase	8025822726	Paenibacillus sp. ClWae2A	1	699875	702160		8025822726	COG1472===Periplasmic beta-glucosidase and related glycosidases	pfam00933===Glyco_hydro_3<<>>pfam01915===Glyco_hydro_3_C<<>>pfam14310===Fn3-like
8025825852	Ga0609718_04_110501_113323	beta-glucosidase	8025822726	Paenibacillus sp. ClWae2A	1	110501	113323		8025822729	COG1472===Periplasmic beta-glucosidase and related glycosidases	pfam03422===CBM_6<<>>pfam00933===Glyco_hydro_3<<>>pfam14310===Fn3-like<<>>pfam01915===Glyco_hydro_3_C
8025826354	Ga0609718_05_214858_217215	beta-glucosidase	8025822726	Paenibacillus sp. ClWae2A	1	214858	217215		8025822730	COG1472===Periplasmic beta-glucosidase and related glycosidases	pfam14310===Fn3-like<<>>pfam00933===Glyco_hydro_3<<>>pfam01915===Glyco_hydro_3_C
8025828473	Ga0609718_15_81356_82717	beta-glucosidase	8025822726	Paenibacillus sp. ClWae2A	1	81356	82717		8025822740	COG2723===Beta-glucosidase/6-phospho-beta-glucosidase/beta-galactosidase	pfam00232===Glyco_hydro_1
8025824816	Ga0609718_02_891993_894158	beta-glucosidase	8025822726	Paenibacillus sp. ClWae2A	1	891993	894158		8025822727	COG1472===Periplasmic beta-glucosidase and related glycosidases	pfam01915===Glyco_hydro_3_C<<>>pfam00933===Glyco_hydro_3<<>>pfam14310===Fn3-like
8025823190	Ga0609718_01_553017_553859	beta-glucoside operon transcriptional antiterminator	8025822726	Paenibacillus sp. ClWae2A	1	553017	553859		8025822726	COG3711===Transcriptional antiterminator	pfam00874===PRD<<>>pfam03123===CAT_RBD
8025825701	Ga0609718_03_734228_735079	beta-glucoside operon transcriptional antiterminator	8025822726	Paenibacillus sp. ClWae2A	1	734228	735079		8025822728	COG3711===Transcriptional antiterminator	pfam00874===PRD<<>>pfam03123===CAT_RBD
8025827913	Ga0609718_12_24096_24932	beta-glucoside operon transcriptional antiterminator	8025822726	Paenibacillus sp. ClWae2A	1	24096	24932		8025822737	COG3711===Transcriptional antiterminator	pfam00874===PRD<<>>pfam03123===CAT_RBD
8025823834	Ga0609718_01_1308900_1309739	beta-glucoside operon transcriptional antiterminator	8025822726	Paenibacillus sp. ClWae2A	1	1308900	1309739		8025822726	COG3711===Transcriptional antiterminator	pfam00874===PRD<<>>pfam03123===CAT_RBD
8025822818	Ga0609718_01_124457_125344	beta-glucoside operon transcriptional antiterminator	8025822726	Paenibacillus sp. ClWae2A	1	124457	125344		8025822726	COG3711===Transcriptional antiterminator	pfam00874===PRD<<>>pfam03123===CAT_RBD
8025823160	Ga0609718_01_522376_523224	beta-glucoside operon transcriptional antiterminator	8025822726	Paenibacillus sp. ClWae2A	1	522376	523224		8025822726	COG3711===Transcriptional antiterminator	pfam00874===PRD<<>>pfam03123===CAT_RBD
8025823721	Ga0609718_01_1179438_1180280	beta-glucoside operon transcriptional antiterminator	8025822726	Paenibacillus sp. ClWae2A	1	1179438	1180280		8025822726	COG3711===Transcriptional antiterminator	pfam03123===CAT_RBD<<>>pfam00874===PRD
8025823732	Ga0609718_01_1191989_1192831	beta-glucoside operon transcriptional antiterminator	8025822726	Paenibacillus sp. ClWae2A	1	1191989	1192831		8025822726	COG3711===Transcriptional antiterminator	pfam03123===CAT_RBD<<>>pfam00874===PRD
8025823314	Ga0609718_01_725012_725863	beta-glucoside operon transcriptional antiterminator	8025822726	Paenibacillus sp. ClWae2A	1	725012	725863		8025822726	COG3711===Transcriptional antiterminator	pfam03123===CAT_RBD<<>>pfam00874===PRD
8025823323	Ga0609718_01_736256_737950	beta-glucuronidase	8025822726	Paenibacillus sp. ClWae2A	1	736256	737950		8025822726	COG3250===Beta-galactosidase/beta-glucuronidase	pfam02837===Glyco_hydro_2_N<<>>pfam00703===Glyco_hydro_2<<>>pfam02836===Glyco_hydro_2_C
8025825863	Ga0609718_04_125260_126120	beta-lactamase regulating signal transducer with metallopeptidase domain	8025822726	Paenibacillus sp. ClWae2A	1	125260	126120		8025822729	COG4219===Signal transducer regulating beta-lactamase production, contains metallopeptidase domain	pfam05569===Peptidase_M56
8025824416	Ga0609718_02_483350_485926	beta-mannosidase	8025822726	Paenibacillus sp. ClWae2A	1	483350	485926		8025822727	COG3250===Beta-galactosidase/beta-glucuronidase	pfam17753===Ig_mannosidase<<>>pfam00703===Glyco_hydro_2<<>>pfam02837===Glyco_hydro_2_N<<>>pfam17786===Mannosidase_ig
8025824015	Ga0609718_02_81324_83873	beta-mannosidase	8025822726	Paenibacillus sp. ClWae2A	1	81324	83873		8025822727	COG3250===Beta-galactosidase/beta-glucuronidase	pfam17786===Mannosidase_ig<<>>pfam00703===Glyco_hydro_2<<>>pfam17753===Ig_mannosidase
8025822750	Ga0609718_01_30128_31456	beta-N-acetylhexosaminidase	8025822726	Paenibacillus sp. ClWae2A	1	30128	31456		8025822726	COG1472===Periplasmic beta-glucosidase and related glycosidases	pfam00933===Glyco_hydro_3
8025823133	Ga0609718_01_490370_492631	beta-N-acetylhexosaminidase	8025822726	Paenibacillus sp. ClWae2A	1	490370	492631		8025822726	COG1472===Periplasmic beta-glucosidase and related glycosidases	pfam00933===Glyco_hydro_3<<>>pfam00395===SLH
8025828619	Ga0609718_17_15057_16778	beta-N-acetylhexosaminidase	8025822726	Paenibacillus sp. ClWae2A	1	15057	16778		8025822742	COG1472===Periplasmic beta-glucosidase and related glycosidases	pfam00933===Glyco_hydro_3
8025825167	Ga0609718_03_147694_149349	beta-N-acetylhexosaminidase	8025822726	Paenibacillus sp. ClWae2A	1	147694	149349		8025822728	COG1472===Periplasmic beta-glucosidase and related glycosidases	pfam00933===Glyco_hydro_3
8025828358	Ga0609718_14_140692_142410	beta-N-acetylhexosaminidase	8025822726	Paenibacillus sp. ClWae2A	1	140692	142410		8025822739	COG1472===Periplasmic beta-glucosidase and related glycosidases	pfam00933===Glyco_hydro_3
8025823707	Ga0609718_01_1143194_1143931	beta-phosphoglucomutase family hydrolase	8025822726	Paenibacillus sp. ClWae2A	1	1143194	1143931		8025822726	COG0637===Beta-phosphoglucomutase or related phosphatase, HAD superfamily	pfam13419===HAD_2
8025825946	Ga0609718_04_241102_241983	beta-ureidopropionase	8025822726	Paenibacillus sp. ClWae2A	1	241102	241983		8025822729	COG0388===Predicted amidohydrolase	pfam00795===CN_hydrolase
8025823205	Ga0609718_01_570774_571715	beta-xylosidase	8025822726	Paenibacillus sp. ClWae2A	1	570774	571715		8025822726	COG3507===Beta-xylosidase	pfam04616===Glyco_hydro_43
8025825642	Ga0609718_03_663837_665900	beta-xylosidase	8025822726	Paenibacillus sp. ClWae2A	1	663837	665900		8025822728	COG3507===Beta-xylosidase	pfam04616===Glyco_hydro_43<<>>pfam02018===CBM_4_9<<>>pfam17851===GH43_C2
8025823395	Ga0609718_01_810528_811523	beta-xylosidase	8025822726	Paenibacillus sp. ClWae2A	1	810528	811523		8025822726	COG3507===Beta-xylosidase	pfam04616===Glyco_hydro_43
8025823085	Ga0609718_01_422655_424205	beta-xylosidase	8025822726	Paenibacillus sp. ClWae2A	1	422655	424205		8025822726	COG3507===Beta-xylosidase	pfam04616===Glyco_hydro_43<<>>pfam17851===GH43_C2
8025826989	Ga0609718_07_203656_204546	bifunctional non-homologous end joining protein LigD	8025822726	Paenibacillus sp. ClWae2A	1	203656	204546		8025822732	COG3285===Eukaryotic-type DNA primase
8025826988	Ga0609718_07_202666_203616	bifunctional non-homologous end joining protein LigD	8025822726	Paenibacillus sp. ClWae2A	1	202666	203616		8025822732	COG1793===ATP-dependent DNA ligase	pfam01068===DNA_ligase_A_M<<>>pfam04679===DNA_ligase_A_C
8025828857	Ga0609718_20_23764_25164	bifunctional UDP-N-acetylglucosamine pyrophosphorylase/glucosamine-1-phosphate N-acetyltransferase	8025822726	Paenibacillus sp. ClWae2A	1	23764	25164		8025822745	COG1207===Bifunctional protein GlmU, N-acetylglucosamine-1-phosphate-uridyltransferase/glucosamine-1-phosphate-acetyltransferase	pfam12804===NTP_transf_3<<>>pfam14602===Hexapep_2
8025825243	Ga0609718_03_230046_231446	biofilm PGA synthesis N-glycosyltransferase PgaC	8025822726	Paenibacillus sp. ClWae2A	1	230046	231446		8025822728	COG1215===Glycosyltransferase, catalytic subunit of cellulose synthase and poly-beta-1,6-N-acetylglucosamine synthase	pfam13641===Glyco_tranf_2_3
8025826528	Ga0609718_06_25016_25648	biopolymer transport protein ExbD	8025822726	Paenibacillus sp. ClWae2A	1	25016	25648		8025822731	COG0848===Biopolymer transport protein ExbD	pfam07833===Cu_amine_oxidN1
8025828786	Ga0609718_19_33708_34241	biopolymer transport protein ExbD	8025822726	Paenibacillus sp. ClWae2A	1	33708	34241		8025822744	COG0848===Biopolymer transport protein ExbD
8025826629	Ga0609718_06_143119_144168	biotin carboxylase	8025822726	Paenibacillus sp. ClWae2A	1	143119	144168		8025822731	COG0439===Biotin carboxylase	pfam15632===ATPgrasp_Ter
8025828323	Ga0609718_14_100384_101625	biotin carboxylase	8025822726	Paenibacillus sp. ClWae2A	1	100384	101625		8025822739	COG0439===Biotin carboxylase	pfam07478===Dala_Dala_lig_C<<>>pfam18603===LAL_C2
8025822821	Ga0609718_01_129532_130122	biotin transport system substrate-specific component	8025822726	Paenibacillus sp. ClWae2A	1	129532	130122		8025822726	COG1268===Biotin transporter BioY	pfam02632===BioY
8025823868	Ga0609718_01_1344923_1345900	BirA family biotin operon repressor/biotin-[acetyl-CoA-carboxylase] ligase	8025822726	Paenibacillus sp. ClWae2A	1	1344923	1345900		8025822726	COG0340===Biotin-(acetyl-CoA carboxylase) ligase<<>>COG1654===Biotin operon repressor	pfam02237===BPL_C<<>>pfam03099===BPL_LplA_LipB<<>>pfam08279===HTH_11
8025824949	Ga0609718_02_1036396_1037748	bla regulator protein BlaR1	8025822726	Paenibacillus sp. ClWae2A	1	1036396	1037748		8025822727	COG4219===Signal transducer regulating beta-lactamase production, contains metallopeptidase domain	pfam05569===Peptidase_M56
8025824948	Ga0609718_02_1036015_1036389	BlaI family penicillinase repressor	8025822726	Paenibacillus sp. ClWae2A	1	1036015	1036389		8025822727	COG3682===Predicted transcriptional regulator	pfam03965===Penicillinase_R
8025826173	Ga0609718_05_2444_3328	branched-chain amino acid aminotransferase	8025822726	Paenibacillus sp. ClWae2A	1	2444	3328		8025822730	COG0115===Branched-chain amino acid aminotransferase/4-amino-4-deoxychorismate lyase	pfam01063===Aminotran_4
8025827675	Ga0609718_10_135110_136339	branched-chain amino acid transport system substrate-binding protein	8025822726	Paenibacillus sp. ClWae2A	1	135110	136339		8025822735	COG0683===ABC-type branched-chain amino acid transport system, periplasmic component	pfam13458===Peripla_BP_6
8025828352	Ga0609718_14_131644_131973	branched-subunit amino acid transport protein	8025822726	Paenibacillus sp. ClWae2A	1	131644	131973		8025822739	COG4392===Branched-chain amino acid transport protein	pfam05437===AzlD
8025823345	Ga0609718_01_758562_759194	broad specificity phosphatase PhoE	8025822726	Paenibacillus sp. ClWae2A	1	758562	759194		8025822726	COG0406===Broad specificity phosphatase PhoE	pfam00300===His_Phos_1
8025828517	Ga0609718_16_15925_16539	broad specificity phosphatase PhoE	8025822726	Paenibacillus sp. ClWae2A	1	15925	16539		8025822741	COG0406===Broad specificity phosphatase PhoE	pfam00300===His_Phos_1
8025825022	Ga0609718_02_1100168_1100743	broad specificity phosphatase PhoE	8025822726	Paenibacillus sp. ClWae2A	1	1100168	1100743		8025822727	COG0406===Broad specificity phosphatase PhoE	pfam00300===His_Phos_1
8025826601	Ga0609718_06_108265_108891	broad specificity phosphatase PhoE	8025822726	Paenibacillus sp. ClWae2A	1	108265	108891		8025822731	COG0406===Broad specificity phosphatase PhoE	pfam00300===His_Phos_1
8025827344	Ga0609718_08_280956_281504	broad specificity phosphatase PhoE	8025822726	Paenibacillus sp. ClWae2A	1	280956	281504		8025822733	COG0406===Broad specificity phosphatase PhoE	pfam00300===His_Phos_1
8025823549	Ga0609718_01_978174_978668	broad-specificity NMP kinase	8025822726	Paenibacillus sp. ClWae2A	1	978174	978668		8025822726	COG1936===Broad-specificity NMP kinase
8025828591	Ga0609718_16_79431_79928	broad-specificity NMP kinase	8025822726	Paenibacillus sp. ClWae2A	1	79431	79928		8025822741	COG1936===Broad-specificity NMP kinase	pfam13238===AAA_18
8025827783	Ga0609718_11_50259_52250	c-di-AMP phosphodiesterase-like protein	8025822726	Paenibacillus sp. ClWae2A	1	50259	52250		8025822736	COG3887===c-di-AMP phosphodiesterase, consists of a GGDEF-like and DHH domains	pfam01368===DHH<<>>pfam02272===DHHA1
8025823928	Ga0609718_01_1398352_1399005	c-di-GMP-binding flagellar brake protein YcgR	8025822726	Paenibacillus sp. ClWae2A	1	1398352	1399005		8025822726	COG5581===c-di-GMP-binding flagellar brake protein YcgR, contains PilZNR and PilZ domains	pfam07238===PilZ<<>>pfam12945===YcgR_2
8025825895	Ga0609718_04_165084_166367	Ca-activated chloride channel family protein	8025822726	Paenibacillus sp. ClWae2A	1	165084	166367		8025822729	COG4245===Uncharacterized conserved protein YegL, contains vWA domain of TerY type	pfam00092===VWA
8025828874	Ga0609718_20_43061_43813	Ca-activated chloride channel family protein	8025822726	Paenibacillus sp. ClWae2A	1	43061	43813		8025822745	COG1240===Mg-chelatase subunit ChlD	pfam13519===VWA_2
8025825892	Ga0609718_04_156970_158763	Ca-activated chloride channel family protein	8025822726	Paenibacillus sp. ClWae2A	1	156970	158763		8025822729	COG1240===Mg-chelatase subunit ChlD<<>>COG4935===Regulatory P domain of the subtilisin-like proprotein convertases and other proteases	pfam00092===VWA
8025826711	Ga0609718_06_234499_236187	Ca-activated chloride channel family protein	8025822726	Paenibacillus sp. ClWae2A	1	234499	236187		8025822731	COG4245===Uncharacterized conserved protein YegL, contains vWA domain of TerY type	pfam13531===SBP_bac_11<<>>pfam00092===VWA
8025825663	Ga0609718_03_691564_694215	Ca2+-transporting ATPase	8025822726	Paenibacillus sp. ClWae2A	1	691564	694215		8025822728	COG0474===Magnesium-transporting ATPase (P-type)	pfam00689===Cation_ATPase_C<<>>pfam00122===E1-E2_ATPase<<>>pfam00690===Cation_ATPase_N<<>>pfam13246===Cation_ATPase<<>>pfam08282===Hydrolase_3
8025825283	Ga0609718_03_277697_280555	Ca2+-transporting ATPase	8025822726	Paenibacillus sp. ClWae2A	1	277697	280555		8025822728	COG0474===Magnesium-transporting ATPase (P-type)	pfam00122===E1-E2_ATPase<<>>pfam00689===Cation_ATPase_C<<>>pfam00702===Hydrolase<<>>pfam00690===Cation_ATPase_N
8025823654	Ga0609718_01_1089341_1089850	Ca2+/Na+ antiporter	8025822726	Paenibacillus sp. ClWae2A	1	1089341	1089850		8025822726	COG0530===Ca2+/Na+ antiporter
8025825297	Ga0609718_03_294526_295596	Ca2+:H+ antiporter	8025822726	Paenibacillus sp. ClWae2A	1	294526	295596		8025822728	COG0387===Ca2+/H+ antiporter	pfam01699===Na_Ca_ex
8025824520	Ga0609718_02_601174_601806	caffeoyl-CoA O-methyltransferase	8025822726	Paenibacillus sp. ClWae2A	1	601174	601806		8025822727	COG4122===Predicted O-methyltransferase YrrM	pfam01596===Methyltransf_3
8025827018	Ga0609718_07_233640_234392	capsular polysaccharide biosynthesis protein	8025822726	Paenibacillus sp. ClWae2A	1	233640	234392		8025822732	COG3944===Capsular polysaccharide biosynthesis protein	pfam02706===Wzz
8025825385	Ga0609718_03_376553_379771	carbamoyl-phosphate synthase large subunit	8025822726	Paenibacillus sp. ClWae2A	1	376553	379771		8025822728	COG0458===Carbamoylphosphate synthase large subunit	pfam02786===CPSase_L_D2<<>>pfam02142===MGS<<>>pfam02787===CPSase_L_D3
8025825386	Ga0609718_03_379773_380915	carbamoyl-phosphate synthase small subunit	8025822726	Paenibacillus sp. ClWae2A	1	379773	380915		8025822728	COG0505===Carbamoylphosphate synthase small subunit	pfam00988===CPSase_sm_chain<<>>pfam00117===GATase
8025826104	Ga0609718_04_395041_395286	carbon storage regulator	8025822726	Paenibacillus sp. ClWae2A	1	395041	395286		8025822729	COG1551===sRNA-binding carbon storage regulator CsrA	pfam02599===CsrA
8025823506	Ga0609718_01_928980_929498	carbon-monoxide dehydrogenase small subunit	8025822726	Paenibacillus sp. ClWae2A	1	928980	929498		8025822726	COG2080===Aerobic-type carbon monoxide dehydrogenase, small subunit, CoxS/CutS family	pfam01799===Fer2_2
8025823687	Ga0609718_01_1123953_1124528	carbonic anhydrase	8025822726	Paenibacillus sp. ClWae2A	1	1123953	1124528		8025822726	COG0288===Carbonic anhydrase	pfam00484===Pro_CA
8025823885	Ga0609718_01_1359409_1359915	carbonic anhydrase/acetyltransferase-like protein (isoleucine patch superfamily)	8025822726	Paenibacillus sp. ClWae2A	1	1359409	1359915		8025822726	COG0663===Carbonic anhydrase or acetyltransferase, isoleucine patch superfamily	pfam14602===Hexapep_2
8025826142	Ga0609718_04_438567_440039	carboxyl-terminal processing protease	8025822726	Paenibacillus sp. ClWae2A	1	438567	440039		8025822729	COG0793===C-terminal processing protease CtpA/Prc, contains a PDZ domain	pfam00595===PDZ<<>>pfam01471===PG_binding_1<<>>pfam03572===Peptidase_S41
8025823049	Ga0609718_01_385413_386540	carboxynorspermidine decarboxylase	8025822726	Paenibacillus sp. ClWae2A	1	385413	386540		8025822726	COG0019===Diaminopimelate decarboxylase	pfam00278===Orn_DAP_Arg_deC
8025823686	Ga0609718_01_1122089_1123603	carboxypeptidase Taq	8025822726	Paenibacillus sp. ClWae2A	1	1122089	1123603		8025822726	COG2317===Zn-dependent carboxypeptidase, M32 family	pfam02074===Peptidase_M32
8025826991	Ga0609718_07_205863_207302	cardiolipin synthase	8025822726	Paenibacillus sp. ClWae2A	1	205863	207302		8025822732	COG1502===Phosphatidylserine/phosphatidylglycerophosphate/cardiolipin synthase or related enzyme	pfam13091===PLDc_2
8025825958	Ga0609718_04_254914_256389	cardiolipin synthase	8025822726	Paenibacillus sp. ClWae2A	1	254914	256389		8025822729	COG1502===Phosphatidylserine/phosphatidylglycerophosphate/cardiolipin synthase or related enzyme	pfam13091===PLDc_2
8025826124	Ga0609718_04_417387_418835	cardiolipin synthase	8025822726	Paenibacillus sp. ClWae2A	1	417387	418835		8025822729	COG1502===Phosphatidylserine/phosphatidylglycerophosphate/cardiolipin synthase or related enzyme	pfam13091===PLDc_2<<>>pfam13396===PLDc_N
8025828012	Ga0609718_12_149402_149671	catabolite repression HPr-like protein	8025822726	Paenibacillus sp. ClWae2A	1	149402	149671		8025822737	COG1925===Phosphotransferase system, HPr and related phosphotransfer proteins	pfam00381===PTS-HPr
8025822866	Ga0609718_01_188198_190234	catalase	8025822726	Paenibacillus sp. ClWae2A	1	188198	190234		8025822726	COG0753===Catalase	pfam00199===Catalase<<>>pfam06628===Catalase-rel<<>>pfam18011===Catalase_C
8025825196	Ga0609718_03_183488_185080	catalase	8025822726	Paenibacillus sp. ClWae2A	1	183488	185080		8025822728	COG0753===Catalase	pfam06628===Catalase-rel<<>>pfam00199===Catalase
8025825861	Ga0609718_04_123165_124631	catalase	8025822726	Paenibacillus sp. ClWae2A	1	123165	124631		8025822729	COG0753===Catalase	pfam06628===Catalase-rel<<>>pfam00199===Catalase
8025826986	Ga0609718_07_200468_201337	catechol 2,3-dioxygenase	8025822726	Paenibacillus sp. ClWae2A	1	200468	201337		8025822732	COG2514===Catechol-2,3-dioxygenase	pfam00903===Glyoxalase
8025825664	Ga0609718_03_694279_694662	catechol 2,3-dioxygenase-like lactoylglutathione lyase family enzyme	8025822726	Paenibacillus sp. ClWae2A	1	694279	694662		8025822728	COG0346===Catechol 2,3-dioxygenase or other lactoylglutathione lyase family enzyme	pfam00903===Glyoxalase
8025829108	Ga0609718_24_14930_15604	catechol 2,3-dioxygenase-like lactoylglutathione lyase family enzyme	8025822726	Paenibacillus sp. ClWae2A	1	14930	15604		8025822749	COG0346===Catechol 2,3-dioxygenase or other lactoylglutathione lyase family enzyme	pfam00903===Glyoxalase
8025824309	Ga0609718_02_359452_359826	catechol 2,3-dioxygenase-like lactoylglutathione lyase family enzyme	8025822726	Paenibacillus sp. ClWae2A	1	359452	359826		8025822727	COG0346===Catechol 2,3-dioxygenase or other lactoylglutathione lyase family enzyme	pfam00903===Glyoxalase
8025824088	Ga0609718_02_152575_152970	catechol 2,3-dioxygenase-like lactoylglutathione lyase family enzyme	8025822726	Paenibacillus sp. ClWae2A	1	152575	152970		8025822727	COG0346===Catechol 2,3-dioxygenase or other lactoylglutathione lyase family enzyme	pfam00903===Glyoxalase
8025827537	Ga0609718_09_201763_202230	catechol 2,3-dioxygenase-like lactoylglutathione lyase family enzyme	8025822726	Paenibacillus sp. ClWae2A	1	201763	202230		8025822734	COG0346===Catechol 2,3-dioxygenase or other lactoylglutathione lyase family enzyme	pfam00903===Glyoxalase
8025829113	Ga0609718_24_19705_20247	catechol 2,3-dioxygenase-like lactoylglutathione lyase family enzyme	8025822726	Paenibacillus sp. ClWae2A	1	19705	20247		8025822749	COG0346===Catechol 2,3-dioxygenase or other lactoylglutathione lyase family enzyme	pfam13669===Glyoxalase_4
8025824106	Ga0609718_02_162479_162943	catechol 2,3-dioxygenase-like lactoylglutathione lyase family enzyme	8025822726	Paenibacillus sp. ClWae2A	1	162479	162943		8025822727	COG0346===Catechol 2,3-dioxygenase or other lactoylglutathione lyase family enzyme	pfam00903===Glyoxalase
8025827075	Ga0609718_07_297508_298143	catechol-2,3-dioxygenase	8025822726	Paenibacillus sp. ClWae2A	1	297508	298143		8025822732	COG2514===Catechol-2,3-dioxygenase	pfam00903===Glyoxalase
8025824563	Ga0609718_02_641867_643297	cation diffusion facilitator CzcD-associated flavoprotein CzcO	8025822726	Paenibacillus sp. ClWae2A	1	641867	643297		8025822727	COG2072===Predicted flavoprotein CzcO associated with the cation diffusion facilitator CzcD	pfam13738===Pyr_redox_3
8025827119	Ga0609718_08_14332_15291	cation diffusion facilitator family transporter	8025822726	Paenibacillus sp. ClWae2A	1	14332	15291		8025822733	COG0053===Divalent metal cation (Fe/Co/Zn/Cd) transporter	pfam01545===Cation_efflux<<>>pfam16916===ZT_dimer
8025828782	Ga0609718_19_30884_31771	cation diffusion facilitator family transporter	8025822726	Paenibacillus sp. ClWae2A	1	30884	31771		8025822744	COG0053===Divalent metal cation (Fe/Co/Zn/Cd) transporter	pfam16916===ZT_dimer<<>>pfam01545===Cation_efflux
8025823259	Ga0609718_01_642745_643635	cation diffusion facilitator family transporter	8025822726	Paenibacillus sp. ClWae2A	1	642745	643635		8025822726	COG0053===Divalent metal cation (Fe/Co/Zn/Cd) transporter	pfam01545===Cation_efflux<<>>pfam16916===ZT_dimer
8025825841	Ga0609718_04_100540_101541	cation diffusion facilitator family transporter	8025822726	Paenibacillus sp. ClWae2A	1	100540	101541		8025822729	COG0053===Divalent metal cation (Fe/Co/Zn/Cd) transporter	pfam16916===ZT_dimer<<>>pfam01545===Cation_efflux
8025825816	Ga0609718_04_74494_75408	cation transport ATPase	8025822726	Paenibacillus sp. ClWae2A	1	74494	75408		8025822729	COG2217===Cation transport ATPase
8025826618	Ga0609718_06_131672_132115	cation transporter-like permease	8025822726	Paenibacillus sp. ClWae2A	1	131672	132115		8025822731	COG1824===Permease, similar to cation transporters
8025824738	Ga0609718_02_799332_800684	CBS domain containing-hemolysin-like protein	8025822726	Paenibacillus sp. ClWae2A	1	799332	800684		8025822727	COG1253===Hemolysin or related protein, contains CBS domains	pfam01595===DUF21<<>>pfam00571===CBS<<>>pfam03471===CorC_HlyC
8025826661	Ga0609718_06_173799_174071	CBS domain containing-hemolysin-like protein	8025822726	Paenibacillus sp. ClWae2A	1	173799	174071		8025822731	COG1253===Hemolysin or related protein, contains CBS domains
8025827583	Ga0609718_10_25690_26772	CBS domain containing-hemolysin-like protein	8025822726	Paenibacillus sp. ClWae2A	1	25690	26772		8025822735	COG1253===Hemolysin or related protein, contains CBS domains	pfam01595===DUF21<<>>pfam00571===CBS
8025827582	Ga0609718_10_24068_25405	CBS domain containing-hemolysin-like protein	8025822726	Paenibacillus sp. ClWae2A	1	24068	25405		8025822735	COG1253===Hemolysin or related protein, contains CBS domains	pfam03471===CorC_HlyC<<>>pfam00571===CBS<<>>pfam01595===DUF21
8025823535	Ga0609718_01_965379_966695	CBS domain containing-hemolysin-like protein	8025822726	Paenibacillus sp. ClWae2A	1	965379	966695		8025822726	COG1253===Hemolysin or related protein, contains CBS domains	pfam00571===CBS<<>>pfam01595===DUF21<<>>pfam03471===CorC_HlyC
8025826992	Ga0609718_07_207678_209036	CBS domain containing-hemolysin-like protein	8025822726	Paenibacillus sp. ClWae2A	1	207678	209036		8025822732	COG1253===Hemolysin or related protein, contains CBS domains	pfam00571===CBS<<>>pfam01595===DUF21<<>>pfam03471===CorC_HlyC
8025827780	Ga0609718_11_48338_48763	CBS domain-containing protein	8025822726	Paenibacillus sp. ClWae2A	1	48338	48763		8025822736	COG0517===CBS domain	pfam00571===CBS
8025824476	Ga0609718_02_555488_556576	CBS domain-containing protein	8025822726	Paenibacillus sp. ClWae2A	1	555488	556576		8025822727	COG2905===Signal-transduction protein containing cAMP-binding, CBS, and nucleotidyltransferase domains	pfam03445===DUF294<<>>pfam10335===DUF294_C
8025827725	Ga0609718_10_196083_196487	CBS-domain-containing membrane protein	8025822726	Paenibacillus sp. ClWae2A	1	196083	196487		8025822735	COG3448===CBS-domain-containing membrane protein	pfam00571===CBS
8025828485	Ga0609718_15_94313_96328	Cd2+/Zn2+-exporting ATPase	8025822726	Paenibacillus sp. ClWae2A	1	94313	96328		8025822740	COG2217===Cation transport ATPase	pfam00702===Hydrolase<<>>pfam00122===E1-E2_ATPase
8025829195	Ga0609718_26_13754_16102	Cd2+/Zn2+-exporting ATPase	8025822726	Paenibacillus sp. ClWae2A	1	13754	16102		8025822751	COG2217===Cation transport ATPase	pfam00122===E1-E2_ATPase<<>>pfam00403===HMA<<>>pfam00702===Hydrolase
8025824208	Ga0609718_02_256363_256992	CDP-diacylglycerol--glycerol-3-phosphate 3-phosphatidyltransferase	8025822726	Paenibacillus sp. ClWae2A	1	256363	256992		8025822727	COG0558===Phosphatidylglycerophosphate synthase	pfam01066===CDP-OH_P_transf
8025828446	Ga0609718_15_50979_51524	CDP-diacylglycerol--serine O-phosphatidyltransferase	8025822726	Paenibacillus sp. ClWae2A	1	50979	51524		8025822740	COG1183===Phosphatidylserine synthase	pfam01066===CDP-OH_P_transf
8025829022	Ga0609718_22_53306_54037	CDP-diacylglycerol--serine O-phosphatidyltransferase	8025822726	Paenibacillus sp. ClWae2A	1	53306	54037		8025822747	COG1183===Phosphatidylserine synthase	pfam01066===CDP-OH_P_transf
8025823185	Ga0609718_01_548329_548541	CDP-diglyceride synthetase	8025822726	Paenibacillus sp. ClWae2A	1	548329	548541		8025822726	COG0575===CDP-diglyceride synthetase
8025825407	Ga0609718_03_401689_402156	cell division inhibitor SepF	8025822726	Paenibacillus sp. ClWae2A	1	401689	402156		8025822728	COG1799===FtsZ-interacting cell division protein YlmF	pfam04472===SepF
8025825404	Ga0609718_03_399734_400243	cell division initiation protein	8025822726	Paenibacillus sp. ClWae2A	1	399734	400243		8025822728	COG3599===Cell division septum initiation DivIVA, interacts with FtsZ, MinD and other proteins	pfam05103===DivIVA
8025828878	Ga0609718_20_46920_48965	cell division protease FtsH	8025822726	Paenibacillus sp. ClWae2A	1	46920	48965		8025822745	COG0465===ATP-dependent Zn proteases	pfam17862===AAA_lid_3<<>>pfam00004===AAA<<>>pfam01434===Peptidase_M41
8025823857	Ga0609718_01_1333629_1335131	cell division protease FtsH	8025822726	Paenibacillus sp. ClWae2A	1	1333629	1335131		8025822726	COG0465===ATP-dependent Zn proteases	pfam17862===AAA_lid_3<<>>pfam00004===AAA<<>>pfam01434===Peptidase_M41
8025828871	Ga0609718_20_38929_39264	cell division protein DivIC	8025822726	Paenibacillus sp. ClWae2A	1	38929	39264		8025822745	COG2919===Cell division protein FtsB	pfam04977===DivIC
8025825415	Ga0609718_03_408508_409791	cell division protein FtsA	8025822726	Paenibacillus sp. ClWae2A	1	408508	409791		8025822728	COG0849===Cell division ATPase FtsA	pfam14450===FtsA<<>>pfam02491===SHS2_FTSA
8025826424	Ga0609718_05_288770_290749	cell division protein FtsI/penicillin-binding protein 2	8025822726	Paenibacillus sp. ClWae2A	1	288770	290749		8025822730	COG0768===Cell division protein FtsI/penicillin-binding protein 2	pfam03717===PBP_dimer<<>>pfam00905===Transpeptidase
8025827726	Ga0609718_10_196665_198752	cell division protein FtsI/penicillin-binding protein 2	8025822726	Paenibacillus sp. ClWae2A	1	196665	198752		8025822735	COG0768===Cell division protein FtsI/penicillin-binding protein 2	pfam05223===MecA_N<<>>pfam00905===Transpeptidase<<>>pfam03717===PBP_dimer
8025826425	Ga0609718_05_291119_293155	cell division protein FtsI/penicillin-binding protein 2	8025822726	Paenibacillus sp. ClWae2A	1	291119	293155		8025822730	COG0768===Cell division protein FtsI/penicillin-binding protein 2	pfam00905===Transpeptidase<<>>pfam03717===PBP_dimer
8025827160	Ga0609718_08_60725_62536	cell division protein FtsI/penicillin-binding protein 2	8025822726	Paenibacillus sp. ClWae2A	1	60725	62536		8025822733	COG0768===Cell division protein FtsI/penicillin-binding protein 2	pfam00905===Transpeptidase
8025825426	Ga0609718_03_423023_425356	cell division protein FtsI/penicillin-binding protein 2	8025822726	Paenibacillus sp. ClWae2A	1	423023	425356		8025822728	COG0768===Cell division protein FtsI/penicillin-binding protein 2	pfam03717===PBP_dimer<<>>pfam00905===Transpeptidase<<>>pfam03793===PASTA
8025825427	Ga0609718_03_425369_425797	cell division protein FtsL	8025822726	Paenibacillus sp. ClWae2A	1	425369	425797		8025822728	COG4839===Cell division protein FtsL
8025825416	Ga0609718_03_410085_410957	cell division protein FtsQ	8025822726	Paenibacillus sp. ClWae2A	1	410085	410957		8025822728	COG1589===Cell division septal protein FtsQ	pfam08478===POTRA_1
8025825420	Ga0609718_03_414384_415481	cell division protein FtsW	8025822726	Paenibacillus sp. ClWae2A	1	414384	415481		8025822728	COG0772===Bacterial cell division protein FtsW, lipid II flippase	pfam01098===FTSW_RODA_SPOVE
8025825295	Ga0609718_03_292562_293851	cell division protein FtsW	8025822726	Paenibacillus sp. ClWae2A	1	292562	293851		8025822728	COG0772===Bacterial cell division protein FtsW, lipid II flippase	pfam01098===FTSW_RODA_SPOVE
8025825414	Ga0609718_03_407242_408357	cell division protein FtsZ	8025822726	Paenibacillus sp. ClWae2A	1	407242	408357		8025822728	COG0206===Cell division GTPase FtsZ	pfam12327===FtsZ_C<<>>pfam00091===Tubulin
8025826139	Ga0609718_04_435368_436054	cell division transport system ATP-binding protein	8025822726	Paenibacillus sp. ClWae2A	1	435368	436054		8025822729	COG2884===ABC-type ATPase involved in cell division	pfam00005===ABC_tran
8025826140	Ga0609718_04_436044_436961	cell division transport system permease protein	8025822726	Paenibacillus sp. ClWae2A	1	436044	436961		8025822729	COG2177===Cell division protein FtsX	pfam18075===FtsX_ECD<<>>pfam02687===FtsX
8025824622	Ga0609718_02_719923_720270	cell fate (sporulation/competence/biofilm development) regulator YlbF (YheA/YmcA/DUF963 family)	8025822726	Paenibacillus sp. ClWae2A	1	719923	720270		8025822727	COG3679===Cell fate regulator YlbF, YheA/YmcA/DUF963 family (controls sporulation, competence, biofilm development)	pfam06133===Com_YlbF
8025825290	Ga0609718_03_286589_287026	cell fate (sporulation/competence/biofilm development) regulator YlbF (YheA/YmcA/DUF963 family)	8025822726	Paenibacillus sp. ClWae2A	1	286589	287026		8025822728	COG3679===Cell fate regulator YlbF, YheA/YmcA/DUF963 family (controls sporulation, competence, biofilm development)	pfam06133===Com_YlbF
8025824198	Ga0609718_02_245060_245509	cell fate (sporulation/competence/biofilm development) regulator YmcA (YheA/YmcA/DUF963 family)	8025822726	Paenibacillus sp. ClWae2A	1	245060	245509		8025822727	COG4550===Cell fate regulator YmcA, YheA/YmcA/DUF963 family (controls sporulation, competence, biofilm development)	pfam06133===Com_YlbF
8025828839	Ga0609718_20_9455_10255	cell fate regulator YaaT (PSP1 superfamily)	8025822726	Paenibacillus sp. ClWae2A	1	9455	10255		8025822745	COG1774===Cell fate regulator YaaT, PSP1 superfamily (controls sporulation, competence, biofilm development)	pfam04468===PSP1
8025825842	Ga0609718_04_101685_102281	cell wall assembly regulator SMI1	8025822726	Paenibacillus sp. ClWae2A	1	101685	102281		8025822729	COG4282===Cell wall assembly regulator SMI1	pfam09346===SMI1_KNR4
8025823778	Ga0609718_01_1240124_1240729	cell wall assembly regulator SMI1	8025822726	Paenibacillus sp. ClWae2A	1	1240124	1240729		8025822726	COG4282===Cell wall assembly regulator SMI1	pfam09346===SMI1_KNR4
8025824061	Ga0609718_02_128866_129453	cell wall assembly regulator SMI1	8025822726	Paenibacillus sp. ClWae2A	1	128866	129453		8025822727	COG4282===Cell wall assembly regulator SMI1	pfam09346===SMI1_KNR4
8025823620	Ga0609718_01_1054937_1055437	cell wall-associated NlpC family hydrolase	8025822726	Paenibacillus sp. ClWae2A	1	1054937	1055437		8025822726	COG0791===Cell wall-associated hydrolase, NlpC family	pfam00877===NLPC_P60
8025828920	Ga0609718_21_26645_27439	cell wall-associated NlpC family hydrolase	8025822726	Paenibacillus sp. ClWae2A	1	26645	27439		8025822746	COG0791===Cell wall-associated hydrolase, NlpC family	pfam08239===SH3_3<<>>pfam00877===NLPC_P60
8025824451	Ga0609718_02_533427_533891	cell wall-associated NlpC family hydrolase	8025822726	Paenibacillus sp. ClWae2A	1	533427	533891		8025822727	COG0791===Cell wall-associated hydrolase, NlpC family	pfam00877===NLPC_P60
8025827702	Ga0609718_10_166152_168530	cellobionic acid phosphorylase	8025822726	Paenibacillus sp. ClWae2A	1	166152	168530		8025822735	COG3459===Cellobiose phosphorylase	pfam17167===Glyco_hydro_36<<>>pfam06165===Glyco_transf_36
8025825918	Ga0609718_04_204827_208219	cellobiose phosphorylase	8025822726	Paenibacillus sp. ClWae2A	1	204827	208219		8025822729	COG3459===Cellobiose phosphorylase	pfam17167===Glyco_hydro_36
8025825770	Ga0609718_04_22441_23268	cellobiose transport system permease protein	8025822726	Paenibacillus sp. ClWae2A	1	22441	23268		8025822729	COG0395===ABC-type glycerol-3-phosphate transport system, permease component	pfam00528===BPD_transp_1
8025825771	Ga0609718_04_23289_24239	cellobiose transport system permease protein	8025822726	Paenibacillus sp. ClWae2A	1	23289	24239		8025822729	COG1175===ABC-type sugar transport system, permease component	pfam00528===BPD_transp_1
8025822972	Ga0609718_01_302546_303436	cellobiose transport system permease protein	8025822726	Paenibacillus sp. ClWae2A	1	302546	303436		8025822726	COG1175===ABC-type sugar transport system, permease component	pfam00528===BPD_transp_1
8025825772	Ga0609718_04_24284_25558	cellobiose transport system substrate-binding protein	8025822726	Paenibacillus sp. ClWae2A	1	24284	25558		8025822729	COG1653===ABC-type glycerol-3-phosphate transport system, periplasmic component	pfam01547===SBP_bac_1
8025826867	Ga0609718_07_83594_84073	cellobiose-specific phosphotransferase system component IIC	8025822726	Paenibacillus sp. ClWae2A	1	83594	84073		8025822732	COG1455===Phosphotransferase system cellobiose-specific component IIC
8025826603	Ga0609718_06_112080_114524	cellulose 1,4-beta-cellobiosidase	8025822726	Paenibacillus sp. ClWae2A	1	112080	114524		8025822731	COG5297===Cellulase/cellobiase CelA1	pfam00942===CBM_3<<>>pfam00041===fn3<<>>pfam01341===Glyco_hydro_6
8025823635	Ga0609718_01_1068782_1069612	cellulose biosynthesis protein BcsQ	8025822726	Paenibacillus sp. ClWae2A	1	1068782	1069612		8025822726	COG1192===Cellulose biosynthesis protein BcsQ
8025826881	Ga0609718_07_97422_98639	cellulose biosynthesis protein BcsQ	8025822726	Paenibacillus sp. ClWae2A	1	97422	98639		8025822732	COG1192===Cellulose biosynthesis protein BcsQ	pfam01656===CbiA
8025827827	Ga0609718_11_101246_103537	cellulose synthase (UDP-forming)	8025822726	Paenibacillus sp. ClWae2A	1	101246	103537		8025822736	COG1215===Glycosyltransferase, catalytic subunit of cellulose synthase and poly-beta-1,6-N-acetylglucosamine synthase	pfam07238===PilZ<<>>pfam13641===Glyco_tranf_2_3
8025827496	Ga0609718_09_158071_159366	cellulose synthase/poly-beta-1,6-N-acetylglucosamine synthase-like glycosyltransferase	8025822726	Paenibacillus sp. ClWae2A	1	158071	159366		8025822734	COG1215===Glycosyltransferase, catalytic subunit of cellulose synthase and poly-beta-1,6-N-acetylglucosamine synthase	pfam13641===Glyco_tranf_2_3
8025823462	Ga0609718_01_878975_879676	cellulose synthase/poly-beta-1,6-N-acetylglucosamine synthase-like glycosyltransferase	8025822726	Paenibacillus sp. ClWae2A	1	878975	879676		8025822726	COG1215===Glycosyltransferase, catalytic subunit of cellulose synthase and poly-beta-1,6-N-acetylglucosamine synthase	pfam13398===Peptidase_M50B
8025828198	Ga0609718_13_152390_153832	cellulose synthase/poly-beta-1,6-N-acetylglucosamine synthase-like glycosyltransferase	8025822726	Paenibacillus sp. ClWae2A	1	152390	153832		8025822738	COG1215===Glycosyltransferase, catalytic subunit of cellulose synthase and poly-beta-1,6-N-acetylglucosamine synthase	pfam00535===Glycos_transf_2
8025824909	Ga0609718_02_996782_998020	cellulose synthase/poly-beta-1,6-N-acetylglucosamine synthase-like glycosyltransferase	8025822726	Paenibacillus sp. ClWae2A	1	996782	998020		8025822727	COG1215===Glycosyltransferase, catalytic subunit of cellulose synthase and poly-beta-1,6-N-acetylglucosamine synthase	pfam13641===Glyco_tranf_2_3
8025825965	Ga0609718_04_263428_264576	cellulose synthase/poly-beta-1,6-N-acetylglucosamine synthase-like glycosyltransferase	8025822726	Paenibacillus sp. ClWae2A	1	263428	264576		8025822729	COG1215===Glycosyltransferase, catalytic subunit of cellulose synthase and poly-beta-1,6-N-acetylglucosamine synthase	pfam00535===Glycos_transf_2
8025828007	Ga0609718_12_144540_145565	central glycolytic genes regulator	8025822726	Paenibacillus sp. ClWae2A	1	144540	145565		8025822737	COG2390===DNA-binding transcriptional regulator LsrR, DeoR family	pfam04198===Sugar-bind
8025828371	Ga0609718_14_155965_157554	Cft2 family RNA processing exonuclease	8025822726	Paenibacillus sp. ClWae2A	1	155965	157554		8025822739	COG1236===RNA processing exonuclease, beta-lactamase fold, Cft2 family	pfam12706===Lactamase_B_2
8025826967	Ga0609718_07_183711_185345	chaperonin GroEL	8025822726	Paenibacillus sp. ClWae2A	1	183711	185345		8025822732	COG0459===Chaperonin GroEL (HSP60 family)	pfam00118===Cpn60_TCP1
8025826968	Ga0609718_07_185419_185700	chaperonin GroES	8025822726	Paenibacillus sp. ClWae2A	1	185419	185700		8025822732	COG0234===Co-chaperonin GroES (HSP10)	pfam00166===Cpn10
8025822795	Ga0609718_01_81344_83884	chemotaxis family two-component system sensor kinase Cph1	8025822726	Paenibacillus sp. ClWae2A	1	81344	83884		8025822726	COG4251===Bacteriophytochrome (light-regulated signal transduction histidine kinase)<<>>COG2199===GGDEF domain, diguanylate cyclase (c-di-GMP synthetase) or its enzymatically inactive variants	pfam00360===PHY<<>>pfam08446===PAS_2<<>>pfam00990===GGDEF<<>>pfam13426===PAS_9<<>>pfam01590===GAF
8025823122	Ga0609718_01_473633_474268	chemotaxis protein CheC	8025822726	Paenibacillus sp. ClWae2A	1	473633	474268		8025822726	COG1776===Chemotaxis protein CheY-P-specific phosphatase CheC
8025824258	Ga0609718_02_308380_309006	chemotaxis protein CheC	8025822726	Paenibacillus sp. ClWae2A	1	308380	309006		8025822727	COG1776===Chemotaxis protein CheY-P-specific phosphatase CheC	pfam04509===CheC
8025824257	Ga0609718_02_307890_308387	chemotaxis protein CheD	8025822726	Paenibacillus sp. ClWae2A	1	307890	308387		8025822727	COG1871===Chemotaxis receptor (MCP) glutamine deamidase CheD	pfam03975===CheD
8025826333	Ga0609718_05_184484_184942	chemotaxis protein CheX	8025822726	Paenibacillus sp. ClWae2A	1	184484	184942		8025822730	COG1406===Chemotaxis protein CheX, a CheY~P-specific phosphatase	pfam13690===CheX
8025823901	Ga0609718_01_1375964_1376758	chemotaxis protein methyltransferase CheR	8025822726	Paenibacillus sp. ClWae2A	1	1375964	1376758		8025822726	COG1352===Methylase of chemotaxis methyl-accepting proteins	pfam03705===CheR_N<<>>pfam01739===CheR
8025828790	Ga0609718_19_40193_41065	chemotaxis protein methyltransferase CheR	8025822726	Paenibacillus sp. ClWae2A	1	40193	41065		8025822744	COG1352===Methylase of chemotaxis methyl-accepting proteins	pfam01739===CheR<<>>pfam03705===CheR_N
8025826151	Ga0609718_04_449905_450702	chemotaxis protein MotA	8025822726	Paenibacillus sp. ClWae2A	1	449905	450702		8025822729	COG1291===Flagellar motor component MotA	pfam01618===MotA_ExbB
8025829046	Ga0609718_23_14444_15247	chemotaxis protein MotA	8025822726	Paenibacillus sp. ClWae2A	1	14444	15247		8025822748	COG1291===Flagellar motor component MotA	pfam01618===MotA_ExbB
8025829045	Ga0609718_23_13639_14457	chemotaxis protein MotB	8025822726	Paenibacillus sp. ClWae2A	1	13639	14457		8025822748	COG1360===Flagellar motor protein MotB	pfam00691===OmpA<<>>pfam13677===MotB_plug
8025826150	Ga0609718_04_449079_449921	chemotaxis protein MotB	8025822726	Paenibacillus sp. ClWae2A	1	449079	449921		8025822729	COG1360===Flagellar motor protein MotB	pfam00691===OmpA<<>>pfam13677===MotB_plug
8025825242	Ga0609718_03_228965_229768	CheY-like chemotaxis protein	8025822726	Paenibacillus sp. ClWae2A	1	228965	229768		8025822728	COG0784===CheY chemotaxis protein or a CheY-like REC (receiver) domain	pfam00072===Response_reg
8025828789	Ga0609718_19_36381_40106	CheY-like chemotaxis protein/GAF domain-containing protein/CHASE3 domain sensor protein	8025822726	Paenibacillus sp. ClWae2A	1	36381	40106		8025822744	COG5278===Extracellular (periplasmic) sensor domain CHASE3 (specificity unknown)<<>>COG0784===CheY chemotaxis protein or a CheY-like REC (receiver) domain<<>>COG2203===GAF domain	pfam00072===Response_reg<<>>pfam02518===HATPase_c<<>>pfam12729===4HB_MCP_1<<>>pfam13185===GAF_2<<>>pfam00512===HisKA
8025827485	Ga0609718_09_144970_146541	chitinase	8025822726	Paenibacillus sp. ClWae2A	1	144970	146541		8025822734	COG3469===Chitinase	pfam00041===fn3<<>>pfam00704===Glyco_hydro_18
8025827484	Ga0609718_09_142870_144969	chitinase	8025822726	Paenibacillus sp. ClWae2A	1	142870	144969		8025822734	COG3979===Chitodextrinase<<>>COG3325===Chitinase, GH18 family	pfam00041===fn3<<>>pfam00704===Glyco_hydro_18
8025828580	Ga0609718_16_72696_73280	chloramphenicol 3-O phosphotransferase	8025822726	Paenibacillus sp. ClWae2A	1	72696	73280		8025822741	COG3896===Chloramphenicol 3-O-phosphotransferase	pfam07931===CPT
8025824083	Ga0609718_02_149359_149898	chloramphenicol 3-O phosphotransferase	8025822726	Paenibacillus sp. ClWae2A	1	149359	149898		8025822727	COG3896===Chloramphenicol 3-O-phosphotransferase	pfam07931===CPT
8025824065	Ga0609718_02_130916_131446	chloramphenicol 3-O-phosphotransferase	8025822726	Paenibacillus sp. ClWae2A	1	130916	131446		8025822727	COG3896===Chloramphenicol 3-O-phosphotransferase	pfam13238===AAA_18
8025826386	Ga0609718_05_252601_253479	chloramphenicol-sensitive protein RarD	8025822726	Paenibacillus sp. ClWae2A	1	252601	253479		8025822730	COG2962===Uncharacterized membrane protein RarD, contains two EamA domains	pfam00892===EamA
8025826178	Ga0609718_05_7843_8280	chorismate mutase	8025822726	Paenibacillus sp. ClWae2A	1	7843	8280		8025822730	COG4492===ACT domain-containing protein
8025823898	Ga0609718_01_1373137_1373523	chorismate mutase	8025822726	Paenibacillus sp. ClWae2A	1	1373137	1373523		8025822726	COG4401===Chorismate mutase	pfam07736===CM_1
8025823900	Ga0609718_01_1374616_1375785	chorismate synthase	8025822726	Paenibacillus sp. ClWae2A	1	1374616	1375785		8025822726	COG0082===Chorismate synthase	pfam01264===Chorismate_synt
8025827562	Ga0609718_10_257_811	chromate reductase	8025822726	Paenibacillus sp. ClWae2A	1	257	811		8025822735	COG0431===NAD(P)H-dependent FMN reductase	pfam03358===FMN_red
8025828344	Ga0609718_14_120589_121176	chromate transporter	8025822726	Paenibacillus sp. ClWae2A	1	120589	121176		8025822739	COG2059===Chromate transport protein ChrA	pfam02417===Chromate_transp
8025825330	Ga0609718_03_330304_331515	chromate transporter	8025822726	Paenibacillus sp. ClWae2A	1	330304	331515		8025822728	COG2059===Chromate transport protein ChrA	pfam02417===Chromate_transp
8025824844	Ga0609718_02_924550_925083	chromate transporter	8025822726	Paenibacillus sp. ClWae2A	1	924550	925083		8025822727	COG2059===Chromate transport protein ChrA	pfam02417===Chromate_transp
8025824845	Ga0609718_02_925099_925734	chromate transporter	8025822726	Paenibacillus sp. ClWae2A	1	925099	925734		8025822727	COG2059===Chromate transport protein ChrA	pfam02417===Chromate_transp
8025828345	Ga0609718_14_121179_121724	chromate transporter	8025822726	Paenibacillus sp. ClWae2A	1	121179	121724		8025822739	COG2059===Chromate transport protein ChrA	pfam02417===Chromate_transp
8025827745	Ga0609718_11_10962_12308	chromosomal replication initiator protein	8025822726	Paenibacillus sp. ClWae2A	1	10962	12308		8025822736	COG0593===Chromosomal replication initiation ATPase DnaA	pfam11638===DnaA_N<<>>pfam00308===Bac_DnaA<<>>pfam08299===Bac_DnaA_C
8025827757	Ga0609718_11_26061_26822	chromosome partitioning protein	8025822726	Paenibacillus sp. ClWae2A	1	26061	26822		8025822736	COG1192===Cellulose biosynthesis protein BcsQ	pfam13614===AAA_31
8025824881	Ga0609718_02_960602_963310	chromosome segregation ATPase/cell division protein ZapA (FtsZ GTPase activity inhibitor)	8025822726	Paenibacillus sp. ClWae2A	1	960602	963310		8025822727	COG1196===Chromosome segregation ATPase<<>>COG3027===Cell division protein ZapA, inhibits GTPase activity of FtsZ
8025824318	Ga0609718_02_366147_369716	chromosome segregation protein	8025822726	Paenibacillus sp. ClWae2A	1	366147	369716		8025822727	COG1196===Chromosome segregation ATPase	pfam06470===SMC_hinge<<>>pfam02463===SMC_N
8025826633	Ga0609718_06_147528_148790	citrate lyase beta subunit	8025822726	Paenibacillus sp. ClWae2A	1	147528	148790		8025822731	COG2301===Citrate lyase beta subunit	pfam15617===C-C_Bond_Lyase
8025824606	Ga0609718_02_703151_704263	citrate synthase	8025822726	Paenibacillus sp. ClWae2A	1	703151	704263		8025822727	COG0372===Citrate synthase	pfam00285===Citrate_synt
8025824865	Ga0609718_02_947374_947949	cob(I)alamin adenosyltransferase	8025822726	Paenibacillus sp. ClWae2A	1	947374	947949		8025822727	COG2096===Cob(I)alamin adenosyltransferase	pfam01923===Cob_adeno_trans
8025823945	Ga0609718_02_4486_4578	cobalamin biosynthesis Mg chelatase CobN	8025822726	Paenibacillus sp. ClWae2A	1	4486	4578		8025822727	COG1429===Cobalamin biosynthesis protein CobN, Mg-chelatase
8025825882	Ga0609718_04_143860_144948	cobalt-precorrin 5A hydrolase	8025822726	Paenibacillus sp. ClWae2A	1	143860	144948		8025822729	COG2073===Cobalamin biosynthesis protein CbiG	pfam11761===CbiG_mid<<>>pfam01890===CbiG_C<<>>pfam11760===CbiG_N
8025825878	Ga0609718_04_139888_141024	cobalt-precorrin-5B (C1)-methyltransferase	8025822726	Paenibacillus sp. ClWae2A	1	139888	141024		8025822729	COG1903===Cobalamin biosynthesis protein CbiD	pfam01888===CbiD
8025828529	Ga0609718_16_25247_26230	cobalt-zinc-cadmium efflux system protein	8025822726	Paenibacillus sp. ClWae2A	1	25247	26230		8025822741	COG1230===Co/Zn/Cd efflux system component	pfam01545===Cation_efflux<<>>pfam16916===ZT_dimer
8025825883	Ga0609718_04_145089_146600	cobyrinic acid a,c-diamide synthase	8025822726	Paenibacillus sp. ClWae2A	1	145089	146600		8025822729	COG1797===Cobyrinic acid a,c-diamide synthase	pfam07685===GATase_3<<>>pfam01656===CbiA
8025825002	Ga0609718_02_1085856_1086632	Cof subfamily protein (haloacid dehalogenase superfamily)	8025822726	Paenibacillus sp. ClWae2A	1	1085856	1086632		8025822727	COG0561===Hydroxymethylpyrimidine pyrophosphatase and other HAD family phosphatases	pfam08282===Hydrolase_3
8025828172	Ga0609718_13_126572_127393	Cof subfamily protein (haloacid dehalogenase superfamily)	8025822726	Paenibacillus sp. ClWae2A	1	126572	127393		8025822738	COG0561===Hydroxymethylpyrimidine pyrophosphatase and other HAD family phosphatases	pfam08282===Hydrolase_3
8025824112	Ga0609718_02_166838_167617	Cof subfamily protein (haloacid dehalogenase superfamily)	8025822726	Paenibacillus sp. ClWae2A	1	166838	167617		8025822727	COG0561===Hydroxymethylpyrimidine pyrophosphatase and other HAD family phosphatases	pfam08282===Hydrolase_3
8025826844	Ga0609718_07_61344_62147	Cof subfamily protein (haloacid dehalogenase superfamily)	8025822726	Paenibacillus sp. ClWae2A	1	61344	62147		8025822732	COG0561===Hydroxymethylpyrimidine pyrophosphatase and other HAD family phosphatases	pfam08282===Hydrolase_3
8025823714	Ga0609718_01_1169791_1170648	Cof subfamily protein (haloacid dehalogenase superfamily)	8025822726	Paenibacillus sp. ClWae2A	1	1169791	1170648		8025822726	COG0561===Hydroxymethylpyrimidine pyrophosphatase and other HAD family phosphatases	pfam08282===Hydrolase_3
8025824460	Ga0609718_02_540296_541099	Cof subfamily protein (haloacid dehalogenase superfamily)	8025822726	Paenibacillus sp. ClWae2A	1	540296	541099		8025822727	COG0561===Hydroxymethylpyrimidine pyrophosphatase and other HAD family phosphatases	pfam08282===Hydrolase_3
8025826915	Ga0609718_07_121167_122063	Cof subfamily protein (haloacid dehalogenase superfamily)	8025822726	Paenibacillus sp. ClWae2A	1	121167	122063		8025822732	COG0561===Hydroxymethylpyrimidine pyrophosphatase and other HAD family phosphatases	pfam08282===Hydrolase_3
8025824565	Ga0609718_02_643976_650362	collagen type VII alpha	8025822726	Paenibacillus sp. ClWae2A	1	643976	650362		8025822727		pfam01391===Collagen
8025825527	Ga0609718_03_535712_536347	competence protein ComEA	8025822726	Paenibacillus sp. ClWae2A	1	535712	536347		8025822728	COG1555===DNA uptake protein ComE and related DNA-binding proteins	pfam12836===HHH_3
8025825525	Ga0609718_03_532177_535047	competence protein ComEC	8025822726	Paenibacillus sp. ClWae2A	1	532177	535047		8025822728	COG2333===Metal-dependent hydrolase, beta-lactamase superfamily II<<>>COG0658===Predicted membrane metal-binding protein	pfam03772===Competence<<>>pfam00753===Lactamase_B<<>>pfam13567===DUF4131
8025825528	Ga0609718_03_536533_537378	competence protein ComER	8025822726	Paenibacillus sp. ClWae2A	1	536533	537378		8025822728	COG0345===Pyrroline-5-carboxylate reductase	pfam03807===F420_oxidored<<>>pfam14748===P5CR_dimer
8025826029	Ga0609718_04_341806_343695	competence protein ComFA	8025822726	Paenibacillus sp. ClWae2A	1	341806	343695		8025822729	COG4098===Superfamily II DNA/RNA helicase required for DNA uptake (late competence protein)	pfam00271===Helicase_C<<>>pfam00270===DEAD
8025823927	Ga0609718_01_1398064_1398288	competence protein ComGC	8025822726	Paenibacillus sp. ClWae2A	1	1398064	1398288		8025822726	COG4537===Competence protein ComGC
8025826548	Ga0609718_06_45568_46107	CopG family nickel-responsive transcriptional regulator	8025822726	Paenibacillus sp. ClWae2A	1	45568	46107		8025822731	COG0864===Metal-responsive transcriptional regulator, contains CopG/Arc/MetJ DNA-binding domain	pfam08753===NikR_C
8025826927	Ga0609718_07_131829_132110	CopG family transcriptional regulator/antitoxin EndoAI	8025822726	Paenibacillus sp. ClWae2A	1	131829	132110		8025822732	COG0864===Metal-responsive transcriptional regulator, contains CopG/Arc/MetJ DNA-binding domain	pfam01402===RHH_1
8025828262	Ga0609718_14_39589_39789	copper chaperone	8025822726	Paenibacillus sp. ClWae2A	1	39589	39789		8025822739	COG2608===Copper chaperone CopZ	pfam00403===HMA
8025823006	Ga0609718_01_339896_340474	copper chaperone NosL	8025822726	Paenibacillus sp. ClWae2A	1	339896	340474		8025822726	COG4314===Nitrous oxide reductase accessory protein NosL	pfam05573===NosL
8025827953	Ga0609718_12_76091_76855	copper homeostasis protein	8025822726	Paenibacillus sp. ClWae2A	1	76091	76855		8025822737	COG3142===Copper homeostasis protein CutC	pfam03932===CutC
8025828282	Ga0609718_14_55990_57705	copper transport protein	8025822726	Paenibacillus sp. ClWae2A	1	55990	57705		8025822739	COG2372===Copper-binding protein CopC (methionine-rich)<<>>COG1276===Putative copper export protein	pfam13115===YtkA<<>>pfam04234===CopC<<>>pfam05425===CopD
8025826743	Ga0609718_06_272304_273740	coproporphyrinogen III oxidase-like Fe-S oxidoreductase	8025822726	Paenibacillus sp. ClWae2A	1	272304	273740		8025822731	COG0635===Coproporphyrinogen III oxidase or related Fe-S oxidoreductase	pfam04055===Radical_SAM
8025826221	Ga0609718_05_53313_54542	CP family cyanate transporter-like MFS transporter	8025822726	Paenibacillus sp. ClWae2A	1	53313	54542		8025822730	COG2807===Cyanate permease	pfam07690===MFS_1
8025829110	Ga0609718_24_16675_17856	CP family cyanate transporter-like MFS transporter	8025822726	Paenibacillus sp. ClWae2A	1	16675	17856		8025822749	COG2807===Cyanate permease	pfam07690===MFS_1
8025825725	Ga0609718_03_759909_761114	CPA2 family monovalent cation:H+ antiporter-2	8025822726	Paenibacillus sp. ClWae2A	1	759909	761114		8025822728	COG0475===Kef-type K+ transport system, membrane component KefB	pfam00999===Na_H_Exchanger
8025824840	Ga0609718_02_919793_921031	CPA2 family monovalent cation:H+ antiporter-2	8025822726	Paenibacillus sp. ClWae2A	1	919793	921031		8025822727	COG0475===Kef-type K+ transport system, membrane component KefB	pfam00999===Na_H_Exchanger
8025827142	Ga0609718_08_43082_43483	CrcB protein	8025822726	Paenibacillus sp. ClWae2A	1	43082	43483		8025822733	COG0239===Fluoride ion exporter CrcB/FEX, affects chromosome condensation	pfam02537===CRCB
8025827143	Ga0609718_08_43480_43839	CrcB protein	8025822726	Paenibacillus sp. ClWae2A	1	43480	43839		8025822733	COG0239===Fluoride ion exporter CrcB/FEX, affects chromosome condensation	pfam02537===CRCB
8025826512	Ga0609718_06_8667_9584	CRISPR/Cas system-associated exonuclease Cas4 (RecB family)	8025822726	Paenibacillus sp. ClWae2A	1	8667	9584		8025822731	COG1468===CRISPR/Cas system-associated exonuclease Cas4, RecB family	pfam12705===PDDEXK_1
8025827106	Ga0609718_08_1482_1991	crossover junction endodeoxyribonuclease RuvC	8025822726	Paenibacillus sp. ClWae2A	1	1482	1991		8025822733	COG0817===Holliday junction resolvasome RuvABC endonuclease subunit	pfam02075===RuvC
8025824709	Ga0609718_02_785122_785655	crossover junction endodeoxyribonuclease RuvC	8025822726	Paenibacillus sp. ClWae2A	1	785122	785655		8025822727	COG0817===Holliday junction resolvasome RuvABC endonuclease subunit	pfam02075===RuvC
8025825781	Ga0609718_04_34307_35002	CRP-like cAMP-binding protein	8025822726	Paenibacillus sp. ClWae2A	1	34307	35002		8025822729	COG0664===cAMP-binding domain of CRP or a regulatory subunit of cAMP-dependent protein kinases	pfam00027===cNMP_binding<<>>pfam13545===HTH_Crp_2
8025823787	Ga0609718_01_1247460_1248161	CRP-like cAMP-binding protein	8025822726	Paenibacillus sp. ClWae2A	1	1247460	1248161		8025822726	COG0664===cAMP-binding domain of CRP or a regulatory subunit of cAMP-dependent protein kinases	pfam13545===HTH_Crp_2<<>>pfam00027===cNMP_binding
8025825176	Ga0609718_03_163303_164019	CRP-like cAMP-binding protein	8025822726	Paenibacillus sp. ClWae2A	1	163303	164019		8025822728	COG0664===cAMP-binding domain of CRP or a regulatory subunit of cAMP-dependent protein kinases	pfam13545===HTH_Crp_2<<>>pfam00027===cNMP_binding
8025823785	Ga0609718_01_1245727_1246428	CRP-like cAMP-binding protein	8025822726	Paenibacillus sp. ClWae2A	1	1245727	1246428		8025822726	COG0664===cAMP-binding domain of CRP or a regulatory subunit of cAMP-dependent protein kinases	pfam13545===HTH_Crp_2<<>>pfam00027===cNMP_binding
8025828339	Ga0609718_14_116358_117134	CRP-like cAMP-binding protein	8025822726	Paenibacillus sp. ClWae2A	1	116358	117134		8025822739	COG0664===cAMP-binding domain of CRP or a regulatory subunit of cAMP-dependent protein kinases	pfam00027===cNMP_binding<<>>pfam13545===HTH_Crp_2
8025822791	Ga0609718_01_77785_78483	CRP-like cAMP-binding protein	8025822726	Paenibacillus sp. ClWae2A	1	77785	78483		8025822726	COG0664===cAMP-binding domain of CRP or a regulatory subunit of cAMP-dependent protein kinases	pfam00027===cNMP_binding<<>>pfam13545===HTH_Crp_2
8025827444	Ga0609718_09_99361_100053	CRP/FNR family putative post-exponential-phase nitrogen-starvation transcriptional regulator	8025822726	Paenibacillus sp. ClWae2A	1	99361	100053		8025822734	COG0664===cAMP-binding domain of CRP or a regulatory subunit of cAMP-dependent protein kinases	pfam00027===cNMP_binding<<>>pfam13545===HTH_Crp_2
8025829171	Ga0609718_25_24011_24211	CspA family cold shock protein	8025822726	Paenibacillus sp. ClWae2A	1	24011	24211		8025822750	COG1278===Cold shock protein, CspA family	pfam00313===CSD
8025826578	Ga0609718_06_83667_83867	CspA family cold shock protein	8025822726	Paenibacillus sp. ClWae2A	1	83667	83867		8025822731	COG1278===Cold shock protein, CspA family	pfam00313===CSD
8025826119	Ga0609718_04_409851_410048	CspA family cold shock protein	8025822726	Paenibacillus sp. ClWae2A	1	409851	410048		8025822729	COG1278===Cold shock protein, CspA family	pfam00313===CSD
8025824495	Ga0609718_02_574790_574987	CspA family cold shock protein	8025822726	Paenibacillus sp. ClWae2A	1	574790	574987		8025822727	COG1278===Cold shock protein, CspA family	pfam00313===CSD
8025829070	Ga0609718_23_37117_38721	CTP synthase	8025822726	Paenibacillus sp. ClWae2A	1	37117	38721		8025822748	COG0504===CTP synthase (UTP-ammonia lyase)	pfam06418===CTP_synth_N<<>>pfam00117===GATase
8025828261	Ga0609718_14_36886_39426	Cu+-exporting ATPase	8025822726	Paenibacillus sp. ClWae2A	1	36886	39426		8025822739	COG2217===Cation transport ATPase	pfam00403===HMA<<>>pfam00122===E1-E2_ATPase<<>>pfam00702===Hydrolase
8025823008	Ga0609718_01_341317_342030	Cu-processing system ATP-binding protein	8025822726	Paenibacillus sp. ClWae2A	1	341317	342030		8025822726	COG1131===ABC-type multidrug transport system, ATPase component	pfam00005===ABC_tran
8025823007	Ga0609718_01_340542_341324	Cu-processing system permease protein	8025822726	Paenibacillus sp. ClWae2A	1	340542	341324		8025822726	COG1277===ABC-type transport system involved in multi-copper enzyme maturation, permease component	pfam12679===ABC2_membrane_2
8025822946	Ga0609718_01_275069_277159	CubicO group peptidase (beta-lactamase class C family)	8025822726	Paenibacillus sp. ClWae2A	1	275069	277159		8025822726	COG1680===CubicO group peptidase, beta-lactamase class C family	pfam00144===Beta-lactamase
8025823071	Ga0609718_01_407094_409196	CubicO group peptidase (beta-lactamase class C family)	8025822726	Paenibacillus sp. ClWae2A	1	407094	409196		8025822726	COG1680===CubicO group peptidase, beta-lactamase class C family	pfam00144===Beta-lactamase
8025826930	Ga0609718_07_135397_136887	CubicO group peptidase (beta-lactamase class C family)	8025822726	Paenibacillus sp. ClWae2A	1	135397	136887		8025822732	COG1680===CubicO group peptidase, beta-lactamase class C family	pfam00144===Beta-lactamase<<>>pfam11954===DUF3471
8025824821	Ga0609718_02_899036_899953	CubicO group peptidase (beta-lactamase class C family)	8025822726	Paenibacillus sp. ClWae2A	1	899036	899953		8025822727	COG1680===CubicO group peptidase, beta-lactamase class C family	pfam00144===Beta-lactamase
8025823556	Ga0609718_01_983058_984851	CubicO group peptidase (beta-lactamase class C family)	8025822726	Paenibacillus sp. ClWae2A	1	983058	984851		8025822726	COG1680===CubicO group peptidase, beta-lactamase class C family	pfam00144===Beta-lactamase
8025822949	Ga0609718_01_279587_281740	CubicO group peptidase (beta-lactamase class C family)	8025822726	Paenibacillus sp. ClWae2A	1	279587	281740		8025822726	COG1680===CubicO group peptidase, beta-lactamase class C family	pfam00144===Beta-lactamase
8025828566	Ga0609718_16_60633_62438	CubicO group peptidase (beta-lactamase class C family)	8025822726	Paenibacillus sp. ClWae2A	1	60633	62438		8025822741	COG1680===CubicO group peptidase, beta-lactamase class C family	pfam00144===Beta-lactamase
8025828357	Ga0609718_14_139090_140523	CubicO group peptidase (beta-lactamase class C family)	8025822726	Paenibacillus sp. ClWae2A	1	139090	140523		8025822739	COG1680===CubicO group peptidase, beta-lactamase class C family	pfam00144===Beta-lactamase<<>>pfam07833===Cu_amine_oxidN1
8025825612	Ga0609718_03_624351_625535	CubicO group peptidase (beta-lactamase class C family)	8025822726	Paenibacillus sp. ClWae2A	1	624351	625535		8025822728	COG1680===CubicO group peptidase, beta-lactamase class C family	pfam00144===Beta-lactamase
8025824442	Ga0609718_02_523614_525089	CubicO group peptidase (beta-lactamase class C family)	8025822726	Paenibacillus sp. ClWae2A	1	523614	525089		8025822727	COG1680===CubicO group peptidase, beta-lactamase class C family	pfam00144===Beta-lactamase
8025822995	Ga0609718_01_326277_328328	CubicO group peptidase (beta-lactamase class C family)	8025822726	Paenibacillus sp. ClWae2A	1	326277	328328		8025822726	COG1680===CubicO group peptidase, beta-lactamase class C family	pfam00144===Beta-lactamase
8025828432	Ga0609718_15_38186_39241	CubicO group peptidase (beta-lactamase class C family)	8025822726	Paenibacillus sp. ClWae2A	1	38186	39241		8025822740	COG1680===CubicO group peptidase, beta-lactamase class C family	pfam00144===Beta-lactamase
8025823760	Ga0609718_01_1220734_1221756	CubicO group peptidase (beta-lactamase class C family)	8025822726	Paenibacillus sp. ClWae2A	1	1220734	1221756		8025822726	COG1680===CubicO group peptidase, beta-lactamase class C family	pfam00144===Beta-lactamase
8025823055	Ga0609718_01_390130_391263	CubicO group peptidase (beta-lactamase class C family)	8025822726	Paenibacillus sp. ClWae2A	1	390130	391263		8025822726	COG1680===CubicO group peptidase, beta-lactamase class C family	pfam00144===Beta-lactamase
8025824123	Ga0609718_02_174906_175949	CubicO group peptidase (beta-lactamase class C family)	8025822726	Paenibacillus sp. ClWae2A	1	174906	175949		8025822727	COG1680===CubicO group peptidase, beta-lactamase class C family	pfam00144===Beta-lactamase
8025823759	Ga0609718_01_1219655_1220641	CubicO group peptidase (beta-lactamase class C family)	8025822726	Paenibacillus sp. ClWae2A	1	1219655	1220641		8025822726	COG1680===CubicO group peptidase, beta-lactamase class C family	pfam00144===Beta-lactamase
8025827800	Ga0609718_11_70401_70568	CxxH/CxxC protein (TIGR04129 family)	8025822726	Paenibacillus sp. ClWae2A	1	70401	70568		8025822736		pfam14116===YyzF
8025826365	Ga0609718_05_234103_234768	cyanophycinase-like exopeptidase	8025822726	Paenibacillus sp. ClWae2A	1	234103	234768		8025822730	COG4242===Cyanophycinase and related exopeptidases
8025828030	Ga0609718_12_171405_172166	cyclase	8025822726	Paenibacillus sp. ClWae2A	1	171405	172166		8025822737	COG0107===Imidazole glycerol phosphate synthase subunit HisF	pfam00977===His_biosynth
8025823390	Ga0609718_01_806514_807536	cyclase	8025822726	Paenibacillus sp. ClWae2A	1	806514	807536		8025822726	COG0491===Glyoxylase or a related metal-dependent hydrolase, beta-lactamase superfamily II	pfam00753===Lactamase_B
8025824852	Ga0609718_02_934134_935354	cyclic dehypoxanthinyl futalosine synthase	8025822726	Paenibacillus sp. ClWae2A	1	934134	935354		8025822727	COG1060===2-iminoacetate synthase ThiH (tyrosine cleavage enzyme, thamine biosynthesis)	pfam19288===CofH_C<<>>pfam04055===Radical_SAM
8025826972	Ga0609718_07_187941_188444	cyclic pyranopterin phosphate synthase	8025822726	Paenibacillus sp. ClWae2A	1	187941	188444		8025822732	COG0315===Molybdenum cofactor biosynthesis enzyme	pfam01967===MoaC
8025825938	Ga0609718_04_230630_231631	cyclic pyranopterin phosphate synthase	8025822726	Paenibacillus sp. ClWae2A	1	230630	231631		8025822729	COG2896===Molybdenum cofactor biosynthesis enzyme MoaA	pfam04055===Radical_SAM<<>>pfam13394===Fer4_14<<>>pfam06463===Mob_synth_C
8025826697	Ga0609718_06_214700_216472	cyclomaltodextrinase	8025822726	Paenibacillus sp. ClWae2A	1	214700	216472		8025822731	COG0366===Glycosidase	pfam16657===Malt_amylase_C<<>>pfam02903===Alpha-amylase_N<<>>pfam00128===Alpha-amylase
8025823595	Ga0609718_01_1023050_1024801	cyclomaltodextrinase	8025822726	Paenibacillus sp. ClWae2A	1	1023050	1024801		8025822726	COG0366===Glycosidase	pfam02903===Alpha-amylase_N<<>>pfam16657===Malt_amylase_C<<>>pfam00128===Alpha-amylase
8025828215	Ga0609718_13_171009_172763	cyclomaltodextrinase	8025822726	Paenibacillus sp. ClWae2A	1	171009	172763		8025822738	COG0366===Glycosidase	pfam02903===Alpha-amylase_N<<>>pfam16657===Malt_amylase_C<<>>pfam00128===Alpha-amylase
8025824853	Ga0609718_02_935512_936684	cystathionine beta-lyase	8025822726	Paenibacillus sp. ClWae2A	1	935512	936684		8025822727	COG0626===Cystathionine beta-lyase/cystathionine gamma-synthase	pfam01053===Cys_Met_Meta_PP
8025826542	Ga0609718_06_38641_39831	cystathionine beta-lyase	8025822726	Paenibacillus sp. ClWae2A	1	38641	39831		8025822731	COG1168===Bifunctional PLP-dependent enzyme with beta-cystathionase and maltose regulon repressor activities	pfam00155===Aminotran_1_2
8025825358	Ga0609718_03_350766_351986	cystathionine beta-lyase	8025822726	Paenibacillus sp. ClWae2A	1	350766	351986		8025822728	COG1168===Bifunctional PLP-dependent enzyme with beta-cystathionase and maltose regulon repressor activities	pfam00155===Aminotran_1_2
8025823670	Ga0609718_01_1100746_1101999	cystathionine beta-lyase family protein involved in aluminum resistance	8025822726	Paenibacillus sp. ClWae2A	1	1100746	1101999		8025822726	COG4100===Cystathionine beta-lyase family protein involved in aluminum resistance	pfam06838===Met_gamma_lyase
8025825486	Ga0609718_03_485146_486279	cystathionine gamma-lyase/homocysteine desulfhydrase	8025822726	Paenibacillus sp. ClWae2A	1	485146	486279		8025822728	COG0626===Cystathionine beta-lyase/cystathionine gamma-synthase	pfam01053===Cys_Met_Meta_PP
8025824854	Ga0609718_02_936681_937868	cystathionine gamma-synthase	8025822726	Paenibacillus sp. ClWae2A	1	936681	937868		8025822727	COG0626===Cystathionine beta-lyase/cystathionine gamma-synthase	pfam01053===Cys_Met_Meta_PP
8025827147	Ga0609718_08_46637_47788	cysteine desulfurase	8025822726	Paenibacillus sp. ClWae2A	1	46637	47788		8025822733	COG1104===Cysteine sulfinate desulfinase/cysteine desulfurase or related enzyme	pfam00266===Aminotran_5
8025825452	Ga0609718_03_451912_453060	cysteine desulfurase	8025822726	Paenibacillus sp. ClWae2A	1	451912	453060		8025822728	COG1104===Cysteine sulfinate desulfinase/cysteine desulfurase or related enzyme	pfam00266===Aminotran_5
8025827759	Ga0609718_11_27822_28976	cysteine desulfurase family protein	8025822726	Paenibacillus sp. ClWae2A	1	27822	28976		8025822736	COG0520===Selenocysteine lyase/Cysteine desulfurase	pfam00266===Aminotran_5
8025824749	Ga0609718_02_811609_812829	cysteine desulfurase/selenocysteine lyase	8025822726	Paenibacillus sp. ClWae2A	1	811609	812829		8025822727	COG0520===Selenocysteine lyase/Cysteine desulfurase	pfam00266===Aminotran_5
8025828885	Ga0609718_20_55828_56766	cysteine synthase A	8025822726	Paenibacillus sp. ClWae2A	1	55828	56766		8025822745	COG0031===Cysteine synthase	pfam00291===PALP
8025825194	Ga0609718_03_179868_180824	cysteine synthase A	8025822726	Paenibacillus sp. ClWae2A	1	179868	180824		8025822728	COG0031===Cysteine synthase	pfam00291===PALP
8025822861	Ga0609718_01_179653_180234	cysteine/O-acetylserine efflux protein	8025822726	Paenibacillus sp. ClWae2A	1	179653	180234		8025822726	COG1280===Threonine/homoserine/homoserine lactone efflux protein	pfam01810===LysE
8025827236	Ga0609718_08_152920_153501	cysteine/O-acetylserine efflux protein	8025822726	Paenibacillus sp. ClWae2A	1	152920	153501		8025822733	COG1280===Threonine/homoserine/homoserine lactone efflux protein	pfam01810===LysE
8025829015	Ga0609718_22_46142_47542	cysteinyl-tRNA synthetase	8025822726	Paenibacillus sp. ClWae2A	1	46142	47542		8025822747	COG0215===Cysteinyl-tRNA synthetase	pfam01406===tRNA-synt_1e<<>>pfam09190===DALR_2
8025828462	Ga0609718_15_62343_63089	cystine transport system ATP-binding protein	8025822726	Paenibacillus sp. ClWae2A	1	62343	63089		8025822740	COG1126===ABC-type polar amino acid transport system, ATPase component	pfam00005===ABC_tran
8025828461	Ga0609718_15_61682_62326	cystine transport system permease protein	8025822726	Paenibacillus sp. ClWae2A	1	61682	62326		8025822740	COG0765===ABC-type amino acid transport system, permease component	pfam00528===BPD_transp_1
8025828460	Ga0609718_15_60798_61649	cystine transport system substrate-binding protein	8025822726	Paenibacillus sp. ClWae2A	1	60798	61649		8025822740	COG0834===ABC-type amino acid transport/signal transduction system, periplasmic component/domain	pfam00497===SBP_bac_3
8025824524	Ga0609718_02_605498_605926	cytidine deaminase	8025822726	Paenibacillus sp. ClWae2A	1	605498	605926		8025822727	COG0295===Cytidine deaminase
8025825472	Ga0609718_03_472836_473252	cytidine deaminase	8025822726	Paenibacillus sp. ClWae2A	1	472836	473252		8025822728	COG0295===Cytidine deaminase	pfam00383===dCMP_cyt_deam_1
8025823926	Ga0609718_01_1397256_1397960	cytidylate kinase	8025822726	Paenibacillus sp. ClWae2A	1	1397256	1397960		8025822726	COG0283===Cytidylate kinase	pfam02224===Cytidylate_kin
8025828476	Ga0609718_15_84656_86626	cytochrome aa3-600 menaquinol oxidase subunit 1	8025822726	Paenibacillus sp. ClWae2A	1	84656	86626		8025822740	COG0843===Heme/copper-type cytochrome/quinol oxidase, subunit 1	pfam00115===COX1
8025826379	Ga0609718_05_245408_245662	cytochrome b subunit of formate dehydrogenase	8025822726	Paenibacillus sp. ClWae2A	1	245408	245662		8025822730	COG2864===Cytochrome b subunit of formate dehydrogenase
2719360833	Ga0176052_124058	cytochrome c biogenesis protein	2718217922	Paenibacillus xylanexedens PAMC 22703	2	4499595	4501268		2718228226	COG1333===Cytochrome c biogenesis protein ResB	pfam05140===ResB
2931389922	Ga0501920_01_6375002_6376675	cytochrome c biogenesis protein	2931384279	Paenibacillus sp. DR312	2	6375002	6376675		2931384279	COG1333===Cytochrome c biogenesis protein ResB	pfam05140===ResB
8025825027	Ga0609718_03_7069_8742	cytochrome c biogenesis protein	8025822726	Paenibacillus sp. ClWae2A	1	7069	8742		8025822728	COG1333===Cytochrome c biogenesis protein ResB	pfam05140===ResB
2912270609	Ga0479963_01_720133_721806	cytochrome c biogenesis protein	2912269976	Paenibacillus sp. JNUCC-31	2	720133	721806		2912269976	COG1333===Cytochrome c biogenesis protein ResB	pfam05140===ResB
2912286919	Ga0480029_01_3821524_3823197	cytochrome c biogenesis protein	2912283337	Paenibacillus sp. E222	2	3821524	3823197		2912283337	COG1333===Cytochrome c biogenesis protein ResB	pfam05140===ResB
2931388484	Ga0501920_01_4580098_4580814	cytochrome c biogenesis protein CcdA	2931384279	Paenibacillus sp. DR312	2	4580098	4580814		2931384279	COG0785===Cytochrome c biogenesis protein CcdA	pfam02683===DsbD
2912270875	Ga0479963_01_1004410_1004664	cytochrome c biogenesis protein ResB	2912269976	Paenibacillus sp. JNUCC-31	2	1004410	1004664		2912269976	COG1333===Cytochrome c biogenesis protein ResB
2719361996	Ga0176052_125233	cytochrome c oxidase assembly protein subunit 15	2718217922	Paenibacillus xylanexedens PAMC 22703	2	5811994	5812881		2718228226	COG1612===Heme A synthase	pfam02628===COX15-CtaA
2912285625	Ga0480029_01_2469795_2470733	cytochrome c oxidase assembly protein subunit 15	2912283337	Paenibacillus sp. E222	2	2469795	2470733		2912283337	COG1612===Heme A synthase	pfam02628===COX15-CtaA
2912271873	Ga0479963_01_2134403_2135341	cytochrome c oxidase assembly protein subunit 15	2912269976	Paenibacillus sp. JNUCC-31	2	2134403	2135341		2912269976	COG1612===Heme A synthase	pfam02628===COX15-CtaA
8025826414	Ga0609718_05_278067_279005	cytochrome c oxidase assembly protein subunit 15	8025822726	Paenibacillus sp. ClWae2A	1	278067	279005		8025822730	COG1612===Heme A synthase	pfam02628===COX15-CtaA
2931384706	Ga0501920_01_482427_483350	cytochrome c oxidase assembly protein subunit 15	2931384279	Paenibacillus sp. DR312	2	482427	483350		2931384279	COG1612===Heme A synthase	pfam02628===COX15-CtaA
2931386546	Ga0501920_01_2491086_2492939	cytochrome c oxidase subunit 1	2931384279	Paenibacillus sp. DR312	2	2491086	2492939		2931384279	COG0843===Heme/copper-type cytochrome/quinol oxidase, subunit 1	pfam00115===COX1
2912273651	Ga0479963_01_4081532_4083421	cytochrome c oxidase subunit 1	2912269976	Paenibacillus sp. JNUCC-31	2	4081532	4083421		2912269976	COG0843===Heme/copper-type cytochrome/quinol oxidase, subunit 1	pfam00115===COX1
8025828064	Ga0609718_13_10011_11900	cytochrome c oxidase subunit 1	8025822726	Paenibacillus sp. ClWae2A	1	10011	11900		8025822738	COG0843===Heme/copper-type cytochrome/quinol oxidase, subunit 1	pfam00115===COX1
2719357539	Ga0176052_12744	cytochrome c oxidase subunit 1	2718217922	Paenibacillus xylanexedens PAMC 22703	2	750870	752720		2718228226	COG0843===Heme/copper-type cytochrome/quinol oxidase, subunit 1	pfam00115===COX1
2912283827	Ga0480029_01_544242_546131	cytochrome c oxidase subunit 1	2912283337	Paenibacillus sp. E222	2	544242	546131		2912283337	COG0843===Heme/copper-type cytochrome/quinol oxidase, subunit 1	pfam00115===COX1
2931386545	Ga0501920_01_2489965_2491017	cytochrome c oxidase subunit 2	2931384279	Paenibacillus sp. DR312	2	2489965	2491017		2931384279	COG1622===Heme/copper-type cytochrome/quinol oxidase, subunit 2	pfam02790===COX2_TM<<>>pfam00034===Cytochrom_C<<>>pfam00116===COX2
2912283828	Ga0480029_01_546164_547216	cytochrome c oxidase subunit 2	2912283337	Paenibacillus sp. E222	2	546164	547216		2912283337	COG1622===Heme/copper-type cytochrome/quinol oxidase, subunit 2	pfam00116===COX2<<>>pfam00034===Cytochrom_C<<>>pfam02790===COX2_TM
2719357538	Ga0176052_12743	cytochrome c oxidase subunit 2	2718217922	Paenibacillus xylanexedens PAMC 22703	2	749746	750798		2718228226	COG1622===Heme/copper-type cytochrome/quinol oxidase, subunit 2	pfam00034===Cytochrom_C<<>>pfam00116===COX2<<>>pfam02790===COX2_TM
2719358794	Ga0176052_122010	cytochrome c oxidase subunit 2	2718217922	Paenibacillus xylanexedens PAMC 22703	2	2132390	2132782		2718228226
2912275012	Ga0479963_01_5527965_5528351	cytochrome c oxidase subunit 2	2912269976	Paenibacillus sp. JNUCC-31	2	5527965	5528351		2912269976	COG1622===Heme/copper-type cytochrome/quinol oxidase, subunit 2
8025828065	Ga0609718_13_11933_12985	cytochrome c oxidase subunit 2	8025822726	Paenibacillus sp. ClWae2A	1	11933	12985		8025822738	COG1622===Heme/copper-type cytochrome/quinol oxidase, subunit 2	pfam02790===COX2_TM<<>>pfam00116===COX2<<>>pfam00034===Cytochrom_C
2931387762	Ga0501920_01_3804336_3804728	cytochrome c oxidase subunit 2	2931384279	Paenibacillus sp. DR312	2	3804336	3804728		2931384279	COG1622===Heme/copper-type cytochrome/quinol oxidase, subunit 2
8025824880	Ga0609718_02_960111_960497	cytochrome c oxidase subunit 2	8025822726	Paenibacillus sp. ClWae2A	1	960111	960497		8025822727	COG1622===Heme/copper-type cytochrome/quinol oxidase, subunit 2
2912289424	Ga0480029_01_6614646_6615032	cytochrome c oxidase subunit 2	2912283337	Paenibacillus sp. E222	2	6614646	6615032		2912283337	COG1622===Heme/copper-type cytochrome/quinol oxidase, subunit 2
2912273650	Ga0479963_01_4080447_4081499	cytochrome c oxidase subunit 2	2912269976	Paenibacillus sp. JNUCC-31	2	4080447	4081499		2912269976	COG1622===Heme/copper-type cytochrome/quinol oxidase, subunit 2	pfam00034===Cytochrom_C<<>>pfam02790===COX2_TM<<>>pfam00116===COX2
2719357540	Ga0176052_12745	cytochrome c oxidase subunit 3	2718217922	Paenibacillus xylanexedens PAMC 22703	2	752717	753343		2718228226	COG1845===Heme/copper-type cytochrome/quinol oxidase, subunit 3	pfam00510===COX3
2931386547	Ga0501920_01_2492936_2493562	cytochrome c oxidase subunit 3	2931384279	Paenibacillus sp. DR312	2	2492936	2493562		2931384279	COG1845===Heme/copper-type cytochrome/quinol oxidase, subunit 3	pfam00510===COX3
8025828063	Ga0609718_13_9388_10014	cytochrome c oxidase subunit 3	8025822726	Paenibacillus sp. ClWae2A	1	9388	10014		8025822738	COG1845===Heme/copper-type cytochrome/quinol oxidase, subunit 3	pfam00510===COX3
2912283826	Ga0480029_01_543619_544245	cytochrome c oxidase subunit 3	2912283337	Paenibacillus sp. E222	2	543619	544245		2912283337	COG1845===Heme/copper-type cytochrome/quinol oxidase, subunit 3	pfam00510===COX3
2912273652	Ga0479963_01_4083418_4084044	cytochrome c oxidase subunit 3	2912269976	Paenibacillus sp. JNUCC-31	2	4083418	4084044		2912269976	COG1845===Heme/copper-type cytochrome/quinol oxidase, subunit 3	pfam00510===COX3
8025828062	Ga0609718_13_9064_9384	cytochrome c oxidase subunit 4	8025822726	Paenibacillus sp. ClWae2A	1	9064	9384		8025822738	COG3125===Heme/copper-type cytochrome/quinol oxidase, subunit 4	pfam03626===COX4_pro
2931386548	Ga0501920_01_2493566_2493886	cytochrome c oxidase subunit 4	2931384279	Paenibacillus sp. DR312	2	2493566	2493886		2931384279	COG3125===Heme/copper-type cytochrome/quinol oxidase, subunit 4	pfam03626===COX4_pro
2719357541	Ga0176052_12746	cytochrome c oxidase subunit 4	2718217922	Paenibacillus xylanexedens PAMC 22703	2	753347	753667		2718228226	COG3125===Heme/copper-type cytochrome/quinol oxidase, subunit 4	pfam03626===COX4_pro
2912273653	Ga0479963_01_4084048_4084368	cytochrome c oxidase subunit 4	2912269976	Paenibacillus sp. JNUCC-31	2	4084048	4084368		2912269976	COG3125===Heme/copper-type cytochrome/quinol oxidase, subunit 4	pfam03626===COX4_pro
2912283825	Ga0480029_01_543295_543615	cytochrome c oxidase subunit 4	2912283337	Paenibacillus sp. E222	2	543295	543615		2912283337	COG3125===Heme/copper-type cytochrome/quinol oxidase, subunit 4	pfam03626===COX4_pro
2931390054	Ga0501920_01_6501981_6502694	cytochrome c-type biogenesis protein	2931384279	Paenibacillus sp. DR312	2	6501981	6502694		2931384279	COG0785===Cytochrome c biogenesis protein CcdA	pfam02683===DsbD
8025825159	Ga0609718_03_137812_138525	cytochrome c-type biogenesis protein	8025822726	Paenibacillus sp. ClWae2A	1	137812	138525		8025822728	COG0785===Cytochrome c biogenesis protein CcdA	pfam02683===DsbD
2912286823	Ga0480029_01_3736511_3737224	cytochrome c-type biogenesis protein	2912283337	Paenibacillus sp. E222	2	3736511	3737224		2912283337	COG0785===Cytochrome c biogenesis protein CcdA	pfam02683===DsbD
8025824011	Ga0609718_02_78137_78853	cytochrome c-type biogenesis protein	8025822726	Paenibacillus sp. ClWae2A	1	78137	78853		8025822727	COG0785===Cytochrome c biogenesis protein CcdA	pfam02683===DsbD
2719360924	Ga0176052_124150	cytochrome c-type biogenesis protein	2718217922	Paenibacillus xylanexedens PAMC 22703	2	4585210	4585923		2718228226	COG0785===Cytochrome c biogenesis protein CcdA	pfam02683===DsbD
2931390428	Ga0501920_01_6913367_6914080	cytochrome c-type biogenesis protein	2931384279	Paenibacillus sp. DR312	2	6913367	6914080		2931384279	COG0785===Cytochrome c biogenesis protein CcdA	pfam02683===DsbD
2719359501	Ga0176052_122720	cytochrome c-type biogenesis protein	2718217922	Paenibacillus xylanexedens PAMC 22703	2	2878293	2879009		2718228226	COG0785===Cytochrome c biogenesis protein CcdA	pfam02683===DsbD
2912270698	Ga0479963_01_803573_804286	cytochrome c-type biogenesis protein	2912269976	Paenibacillus sp. JNUCC-31	2	803573	804286		2912269976	COG0785===Cytochrome c biogenesis protein CcdA	pfam02683===DsbD
2719360832	Ga0176052_124057	cytochrome c-type biogenesis protein CcsB	2718217922	Paenibacillus xylanexedens PAMC 22703	2	4498336	4499598		2718228226		pfam01578===Cytochrom_C_asm
8025826652	Ga0609718_06_164282_164563	cytochrome c553	8025822726	Paenibacillus sp. ClWae2A	1	164282	164563		8025822731	COG2863===Cytochrome c553
8025825757	Ga0609718_04_5635_7050	cytochrome d ubiquinol oxidase subunit I	8025822726	Paenibacillus sp. ClWae2A	1	5635	7050		8025822729	COG1271===Cytochrome bd-type quinol oxidase, subunit 1	pfam01654===Cyt_bd_oxida_I
8025828776	Ga0609718_19_24748_26094	cytochrome d ubiquinol oxidase subunit I	8025822726	Paenibacillus sp. ClWae2A	1	24748	26094		8025822744	COG1271===Cytochrome bd-type quinol oxidase, subunit 1	pfam01654===Cyt_bd_oxida_I
8025823142	Ga0609718_01_500311_501675	cytochrome d ubiquinol oxidase subunit I	8025822726	Paenibacillus sp. ClWae2A	1	500311	501675		8025822726	COG1271===Cytochrome bd-type quinol oxidase, subunit 1	pfam01654===Cyt_bd_oxida_I
8025828777	Ga0609718_19_26091_27125	cytochrome d ubiquinol oxidase subunit II	8025822726	Paenibacillus sp. ClWae2A	1	26091	27125		8025822744	COG1294===Cytochrome bd-type quinol oxidase, subunit 2	pfam02322===Cyt_bd_oxida_II
8025825758	Ga0609718_04_6995_8050	cytochrome d ubiquinol oxidase subunit II	8025822726	Paenibacillus sp. ClWae2A	1	6995	8050		8025822729	COG1294===Cytochrome bd-type quinol oxidase, subunit 2	pfam02322===Cyt_bd_oxida_II
8025823143	Ga0609718_01_501675_502688	cytochrome d ubiquinol oxidase subunit II	8025822726	Paenibacillus sp. ClWae2A	1	501675	502688		8025822726	COG1294===Cytochrome bd-type quinol oxidase, subunit 2	pfam02322===Cyt_bd_oxida_II
8025828478	Ga0609718_15_87248_87577	cytochrome o ubiquinol oxidase operon protein cyoD	8025822726	Paenibacillus sp. ClWae2A	1	87248	87577		8025822740	COG3125===Heme/copper-type cytochrome/quinol oxidase, subunit 4	pfam03626===COX4_pro
8025828475	Ga0609718_15_83660_84634	cytochrome o ubiquinol oxidase subunit 2	8025822726	Paenibacillus sp. ClWae2A	1	83660	84634		8025822740	COG1622===Heme/copper-type cytochrome/quinol oxidase, subunit 2	pfam06481===COX_ARM
8025828477	Ga0609718_15_86627_87247	cytochrome o ubiquinol oxidase subunit 3	8025822726	Paenibacillus sp. ClWae2A	1	86627	87247		8025822740	COG1845===Heme/copper-type cytochrome/quinol oxidase, subunit 3	pfam00510===COX3
8025822937	Ga0609718_01_264771_266003	cytochrome P450	8025822726	Paenibacillus sp. ClWae2A	1	264771	266003		8025822726	COG2124===Cytochrome P450	pfam00067===p450
8025823307	Ga0609718_01_714157_715386	cytochrome P450	8025822726	Paenibacillus sp. ClWae2A	1	714157	715386		8025822726	COG2124===Cytochrome P450	pfam00067===p450
8025823311	Ga0609718_01_719911_721131	cytochrome P450	8025822726	Paenibacillus sp. ClWae2A	1	719911	721131		8025822726	COG2124===Cytochrome P450	pfam00067===p450
8025823046	Ga0609718_01_381746_383005	cytochrome P450	8025822726	Paenibacillus sp. ClWae2A	1	381746	383005		8025822726	COG2124===Cytochrome P450	pfam00067===p450
8025823440	Ga0609718_01_857180_858379	cytochrome P450	8025822726	Paenibacillus sp. ClWae2A	1	857180	858379		8025822726	COG2124===Cytochrome P450	pfam00067===p450
8025824518	Ga0609718_02_597754_598956	cytochrome P450	8025822726	Paenibacillus sp. ClWae2A	1	597754	598956		8025822727	COG2124===Cytochrome P450	pfam00067===p450
8025822853	Ga0609718_01_167783_171022	cytochrome P450/NADPH-cytochrome P450 reductase	8025822726	Paenibacillus sp. ClWae2A	1	167783	171022		8025822726	COG0369===Sulfite reductase, alpha subunit (flavoprotein)<<>>COG2124===Cytochrome P450	pfam00067===p450<<>>pfam00175===NAD_binding_1<<>>pfam00258===Flavodoxin_1<<>>pfam00667===FAD_binding_1
8025823985	Ga0609718_02_48326_51499	cytochrome P450/NADPH-cytochrome P450 reductase	8025822726	Paenibacillus sp. ClWae2A	1	48326	51499		8025822727	COG0369===Sulfite reductase, alpha subunit (flavoprotein)<<>>COG2124===Cytochrome P450	pfam00175===NAD_binding_1<<>>pfam00258===Flavodoxin_1<<>>pfam00667===FAD_binding_1<<>>pfam00067===p450
8025825229	Ga0609718_03_215511_215831	cytoplasmic iron level regulating protein YaaA (DUF328/UPF0246 family)	8025822726	Paenibacillus sp. ClWae2A	1	215511	215831		8025822728	COG3022===Cytoplasmic iron level regulating protein YaaA, DUF328/UPF0246 family	pfam03883===H2O2_YaaD
8025825225	Ga0609718_03_212871_213623	cytoplasmic iron level regulating protein YaaA (DUF328/UPF0246 family)	8025822726	Paenibacillus sp. ClWae2A	1	212871	213623		8025822728	COG3022===Cytoplasmic iron level regulating protein YaaA, DUF328/UPF0246 family	pfam03883===H2O2_YaaD
8025825228	Ga0609718_03_215111_215425	cytoplasmic iron level regulating protein YaaA (DUF328/UPF0246 family)	8025822726	Paenibacillus sp. ClWae2A	1	215111	215425		8025822728	COG3022===Cytoplasmic iron level regulating protein YaaA, DUF328/UPF0246 family	pfam03883===H2O2_YaaD
8025823958	Ga0609718_02_19871_21172	cytosine deaminase	8025822726	Paenibacillus sp. ClWae2A	1	19871	21172		8025822727	COG0402===Cytosine/adenosine deaminase or related metal-dependent hydrolase	pfam07969===Amidohydro_3
8025823172	Ga0609718_01_536174_537442	cytosine deaminase	8025822726	Paenibacillus sp. ClWae2A	1	536174	537442		8025822726	COG0402===Cytosine/adenosine deaminase or related metal-dependent hydrolase	pfam07969===Amidohydro_3
8025823171	Ga0609718_01_534928_536205	cytosine permease	8025822726	Paenibacillus sp. ClWae2A	1	534928	536205		8025822726	COG1457===Purine-cytosine permease or related protein	pfam02133===Transp_cyt_pur
8025823961	Ga0609718_02_24147_25427	cytosine/adenosine deaminase-related metal-dependent hydrolase	8025822726	Paenibacillus sp. ClWae2A	1	24147	25427		8025822727	COG0402===Cytosine/adenosine deaminase or related metal-dependent hydrolase	pfam07969===Amidohydro_3
8025827246	Ga0609718_08_165253_166482	cytosine/adenosine deaminase-related metal-dependent hydrolase	8025822726	Paenibacillus sp. ClWae2A	1	165253	166482		8025822733	COG0402===Cytosine/adenosine deaminase or related metal-dependent hydrolase	pfam07969===Amidohydro_3
8025823960	Ga0609718_02_22799_24154	cytosine/adenosine deaminase-related metal-dependent hydrolase	8025822726	Paenibacillus sp. ClWae2A	1	22799	24154		8025822727	COG0402===Cytosine/adenosine deaminase or related metal-dependent hydrolase	pfam07969===Amidohydro_3
8025823957	Ga0609718_02_18733_19890	cytosine/adenosine deaminase-related metal-dependent hydrolase	8025822726	Paenibacillus sp. ClWae2A	1	18733	19890		8025822727	COG0402===Cytosine/adenosine deaminase or related metal-dependent hydrolase	pfam07969===Amidohydro_3
8025826136	Ga0609718_04_431182_431931	cytoskeletal protein CcmA (bactofilin family)	8025822726	Paenibacillus sp. ClWae2A	1	431182	431931		8025822729	COG1664===Cytoskeletal protein CcmA, bactofilin family
8025826077	Ga0609718_04_374181_376253	cytoskeletal protein CcmA (bactofilin family)	8025822726	Paenibacillus sp. ClWae2A	1	374181	376253		8025822729	COG1664===Cytoskeletal protein CcmA, bactofilin family
8025826135	Ga0609718_04_430485_431213	cytoskeletal protein CcmA (bactofilin family)	8025822726	Paenibacillus sp. ClWae2A	1	430485	431213		8025822729	COG1664===Cytoskeletal protein CcmA, bactofilin family	pfam04519===Bactofilin
8025824211	Ga0609718_02_258155_259204	cytoskeleton protein RodZ	8025822726	Paenibacillus sp. ClWae2A	1	258155	259204		8025822727	COG1426===Cytoskeletal protein RodZ, contains Xre-like HTH and DUF4115 domains	pfam13464===DUF4115<<>>pfam13413===HTH_25
8025823939	Ga0609718_01_1406479_1408074	D-3-phosphoglycerate dehydrogenase	8025822726	Paenibacillus sp. ClWae2A	1	1406479	1408074		8025822726	COG0111===Phosphoglycerate dehydrogenase or related dehydrogenase<<>>COG3830===ACT domain, binds amino acids and other small ligands	pfam19304===PGDH_inter<<>>pfam00389===2-Hacid_dh<<>>pfam02826===2-Hacid_dh_C<<>>pfam01842===ACT
8025827613	Ga0609718_10_58812_59051	D-alanine--poly(phosphoribitol) ligase subunit 2	8025822726	Paenibacillus sp. ClWae2A	1	58812	59051		8025822735	COG0236===Acyl carrier protein	pfam00550===PP-binding
8025828759	Ga0609718_18_86183_87253	D-alanine-D-alanine ligase	8025822726	Paenibacillus sp. ClWae2A	1	86183	87253		8025822743	COG1181===D-alanine-D-alanine ligase and related ATP-grasp enzymes	pfam07478===Dala_Dala_lig_C
8025828649	Ga0609718_17_43709_44809	D-alanine-D-alanine ligase	8025822726	Paenibacillus sp. ClWae2A	1	43709	44809		8025822742	COG1181===D-alanine-D-alanine ligase and related ATP-grasp enzymes	pfam07478===Dala_Dala_lig_C<<>>pfam01820===Dala_Dala_lig_N
8025827509	Ga0609718_09_171930_172850	D-alanine-D-alanine ligase	8025822726	Paenibacillus sp. ClWae2A	1	171930	172850		8025822734	COG1181===D-alanine-D-alanine ligase and related ATP-grasp enzymes	pfam07478===Dala_Dala_lig_C<<>>pfam01820===Dala_Dala_lig_N
8025826691	Ga0609718_06_207866_208888	D-alanine-D-alanine ligase-like ATP-grasp enzyme	8025822726	Paenibacillus sp. ClWae2A	1	207866	208888		8025822731	COG1181===D-alanine-D-alanine ligase and related ATP-grasp enzymes	pfam02955===GSH-S_ATP
8025822775	Ga0609718_01_54998_55771	D-alanyl-D-alanine carboxypeptidase	8025822726	Paenibacillus sp. ClWae2A	1	54998	55771		8025822726	COG1876===LD-carboxypeptidase LdcB, LAS superfamily	pfam02557===VanY
8025828642	Ga0609718_17_36725_37588	D-alanyl-D-alanine carboxypeptidase	8025822726	Paenibacillus sp. ClWae2A	1	36725	37588		8025822742	COG1876===LD-carboxypeptidase LdcB, LAS superfamily	pfam02557===VanY
8025828090	Ga0609718_13_34599_35573	D-alanyl-D-alanine carboxypeptidase	8025822726	Paenibacillus sp. ClWae2A	1	34599	35573		8025822738	COG1876===LD-carboxypeptidase LdcB, LAS superfamily	pfam02557===VanY
8025827776	Ga0609718_11_41400_42290	D-alanyl-D-alanine carboxypeptidase (penicillin-binding protein 5/6)	8025822726	Paenibacillus sp. ClWae2A	1	41400	42290		8025822736	COG1686===D-alanyl-D-alanine carboxypeptidase	pfam00768===Peptidase_S11
8025825095	Ga0609718_03_76885_78060	D-alanyl-D-alanine carboxypeptidase (penicillin-binding protein 5/6)	8025822726	Paenibacillus sp. ClWae2A	1	76885	78060		8025822728	COG1686===D-alanyl-D-alanine carboxypeptidase	pfam07943===PBP5_C<<>>pfam00768===Peptidase_S11
8025825033	Ga0609718_03_12445_13632	D-alanyl-D-alanine carboxypeptidase (penicillin-binding protein 5/6)	8025822726	Paenibacillus sp. ClWae2A	1	12445	13632		8025822728	COG1686===D-alanyl-D-alanine carboxypeptidase	pfam00768===Peptidase_S11
8025829033	Ga0609718_23_2352_3737	D-alanyl-D-alanine carboxypeptidase (penicillin-binding protein 5/6)	8025822726	Paenibacillus sp. ClWae2A	1	2352	3737		8025822748	COG1686===D-alanyl-D-alanine carboxypeptidase	pfam00768===Peptidase_S11<<>>pfam07943===PBP5_C
8025826935	Ga0609718_07_141714_143927	D-alanyl-D-alanine-carboxypeptidase/D-alanyl-D-alanine-endopeptidase	8025822726	Paenibacillus sp. ClWae2A	1	141714	143927		8025822732	COG1680===CubicO group peptidase, beta-lactamase class C family	pfam00144===Beta-lactamase<<>>pfam00395===SLH
8025822935	Ga0609718_01_263129_264271	D-amino-acid dehydrogenase	8025822726	Paenibacillus sp. ClWae2A	1	263129	264271		8025822726	COG0665===Glycine/D-amino acid oxidase (deaminating)	pfam01266===DAO
8025827473	Ga0609718_09_132043_133362	D-galactonate transporter	8025822726	Paenibacillus sp. ClWae2A	1	132043	133362		8025822734	COG2271===Sugar phosphate permease	pfam07690===MFS_1
8025826762	Ga0609718_06_303060_303869	D-methionine transport system ATP-binding protein	8025822726	Paenibacillus sp. ClWae2A	1	303060	303869		8025822731	COG1135===ABC-type methionine transport system, ATPase component	pfam00005===ABC_tran
8025826411	Ga0609718_05_275715_276755	D-methionine transport system ATP-binding protein	8025822726	Paenibacillus sp. ClWae2A	1	275715	276755		8025822730	COG1135===ABC-type methionine transport system, ATPase component	pfam00005===ABC_tran<<>>pfam09383===NIL
8025826761	Ga0609718_06_302392_303063	D-methionine transport system permease protein	8025822726	Paenibacillus sp. ClWae2A	1	302392	303063		8025822731	COG2011===ABC-type methionine transport system, permease component	pfam00528===BPD_transp_1
8025826410	Ga0609718_05_275055_275714	D-methionine transport system permease protein	8025822726	Paenibacillus sp. ClWae2A	1	275055	275714		8025822730	COG2011===ABC-type methionine transport system, permease component	pfam00528===BPD_transp_1
8025826760	Ga0609718_06_301489_302328	D-methionine transport system substrate-binding protein	8025822726	Paenibacillus sp. ClWae2A	1	301489	302328		8025822731	COG1464===ABC-type metal ion transport system, periplasmic component/surface antigen	pfam03180===Lipoprotein_9
8025826409	Ga0609718_05_274140_274979	D-methionine transport system substrate-binding protein	8025822726	Paenibacillus sp. ClWae2A	1	274140	274979		8025822730	COG1464===ABC-type metal ion transport system, periplasmic component/surface antigen	pfam03180===Lipoprotein_9
8025823062	Ga0609718_01_397186_397587	D-ribose pyranase	8025822726	Paenibacillus sp. ClWae2A	1	397186	397587		8025822726	COG1869===D-ribose pyranose/furanose isomerase RbsD	pfam05025===RbsD_FucU
8025825613	Ga0609718_03_625605_626957	D-serine/D-alanine/glycine transporter	8025822726	Paenibacillus sp. ClWae2A	1	625605	626957		8025822728	COG1113===L-asparagine transporter and related permeases	pfam00324===AA_permease
8025827124	Ga0609718_08_22325_22786	D-tyrosyl-tRNA(Tyr) deacylase	8025822726	Paenibacillus sp. ClWae2A	1	22325	22786		8025822733	COG1490===D-Tyr-tRNAtyr deacylase	pfam02580===Tyr_Deacylase
8025825263	Ga0609718_03_256250_258061	DAK2 domain fusion protein YloV	8025822726	Paenibacillus sp. ClWae2A	1	256250	258061		8025822728	COG1461===Predicted kinase related to dihydroxyacetone kinase	pfam13684===Dak1_2<<>>pfam02734===Dak2
8025825526	Ga0609718_03_535150_535671	dCMP deaminase	8025822726	Paenibacillus sp. ClWae2A	1	535150	535671		8025822728	COG2131===Deoxycytidylate deaminase	pfam00383===dCMP_cyt_deam_1
8025828604	Ga0609718_17_547_939	death-on-curing protein	8025822726	Paenibacillus sp. ClWae2A	1	547	939		8025822742	COG3654===Prophage maintenance system killer protein	pfam02661===Fic
8025825818	Ga0609718_04_76610_77890	deferrochelatase/peroxidase EfeB	8025822726	Paenibacillus sp. ClWae2A	1	76610	77890		8025822729	COG2837===Periplasmic deferrochelatase/peroxidase EfeB	pfam04261===Dyp_perox
8025825262	Ga0609718_03_255171_256034	DegV family protein with EDD domain	8025822726	Paenibacillus sp. ClWae2A	1	255171	256034		8025822728	COG1307===Fatty acid-binding protein DegV (function unknown)	pfam02645===DegV
8025824786	Ga0609718_02_857249_858097	DegV family protein with EDD domain	8025822726	Paenibacillus sp. ClWae2A	1	857249	858097		8025822727	COG1307===Fatty acid-binding protein DegV (function unknown)	pfam02645===DegV
8025828438	Ga0609718_15_42974_43825	DegV family protein with EDD domain	8025822726	Paenibacillus sp. ClWae2A	1	42974	43825		8025822740	COG1307===Fatty acid-binding protein DegV (function unknown)	pfam02645===DegV
8025823906	Ga0609718_01_1380181_1380909	demethylmenaquinone methyltransferase/2-methoxy-6-polyprenyl-1,4-benzoquinol methylase	8025822726	Paenibacillus sp. ClWae2A	1	1380181	1380909		8025822726	COG2226===Ubiquinone/menaquinone biosynthesis C-methylase UbiE	pfam01209===Ubie_methyltran
8025824560	Ga0609718_02_639481_640227	DeoR family fructose operon transcriptional repressor	8025822726	Paenibacillus sp. ClWae2A	1	639481	640227		8025822727	COG1349===DNA-binding transcriptional regulator of sugar metabolism, DeoR/GlpR family	pfam08220===HTH_DeoR<<>>pfam00455===DeoRC
8025828481	Ga0609718_15_89873_90631	DeoR family fructose operon transcriptional repressor	8025822726	Paenibacillus sp. ClWae2A	1	89873	90631		8025822740	COG1349===DNA-binding transcriptional regulator of sugar metabolism, DeoR/GlpR family	pfam00455===DeoRC<<>>pfam08220===HTH_DeoR
8025823990	Ga0609718_02_55808_56569	DeoR family L-fucose operon activator	8025822726	Paenibacillus sp. ClWae2A	1	55808	56569		8025822727	COG1349===DNA-binding transcriptional regulator of sugar metabolism, DeoR/GlpR family	pfam00455===DeoRC<<>>pfam08220===HTH_DeoR
8025824001	Ga0609718_02_66629_67396	DeoR family L-fucose operon activator	8025822726	Paenibacillus sp. ClWae2A	1	66629	67396		8025822727	COG1349===DNA-binding transcriptional regulator of sugar metabolism, DeoR/GlpR family	pfam00455===DeoRC<<>>pfam08220===HTH_DeoR
8025826914	Ga0609718_07_120386_121162	DeoR/GlpR family transcriptional regulator of sugar metabolism	8025822726	Paenibacillus sp. ClWae2A	1	120386	121162		8025822732	COG1349===DNA-binding transcriptional regulator of sugar metabolism, DeoR/GlpR family	pfam00455===DeoRC<<>>pfam08220===HTH_DeoR
8025823416	Ga0609718_01_830492_830731	DeoR/GlpR family transcriptional regulator of sugar metabolism	8025822726	Paenibacillus sp. ClWae2A	1	830492	830731		8025822726	COG1349===DNA-binding transcriptional regulator of sugar metabolism, DeoR/GlpR family	pfam00455===DeoRC
8025826780	Ga0609718_06_321680_322336	deoxyadenosine/deoxycytidine kinase	8025822726	Paenibacillus sp. ClWae2A	1	321680	322336		8025822731	COG1428===Deoxyadenosine/deoxycytidine kinase	pfam01712===dNK
8025826781	Ga0609718_06_322333_322965	deoxyguanosine kinase	8025822726	Paenibacillus sp. ClWae2A	1	322333	322965		8025822731	COG1428===Deoxyadenosine/deoxycytidine kinase	pfam01712===dNK
8025827435	Ga0609718_09_88452_89798	deoxyribodipyrimidine photo-lyase	8025822726	Paenibacillus sp. ClWae2A	1	88452	89798		8025822734	COG0415===Deoxyribodipyrimidine photolyase	pfam03441===FAD_binding_7<<>>pfam00875===DNA_photolyase
8025823643	Ga0609718_01_1075657_1076559	deoxyribonuclease-4	8025822726	Paenibacillus sp. ClWae2A	1	1075657	1076559		8025822726	COG0648===Endonuclease IV	pfam01261===AP_endonuc_2
8025826869	Ga0609718_07_85084_86190	deoxyribonuclease-4	8025822726	Paenibacillus sp. ClWae2A	1	85084	86190		8025822732	COG0648===Endonuclease IV	pfam01261===AP_endonuc_2
8025823477	Ga0609718_01_894040_894984	deoxyribonucleoside regulator	8025822726	Paenibacillus sp. ClWae2A	1	894040	894984		8025822726	COG2390===DNA-binding transcriptional regulator LsrR, DeoR family	pfam12802===MarR_2<<>>pfam04198===Sugar-bind
8025823476	Ga0609718_01_893175_893849	deoxyribose-phosphate aldolase	8025822726	Paenibacillus sp. ClWae2A	1	893175	893849		8025822726	COG0274===Deoxyribose-phosphate aldolase	pfam01791===DeoC
8025828697	Ga0609718_18_7192_7776	dephospho-CoA kinase	8025822726	Paenibacillus sp. ClWae2A	1	7192	7776		8025822743	COG0237===Dephospho-CoA kinase	pfam13671===AAA_33
8025825717	Ga0609718_03_752002_752502	dephospho-CoA kinase	8025822726	Paenibacillus sp. ClWae2A	1	752002	752502		8025822728	COG0237===Dephospho-CoA kinase	pfam13238===AAA_18
8025824591	Ga0609718_02_685406_686002	dephospho-CoA kinase	8025822726	Paenibacillus sp. ClWae2A	1	685406	686002		8025822727	COG0237===Dephospho-CoA kinase	pfam01121===CoaE
8025826377	Ga0609718_05_244012_244155	developmental checkpoint coupling sporulation initiation to replication initiation	8025822726	Paenibacillus sp. ClWae2A	1	244012	244155		8025822730		pfam08970===Sda
8025827315	Ga0609718_08_247233_249530	dextranase	8025822726	Paenibacillus sp. ClWae2A	1	247233	249530		8025822733		pfam02018===CBM_4_9<<>>pfam13199===Glyco_hydro_66
8025827033	Ga0609718_07_254614_256029	dGTPase	8025822726	Paenibacillus sp. ClWae2A	1	254614	256029		8025822732	COG0232===dGTP triphosphohydrolase	pfam01966===HD<<>>pfam13286===HD_assoc
8025823241	Ga0609718_01_613983_615212	DHA1 family bicyclomycin/chloramphenicol resistance-like MFS transporter	8025822726	Paenibacillus sp. ClWae2A	1	613983	615212		8025822726	COG0477===MFS family permease	pfam07690===MFS_1
8025828737	Ga0609718_18_57599_58834	DHA1 family bicyclomycin/chloramphenicol resistance-like MFS transporter	8025822726	Paenibacillus sp. ClWae2A	1	57599	58834		8025822743	COG0477===MFS family permease	pfam07690===MFS_1
8025825618	Ga0609718_03_630288_631535	DHA1 family inner membrane transport protein	8025822726	Paenibacillus sp. ClWae2A	1	630288	631535		8025822728	COG2814===Predicted arabinose efflux permease, MFS family	pfam07690===MFS_1
8025823370	Ga0609718_01_782438_783367	DHA1 family inner membrane transport protein	8025822726	Paenibacillus sp. ClWae2A	1	782438	783367		8025822726	COG2814===Predicted arabinose efflux permease, MFS family	pfam07690===MFS_1
8025827482	Ga0609718_09_140448_141662	DHA1 family inner membrane transport protein	8025822726	Paenibacillus sp. ClWae2A	1	140448	141662		8025822734	COG2814===Predicted arabinose efflux permease, MFS family	pfam07690===MFS_1
8025826932	Ga0609718_07_139224_140519	DHA1 family multidrug resistance protein B-like MFS transporter	8025822726	Paenibacillus sp. ClWae2A	1	139224	140519		8025822732	COG0477===MFS family permease	pfam07690===MFS_1
8025824517	Ga0609718_02_596436_597647	DHA1 family multidrug resistance protein-like MFS transporter	8025822726	Paenibacillus sp. ClWae2A	1	596436	597647		8025822727	COG0477===MFS family permease	pfam07690===MFS_1
8025828934	Ga0609718_21_45259_46473	DHA1 family multidrug resistance protein-like MFS transporter	8025822726	Paenibacillus sp. ClWae2A	1	45259	46473		8025822746	COG0477===MFS family permease	pfam07690===MFS_1
8025823135	Ga0609718_01_493360_494562	DHA1 family multidrug resistance protein-like MFS transporter	8025822726	Paenibacillus sp. ClWae2A	1	493360	494562		8025822726	COG0477===MFS family permease	pfam07690===MFS_1
8025826428	Ga0609718_05_295097_296272	DHA1 family multidrug resistance protein-like MFS transporter	8025822726	Paenibacillus sp. ClWae2A	1	295097	296272		8025822730	COG0477===MFS family permease	pfam07690===MFS_1
8025827279	Ga0609718_08_193230_194426	DHA1 family multidrug resistance protein-like MFS transporter	8025822726	Paenibacillus sp. ClWae2A	1	193230	194426		8025822733	COG0477===MFS family permease	pfam07690===MFS_1
8025825677	Ga0609718_03_707335_708537	DHA1 family multidrug resistance protein-like MFS transporter	8025822726	Paenibacillus sp. ClWae2A	1	707335	708537		8025822728	COG0477===MFS family permease	pfam07690===MFS_1
8025827733	Ga0609718_10_203702_204922	DHA1 family multidrug resistance protein-like MFS transporter	8025822726	Paenibacillus sp. ClWae2A	1	203702	204922		8025822735	COG0477===MFS family permease	pfam07690===MFS_1
8025827323	Ga0609718_08_255682_256983	DHA1 family purine base/nucleoside efflux pump-like MFS transporter	8025822726	Paenibacillus sp. ClWae2A	1	255682	256983		8025822733	COG0738===Fucose permease	pfam07690===MFS_1
8025822868	Ga0609718_01_191201_192364	DHA1 family purine base/nucleoside efflux pump-like MFS transporter	8025822726	Paenibacillus sp. ClWae2A	1	191201	192364		8025822726	COG2814===Predicted arabinose efflux permease, MFS family	pfam07690===MFS_1
8025823443	Ga0609718_01_859445_860629	DHA1 family putative efflux transporter-like MFS transporter	8025822726	Paenibacillus sp. ClWae2A	1	859445	860629		8025822726	COG2814===Predicted arabinose efflux permease, MFS family	pfam07690===MFS_1
8025823271	Ga0609718_01_658162_659331	DHA1 family putative efflux transporter-like MFS transporter	8025822726	Paenibacillus sp. ClWae2A	1	658162	659331		8025822726	COG2814===Predicted arabinose efflux permease, MFS family	pfam07690===MFS_1
8025825834	Ga0609718_04_93040_94380	DHA1 family quinolone resistance protein-like MFS transporter	8025822726	Paenibacillus sp. ClWae2A	1	93040	94380		8025822729	COG0477===MFS family permease	pfam07690===MFS_1
8025822856	Ga0609718_01_173948_175441	DHA2 family lincomycin resistance protein-like MFS transporter	8025822726	Paenibacillus sp. ClWae2A	1	173948	175441		8025822726	COG0477===MFS family permease	pfam07690===MFS_1
8025824851	Ga0609718_02_932281_933666	DHA2 family metal-tetracycline-proton antiporter-like MFS transporter	8025822726	Paenibacillus sp. ClWae2A	1	932281	933666		8025822727	COG2814===Predicted arabinose efflux permease, MFS family	pfam07690===MFS_1
8025823319	Ga0609718_01_730804_732201	DHA2 family metal-tetracycline-proton antiporter-like MFS transporter	8025822726	Paenibacillus sp. ClWae2A	1	730804	732201		8025822726	COG0477===MFS family permease	pfam07690===MFS_1
8025828400	Ga0609718_15_4610_5989	DHA2 family metal-tetracycline-proton antiporter-like MFS transporter	8025822726	Paenibacillus sp. ClWae2A	1	4610	5989		8025822740	COG2814===Predicted arabinose efflux permease, MFS family	pfam07690===MFS_1
8025825665	Ga0609718_03_694920_696260	DHA2 family metal-tetracycline-proton antiporter-like MFS transporter	8025822726	Paenibacillus sp. ClWae2A	1	694920	696260		8025822728	COG2814===Predicted arabinose efflux permease, MFS family	pfam07690===MFS_1
8025826689	Ga0609718_06_204918_206351	DHA2 family multidrug resistance protein-like MFS transporter	8025822726	Paenibacillus sp. ClWae2A	1	204918	206351		8025822731	COG0477===MFS family permease	pfam07690===MFS_1
8025825569	Ga0609718_03_577397_578725	DHA3 family macrolide efflux protein-like MFS transporter	8025822726	Paenibacillus sp. ClWae2A	1	577397	578725		8025822728	COG0477===MFS family permease	pfam07690===MFS_1
8025826702	Ga0609718_06_223816_225102	DHA3 family macrolide efflux protein-like MFS transporter	8025822726	Paenibacillus sp. ClWae2A	1	223816	225102		8025822731	COG0477===MFS family permease	pfam05977===MFS_3
8025826740	Ga0609718_06_269224_270531	DHA3 family macrolide efflux protein-like MFS transporter	8025822726	Paenibacillus sp. ClWae2A	1	269224	270531		8025822731	COG0477===MFS family permease	pfam05977===MFS_3
8025824150	Ga0609718_02_195213_196502	DHA3 family macrolide efflux protein-like MFS transporter	8025822726	Paenibacillus sp. ClWae2A	1	195213	196502		8025822727	COG0477===MFS family permease	pfam07690===MFS_1
8025827611	Ga0609718_10_54048_54929	diacylglycerol kinase (ATP)	8025822726	Paenibacillus sp. ClWae2A	1	54048	54929		8025822735	COG1597===Diacylglycerol kinase family enzyme	pfam00781===DAGK_cat<<>>pfam19279===YegS_C
8025825807	Ga0609718_04_63742_64638	diacylglycerol kinase (ATP)	8025822726	Paenibacillus sp. ClWae2A	1	63742	64638		8025822729	COG1597===Diacylglycerol kinase family enzyme	pfam00781===DAGK_cat<<>>pfam19279===YegS_C
8025827552	Ga0609718_09_213909_214805	diacylglycerol kinase (ATP)	8025822726	Paenibacillus sp. ClWae2A	1	213909	214805		8025822734	COG1597===Diacylglycerol kinase family enzyme	pfam19279===YegS_C<<>>pfam00781===DAGK_cat
8025829101	Ga0609718_24_6951_7787	diadenylate cyclase	8025822726	Paenibacillus sp. ClWae2A	1	6951	7787		8025822749	COG1624===Diadenylate cyclase (c-di-AMP synthetase), DisA_N domain	pfam19293===CdaA_N<<>>pfam02457===DAC
8025829023	Ga0609718_22_54083_55159	diadenylate cyclase	8025822726	Paenibacillus sp. ClWae2A	1	54083	55159		8025822747	COG1623===Diadenylate cyclase (c-di-AMP synthetase), DNA integrity scanning protein DisA	pfam02457===DAC<<>>pfam10635===DisA-linker
8025828332	Ga0609718_14_112452_113081	diadenylate cyclase	8025822726	Paenibacillus sp. ClWae2A	1	112452	113081		8025822739	COG1624===Diadenylate cyclase (c-di-AMP synthetase), DisA_N domain	pfam02457===DAC<<>>pfam10372===YojJ
8025824055	Ga0609718_02_125054_125512	diamine N-acetyltransferase	8025822726	Paenibacillus sp. ClWae2A	1	125054	125512		8025822727	COG1670===Protein N-acetyltransferase, RimJ/RimL family	pfam00583===Acetyltransf_1
8025828547	Ga0609718_16_40210_40677	diamine N-acetyltransferase	8025822726	Paenibacillus sp. ClWae2A	1	40210	40677		8025822741	COG1670===Protein N-acetyltransferase, RimJ/RimL family	pfam13302===Acetyltransf_3
8025824077	Ga0609718_02_144394_144840	diamine N-acetyltransferase	8025822726	Paenibacillus sp. ClWae2A	1	144394	144840		8025822727	COG1670===Protein N-acetyltransferase, RimJ/RimL family	pfam00583===Acetyltransf_1
8025827248	Ga0609718_08_167048_167503	diamine N-acetyltransferase	8025822726	Paenibacillus sp. ClWae2A	1	167048	167503		8025822733	COG1670===Protein N-acetyltransferase, RimJ/RimL family	pfam00583===Acetyltransf_1
8025827719	Ga0609718_10_190787_192064	diaminobutyrate-2-oxoglutarate transaminase	8025822726	Paenibacillus sp. ClWae2A	1	190787	192064		8025822735	COG0160===4-aminobutyrate aminotransferase or related aminotransferase	pfam00202===Aminotran_3
8025826690	Ga0609718_06_206345_207700	diaminobutyrate-2-oxoglutarate transaminase	8025822726	Paenibacillus sp. ClWae2A	1	206345	207700		8025822731	COG0160===4-aminobutyrate aminotransferase or related aminotransferase	pfam00202===Aminotran_3
8025828182	Ga0609718_13_137421_138683	diaminobutyrate-2-oxoglutarate transaminase	8025822726	Paenibacillus sp. ClWae2A	1	137421	138683		8025822738	COG0160===4-aminobutyrate aminotransferase or related aminotransferase	pfam00202===Aminotran_3
8025825081	Ga0609718_03_64546_65649	diaminohydroxyphosphoribosylaminopyrimidine deaminase/5-amino-6-(5-phosphoribosylamino)uracil reductase	8025822726	Paenibacillus sp. ClWae2A	1	64546	65649		8025822728	COG0117===Pyrimidine deaminase domain of riboflavin biosynthesis protein RibD<<>>COG1985===Pyrimidine reductase, riboflavin biosynthesis	pfam00383===dCMP_cyt_deam_1<<>>pfam01872===RibD_C
8025828138	Ga0609718_13_89163_90449	diaminopimelate decarboxylase	8025822726	Paenibacillus sp. ClWae2A	1	89163	90449		8025822738	COG0019===Diaminopimelate decarboxylase	pfam00278===Orn_DAP_Arg_deC<<>>pfam02784===Orn_Arg_deC_N
8025826685	Ga0609718_06_199062_200429	diaminopimelate decarboxylase	8025822726	Paenibacillus sp. ClWae2A	1	199062	200429		8025822731	COG0019===Diaminopimelate decarboxylase	pfam02784===Orn_Arg_deC_N<<>>pfam00278===Orn_DAP_Arg_deC
8025825086	Ga0609718_03_68412_69743	diaminopimelate decarboxylase	8025822726	Paenibacillus sp. ClWae2A	1	68412	69743		8025822728	COG0019===Diaminopimelate decarboxylase	pfam02784===Orn_Arg_deC_N<<>>pfam00278===Orn_DAP_Arg_deC
8025825730	Ga0609718_03_765035_766012	diaminopimelate dehydrogenase	8025822726	Paenibacillus sp. ClWae2A	1	765035	766012		8025822728	COG0057===Glyceraldehyde-3-phosphate dehydrogenase/erythrose-4-phosphate dehydrogenase	pfam01113===DapB_N<<>>pfam16654===DAPDH_C
8025825282	Ga0609718_03_276681_277514	diaminopimelate epimerase	8025822726	Paenibacillus sp. ClWae2A	1	276681	277514		8025822728	COG0253===Diaminopimelate epimerase	pfam01678===DAP_epimerase
8025828730	Ga0609718_18_49686_50705	dienelactone hydrolase	8025822726	Paenibacillus sp. ClWae2A	1	49686	50705		8025822743	COG0412===Dienelactone hydrolase	pfam12715===Abhydrolase_7
8025822945	Ga0609718_01_273591_275045	dienelactone hydrolase	8025822726	Paenibacillus sp. ClWae2A	1	273591	275045		8025822726	COG0412===Dienelactone hydrolase	pfam03403===PAF-AH_p_II
8025823230	Ga0609718_01_602881_603897	dienelactone hydrolase	8025822726	Paenibacillus sp. ClWae2A	1	602881	603897		8025822726	COG0412===Dienelactone hydrolase	pfam12146===Hydrolase_4
8025826993	Ga0609718_07_209131_210714	dienelactone hydrolase	8025822726	Paenibacillus sp. ClWae2A	1	209131	210714		8025822732	COG0412===Dienelactone hydrolase	pfam00326===Peptidase_S9<<>>pfam07833===Cu_amine_oxidN1
8025826729	Ga0609718_06_255727_257874	dienelactone hydrolase/uncharacterized protein with PQ loop repeat	8025822726	Paenibacillus sp. ClWae2A	1	255727	257874		8025822731	COG0412===Dienelactone hydrolase<<>>COG4095===Uncharacterized conserved protein, contains PQ loop repeat
8025825858	Ga0609718_04_120314_121426	diguanylate cyclase	8025822726	Paenibacillus sp. ClWae2A	1	120314	121426		8025822729	COG2199===GGDEF domain, diguanylate cyclase (c-di-GMP synthetase) or its enzymatically inactive variants	pfam07694===5TM-5TMR_LYT<<>>pfam00990===GGDEF
8025828278	Ga0609718_14_51853_53685	diguanylate cyclase (GGDEF)-like protein	8025822726	Paenibacillus sp. ClWae2A	1	51853	53685		8025822739	COG2199===GGDEF domain, diguanylate cyclase (c-di-GMP synthetase) or its enzymatically inactive variants	pfam00990===GGDEF<<>>pfam13487===HD_5
8025825302	Ga0609718_03_298873_300864	diguanylate cyclase (GGDEF)-like protein	8025822726	Paenibacillus sp. ClWae2A	1	298873	300864		8025822728	COG2199===GGDEF domain, diguanylate cyclase (c-di-GMP synthetase) or its enzymatically inactive variants	pfam13185===GAF_2<<>>pfam00990===GGDEF
8025824886	Ga0609718_02_970268_972394	diguanylate cyclase (GGDEF)-like protein	8025822726	Paenibacillus sp. ClWae2A	1	970268	972394		8025822727	COG5001===Predicted signal transduction protein containing a membrane domain, an EAL and a GGDEF domain	pfam00563===EAL<<>>pfam00990===GGDEF<<>>pfam17159===MASE3
8025824545	Ga0609718_02_620586_622202	diguanylate cyclase (GGDEF)-like protein	8025822726	Paenibacillus sp. ClWae2A	1	620586	622202		8025822727	COG2199===GGDEF domain, diguanylate cyclase (c-di-GMP synthetase) or its enzymatically inactive variants	pfam02743===dCache_1<<>>pfam00990===GGDEF
8025824602	Ga0609718_02_698369_699928	diguanylate cyclase (GGDEF)-like protein	8025822726	Paenibacillus sp. ClWae2A	1	698369	699928		8025822727	COG2199===GGDEF domain, diguanylate cyclase (c-di-GMP synthetase) or its enzymatically inactive variants<<>>COG2202===PAS domain	pfam08448===PAS_4<<>>pfam00990===GGDEF<<>>pfam16927===HisKA_7TM
8025825121	Ga0609718_03_102638_103594	diguanylate cyclase (GGDEF)-like protein	8025822726	Paenibacillus sp. ClWae2A	1	102638	103594		8025822728	COG2199===GGDEF domain, diguanylate cyclase (c-di-GMP synthetase) or its enzymatically inactive variants	pfam00990===GGDEF
8025828720	Ga0609718_18_38634_39773	diguanylate cyclase (GGDEF)-like protein	8025822726	Paenibacillus sp. ClWae2A	1	38634	39773		8025822743	COG2199===GGDEF domain, diguanylate cyclase (c-di-GMP synthetase) or its enzymatically inactive variants	pfam00990===GGDEF
8025828722	Ga0609718_18_40478_42118	diguanylate cyclase (GGDEF)-like protein	8025822726	Paenibacillus sp. ClWae2A	1	40478	42118		8025822743	COG2199===GGDEF domain, diguanylate cyclase (c-di-GMP synthetase) or its enzymatically inactive variants	pfam00672===HAMP<<>>pfam00990===GGDEF
8025823123	Ga0609718_01_474261_475223	diguanylate cyclase (GGDEF)-like protein/PAS domain S-box-containing protein	8025822726	Paenibacillus sp. ClWae2A	1	474261	475223		8025822726	COG2199===GGDEF domain, diguanylate cyclase (c-di-GMP synthetase) or its enzymatically inactive variants	pfam00989===PAS<<>>pfam00990===GGDEF
8025825668	Ga0609718_03_698772_699755	diguanylate cyclase (GGDEF)-like protein/PAS domain S-box-containing protein	8025822726	Paenibacillus sp. ClWae2A	1	698772	699755		8025822728	COG2199===GGDEF domain, diguanylate cyclase (c-di-GMP synthetase) or its enzymatically inactive variants	pfam00990===GGDEF<<>>pfam00989===PAS
8025824803	Ga0609718_02_874408_876882	diguanylate cyclase (GGDEF)-like protein/PAS domain S-box-containing protein	8025822726	Paenibacillus sp. ClWae2A	1	874408	876882		8025822727	COG5001===Predicted signal transduction protein containing a membrane domain, an EAL and a GGDEF domain<<>>COG3300===MHYT domain, NO-binding membrane sensor	pfam03707===MHYT<<>>pfam00563===EAL<<>>pfam00990===GGDEF<<>>pfam00989===PAS
8025826557	Ga0609718_06_56732_57733	dihydrodiol dehydrogenase / D-xylose 1-dehydrogenase (NADP)	8025822726	Paenibacillus sp. ClWae2A	1	56732	57733		8025822731	COG0673===Predicted dehydrogenase	pfam01408===GFO_IDH_MocA<<>>pfam02894===GFO_IDH_MocA_C
8025827879	Ga0609718_11_164283_164849	dihydrofolate reductase	8025822726	Paenibacillus sp. ClWae2A	1	164283	164849		8025822736	COG0262===Dihydrofolate reductase	pfam01872===RibD_C
8025823610	Ga0609718_01_1044619_1045107	dihydrofolate reductase	8025822726	Paenibacillus sp. ClWae2A	1	1044619	1045107		8025822726	COG0262===Dihydrofolate reductase	pfam00186===DHFR_1
8025826198	Ga0609718_05_23965_25392	dihydrofolate synthase/folylpolyglutamate synthase	8025822726	Paenibacillus sp. ClWae2A	1	23965	25392		8025822730	COG0285===Folylpolyglutamate synthase/Dihydropteroate synthase	pfam08245===Mur_ligase_M<<>>pfam02875===Mur_ligase_C
8025827652	Ga0609718_10_104064_105449	dihydrolipoamide dehydrogenase	8025822726	Paenibacillus sp. ClWae2A	1	104064	105449		8025822735	COG1249===Pyruvate/2-oxoglutarate dehydrogenase complex, dihydrolipoamide dehydrogenase (E3) component or related enzyme	pfam07992===Pyr_redox_2<<>>pfam02852===Pyr_redox_dim
8025825110	Ga0609718_03_90625_92049	dihydrolipoamide dehydrogenase	8025822726	Paenibacillus sp. ClWae2A	1	90625	92049		8025822728	COG1249===Pyruvate/2-oxoglutarate dehydrogenase complex, dihydrolipoamide dehydrogenase (E3) component or related enzyme	pfam07992===Pyr_redox_2<<>>pfam02852===Pyr_redox_dim
8025823612	Ga0609718_01_1046419_1047834	dihydrolipoamide dehydrogenase	8025822726	Paenibacillus sp. ClWae2A	1	1046419	1047834		8025822726	COG1249===Pyruvate/2-oxoglutarate dehydrogenase complex, dihydrolipoamide dehydrogenase (E3) component or related enzyme	pfam02852===Pyr_redox_dim<<>>pfam07992===Pyr_redox_2
8025828890	Ga0609718_20_61010_61372	dihydroneopterin aldolase	8025822726	Paenibacillus sp. ClWae2A	1	61010	61372		8025822745	COG1539===Dihydroneopterin aldolase	pfam02152===FolB
8025825387	Ga0609718_03_381322_382626	dihydroorotase	8025822726	Paenibacillus sp. ClWae2A	1	381322	382626		8025822728	COG0044===Dihydroorotase or related cyclic amidohydrolase	pfam01979===Amidohydro_1
8025824466	Ga0609718_02_546371_547468	dihydroorotate dehydrogenase	8025822726	Paenibacillus sp. ClWae2A	1	546371	547468		8025822727	COG0167===Dihydroorotate dehydrogenase	pfam01180===DHO_dh
8025828889	Ga0609718_20_60029_60892	dihydropteroate synthase	8025822726	Paenibacillus sp. ClWae2A	1	60029	60892		8025822745	COG0294===Dihydropteroate synthase	pfam00809===Pterin_bind
8025825949	Ga0609718_04_245027_246472	dihydropyrimidinase	8025822726	Paenibacillus sp. ClWae2A	1	245027	246472		8025822729	COG0044===Dihydroorotase or related cyclic amidohydrolase	pfam01979===Amidohydro_1
8025825948	Ga0609718_04_243735_245030	dihydropyrimidine dehydrogenase (NAD+) subunit PreA	8025822726	Paenibacillus sp. ClWae2A	1	243735	245030		8025822729	COG0167===Dihydroorotate dehydrogenase<<>>COG1146===NAD-dependent dihydropyrimidine dehydrogenase, PreA subunit	pfam01180===DHO_dh<<>>pfam14697===Fer4_21
8025825947	Ga0609718_04_242031_243401	dihydropyrimidine dehydrogenase (NAD+) subunit PreT	8025822726	Paenibacillus sp. ClWae2A	1	242031	243401		8025822729	COG0493===NADPH-dependent glutamate synthase beta chain or related oxidoreductase	pfam14691===Fer4_20<<>>pfam07992===Pyr_redox_2
8025827163	Ga0609718_08_65407_67092	dihydroxy-acid dehydratase	8025822726	Paenibacillus sp. ClWae2A	1	65407	67092		8025822733	COG0129===Dihydroxyacid dehydratase/phosphogluconate dehydratase	pfam00920===ILVD_EDD
8025826730	Ga0609718_06_258136_259905	dihydroxyacetone kinase	8025822726	Paenibacillus sp. ClWae2A	1	258136	259905		8025822731	COG2376===Dihydroxyacetone kinase	pfam02733===Dak1<<>>pfam02734===Dak2
8025827290	Ga0609718_08_211460_212329	diketogulonate reductase-like aldo/keto reductase	8025822726	Paenibacillus sp. ClWae2A	1	211460	212329		8025822733	COG0656===Aldo/keto reductase, related to diketogulonate reductase	pfam00248===Aldo_ket_red
8025828297	Ga0609718_14_74320_75147	diketogulonate reductase-like aldo/keto reductase	8025822726	Paenibacillus sp. ClWae2A	1	74320	75147		8025822739	COG0656===Aldo/keto reductase, related to diketogulonate reductase	pfam00248===Aldo_ket_red
8025827972	Ga0609718_12_99013_99867	diketogulonate reductase-like aldo/keto reductase	8025822726	Paenibacillus sp. ClWae2A	1	99013	99867		8025822737	COG0656===Aldo/keto reductase, related to diketogulonate reductase	pfam00248===Aldo_ket_red
8025827483	Ga0609718_09_141858_142715	diketogulonate reductase-like aldo/keto reductase	8025822726	Paenibacillus sp. ClWae2A	1	141858	142715		8025822734	COG0656===Aldo/keto reductase, related to diketogulonate reductase	pfam00248===Aldo_ket_red
8025826538	Ga0609718_06_33532_34398	diketogulonate reductase-like aldo/keto reductase	8025822726	Paenibacillus sp. ClWae2A	1	33532	34398		8025822731	COG0656===Aldo/keto reductase, related to diketogulonate reductase	pfam00248===Aldo_ket_red
8025824526	Ga0609718_02_607028_607858	diketogulonate reductase-like aldo/keto reductase	8025822726	Paenibacillus sp. ClWae2A	1	607028	607858		8025822727	COG0656===Aldo/keto reductase, related to diketogulonate reductase	pfam00248===Aldo_ket_red
8025825462	Ga0609718_03_461720_462835	dinuclear metal center YbgI/SA1388 family protein	8025822726	Paenibacillus sp. ClWae2A	1	461720	462835		8025822728	COG0327===Putative GTP cyclohydrolase 1 type 2, NIF3 family	pfam01784===NIF3
8025824113	Ga0609718_02_167863_168480	dipeptidase E	8025822726	Paenibacillus sp. ClWae2A	1	167863	168480		8025822727	COG3340===Peptidase E	pfam03575===Peptidase_S51
8025824109	Ga0609718_02_164807_165433	dipeptidase E	8025822726	Paenibacillus sp. ClWae2A	1	164807	165433		8025822727	COG3340===Peptidase E	pfam03575===Peptidase_S51
8025825017	Ga0609718_02_1097453_1098118	dipeptidase E	8025822726	Paenibacillus sp. ClWae2A	1	1097453	1098118		8025822727	COG3340===Peptidase E	pfam03575===Peptidase_S51
8025822901	Ga0609718_01_233892_235916	dipeptidyl aminopeptidase/acylaminoacyl peptidase	8025822726	Paenibacillus sp. ClWae2A	1	233892	235916		8025822726	COG1506===Dipeptidyl aminopeptidase/acylaminoacyl peptidase	pfam07676===PD40<<>>pfam00326===Peptidase_S9
8025827777	Ga0609718_11_42412_44841	dipeptidyl aminopeptidase/acylaminoacyl peptidase	8025822726	Paenibacillus sp. ClWae2A	1	42412	44841		8025822736	COG1506===Dipeptidyl aminopeptidase/acylaminoacyl peptidase	pfam00326===Peptidase_S9<<>>pfam00395===SLH
8025828125	Ga0609718_13_75273_77084	dipeptidyl aminopeptidase/acylaminoacyl peptidase	8025822726	Paenibacillus sp. ClWae2A	1	75273	77084		8025822738	COG1506===Dipeptidyl aminopeptidase/acylaminoacyl peptidase	pfam00326===Peptidase_S9
8025826540	Ga0609718_06_35397_37412	dipeptidyl aminopeptidase/acylaminoacyl peptidase	8025822726	Paenibacillus sp. ClWae2A	1	35397	37412		8025822731	COG1506===Dipeptidyl aminopeptidase/acylaminoacyl peptidase	pfam00326===Peptidase_S9<<>>pfam07676===PD40
8025828739	Ga0609718_18_60055_60708	dipeptidyl aminopeptidase/acylaminoacyl peptidase	8025822726	Paenibacillus sp. ClWae2A	1	60055	60708		8025822743	COG1506===Dipeptidyl aminopeptidase/acylaminoacyl peptidase	pfam00326===Peptidase_S9
8025824225	Ga0609718_02_274474_275373	dipicolinate synthase subunit A	8025822726	Paenibacillus sp. ClWae2A	1	274474	275373		8025822727	COG0111===Phosphoglycerate dehydrogenase or related dehydrogenase	pfam16924===DpaA_N<<>>pfam01262===AlaDh_PNT_C
8025824224	Ga0609718_02_273881_274477	dipicolinate synthase subunit B	8025822726	Paenibacillus sp. ClWae2A	1	273881	274477		8025822727	COG0163===3-polyprenyl-4-hydroxybenzoate decarboxylase	pfam02441===Flavoprotein
8025828423	Ga0609718_15_29085_29534	disulfide bond formation protein DsbB	8025822726	Paenibacillus sp. ClWae2A	1	29085	29534		8025822740	COG1495===Disulfide bond formation protein DsbB	pfam02600===DsbB
8025824147	Ga0609718_02_193047_193424	DivIVA domain-containing protein	8025822726	Paenibacillus sp. ClWae2A	1	193047	193424		8025822727	COG3599===Cell division septum initiation DivIVA, interacts with FtsZ, MinD and other proteins	pfam05103===DivIVA
8025828269	Ga0609718_14_43455_44126	DMSO/TMAO reductase YedYZ molybdopterin-dependent catalytic subunit	8025822726	Paenibacillus sp. ClWae2A	1	43455	44126		8025822739	COG2041===Periplasmic DMSO/TMAO reductase YedYZ, molybdopterin-dependent catalytic subunit	pfam00174===Oxidored_molyb
8025826985	Ga0609718_07_199236_200150	DNA end-binding protein Ku	8025822726	Paenibacillus sp. ClWae2A	1	199236	200150		8025822732	COG1273===Non-homologous end joining protein Ku, dsDNA break repair	pfam02735===Ku
8025825794	Ga0609718_04_45016_47328	DNA excision repair protein ERCC-2	8025822726	Paenibacillus sp. ClWae2A	1	45016	47328		8025822729	COG1199===Rad3-related DNA helicase	pfam06733===DEAD_2<<>>pfam13307===Helicase_C_2<<>>pfam12705===PDDEXK_1
8025825292	Ga0609718_03_288935_290629	DNA excision repair protein ERCC-3	8025822726	Paenibacillus sp. ClWae2A	1	288935	290629		8025822728	COG1061===Superfamily II DNA or RNA helicase	pfam13625===Helicase_C_3<<>>pfam04851===ResIII<<>>pfam16203===ERCC3_RAD25_C
8025822771	Ga0609718_01_51840_52304	DNA gyrase inhibitor	8025822726	Paenibacillus sp. ClWae2A	1	51840	52304		8025822726	COG3449===DNA gyrase inhibitor GyrI	pfam06445===GyrI-like
8025827738	Ga0609718_11_1860_4421	DNA gyrase subunit A	8025822726	Paenibacillus sp. ClWae2A	1	1860	4421		8025822736	COG0188===DNA gyrase/topoisomerase IV, subunit A	pfam00521===DNA_topoisoIV<<>>pfam03989===DNA_gyraseA_C
8025827740	Ga0609718_11_5882_7792	DNA gyrase subunit B	8025822726	Paenibacillus sp. ClWae2A	1	5882	7792		8025822736	COG0187===DNA gyrase/topoisomerase IV, subunit B	pfam02518===HATPase_c<<>>pfam00986===DNA_gyraseB_C<<>>pfam01751===Toprim<<>>pfam00204===DNA_gyraseB
8025827137	Ga0609718_08_36725_38905	DNA helicase-2/ATP-dependent DNA helicase PcrA	8025822726	Paenibacillus sp. ClWae2A	1	36725	38905		8025822733	COG3973===DNA helicase IV	pfam13538===UvrD_C_2<<>>pfam13245===AAA_19
8025824385	Ga0609718_02_447660_450035	DNA helicase-2/ATP-dependent DNA helicase PcrA	8025822726	Paenibacillus sp. ClWae2A	1	447660	450035		8025822727	COG3973===DNA helicase IV	pfam13538===UvrD_C_2<<>>pfam13245===AAA_19
8025823033	Ga0609718_01_363903_366317	DNA helicase-2/ATP-dependent DNA helicase PcrA	8025822726	Paenibacillus sp. ClWae2A	1	363903	366317		8025822726	COG3973===DNA helicase IV	pfam00580===UvrD-helicase<<>>pfam13538===UvrD_C_2
8025826166	Ga0609718_04_473504_475858	DNA helicase-2/ATP-dependent DNA helicase PcrA	8025822726	Paenibacillus sp. ClWae2A	1	473504	475858		8025822729	COG0210===Superfamily I DNA or RNA helicase	pfam00580===UvrD-helicase<<>>pfam13361===UvrD_C
8025828084	Ga0609718_13_27278_29860	DNA helicase-2/ATP-dependent DNA helicase PcrA	8025822726	Paenibacillus sp. ClWae2A	1	27278	29860		8025822738	COG0210===Superfamily I DNA or RNA helicase	pfam14169===YdjO<<>>pfam13361===UvrD_C<<>>pfam13245===AAA_19
8025827986	Ga0609718_12_115604_117853	DNA helicase-2/ATP-dependent DNA helicase PcrA	8025822726	Paenibacillus sp. ClWae2A	1	115604	117853		8025822737	COG1074===ATP-dependent exoDNAse (exonuclease V) beta subunit (contains helicase and exonuclease domains)	pfam00580===UvrD-helicase<<>>pfam13361===UvrD_C
8025826167	Ga0609718_04_476068_478083	DNA ligase (NAD+)	8025822726	Paenibacillus sp. ClWae2A	1	476068	478083		8025822729	COG0272===NAD-dependent DNA ligase	pfam01653===DNA_ligase_aden<<>>pfam12826===HHH_2<<>>pfam03120===DNA_ligase_OB<<>>pfam14520===HHH_5<<>>pfam00533===BRCT
8025823678	Ga0609718_01_1110609_1112825	DNA mismatch repair protein MutL	8025822726	Paenibacillus sp. ClWae2A	1	1110609	1112825		8025822726	COG0323===DNA mismatch repair ATPase MutL	pfam01119===DNA_mis_repair<<>>pfam13589===HATPase_c_3<<>>pfam08676===MutL_C
8025823679	Ga0609718_01_1112847_1115651	DNA mismatch repair protein MutS	8025822726	Paenibacillus sp. ClWae2A	1	1112847	1115651		8025822726	COG0249===DNA mismatch repair ATPase MutS	pfam05188===MutS_II<<>>pfam05190===MutS_IV<<>>pfam05192===MutS_III<<>>pfam00488===MutS_V<<>>pfam01624===MutS_I
8025824878	Ga0609718_02_956978_959344	DNA mismatch repair protein MutS2	8025822726	Paenibacillus sp. ClWae2A	1	956978	959344		8025822727	COG1193===dsDNA-specific endonuclease/ATPase MutS2	pfam00488===MutS_V<<>>pfam01713===Smr
8025827194	Ga0609718_08_100906_102909	DNA mismatch repair protein MutS2	8025822726	Paenibacillus sp. ClWae2A	1	100906	102909		8025822733	COG1193===dsDNA-specific endonuclease/ATPase MutS2	pfam00488===MutS_V
8025824594	Ga0609718_02_687873_690527	DNA polymerase-1	8025822726	Paenibacillus sp. ClWae2A	1	687873	690527		8025822727	COG0258===5'-3' exonuclease<<>>COG0749===DNA polymerase I - 3'-5' exonuclease and polymerase domains	pfam02739===5_3_exonuc_N<<>>pfam01367===5_3_exonuc<<>>pfam00476===DNA_pol_A
8025824241	Ga0609718_02_289761_294080	DNA polymerase-3 subunit alpha (Gram-positive type)	8025822726	Paenibacillus sp. ClWae2A	1	289761	294080		8025822727	COG2176===DNA polymerase III, alpha subunit (gram-positive type)	pfam14480===DNA_pol3_a_NI<<>>pfam00929===RNase_T<<>>pfam02811===PHP<<>>pfam17657===DNA_pol3_finger<<>>pfam07733===DNA_pol3_alpha<<>>pfam11490===DNA_pol3_a_NII<<>>pfam14579===HHH_6
8025827744	Ga0609718_11_9599_10741	DNA polymerase-3 subunit beta	8025822726	Paenibacillus sp. ClWae2A	1	9599	10741		8025822736	COG0592===DNA polymerase III sliding clamp (beta) subunit, PCNA homolog	pfam02767===DNA_pol3_beta_2<<>>pfam00712===DNA_pol3_beta<<>>pfam02768===DNA_pol3_beta_3
8025823195	Ga0609718_01_558426_559550	DNA polymerase-3 subunit beta	8025822726	Paenibacillus sp. ClWae2A	1	558426	559550		8025822726	COG0592===DNA polymerase III sliding clamp (beta) subunit, PCNA homolog	pfam02768===DNA_pol3_beta_3<<>>pfam02767===DNA_pol3_beta_2<<>>pfam00712===DNA_pol3_beta
8025825514	Ga0609718_03_522325_523341	DNA polymerase-3 subunit delta	8025822726	Paenibacillus sp. ClWae2A	1	522325	523341		8025822728	COG1466===DNA polymerase III, delta subunit	pfam06144===DNA_pol3_delta
8025828838	Ga0609718_20_8366_9337	DNA polymerase-3 subunit delta'	8025822726	Paenibacillus sp. ClWae2A	1	8366	9337		8025822745	COG2812===DNA polymerase III, gamma/tau subunits	pfam13177===DNA_pol3_delta2<<>>pfam09115===DNApol3-delta_C
8025824475	Ga0609718_02_554754_555491	DNA polymerase-3 subunit epsilon	8025822726	Paenibacillus sp. ClWae2A	1	554754	555491		8025822727	COG2176===DNA polymerase III, alpha subunit (gram-positive type)	pfam00929===RNase_T
8025823974	Ga0609718_02_37703_38365	DNA polymerase-3 subunit epsilon	8025822726	Paenibacillus sp. ClWae2A	1	37703	38365		8025822727	COG2176===DNA polymerase III, alpha subunit (gram-positive type)	pfam00929===RNase_T
8025829078	Ga0609718_23_45906_47651	DNA polymerase-3 subunit gamma/tau	8025822726	Paenibacillus sp. ClWae2A	1	45906	47651		8025822748	COG2812===DNA polymerase III, gamma/tau subunits	pfam13177===DNA_pol3_delta2<<>>pfam12169===DNA_pol3_gamma3
8025825247	Ga0609718_03_235787_237031	DNA polymerase-4	8025822726	Paenibacillus sp. ClWae2A	1	235787	237031		8025822728	COG0389===Nucleotidyltransferase/DNA polymerase involved in DNA repair	pfam11799===IMS_C<<>>pfam00817===IMS
8025824470	Ga0609718_02_549924_551228	DNA polymerase-4	8025822726	Paenibacillus sp. ClWae2A	1	549924	551228		8025822727	COG0389===Nucleotidyltransferase/DNA polymerase involved in DNA repair	pfam11798===IMS_HHH<<>>pfam00817===IMS<<>>pfam11799===IMS_C
8025825465	Ga0609718_03_464940_466757	DNA primase	8025822726	Paenibacillus sp. ClWae2A	1	464940	466757		8025822728	COG0358===DNA primase (bacterial type)	pfam01807===zf-CHC2<<>>pfam08275===Toprim_N<<>>pfam10410===DnaB_bind<<>>pfam13155===Toprim_2
8025824292	Ga0609718_02_341858_342988	DNA processing protein	8025822726	Paenibacillus sp. ClWae2A	1	341858	342988		8025822727	COG0758===Predicted Rossmann fold nucleotide-binding protein DprA/Smf involved in DNA uptake	pfam17782===DprA_WH<<>>pfam02481===DNA_processg_A
8025823497	Ga0609718_01_917574_918392	DNA repair photolyase	8025822726	Paenibacillus sp. ClWae2A	1	917574	918392		8025822726	COG1533===DNA repair photolyase	pfam04055===Radical_SAM
8025829024	Ga0609718_22_55173_56540	DNA repair protein RadA/Sms	8025822726	Paenibacillus sp. ClWae2A	1	55173	56540		8025822747	COG1066===Predicted ATP-dependent serine protease	pfam13481===AAA_25<<>>pfam13541===ChlI<<>>pfam18073===Rubredoxin_2
8025826193	Ga0609718_05_19422_20111	DNA repair protein RadC	8025822726	Paenibacillus sp. ClWae2A	1	19422	20111		8025822730	COG2003===DNA repair protein RadC, contains a helix-hairpin-helix DNA-binding motif	pfam04002===RadC
8025825124	Ga0609718_03_106388_108106	DNA repair protein RecN (Recombination protein N)	8025822726	Paenibacillus sp. ClWae2A	1	106388	108106		8025822728	COG0497===DNA repair ATPase RecN	pfam02463===SMC_N
8025825469	Ga0609718_03_470868_471620	DNA repair protein RecO (recombination protein O)	8025822726	Paenibacillus sp. ClWae2A	1	470868	471620		8025822728	COG1381===Recombinational DNA repair protein (RecF pathway)	pfam02565===RecO_C<<>>pfam11967===RecO_N
8025827742	Ga0609718_11_8197_9309	DNA replication and repair protein RecF	8025822726	Paenibacillus sp. ClWae2A	1	8197	9309		8025822736	COG1195===Recombinational DNA repair ATPase RecF	pfam02463===SMC_N
8025823853	Ga0609718_01_1329299_1330003	DNA replication protein	8025822726	Paenibacillus sp. ClWae2A	1	1329299	1330003		8025822726	COG3935===DNA replication protein DnaD	pfam13730===HTH_36<<>>pfam07261===DnaB_2
8025824291	Ga0609718_02_339642_341741	DNA topoisomerase-1	8025822726	Paenibacillus sp. ClWae2A	1	339642	341741		8025822727	COG0550===DNA topoisomerase IA	pfam01396===zf-C4_Topoisom<<>>pfam01751===Toprim<<>>pfam01131===Topoisom_bac<<>>pfam02150===RNA_POL_M_15KD
8025823607	Ga0609718_01_1039280_1041619	DNA topoisomerase-3	8025822726	Paenibacillus sp. ClWae2A	1	1039280	1041619		8025822726	COG0550===DNA topoisomerase IA	pfam01751===Toprim<<>>pfam01131===Topoisom_bac
8025827565	Ga0609718_10_4604_6733	DNA topoisomerase-3	8025822726	Paenibacillus sp. ClWae2A	1	4604	6733		8025822735	COG1645===Uncharacterized Zn-finger containing protein, UPF0148 family<<>>COG0550===DNA topoisomerase IA	pfam01751===Toprim<<>>pfam01131===Topoisom_bac
8025824961	Ga0609718_02_1047442_1048908	DNA-binding beta-propeller fold protein YncE	8025822726	Paenibacillus sp. ClWae2A	1	1047442	1048908		8025822727	COG3391===DNA-binding beta-propeller fold protein YncE	pfam01436===NHL
8025825679	Ga0609718_03_710017_711603	DNA-binding beta-propeller fold protein YncE	8025822726	Paenibacillus sp. ClWae2A	1	710017	711603		8025822728	COG3391===DNA-binding beta-propeller fold protein YncE	pfam07833===Cu_amine_oxidN1
8025822729	Ga0609718_01_4318_5427	DNA-binding CsgD family transcriptional regulator	8025822726	Paenibacillus sp. ClWae2A	1	4318	5427		8025822726	COG2771===DNA-binding transcriptional regulator, CsgD family	pfam00196===GerE
8025825706	Ga0609718_03_740075_740836	DNA-binding CsgD family transcriptional regulator	8025822726	Paenibacillus sp. ClWae2A	1	740075	740836		8025822728	COG2771===DNA-binding transcriptional regulator, CsgD family	pfam00196===GerE
8025826057	Ga0609718_04_359493_360347	DNA-binding CsgD family transcriptional regulator/prefoldin subunit 5	8025822726	Paenibacillus sp. ClWae2A	1	359493	360347		8025822729	COG1730===Prefoldin subunit 5<<>>COG2771===DNA-binding transcriptional regulator, CsgD family
8025825440	Ga0609718_03_439162_440241	DNA-binding ferritin-like protein	8025822726	Paenibacillus sp. ClWae2A	1	439162	440241		8025822728	COG0783===DNA-binding ferritin-like protein (oxidative damage protectant)
8025828263	Ga0609718_14_39850_40251	DNA-binding FrmR family transcriptional regulator	8025822726	Paenibacillus sp. ClWae2A	1	39850	40251		8025822739	COG1937===DNA-binding transcriptional regulator, FrmR family	pfam02583===Trns_repr_metal
8025829175	Ga0609718_25_26166_26810	DNA-binding GntR family transcriptional regulator	8025822726	Paenibacillus sp. ClWae2A	1	26166	26810		8025822750	COG1802===DNA-binding transcriptional regulator, GntR family	pfam07729===FCD<<>>pfam00392===GntR
8025823457	Ga0609718_01_874846_875580	DNA-binding GntR family transcriptional regulator	8025822726	Paenibacillus sp. ClWae2A	1	874846	875580		8025822726	COG1802===DNA-binding transcriptional regulator, GntR family	pfam07729===FCD<<>>pfam00392===GntR
8025823649	Ga0609718_01_1083769_1084443	DNA-binding GntR family transcriptional regulator	8025822726	Paenibacillus sp. ClWae2A	1	1083769	1084443		8025822726	COG1802===DNA-binding transcriptional regulator, GntR family	pfam00392===GntR<<>>pfam07729===FCD
8025824555	Ga0609718_02_633355_633975	DNA-binding GntR family transcriptional regulator	8025822726	Paenibacillus sp. ClWae2A	1	633355	633975		8025822727	COG1802===DNA-binding transcriptional regulator, GntR family	pfam00392===GntR<<>>pfam07729===FCD
8025827481	Ga0609718_09_139889_140284	DNA-binding HxlR family transcriptional regulator	8025822726	Paenibacillus sp. ClWae2A	1	139889	140284		8025822734	COG1733===DNA-binding transcriptional regulator, HxlR family	pfam01638===HxlR
8025827534	Ga0609718_09_199502_199876	DNA-binding HxlR family transcriptional regulator	8025822726	Paenibacillus sp. ClWae2A	1	199502	199876		8025822734	COG1733===DNA-binding transcriptional regulator, HxlR family	pfam01638===HxlR
8025826453	Ga0609718_05_318150_318470	DNA-binding HxlR family transcriptional regulator	8025822726	Paenibacillus sp. ClWae2A	1	318150	318470		8025822730	COG1733===DNA-binding transcriptional regulator, HxlR family	pfam01638===HxlR
8025825778	Ga0609718_04_32161_32496	DNA-binding HxlR family transcriptional regulator	8025822726	Paenibacillus sp. ClWae2A	1	32161	32496		8025822729	COG1733===DNA-binding transcriptional regulator, HxlR family	pfam01638===HxlR
8025823015	Ga0609718_01_347895_348260	DNA-binding HxlR family transcriptional regulator	8025822726	Paenibacillus sp. ClWae2A	1	347895	348260		8025822726	COG1733===DNA-binding transcriptional regulator, HxlR family	pfam01638===HxlR
8025823994	Ga0609718_02_61096_61455	DNA-binding HxlR family transcriptional regulator	8025822726	Paenibacillus sp. ClWae2A	1	61096	61455		8025822727	COG1733===DNA-binding transcriptional regulator, HxlR family	pfam01638===HxlR
8025823176	Ga0609718_01_540463_540813	DNA-binding HxlR family transcriptional regulator	8025822726	Paenibacillus sp. ClWae2A	1	540463	540813		8025822726	COG1733===DNA-binding transcriptional regulator, HxlR family	pfam01638===HxlR
8025823032	Ga0609718_01_363216_363533	DNA-binding HxlR family transcriptional regulator	8025822726	Paenibacillus sp. ClWae2A	1	363216	363533		8025822726	COG1733===DNA-binding transcriptional regulator, HxlR family	pfam01638===HxlR
8025828543	Ga0609718_16_36176_36574	DNA-binding HxlR family transcriptional regulator	8025822726	Paenibacillus sp. ClWae2A	1	36176	36574		8025822741	COG1733===DNA-binding transcriptional regulator, HxlR family	pfam01638===HxlR
8025822785	Ga0609718_01_70412_70801	DNA-binding HxlR family transcriptional regulator	8025822726	Paenibacillus sp. ClWae2A	1	70412	70801		8025822726	COG1733===DNA-binding transcriptional regulator, HxlR family	pfam01638===HxlR
8025823155	Ga0609718_01_516757_517104	DNA-binding HxlR family transcriptional regulator	8025822726	Paenibacillus sp. ClWae2A	1	516757	517104		8025822726	COG1733===DNA-binding transcriptional regulator, HxlR family	pfam01638===HxlR
8025825179	Ga0609718_03_165944_166261	DNA-binding HxlR family transcriptional regulator	8025822726	Paenibacillus sp. ClWae2A	1	165944	166261		8025822728	COG1733===DNA-binding transcriptional regulator, HxlR family	pfam01638===HxlR
8025824544	Ga0609718_02_620174_620536	DNA-binding HxlR family transcriptional regulator	8025822726	Paenibacillus sp. ClWae2A	1	620174	620536		8025822727	COG1733===DNA-binding transcriptional regulator, HxlR family	pfam01638===HxlR
8025828631	Ga0609718_17_27828_28571	DNA-binding IclR family transcriptional regulator	8025822726	Paenibacillus sp. ClWae2A	1	27828	28571		8025822742	COG1414===DNA-binding transcriptional regulator, IclR family	pfam01614===IclR<<>>pfam09339===HTH_IclR
8025827475	Ga0609718_09_134336_135133	DNA-binding IclR family transcriptional regulator	8025822726	Paenibacillus sp. ClWae2A	1	134336	135133		8025822734	COG1414===DNA-binding transcriptional regulator, IclR family	pfam01614===IclR<<>>pfam09339===HTH_IclR
8025825573	Ga0609718_03_582860_583285	DNA-binding IscR family transcriptional regulator	8025822726	Paenibacillus sp. ClWae2A	1	582860	583285		8025822728	COG1959===DNA-binding transcriptional regulator, IscR family	pfam02082===Rrf2
8025823192	Ga0609718_01_555552_556517	DNA-binding LacI/PurR family transcriptional regulator	8025822726	Paenibacillus sp. ClWae2A	1	555552	556517		8025822726	COG1609===DNA-binding transcriptional regulator, LacI/PurR family	pfam13377===Peripla_BP_3<<>>pfam00356===LacI
8025822871	Ga0609718_01_194979_195947	DNA-binding LacI/PurR family transcriptional regulator	8025822726	Paenibacillus sp. ClWae2A	1	194979	195947		8025822726	COG1609===DNA-binding transcriptional regulator, LacI/PurR family	pfam13377===Peripla_BP_3<<>>pfam00356===LacI
8025822746	Ga0609718_01_24326_25363	DNA-binding LacI/PurR family transcriptional regulator	8025822726	Paenibacillus sp. ClWae2A	1	24326	25363		8025822726	COG1609===DNA-binding transcriptional regulator, LacI/PurR family	pfam13377===Peripla_BP_3<<>>pfam00356===LacI
8025822875	Ga0609718_01_197312_198346	DNA-binding LacI/PurR family transcriptional regulator	8025822726	Paenibacillus sp. ClWae2A	1	197312	198346		8025822726	COG1609===DNA-binding transcriptional regulator, LacI/PurR family	pfam13377===Peripla_BP_3<<>>pfam00356===LacI
8025829154	Ga0609718_25_9151_10158	DNA-binding LacI/PurR family transcriptional regulator	8025822726	Paenibacillus sp. ClWae2A	1	9151	10158		8025822750	COG1609===DNA-binding transcriptional regulator, LacI/PurR family	pfam00356===LacI<<>>pfam13377===Peripla_BP_3
8025826706	Ga0609718_06_229471_230505	DNA-binding LacI/PurR family transcriptional regulator	8025822726	Paenibacillus sp. ClWae2A	1	229471	230505		8025822731	COG1609===DNA-binding transcriptional regulator, LacI/PurR family	pfam13377===Peripla_BP_3<<>>pfam00356===LacI
8025824149	Ga0609718_02_194387_195079	DNA-binding Lrp family transcriptional regulator	8025822726	Paenibacillus sp. ClWae2A	1	194387	195079		8025822727	COG1522===DNA-binding transcriptional regulator, Lrp family	pfam12840===HTH_20
8025824871	Ga0609718_02_951726_952226	DNA-binding Lrp family transcriptional regulator	8025822726	Paenibacillus sp. ClWae2A	1	951726	952226		8025822727	COG1522===DNA-binding transcriptional regulator, Lrp family	pfam01037===AsnC_trans_reg
8025824731	Ga0609718_02_795318_795635	DNA-binding LytR/AlgR family response regulator	8025822726	Paenibacillus sp. ClWae2A	1	795318	795635		8025822727	COG3279===DNA-binding response regulator, LytR/AlgR family	pfam04397===LytTR
8025823809	Ga0609718_01_1272783_1273229	DNA-binding MarR family transcriptional regulator	8025822726	Paenibacillus sp. ClWae2A	1	1272783	1273229		8025822726	COG1846===DNA-binding transcriptional regulator, MarR family	pfam01047===MarR
8025827499	Ga0609718_09_161637_162152	DNA-binding MarR family transcriptional regulator	8025822726	Paenibacillus sp. ClWae2A	1	161637	162152		8025822734	COG1846===DNA-binding transcriptional regulator, MarR family	pfam01047===MarR
8025825803	Ga0609718_04_58588_59130	DNA-binding MarR family transcriptional regulator	8025822726	Paenibacillus sp. ClWae2A	1	58588	59130		8025822729	COG1846===DNA-binding transcriptional regulator, MarR family	pfam01047===MarR
8025824295	Ga0609718_02_345630_346085	DNA-binding MarR family transcriptional regulator	8025822726	Paenibacillus sp. ClWae2A	1	345630	346085		8025822727	COG1846===DNA-binding transcriptional regulator, MarR family	pfam01047===MarR
8025826566	Ga0609718_06_66764_67198	DNA-binding MarR family transcriptional regulator	8025822726	Paenibacillus sp. ClWae2A	1	66764	67198		8025822731	COG1846===DNA-binding transcriptional regulator, MarR family	pfam01047===MarR
8025823019	Ga0609718_01_350819_351256	DNA-binding MarR family transcriptional regulator	8025822726	Paenibacillus sp. ClWae2A	1	350819	351256		8025822726	COG1846===DNA-binding transcriptional regulator, MarR family	pfam12802===MarR_2
8025824577	Ga0609718_02_661541_662068	DNA-binding MarR family transcriptional regulator	8025822726	Paenibacillus sp. ClWae2A	1	661541	662068		8025822727	COG1846===DNA-binding transcriptional regulator, MarR family	pfam12802===MarR_2
8025822953	Ga0609718_01_285470_285892	DNA-binding MarR family transcriptional regulator	8025822726	Paenibacillus sp. ClWae2A	1	285470	285892		8025822726	COG1846===DNA-binding transcriptional regulator, MarR family	pfam12802===MarR_2
8025825608	Ga0609718_03_620933_621379	DNA-binding MarR family transcriptional regulator	8025822726	Paenibacillus sp. ClWae2A	1	620933	621379		8025822728	COG1846===DNA-binding transcriptional regulator, MarR family	pfam12802===MarR_2
8025827735	Ga0609718_10_205393_205824	DNA-binding MarR family transcriptional regulator	8025822726	Paenibacillus sp. ClWae2A	1	205393	205824		8025822735	COG1846===DNA-binding transcriptional regulator, MarR family	pfam01047===MarR
8025824509	Ga0609718_02_588261_588821	DNA-binding MarR family transcriptional regulator	8025822726	Paenibacillus sp. ClWae2A	1	588261	588821		8025822727	COG1846===DNA-binding transcriptional regulator, MarR family	pfam01047===MarR
8025823318	Ga0609718_01_730312_730752	DNA-binding MarR family transcriptional regulator	8025822726	Paenibacillus sp. ClWae2A	1	730312	730752		8025822726	COG1846===DNA-binding transcriptional regulator, MarR family	pfam01047===MarR
8025824412	Ga0609718_02_480922_481404	DNA-binding MarR family transcriptional regulator	8025822726	Paenibacillus sp. ClWae2A	1	480922	481404		8025822727	COG1846===DNA-binding transcriptional regulator, MarR family	pfam01047===MarR
8025823810	Ga0609718_01_1273505_1273945	DNA-binding MarR family transcriptional regulator	8025822726	Paenibacillus sp. ClWae2A	1	1273505	1273945		8025822726	COG1846===DNA-binding transcriptional regulator, MarR family	pfam01047===MarR
8025828337	Ga0609718_14_115477_115632	DNA-binding MarR family transcriptional regulator	8025822726	Paenibacillus sp. ClWae2A	1	115477	115632		8025822739	COG1846===DNA-binding transcriptional regulator, MarR family
8025824361	Ga0609718_02_418864_419322	DNA-binding MarR family transcriptional regulator	8025822726	Paenibacillus sp. ClWae2A	1	418864	419322		8025822727	COG1846===DNA-binding transcriptional regulator, MarR family	pfam01047===MarR
8025824573	Ga0609718_02_658352_658771	DNA-binding MarR family transcriptional regulator	8025822726	Paenibacillus sp. ClWae2A	1	658352	658771		8025822727	COG1846===DNA-binding transcriptional regulator, MarR family	pfam01047===MarR
8025827479	Ga0609718_09_138619_139080	DNA-binding MarR family transcriptional regulator	8025822726	Paenibacillus sp. ClWae2A	1	138619	139080		8025822734	COG1846===DNA-binding transcriptional regulator, MarR family	pfam01047===MarR
8025828082	Ga0609718_13_25238_26071	DNA-binding MarR family transcriptional regulator	8025822726	Paenibacillus sp. ClWae2A	1	25238	26071		8025822738	COG1846===DNA-binding transcriptional regulator, MarR family	pfam01978===TrmB
8025829189	Ga0609718_26_8719_9162	DNA-binding MarR family transcriptional regulator	8025822726	Paenibacillus sp. ClWae2A	1	8719	9162		8025822751	COG1846===DNA-binding transcriptional regulator, MarR family	pfam12802===MarR_2
8025826262	Ga0609718_05_106885_107748	DNA-binding MurR/RpiR family transcriptional regulator	8025822726	Paenibacillus sp. ClWae2A	1	106885	107748		8025822730	COG1737===DNA-binding transcriptional regulator, MurR/RpiR family, contains HTH and SIS domains	pfam01380===SIS<<>>pfam01418===HTH_6
8025828367	Ga0609718_14_151400_152248	DNA-binding MurR/RpiR family transcriptional regulator	8025822726	Paenibacillus sp. ClWae2A	1	151400	152248		8025822739	COG1737===DNA-binding transcriptional regulator, MurR/RpiR family, contains HTH and SIS domains	pfam01380===SIS<<>>pfam01418===HTH_6
8025828281	Ga0609718_14_55125_55781	DNA-binding NarL/FixJ family response regulator	8025822726	Paenibacillus sp. ClWae2A	1	55125	55781		8025822739	COG2197===DNA-binding response regulator, NarL/FixJ family, contains REC and HTH domains	pfam00196===GerE<<>>pfam00072===Response_reg
8025826144	Ga0609718_04_441522_442211	DNA-binding NarL/FixJ family response regulator	8025822726	Paenibacillus sp. ClWae2A	1	441522	442211		8025822729	COG2197===DNA-binding response regulator, NarL/FixJ family, contains REC and HTH domains	pfam00072===Response_reg<<>>pfam00196===GerE
8025827078	Ga0609718_07_299410_300144	DNA-binding NarL/FixJ family response regulator	8025822726	Paenibacillus sp. ClWae2A	1	299410	300144		8025822732	COG2197===DNA-binding response regulator, NarL/FixJ family, contains REC and HTH domains	pfam00196===GerE<<>>pfam00072===Response_reg
8025828216	Ga0609718_13_172906_173418	DNA-binding PadR family transcriptional regulator	8025822726	Paenibacillus sp. ClWae2A	1	172906	173418		8025822738	COG1695===DNA-binding transcriptional regulator, PadR family	pfam03551===PadR<<>>pfam10400===Vir_act_alpha_C
8025824154	Ga0609718_02_198762_199136	DNA-binding PadR family transcriptional regulator	8025822726	Paenibacillus sp. ClWae2A	1	198762	199136		8025822727	COG1695===DNA-binding transcriptional regulator, PadR family	pfam02334===RTP
8025823911	Ga0609718_01_1383160_1383543	DNA-binding protein HU-beta	8025822726	Paenibacillus sp. ClWae2A	1	1383160	1383543		8025822726	COG0776===Bacterial nucleoid DNA-binding protein	pfam00216===Bac_DNA_binding
8025828867	Ga0609718_20_37345_37617	DNA-binding protein HU-beta	8025822726	Paenibacillus sp. ClWae2A	1	37345	37617		8025822745	COG0776===Bacterial nucleoid DNA-binding protein	pfam00216===Bac_DNA_binding
8025828013	Ga0609718_12_149926_150864	DNA-binding protein WhiA	8025822726	Paenibacillus sp. ClWae2A	1	149926	150864		8025822737	COG1481===DNA-binding transcriptional regulator WhiA, involved in cell division	pfam14527===LAGLIDADG_WhiA<<>>pfam02650===HTH_WhiA<<>>pfam10298===WhiA_N
8025826461	Ga0609718_05_324382_325062	DNA-binding response OmpR family regulator	8025822726	Paenibacillus sp. ClWae2A	1	324382	325062		8025822730	COG0745===DNA-binding response regulator, OmpR family, contains REC and winged-helix (wHTH) domain	pfam00486===Trans_reg_C<<>>pfam00072===Response_reg
8025823347	Ga0609718_01_759778_760485	DNA-binding response OmpR family regulator	8025822726	Paenibacillus sp. ClWae2A	1	759778	760485		8025822726	COG0745===DNA-binding response regulator, OmpR family, contains REC and winged-helix (wHTH) domain	pfam00486===Trans_reg_C<<>>pfam00072===Response_reg
8025825660	Ga0609718_03_687451_688161	DNA-binding response OmpR family regulator	8025822726	Paenibacillus sp. ClWae2A	1	687451	688161		8025822728	COG0745===DNA-binding response regulator, OmpR family, contains REC and winged-helix (wHTH) domain	pfam00486===Trans_reg_C<<>>pfam00072===Response_reg
8025828214	Ga0609718_13_170096_170779	DNA-binding response OmpR family regulator	8025822726	Paenibacillus sp. ClWae2A	1	170096	170779		8025822738	COG0745===DNA-binding response regulator, OmpR family, contains REC and winged-helix (wHTH) domain	pfam00072===Response_reg<<>>pfam00486===Trans_reg_C
8025823215	Ga0609718_01_582321_583013	DNA-binding response OmpR family regulator	8025822726	Paenibacillus sp. ClWae2A	1	582321	583013		8025822726	COG0745===DNA-binding response regulator, OmpR family, contains REC and winged-helix (wHTH) domain	pfam00072===Response_reg<<>>pfam00486===Trans_reg_C
8025828291	Ga0609718_14_68980_69693	DNA-binding response OmpR family regulator	8025822726	Paenibacillus sp. ClWae2A	1	68980	69693		8025822739	COG0745===DNA-binding response regulator, OmpR family, contains REC and winged-helix (wHTH) domain	pfam00486===Trans_reg_C<<>>pfam00072===Response_reg
8025822941	Ga0609718_01_269105_269779	DNA-binding response OmpR family regulator	8025822726	Paenibacillus sp. ClWae2A	1	269105	269779		8025822726	COG0745===DNA-binding response regulator, OmpR family, contains REC and winged-helix (wHTH) domain	pfam00072===Response_reg<<>>pfam00486===Trans_reg_C
8025823601	Ga0609718_01_1033093_1033791	DNA-binding response OmpR family regulator	8025822726	Paenibacillus sp. ClWae2A	1	1033093	1033791		8025822726	COG0745===DNA-binding response regulator, OmpR family, contains REC and winged-helix (wHTH) domain	pfam00486===Trans_reg_C<<>>pfam00072===Response_reg
8025822947	Ga0609718_01_277387_278061	DNA-binding response OmpR family regulator	8025822726	Paenibacillus sp. ClWae2A	1	277387	278061		8025822726	COG0745===DNA-binding response regulator, OmpR family, contains REC and winged-helix (wHTH) domain	pfam00072===Response_reg<<>>pfam00486===Trans_reg_C
8025822756	Ga0609718_01_38044_38751	DNA-binding response OmpR family regulator	8025822726	Paenibacillus sp. ClWae2A	1	38044	38751		8025822726	COG0745===DNA-binding response regulator, OmpR family, contains REC and winged-helix (wHTH) domain	pfam00486===Trans_reg_C<<>>pfam00072===Response_reg
8025827674	Ga0609718_10_134122_134841	DNA-binding response OmpR family regulator	8025822726	Paenibacillus sp. ClWae2A	1	134122	134841		8025822735	COG0745===DNA-binding response regulator, OmpR family, contains REC and winged-helix (wHTH) domain	pfam00072===Response_reg<<>>pfam00486===Trans_reg_C
8025827887	Ga0609718_11_172275_172958	DNA-binding response OmpR family regulator	8025822726	Paenibacillus sp. ClWae2A	1	172275	172958		8025822736	COG0745===DNA-binding response regulator, OmpR family, contains REC and winged-helix (wHTH) domain	pfam00486===Trans_reg_C<<>>pfam00072===Response_reg
8025826609	Ga0609718_06_121054_121767	DNA-binding response OmpR family regulator	8025822726	Paenibacillus sp. ClWae2A	1	121054	121767		8025822731	COG0745===DNA-binding response regulator, OmpR family, contains REC and winged-helix (wHTH) domain	pfam00072===Response_reg<<>>pfam00486===Trans_reg_C
8025823442	Ga0609718_01_858933_859217	DNA-binding transcriptional ArsR family regulator	8025822726	Paenibacillus sp. ClWae2A	1	858933	859217		8025822726	COG0640===DNA-binding transcriptional regulator, ArsR family	pfam12840===HTH_20
8025828401	Ga0609718_15_6195_6518	DNA-binding transcriptional ArsR family regulator	8025822726	Paenibacillus sp. ClWae2A	1	6195	6518		8025822740	COG0640===DNA-binding transcriptional regulator, ArsR family	pfam12840===HTH_20
8025823534	Ga0609718_01_964311_965219	DNA-binding transcriptional ArsR family regulator	8025822726	Paenibacillus sp. ClWae2A	1	964311	965219		8025822726	COG0640===DNA-binding transcriptional regulator, ArsR family	pfam01022===HTH_5
8025829194	Ga0609718_26_13155_13526	DNA-binding transcriptional ArsR family regulator	8025822726	Paenibacillus sp. ClWae2A	1	13155	13526		8025822751	COG0640===DNA-binding transcriptional regulator, ArsR family	pfam01022===HTH_5
8025823605	Ga0609718_01_1037517_1038437	DNA-binding transcriptional ArsR family regulator	8025822726	Paenibacillus sp. ClWae2A	1	1037517	1038437		8025822726	COG0640===DNA-binding transcriptional regulator, ArsR family	pfam12840===HTH_20
8025826918	Ga0609718_07_123662_124360	DNA-binding transcriptional ArsR family regulator	8025822726	Paenibacillus sp. ClWae2A	1	123662	124360		8025822732	COG0640===DNA-binding transcriptional regulator, ArsR family	pfam12840===HTH_20
8025825767	Ga0609718_04_19184_19501	DNA-binding transcriptional ArsR family regulator	8025822726	Paenibacillus sp. ClWae2A	1	19184	19501		8025822729	COG0640===DNA-binding transcriptional regulator, ArsR family	pfam12840===HTH_20
8025826211	Ga0609718_05_40358_40945	DNA-binding transcriptional ArsR family regulator	8025822726	Paenibacillus sp. ClWae2A	1	40358	40945		8025822730	COG0640===DNA-binding transcriptional regulator, ArsR family
8025827670	Ga0609718_10_128909_129238	DNA-binding transcriptional ArsR family regulator	8025822726	Paenibacillus sp. ClWae2A	1	128909	129238		8025822735	COG0640===DNA-binding transcriptional regulator, ArsR family	pfam12840===HTH_20
8025829191	Ga0609718_26_10026_10337	DNA-binding transcriptional ArsR family regulator	8025822726	Paenibacillus sp. ClWae2A	1	10026	10337		8025822751	COG0640===DNA-binding transcriptional regulator, ArsR family
8025827278	Ga0609718_08_191968_192873	DNA-binding transcriptional ArsR family regulator	8025822726	Paenibacillus sp. ClWae2A	1	191968	192873		8025822733	COG0640===DNA-binding transcriptional regulator, ArsR family	pfam01022===HTH_5
8025828326	Ga0609718_14_104237_105100	DNA-binding transcriptional LysR family regulator	8025822726	Paenibacillus sp. ClWae2A	1	104237	105100		8025822739	COG0583===DNA-binding transcriptional regulator, LysR family	pfam00126===HTH_1<<>>pfam03466===LysR_substrate
8025824018	Ga0609718_02_86456_87331	DNA-binding transcriptional LysR family regulator	8025822726	Paenibacillus sp. ClWae2A	1	86456	87331		8025822727	COG0583===DNA-binding transcriptional regulator, LysR family	pfam00126===HTH_1<<>>pfam03466===LysR_substrate
8025826334	Ga0609718_05_185398_186300	DNA-binding transcriptional LysR family regulator	8025822726	Paenibacillus sp. ClWae2A	1	185398	186300		8025822730	COG0583===DNA-binding transcriptional regulator, LysR family	pfam03466===LysR_substrate<<>>pfam00126===HTH_1
8025824547	Ga0609718_02_623264_624166	DNA-binding transcriptional LysR family regulator	8025822726	Paenibacillus sp. ClWae2A	1	623264	624166		8025822727	COG0583===DNA-binding transcriptional regulator, LysR family	pfam00126===HTH_1<<>>pfam03466===LysR_substrate
8025824583	Ga0609718_02_669382_670311	DNA-binding transcriptional LysR family regulator	8025822726	Paenibacillus sp. ClWae2A	1	669382	670311		8025822727	COG0583===DNA-binding transcriptional regulator, LysR family	pfam00126===HTH_1<<>>pfam03466===LysR_substrate
8025826342	Ga0609718_05_194282_195205	DNA-binding transcriptional LysR family regulator	8025822726	Paenibacillus sp. ClWae2A	1	194282	195205		8025822730	COG0583===DNA-binding transcriptional regulator, LysR family	pfam00126===HTH_1<<>>pfam03466===LysR_substrate
8025825287	Ga0609718_03_284636_285559	DNA-binding transcriptional LysR family regulator	8025822726	Paenibacillus sp. ClWae2A	1	284636	285559		8025822728	COG0583===DNA-binding transcriptional regulator, LysR family	pfam00126===HTH_1<<>>pfam03466===LysR_substrate
8025826718	Ga0609718_06_243681_244592	DNA-binding transcriptional LysR family regulator	8025822726	Paenibacillus sp. ClWae2A	1	243681	244592		8025822731	COG0583===DNA-binding transcriptional regulator, LysR family	pfam00126===HTH_1<<>>pfam03466===LysR_substrate
8025826734	Ga0609718_06_263716_264618	DNA-binding transcriptional LysR family regulator	8025822726	Paenibacillus sp. ClWae2A	1	263716	264618		8025822731	COG0583===DNA-binding transcriptional regulator, LysR family	pfam00126===HTH_1<<>>pfam03466===LysR_substrate
8025823153	Ga0609718_01_515176_516060	DNA-binding transcriptional LysR family regulator	8025822726	Paenibacillus sp. ClWae2A	1	515176	516060		8025822726	COG0583===DNA-binding transcriptional regulator, LysR family	pfam00126===HTH_1<<>>pfam03466===LysR_substrate
8025825785	Ga0609718_04_37088_37972	DNA-binding transcriptional LysR family regulator	8025822726	Paenibacillus sp. ClWae2A	1	37088	37972		8025822729	COG0583===DNA-binding transcriptional regulator, LysR family	pfam00126===HTH_1<<>>pfam03466===LysR_substrate
8025823749	Ga0609718_01_1210761_1211627	DNA-binding transcriptional LysR family regulator	8025822726	Paenibacillus sp. ClWae2A	1	1210761	1211627		8025822726	COG0583===DNA-binding transcriptional regulator, LysR family	pfam03466===LysR_substrate<<>>pfam00126===HTH_1
8025825699	Ga0609718_03_731207_732112	DNA-binding transcriptional LysR family regulator	8025822726	Paenibacillus sp. ClWae2A	1	731207	732112		8025822728	COG0583===DNA-binding transcriptional regulator, LysR family	pfam00126===HTH_1<<>>pfam03466===LysR_substrate
8025826737	Ga0609718_06_266450_267310	DNA-binding transcriptional LysR family regulator	8025822726	Paenibacillus sp. ClWae2A	1	266450	267310		8025822731	COG0583===DNA-binding transcriptional regulator, LysR family	pfam00126===HTH_1<<>>pfam03466===LysR_substrate
8025823738	Ga0609718_01_1199506_1200390	DNA-binding transcriptional LysR family regulator	8025822726	Paenibacillus sp. ClWae2A	1	1199506	1200390		8025822726	COG0583===DNA-binding transcriptional regulator, LysR family	pfam00126===HTH_1<<>>pfam03466===LysR_substrate
8025828741	Ga0609718_18_61619_62515	DNA-binding transcriptional LysR family regulator	8025822726	Paenibacillus sp. ClWae2A	1	61619	62515		8025822743	COG0583===DNA-binding transcriptional regulator, LysR family	pfam03466===LysR_substrate<<>>pfam00126===HTH_1
8025827140	Ga0609718_08_40808_41698	DNA-binding transcriptional LysR family regulator	8025822726	Paenibacillus sp. ClWae2A	1	40808	41698		8025822733	COG0583===DNA-binding transcriptional regulator, LysR family	pfam00126===HTH_1<<>>pfam03466===LysR_substrate
8025826306	Ga0609718_05_149475_150347	DNA-binding transcriptional LysR family regulator	8025822726	Paenibacillus sp. ClWae2A	1	149475	150347		8025822730	COG0583===DNA-binding transcriptional regulator, LysR family	pfam03466===LysR_substrate<<>>pfam00126===HTH_1
8025828375	Ga0609718_14_161835_162743	DNA-binding transcriptional LysR family regulator	8025822726	Paenibacillus sp. ClWae2A	1	161835	162743		8025822739	COG0583===DNA-binding transcriptional regulator, LysR family	pfam00126===HTH_1<<>>pfam03466===LysR_substrate
8025826656	Ga0609718_06_168586_169326	DNA-binding transcriptional MerR regulator	8025822726	Paenibacillus sp. ClWae2A	1	168586	169326		8025822731	COG0789===DNA-binding transcriptional regulator, MerR family	pfam13411===MerR_1<<>>pfam07739===TipAS
8025827698	Ga0609718_10_160434_161417	DNA-binding transcriptional MerR regulator	8025822726	Paenibacillus sp. ClWae2A	1	160434	161417		8025822735	COG0789===DNA-binding transcriptional regulator, MerR family	pfam13411===MerR_1
8025825959	Ga0609718_04_256645_257604	DNA-binding transcriptional MerR regulator	8025822726	Paenibacillus sp. ClWae2A	1	256645	257604		8025822729	COG0789===DNA-binding transcriptional regulator, MerR family	pfam02310===B12-binding<<>>pfam13411===MerR_1<<>>pfam02607===B12-binding_2
8025826134	Ga0609718_04_429847_430470	DNA-binding transcriptional MerR regulator	8025822726	Paenibacillus sp. ClWae2A	1	429847	430470		8025822729	COG0789===DNA-binding transcriptional regulator, MerR family	pfam13171===DUF4004
8025823747	Ga0609718_01_1209406_1210161	DNA-binding transcriptional MerR regulator	8025822726	Paenibacillus sp. ClWae2A	1	1209406	1210161		8025822726	COG0789===DNA-binding transcriptional regulator, MerR family	pfam13411===MerR_1
8025823337	Ga0609718_01_752688_753137	DNA-binding transcriptional MerR regulator	8025822726	Paenibacillus sp. ClWae2A	1	752688	753137		8025822726	COG0789===DNA-binding transcriptional regulator, MerR family	pfam13411===MerR_1
8025823538	Ga0609718_01_967845_968267	DNA-binding transcriptional MerR regulator	8025822726	Paenibacillus sp. ClWae2A	1	967845	968267		8025822726	COG0789===DNA-binding transcriptional regulator, MerR family	pfam13411===MerR_1
8025826778	Ga0609718_06_319620_320363	DNA-binding transcriptional MerR regulator	8025822726	Paenibacillus sp. ClWae2A	1	319620	320363		8025822731	COG0789===DNA-binding transcriptional regulator, MerR family	pfam13411===MerR_1<<>>pfam07739===TipAS
8025823228	Ga0609718_01_601467_602231	DNA-binding transcriptional MerR regulator	8025822726	Paenibacillus sp. ClWae2A	1	601467	602231		8025822726	COG0789===DNA-binding transcriptional regulator, MerR family	pfam13411===MerR_1
8025823025	Ga0609718_01_355583_355996	DNA-binding transcriptional MerR regulator	8025822726	Paenibacillus sp. ClWae2A	1	355583	355996		8025822726	COG0789===DNA-binding transcriptional regulator, MerR family	pfam13411===MerR_1
8025823051	Ga0609718_01_387491_387847	DNA-binding transcriptional MerR regulator	8025822726	Paenibacillus sp. ClWae2A	1	387491	387847		8025822726	COG0789===DNA-binding transcriptional regulator, MerR family	pfam13411===MerR_1
8025822827	Ga0609718_01_134833_135192	DNA-binding transcriptional MerR regulator	8025822726	Paenibacillus sp. ClWae2A	1	134833	135192		8025822726	COG0789===DNA-binding transcriptional regulator, MerR family	pfam13411===MerR_1
8025829202	Ga0609718_26_21318_22130	DNA-binding transcriptional MerR regulator	8025822726	Paenibacillus sp. ClWae2A	1	21318	22130		8025822751	COG0789===DNA-binding transcriptional regulator, MerR family	pfam07739===TipAS<<>>pfam13411===MerR_1
8025823270	Ga0609718_01_657319_658137	DNA-binding transcriptional MerR regulator	8025822726	Paenibacillus sp. ClWae2A	1	657319	658137		8025822726	COG0789===DNA-binding transcriptional regulator, MerR family	pfam06445===GyrI-like<<>>pfam13411===MerR_1
8025827221	Ga0609718_08_137546_137980	DNA-binding transcriptional MerR regulator	8025822726	Paenibacillus sp. ClWae2A	1	137546	137980		8025822733	COG0789===DNA-binding transcriptional regulator, MerR family	pfam13411===MerR_1
8025828206	Ga0609718_13_159729_160415	DNA-binding transcriptional MerR regulator	8025822726	Paenibacillus sp. ClWae2A	1	159729	160415		8025822738	COG0789===DNA-binding transcriptional regulator, MerR family
8025829197	Ga0609718_26_16862_17314	DNA-binding transcriptional MerR regulator	8025822726	Paenibacillus sp. ClWae2A	1	16862	17314		8025822751	COG0789===DNA-binding transcriptional regulator, MerR family	pfam13411===MerR_1
8025827508	Ga0609718_09_170466_171917	DNA-binding transcriptional MocR family regulator	8025822726	Paenibacillus sp. ClWae2A	1	170466	171917		8025822734	COG1167===DNA-binding transcriptional regulator, MocR family, contains an aminotransferase domain	pfam00155===Aminotran_1_2<<>>pfam00392===GntR
8025825810	Ga0609718_04_66479_66898	DNA-binding transcriptional MocR family regulator	8025822726	Paenibacillus sp. ClWae2A	1	66479	66898		8025822729	COG1167===DNA-binding transcriptional regulator, MocR family, contains an aminotransferase domain
8025828668	Ga0609718_17_65060_66445	DNA-binding transcriptional MocR family regulator	8025822726	Paenibacillus sp. ClWae2A	1	65060	66445		8025822742	COG1167===DNA-binding transcriptional regulator, MocR family, contains an aminotransferase domain	pfam00155===Aminotran_1_2
8025825459	Ga0609718_03_458124_459644	DNA-binding transcriptional MocR family regulator	8025822726	Paenibacillus sp. ClWae2A	1	458124	459644		8025822728	COG1167===DNA-binding transcriptional regulator, MocR family, contains an aminotransferase domain	pfam00155===Aminotran_1_2<<>>pfam00392===GntR
8025825809	Ga0609718_04_65426_66439	DNA-binding transcriptional MocR family regulator	8025822726	Paenibacillus sp. ClWae2A	1	65426	66439		8025822729	COG1167===DNA-binding transcriptional regulator, MocR family, contains an aminotransferase domain	pfam00392===GntR
8025826944	Ga0609718_07_154570_155145	DNA-binding transcriptional regulator GbsR (MarR family)	8025822726	Paenibacillus sp. ClWae2A	1	154570	155145		8025822732	COG1510===DNA-binding transcriptional regulator GbsR, MarR family
8025827530	Ga0609718_09_193018_193584	DNA-binding transcriptional regulator GbsR (MarR family)	8025822726	Paenibacillus sp. ClWae2A	1	193018	193584		8025822734	COG1510===DNA-binding transcriptional regulator GbsR, MarR family
8025825207	Ga0609718_03_193204_193971	DNA-binding transcriptional regulator GbsR (MarR family)	8025822726	Paenibacillus sp. ClWae2A	1	193204	193971		8025822728	COG1510===DNA-binding transcriptional regulator GbsR, MarR family
8025823488	Ga0609718_01_907116_907844	DNA-binding transcriptional regulator YhcF (GntR family)	8025822726	Paenibacillus sp. ClWae2A	1	907116	907844		8025822726	COG1725===DNA-binding transcriptional regulator YhcF, GntR family	pfam08461===HTH_12<<>>pfam07729===FCD
8025827359	Ga0609718_09_6359_7537	DNA-binding winged helix-turn-helix (wHTH) protein	8025822726	Paenibacillus sp. ClWae2A	1	6359	7537		8025822734	COG3710===DNA-binding winged helix-turn-helix (wHTH) domain	pfam00486===Trans_reg_C
8025829079	Ga0609718_23_47693_48004	DNA-binding YbaB/EbfC family protein	8025822726	Paenibacillus sp. ClWae2A	1	47693	48004		8025822748	COG0718===Conserved DNA-binding protein YbaB (function unknown)	pfam02575===YbaB_DNA_bd
8025824616	Ga0609718_02_712184_716266	DNA-directed DNA polymerase III PolC	8025822726	Paenibacillus sp. ClWae2A	1	712184	716266		8025822727	COG0587===DNA polymerase III, alpha subunit	pfam01336===tRNA_anti-codon<<>>pfam17657===DNA_pol3_finger<<>>pfam02811===PHP<<>>pfam07733===DNA_pol3_alpha<<>>pfam14579===HHH_6
8025828966	Ga0609718_22_11114_12058	DNA-directed RNA polymerase subunit alpha	8025822726	Paenibacillus sp. ClWae2A	1	11114	12058		8025822747	COG0202===DNA-directed RNA polymerase, alpha subunit/40 kD subunit	pfam01000===RNA_pol_A_bac<<>>pfam03118===RNA_pol_A_CTD<<>>pfam01193===RNA_pol_L
8025829002	Ga0609718_22_35203_38748	DNA-directed RNA polymerase subunit beta	8025822726	Paenibacillus sp. ClWae2A	1	35203	38748		8025822747	COG0085===DNA-directed RNA polymerase, beta subunit/140 kD subunit	pfam00562===RNA_pol_Rpb2_6<<>>pfam04563===RNA_pol_Rpb2_1<<>>pfam04560===RNA_pol_Rpb2_7<<>>pfam04561===RNA_pol_Rpb2_2<<>>pfam10385===RNA_pol_Rpb2_45<<>>pfam04565===RNA_pol_Rpb2_3
8025829001	Ga0609718_22_31475_35089	DNA-directed RNA polymerase subunit beta'	8025822726	Paenibacillus sp. ClWae2A	1	31475	35089		8025822747	COG0086===DNA-directed RNA polymerase, beta' subunit/160 kD subunit	pfam04983===RNA_pol_Rpb1_3<<>>pfam00623===RNA_pol_Rpb1_2<<>>pfam05000===RNA_pol_Rpb1_4<<>>pfam04997===RNA_pol_Rpb1_1<<>>pfam04998===RNA_pol_Rpb1_5
8025829069	Ga0609718_23_36094_36663	DNA-directed RNA polymerase subunit delta	8025822726	Paenibacillus sp. ClWae2A	1	36094	36663		8025822748	COG3343===DNA-directed RNA polymerase, delta subunit	pfam05066===HARE-HTH
8025827629	Ga0609718_10_74955_75392	DNA-directed RNA polymerase subunit M/transcription elongation factor TFIIS	8025822726	Paenibacillus sp. ClWae2A	1	74955	75392		8025822735	COG1594===DNA-directed RNA polymerase, subunit M/Transcription elongation factor TFIIS
8025825277	Ga0609718_03_272465_272677	DNA-directed RNA polymerase subunit omega	8025822726	Paenibacillus sp. ClWae2A	1	272465	272677		8025822728	COG1758===DNA-directed RNA polymerase, subunit K/omega	pfam01192===RNA_pol_Rpb6
8025827963	Ga0609718_12_86719_87750	DNA-directed RNA polymerase subunit RPC12/RpoP	8025822726	Paenibacillus sp. ClWae2A	1	86719	87750		8025822737	COG1996===DNA-directed RNA polymerase, subunit RPC12/RpoP, contains C4-type Zn-finger
8025824936	Ga0609718_02_1025005_1025469	DNA-directed RNA polymerase subunit RPC12/RpoP	8025822726	Paenibacillus sp. ClWae2A	1	1025005	1025469		8025822727	COG1996===DNA-directed RNA polymerase, subunit RPC12/RpoP, contains C4-type Zn-finger
8025827632	Ga0609718_10_77650_79515	DNA-directed RNA polymerase subunit RPC12/RpoP	8025822726	Paenibacillus sp. ClWae2A	1	77650	79515		8025822735	COG1996===DNA-directed RNA polymerase, subunit RPC12/RpoP, contains C4-type Zn-finger
8025826611	Ga0609718_06_122663_125467	DNA/RNA endonuclease YhcR with UshA esterase domain	8025822726	Paenibacillus sp. ClWae2A	1	122663	125467		8025822731	COG4085===DNA/RNA endonuclease YhcR, contains UshA esterase domain	pfam08329===ChitinaseA_N<<>>pfam18942===DUF5689
8025824715	Ga0609718_02_787888_788826	DnaD/phage-associated family protein	8025822726	Paenibacillus sp. ClWae2A	1	787888	788826		8025822727		pfam07261===DnaB_2
8025825597	Ga0609718_03_607352_607813	DnaJ-class molecular chaperone	8025822726	Paenibacillus sp. ClWae2A	1	607352	607813		8025822728	COG0484===DnaJ-class molecular chaperone with C-terminal Zn finger domain	pfam00226===DnaJ
8025824148	Ga0609718_02_193624_194190	DnaK suppressor protein	8025822726	Paenibacillus sp. ClWae2A	1	193624	194190		8025822727	COG1734===RNA polymerase-binding transcription factor DksA	pfam01258===zf-dskA_traR
8025825625	Ga0609718_03_637993_638937	drug/metabolite transporter (DMT)-like permease	8025822726	Paenibacillus sp. ClWae2A	1	637993	638937		8025822728	COG0697===Permease of the drug/metabolite transporter (DMT) superfamily	pfam00892===EamA
8025826848	Ga0609718_07_64793_65731	drug/metabolite transporter (DMT)-like permease	8025822726	Paenibacillus sp. ClWae2A	1	64793	65731		8025822732	COG0697===Permease of the drug/metabolite transporter (DMT) superfamily	pfam00892===EamA
8025825091	Ga0609718_03_74148_75077	drug/metabolite transporter (DMT)-like permease	8025822726	Paenibacillus sp. ClWae2A	1	74148	75077		8025822728	COG0697===Permease of the drug/metabolite transporter (DMT) superfamily	pfam00892===EamA
8025823701	Ga0609718_01_1136450_1137379	drug/metabolite transporter (DMT)-like permease	8025822726	Paenibacillus sp. ClWae2A	1	1136450	1137379		8025822726	COG0697===Permease of the drug/metabolite transporter (DMT) superfamily	pfam00892===EamA
8025823571	Ga0609718_01_1001127_1002107	drug/metabolite transporter (DMT)-like permease	8025822726	Paenibacillus sp. ClWae2A	1	1001127	1002107		8025822726	COG0697===Permease of the drug/metabolite transporter (DMT) superfamily	pfam00892===EamA
8025823057	Ga0609718_01_392805_393773	drug/metabolite transporter (DMT)-like permease	8025822726	Paenibacillus sp. ClWae2A	1	392805	393773		8025822726	COG0697===Permease of the drug/metabolite transporter (DMT) superfamily	pfam00892===EamA
8025824017	Ga0609718_02_85342_86289	drug/metabolite transporter (DMT)-like permease	8025822726	Paenibacillus sp. ClWae2A	1	85342	86289		8025822727	COG0697===Permease of the drug/metabolite transporter (DMT) superfamily	pfam00892===EamA
8025822800	Ga0609718_01_89604_90563	drug/metabolite transporter (DMT)-like permease	8025822726	Paenibacillus sp. ClWae2A	1	89604	90563		8025822726	COG0697===Permease of the drug/metabolite transporter (DMT) superfamily	pfam00892===EamA
8025828667	Ga0609718_17_63956_64891	drug/metabolite transporter (DMT)-like permease	8025822726	Paenibacillus sp. ClWae2A	1	63956	64891		8025822742	COG0697===Permease of the drug/metabolite transporter (DMT) superfamily	pfam00892===EamA
8025825393	Ga0609718_03_389076_389396	drug/metabolite transporter (DMT)-like permease	8025822726	Paenibacillus sp. ClWae2A	1	389076	389396		8025822728	COG0697===Permease of the drug/metabolite transporter (DMT) superfamily
8025827138	Ga0609718_08_39029_39931	drug/metabolite transporter (DMT)-like permease	8025822726	Paenibacillus sp. ClWae2A	1	39029	39931		8025822733	COG0697===Permease of the drug/metabolite transporter (DMT) superfamily	pfam00892===EamA
8025825394	Ga0609718_03_389383_389712	drug/metabolite transporter (DMT)-like permease	8025822726	Paenibacillus sp. ClWae2A	1	389383	389712		8025822728	COG0697===Permease of the drug/metabolite transporter (DMT) superfamily	pfam00892===EamA
8025828154	Ga0609718_13_105465_106352	drug/metabolite transporter superfamily protein YnfA	8025822726	Paenibacillus sp. ClWae2A	1	105465	106352		8025822738	COG1742===Uncharacterized inner membrane protein YnfA, drug/metabolite transporter superfamily
8025826161	Ga0609718_04_468739_469287	dTDP-4-dehydrorhamnose 3,5-epimerase	8025822726	Paenibacillus sp. ClWae2A	1	468739	469287		8025822729	COG1898===dTDP-4-dehydrorhamnose 3,5-epimerase or related enzyme	pfam00908===dTDP_sugar_isom
8025826163	Ga0609718_04_470364_471245	dTDP-4-dehydrorhamnose reductase	8025822726	Paenibacillus sp. ClWae2A	1	470364	471245		8025822729	COG1091===dTDP-4-dehydrorhamnose reductase	pfam04321===RmlD_sub_bind
8025826280	Ga0609718_05_124152_124979	dTDP-4-dehydrorhamnose reductase	8025822726	Paenibacillus sp. ClWae2A	1	124152	124979		8025822730	COG1091===dTDP-4-dehydrorhamnose reductase	pfam04321===RmlD_sub_bind
8025826162	Ga0609718_04_469342_470367	dTDP-glucose 4,6-dehydratase	8025822726	Paenibacillus sp. ClWae2A	1	469342	470367		8025822729	COG1088===dTDP-D-glucose 4,6-dehydratase	pfam16363===GDP_Man_Dehyd
8025827428	Ga0609718_09_80948_81949	dTDP-glucose 4,6-dehydratase	8025822726	Paenibacillus sp. ClWae2A	1	80948	81949		8025822734	COG0451===Nucleoside-diphosphate-sugar epimerase	pfam01370===Epimerase
8025828835	Ga0609718_20_6535_7182	dTMP kinase	8025822726	Paenibacillus sp. ClWae2A	1	6535	7182		8025822745	COG0125===Thymidylate kinase	pfam02223===Thymidylate_kin
8025826714	Ga0609718_06_238256_240577	DUF1680 family protein	8025822726	Paenibacillus sp. ClWae2A	1	238256	240577		8025822731	COG3533===Uncharacterized conserved protein, DUF1680 family	pfam07944===Glyco_hydro_127<<>>pfam16375===DUF4986
8025823771	Ga0609718_01_1230445_1232421	DUF1680 family protein	8025822726	Paenibacillus sp. ClWae2A	1	1230445	1232421		8025822726	COG3533===Uncharacterized conserved protein, DUF1680 family	pfam07944===Glyco_hydro_127
8025826664	Ga0609718_06_175289_177148	DUF2075 family protein	8025822726	Paenibacillus sp. ClWae2A	1	175289	177148		8025822731	COG3410===Uncharacterized protein, DUF2075 family	pfam09848===DUF2075
8025825848	Ga0609718_04_106478_107377	DUF4097 and DUF4098 domain-containing protein YvlB	8025822726	Paenibacillus sp. ClWae2A	1	106478	107377		8025822729	COG3595===Uncharacterized conserved protein YvlB, contains DUF4097 and DUF4098 domains	pfam13349===DUF4097
8025828823	Ga0609718_19_67345_68754	DUF4097 and DUF4098 domain-containing protein YvlB	8025822726	Paenibacillus sp. ClWae2A	1	67345	68754		8025822744	COG3595===Uncharacterized conserved protein YvlB, contains DUF4097 and DUF4098 domains	pfam13349===DUF4097
8025824226	Ga0609718_02_275531_275974	dUTP pyrophosphatase	8025822726	Paenibacillus sp. ClWae2A	1	275531	275974		8025822727	COG0756===dUTPase	pfam00692===dUTPase
8025828230	Ga0609718_14_10167_11225	EAL domain-containing protein (putative c-di-GMP-specific phosphodiesterase class I)	8025822726	Paenibacillus sp. ClWae2A	1	10167	11225		8025822739	COG2200===EAL domain, c-di-GMP-specific phosphodiesterase class I (or its enzymatically inactive variant)	pfam00563===EAL
8025828997	Ga0609718_22_27759_29837	elongation factor G	8025822726	Paenibacillus sp. ClWae2A	1	27759	29837		8025822747	COG0480===Translation elongation factor EF-G, a GTPase	pfam03144===GTP_EFTU_D2<<>>pfam03764===EFG_IV<<>>pfam00009===GTP_EFTU<<>>pfam14492===EFG_III<<>>pfam00679===EFG_C
8025825149	Ga0609718_03_128399_128956	elongation factor P	8025822726	Paenibacillus sp. ClWae2A	1	128399	128956		8025822728	COG0231===Translation elongation factor P (EF-P)/translation initiation factor 5A (eIF-5A)	pfam01132===EFP<<>>pfam08207===EFP_N<<>>pfam09285===Elong-fact-P_C
8025824249	Ga0609718_02_301758_302408	elongation factor Ts	8025822726	Paenibacillus sp. ClWae2A	1	301758	302408		8025822727	COG0264===Translation elongation factor EF-Ts	pfam00889===EF_TS
8025828996	Ga0609718_22_26473_27663	elongation factor Tu	8025822726	Paenibacillus sp. ClWae2A	1	26473	27663		8025822747	COG0050===Translation elongation factor EF-Tu, a GTPase	pfam00009===GTP_EFTU<<>>pfam03144===GTP_EFTU_D2<<>>pfam03143===GTP_EFTU_D3
8025829206	Ga0609718_26_24066_25589	EmrB/QacA subfamily drug resistance transporter	8025822726	Paenibacillus sp. ClWae2A	1	24066	25589		8025822751	COG0477===MFS family permease	pfam07690===MFS_1
8025826272	Ga0609718_05_116770_118299	EmrB/QacA subfamily drug resistance transporter	8025822726	Paenibacillus sp. ClWae2A	1	116770	118299		8025822730	COG0477===MFS family permease	pfam07690===MFS_1
8025823141	Ga0609718_01_498308_499702	EmrB/QacA subfamily drug resistance transporter	8025822726	Paenibacillus sp. ClWae2A	1	498308	499702		8025822726	COG0477===MFS family permease	pfam07690===MFS_1
8025823808	Ga0609718_01_1271275_1272786	EmrB/QacA subfamily drug resistance transporter	8025822726	Paenibacillus sp. ClWae2A	1	1271275	1272786		8025822726	COG0477===MFS family permease	pfam07690===MFS_1
8025822938	Ga0609718_01_266105_267604	EmrB/QacA subfamily drug resistance transporter	8025822726	Paenibacillus sp. ClWae2A	1	266105	267604		8025822726	COG0477===MFS family permease	pfam07690===MFS_1
8025827778	Ga0609718_11_45069_46658	EmrB/QacA subfamily drug resistance transporter	8025822726	Paenibacillus sp. ClWae2A	1	45069	46658		8025822736	COG0477===MFS family permease	pfam07690===MFS_1
8025826137	Ga0609718_04_432004_433560	EmrB/QacA subfamily drug resistance transporter	8025822726	Paenibacillus sp. ClWae2A	1	432004	433560		8025822729	COG0477===MFS family permease	pfam07690===MFS_1
8025828089	Ga0609718_13_33966_34367	enamine deaminase RidA (YjgF/YER057c/UK114 family)	8025822726	Paenibacillus sp. ClWae2A	1	33966	34367		8025822738	COG0251===Enamine deaminase RidA, house cleaning of reactive enamine intermediates, YjgF/YER057c/UK114 family	pfam01042===Ribonuc_L-PSP
8025823717	Ga0609718_01_1172785_1173183	enamine deaminase RidA (YjgF/YER057c/UK114 family)	8025822726	Paenibacillus sp. ClWae2A	1	1172785	1173183		8025822726	COG0251===Enamine deaminase RidA, house cleaning of reactive enamine intermediates, YjgF/YER057c/UK114 family	pfam01042===Ribonuc_L-PSP
8025823979	Ga0609718_02_42700_43146	enamine deaminase RidA (YjgF/YER057c/UK114 family)	8025822726	Paenibacillus sp. ClWae2A	1	42700	43146		8025822727	COG0251===Enamine deaminase RidA, house cleaning of reactive enamine intermediates, YjgF/YER057c/UK114 family	pfam14588===YjgF_endoribonc
8025825628	Ga0609718_03_641214_646190	endo-1,3(4)-beta-glucanase	8025822726	Paenibacillus sp. ClWae2A	1	641214	646190		8025822728	COG5498===Endoglucanase Acf2<<>>COG4266===Allantoicase	pfam00754===F5_F8_type_C<<>>pfam17652===Glyco_hydro81C
8025823218	Ga0609718_01_585669_586382	endo-1,3-1,4-beta-glycanase ExoK	8025822726	Paenibacillus sp. ClWae2A	1	585669	586382		8025822726	COG2273===Beta-glucanase, GH16 family	pfam00722===Glyco_hydro_16
8025827267	Ga0609718_08_179788_180789	endo-1,4-beta-xylanase	8025822726	Paenibacillus sp. ClWae2A	1	179788	180789		8025822733	COG3693===Endo-1,4-beta-xylanase, GH35 family	pfam00331===Glyco_hydro_10
8025823315	Ga0609718_01_726164_728836	endo-1,4-beta-xylanase	8025822726	Paenibacillus sp. ClWae2A	1	726164	728836		8025822726	COG3693===Endo-1,4-beta-xylanase, GH35 family	pfam00331===Glyco_hydro_10<<>>pfam06452===CBM9_1<<>>pfam02018===CBM_4_9
8025824804	Ga0609718_02_877149_879971	endo-1,4-beta-xylanase	8025822726	Paenibacillus sp. ClWae2A	1	877149	879971		8025822727	COG3693===Endo-1,4-beta-xylanase, GH35 family	pfam02018===CBM_4_9<<>>pfam00331===Glyco_hydro_10<<>>pfam06452===CBM9_1
8025827558	Ga0609718_09_222576_223538	endo-1,4-beta-xylanase	8025822726	Paenibacillus sp. ClWae2A	1	222576	223538		8025822734	COG3693===Endo-1,4-beta-xylanase, GH35 family	pfam00331===Glyco_hydro_10
8025824036	Ga0609718_02_103666_105999	endo-1,4-beta-xylanase	8025822726	Paenibacillus sp. ClWae2A	1	103666	105999		8025822727	COG3693===Endo-1,4-beta-xylanase, GH35 family	pfam02018===CBM_4_9<<>>pfam00942===CBM_3<<>>pfam00041===fn3<<>>pfam00331===Glyco_hydro_10
8025823113	Ga0609718_01_462786_463421	endo-1,4-beta-xylanase	8025822726	Paenibacillus sp. ClWae2A	1	462786	463421		8025822726		pfam00457===Glyco_hydro_11
8025826360	Ga0609718_05_224733_227501	endo-beta-N-acetylglucosaminidase D	8025822726	Paenibacillus sp. ClWae2A	1	224733	227501		8025822730	COG4724===Endo-beta-N-acetylglucosaminidase D	pfam03644===Glyco_hydro_85
8025827287	Ga0609718_08_206488_209145	endo-beta-N-acetylglucosaminidase D/PKD repeat protein	8025822726	Paenibacillus sp. ClWae2A	1	206488	209145		8025822733	COG4724===Endo-beta-N-acetylglucosaminidase D<<>>COG3291===PKD repeat	pfam00754===F5_F8_type_C<<>>pfam18911===PKD_4<<>>pfam03644===Glyco_hydro_85
8025826060	Ga0609718_04_361265_361369	endogenous inhibitor of DNA gyrase (YacG/DUF329 family)	8025822726	Paenibacillus sp. ClWae2A	1	361265	361369		8025822729	COG3024===Endogenous inhibitor of DNA gyrase, YacG/DUF329 family
8025822815	Ga0609718_01_119435_121159	endoglucanase	8025822726	Paenibacillus sp. ClWae2A	1	119435	121159		8025822726	COG2730===Aryl-phospho-beta-D-glucosidase BglC, GH1 family	pfam00150===Cellulase<<>>pfam03442===CBM_X2<<>>pfam18448===CBM46
8025823100	Ga0609718_01_443645_445348	endoglucanase	8025822726	Paenibacillus sp. ClWae2A	1	443645	445348		8025822726		pfam14200===RicinB_lectin_2<<>>pfam00150===Cellulase
8025824049	Ga0609718_02_120173_121360	endoglucanase	8025822726	Paenibacillus sp. ClWae2A	1	120173	121360		8025822727	COG2730===Aryl-phospho-beta-D-glucosidase BglC, GH1 family	pfam00150===Cellulase
8025823878	Ga0609718_01_1353572_1355317	endoglucanase	8025822726	Paenibacillus sp. ClWae2A	1	1353572	1355317		8025822726	COG2730===Aryl-phospho-beta-D-glucosidase BglC, GH1 family	pfam03442===CBM_X2<<>>pfam18448===CBM46<<>>pfam00150===Cellulase
8025828922	Ga0609718_21_31571_34570	endoglucanase	8025822726	Paenibacillus sp. ClWae2A	1	31571	34570		8025822746		pfam00759===Glyco_hydro_9<<>>pfam00942===CBM_3
8025823826	Ga0609718_01_1297131_1297826	endonuclease-3	8025822726	Paenibacillus sp. ClWae2A	1	1297131	1297826		8025822726	COG0177===Endonuclease III	pfam00730===HhH-GPD<<>>pfam10576===EndIII_4Fe-2S
8025824746	Ga0609718_02_808136_809485	endonuclease/exonuclease/phosphatase family metal-dependent hydrolase	8025822726	Paenibacillus sp. ClWae2A	1	808136	809485		8025822727	COG3568===Metal-dependent hydrolase, endonuclease/exonuclease/phosphatase family	pfam01419===Jacalin
8025822822	Ga0609718_01_130235_131089	energy-coupling factor transport system ATP-binding protein	8025822726	Paenibacillus sp. ClWae2A	1	130235	131089		8025822726	COG1122===Energy-coupling factor transporter ATP-binding protein EcfA2	pfam00005===ABC_tran
8025826764	Ga0609718_06_306405_307199	energy-coupling factor transport system permease protein	8025822726	Paenibacillus sp. ClWae2A	1	306405	307199		8025822731	COG0619===Energy-coupling factor transporter transmembrane protein EcfT	pfam02361===CbiQ
8025826766	Ga0609718_06_308746_309549	energy-coupling factor transport system substrate-specific component	8025822726	Paenibacillus sp. ClWae2A	1	308746	309549		8025822731	COG4721===ABC-type thiamine/hydroxymethylpyrimidine transport system, permease component	pfam09819===ABC_cobalt
8025826765	Ga0609718_06_307174_308745	energy-coupling factor transporter ATP-binding protein EcfA2	8025822726	Paenibacillus sp. ClWae2A	1	307174	308745		8025822731	COG1122===Energy-coupling factor transporter ATP-binding protein EcfA2	pfam00005===ABC_tran
8025828495	Ga0609718_16_808_1689	energy-coupling factor transporter ATP-binding protein EcfA2	8025822726	Paenibacillus sp. ClWae2A	1	808	1689		8025822741	COG1122===Energy-coupling factor transporter ATP-binding protein EcfA2
8025822823	Ga0609718_01_131074_132837	energy-coupling factor transporter ATP-binding protein EcfA2/energy-coupling factor transporter transmembrane protein EcfT	8025822726	Paenibacillus sp. ClWae2A	1	131074	132837		8025822726	COG0619===Energy-coupling factor transporter transmembrane protein EcfT<<>>COG1122===Energy-coupling factor transporter ATP-binding protein EcfA2	pfam00005===ABC_tran<<>>pfam02361===CbiQ
8025828002	Ga0609718_12_138231_139517	enolase	8025822726	Paenibacillus sp. ClWae2A	1	138231	139517		8025822737	COG0148===Enolase	pfam00113===Enolase_C<<>>pfam03952===Enolase_N
8025827225	Ga0609718_08_141262_142455	enoyl-[acyl-carrier protein] reductase/trans-2-enoyl-CoA reductase (NAD+)	8025822726	Paenibacillus sp. ClWae2A	1	141262	142455		8025822733	COG3007===Trans-2-enoyl-CoA reductase	pfam12242===Eno-Rase_NADH_b<<>>pfam12241===Enoyl_reductase<<>>pfam07055===Eno-Rase_FAD_bd
8025823616	Ga0609718_01_1051740_1052474	enterochelin esterase-like enzyme	8025822726	Paenibacillus sp. ClWae2A	1	1051740	1052474		8025822726	COG2382===Enterochelin esterase or related enzyme	pfam00756===Esterase
8025826700	Ga0609718_06_219676_221055	enterochelin esterase-like enzyme	8025822726	Paenibacillus sp. ClWae2A	1	219676	221055		8025822731	COG2382===Enterochelin esterase or related enzyme	pfam00756===Esterase
8025825617	Ga0609718_03_628938_629885	enterochelin esterase-like enzyme	8025822726	Paenibacillus sp. ClWae2A	1	628938	629885		8025822728	COG2382===Enterochelin esterase or related enzyme	pfam00756===Esterase
8025823112	Ga0609718_01_461941_462714	enterochelin esterase-like enzyme	8025822726	Paenibacillus sp. ClWae2A	1	461941	462714		8025822726	COG2382===Enterochelin esterase or related enzyme	pfam00756===Esterase
8025828623	Ga0609718_17_19474_21354	epoxyqueuosine reductase	8025822726	Paenibacillus sp. ClWae2A	1	19474	21354		8025822742	COG0350===O6-methylguanine-DNA--protein-cysteine methyltransferase<<>>COG1600===Epoxyqueuosine reductase QueG (queuosine biosynthesis)	pfam01035===DNA_binding_1<<>>pfam08331===DUF1730<<>>pfam13484===Fer4_16<<>>pfam02870===Methyltransf_1N<<>>pfam13646===HEAT_2
8025826154	Ga0609718_04_453865_456723	excinuclease ABC subunit A	8025822726	Paenibacillus sp. ClWae2A	1	453865	456723		8025822729	COG0178===Excinuclease UvrABC ATPase subunit	pfam00005===ABC_tran<<>>pfam17755===UvrA_DNA-bind<<>>pfam17760===UvrA_inter
8025826152	Ga0609718_04_450872_452863	excinuclease ABC subunit B	8025822726	Paenibacillus sp. ClWae2A	1	450872	452863		8025822729	COG0556===Excinuclease UvrABC helicase subunit UvrB	pfam17757===UvrB_inter<<>>pfam12344===UvrB<<>>pfam00271===Helicase_C<<>>pfam02151===UVR<<>>pfam04851===ResIII
8025826346	Ga0609718_05_199384_201471	excinuclease ABC subunit C	8025822726	Paenibacillus sp. ClWae2A	1	199384	201471		8025822730	COG0322===Excinuclease UvrABC, nuclease subunit	pfam01541===GIY-YIG<<>>pfam02151===UVR<<>>pfam14520===HHH_5<<>>pfam08459===UvrC_HhH_N
8025825131	Ga0609718_03_113470_114834	exodeoxyribonuclease VII large subunit	8025822726	Paenibacillus sp. ClWae2A	1	113470	114834		8025822728	COG1570===Exonuclease VII, large subunit	pfam13742===tRNA_anti_2<<>>pfam02601===Exonuc_VII_L
8025825130	Ga0609718_03_113223_113480	exodeoxyribonuclease VII small subunit	8025822726	Paenibacillus sp. ClWae2A	1	113223	113480		8025822728	COG1722===Exonuclease VII small subunit	pfam02609===Exonuc_VII_S
8025825734	Ga0609718_03_768157_768912	exodeoxyribonuclease-3	8025822726	Paenibacillus sp. ClWae2A	1	768157	768912		8025822728	COG0708===Exonuclease III	pfam03372===Exo_endo_phos
8025825489	Ga0609718_03_487910_491329	exonuclease SbcC	8025822726	Paenibacillus sp. ClWae2A	1	487910	491329		8025822728	COG0419===DNA repair exonuclease SbcCD ATPase subunit	pfam13476===AAA_23<<>>pfam13558===SbcCD_C
8025825490	Ga0609718_03_491326_492510	exonuclease SbcD	8025822726	Paenibacillus sp. ClWae2A	1	491326	492510		8025822728	COG0420===DNA repair exonuclease SbcCD nuclease subunit	pfam00149===Metallophos<<>>pfam12320===SbcD_C
8025826380	Ga0609718_05_245689_247218	exopolyphosphatase/guanosine-5'-triphosphate,3'-diphosphate pyrophosphatase	8025822726	Paenibacillus sp. ClWae2A	1	245689	247218		8025822730	COG0248===Exopolyphosphatase/pppGpp-phosphohydrolase	pfam02541===Ppx-GppA
[truncated: 4,861 more rows]
