# Supplementary material for: Phenotypic and Draft Genome Sequence Analyses of a Paenibacillus sp. Isolated from the Gastrointestinal Tract of a North American Gray Wolf (Canis lupus)
Source: MDPI journal article supplement (doi:10.3390/applmicrobiol3040077), 2023-09-23
Supplement: s1 [file s1 › TableS2_Functional_genes_categories_table.xlsx]

## Sheet: Probiotic "Keyword" search
Gene category	Search terms	Number of hits	Total number of genes	Percentage of genes
Antimicrobials	"bacteriocin"	5	6543	0.000764175
Antimicrobials	"lantibiotic"	6	6543	0.000917011
Antimicrobials	"chitinase"	2	6543	0.00030567
Antimicrobials	"lysin"	22	6543	0.00336237
Antimicrobials	"amidase"	42	6543	0.00641907				Gene category	Search terms	Number of hits	Total number of genes	Percentage of genes
Antimicrobials	Total	77	6543	0.0117683				Antimicrobials	Total	77	6543	0.0118
Phage-derived	"phage"	40	6543	0.0061134				Phage-derived	Total	48	6543	0.0073
Phage-derived	"terminase"	4	6543	0.00061134				Spore formation genes	Total	99	6543	0.0151
Phage-derived	"tail"	4	6543	0.00061134				Metabolic	Total	162	6543	0.0248
Phage-derived	Total	48	6543	0.00733608				Germination	Total	34	6543	0.00519639
Spore formation genes	"spore"	14	6543	0.00213969				Antitoxin	Total	12	6543	0.00183402
Spore formation genes	"sporulation"	85	6543	0.012991
Spore formation genes	"endospore"	0	6543	0
Spore formation genes	Total	99	6543	0.0151307
Metabolic	"lactate"	13	6543	0.00198686
Metabolic	"lactic"	0	6543	0
Metabolic	"cytochrome c"	69	6543	0.0105456
Metabolic	"catalase"	6	6543	0.000917011
Metabolic	"oxidase"	74	6543	0.0113098
Metabolic	Total	162	6543	0.0247593
Germination	Total	34	6543	0.00519639
Antitoxin	Total	12	6543	0.00183402

## Sheet: Functional Gene Table
COG	Description	Cog Category Code
COG0001	Glutamate-1-semialdehyde aminotransferase	H
COG0001	Glutamate-1-semialdehyde aminotransferase	H
COG0001	Glutamate-1-semialdehyde aminotransferase	H
COG0002	N-acetyl-gamma-glutamylphosphate reductase	E
COG0004	Ammonia channel protein AmtB	P
COG0004	Ammonia channel protein AmtB	P
COG0005	Purine nucleoside phosphorylase	F
COG0005	Purine nucleoside phosphorylase	F
COG0005	Purine nucleoside phosphorylase	F
COG0006	Xaa-Pro aminopeptidase	E
COG0006	Xaa-Pro aminopeptidase	E
COG0006	Xaa-Pro aminopeptidase	E
COG0007	Uroporphyrinogen-III methylase (siroheme synthase)	H
COG0007	Uroporphyrinogen-III methylase (siroheme synthase)<<>>COG1587	H
COG0008	Glutamyl- or glutaminyl-tRNA synthetase	J
COG0008	Glutamyl- or glutaminyl-tRNA synthetase	J
COG0009	tRNA A37 threonylcarbamoyladenosine synthetase subunit TsaC/SUA5/YrdC	J
COG0010	Arginase family enzyme	E
COG0010	Arginase family enzyme	E
COG0010	Arginase family enzyme	E
COG0010	Arginase family enzyme	E
COG0011	Uncharacterized conserved protein YqgV, UPF0045/DUF77 family	H
COG0011	Uncharacterized conserved protein YqgV, UPF0045/DUF77 family	H
COG0012	Ribosome-binding ATPase YchF, GTP1/OBG family	J
COG0013	Alanyl-tRNA synthetase	J
COG0014	Gamma-glutamyl phosphate reductase	E
COG0015	Adenylosuccinate lyase	F
COG0016	Phenylalanyl-tRNA synthetase alpha subunit	J
COG0017	Aspartyl/asparaginyl-tRNA synthetase	J
COG0018	Arginyl-tRNA synthetase	J
COG0018	Arginyl-tRNA synthetase	J
COG0019	Diaminopimelate decarboxylase	E
COG0019	Diaminopimelate decarboxylase	E
COG0019	Diaminopimelate decarboxylase	E
COG0019	Diaminopimelate decarboxylase	E
COG0020	Undecaprenyl pyrophosphate synthase	I
COG0021	Transketolase	G
COG0022	Pyruvate/2-oxoglutarate/acetoin dehydrogenase complex, dehydrogenase (E1) component	C
COG0022	Pyruvate/2-oxoglutarate/acetoin dehydrogenase complex, dehydrogenase (E1) component	C
COG0024	Methionine aminopeptidase	J
COG0024	Methionine aminopeptidase	J
COG0024	Methionine aminopeptidase	J
COG0024	Methionine aminopeptidase	J
COG0025	NhaP-type Na+/H+ or K+/H+ antiporter	P
COG0026	Phosphoribosylaminoimidazole carboxylase (NCAIR synthetase)	F
COG0026	Phosphoribosylaminoimidazole carboxylase (NCAIR synthetase)	F
COG0027	Formate-dependent phosphoribosylglycinamide formyltransferase (GAR transformylase)	F
COG0028	Acetolactate synthase large subunit or other thiamine pyrophosphate-requiring enzyme	E H
COG0028	Acetolactate synthase large subunit or other thiamine pyrophosphate-requiring enzyme	E H
COG0028	Acetolactate synthase large subunit or other thiamine pyrophosphate-requiring enzyme	E H
COG0029	Aspartate oxidase	H
COG0030	16S rRNA A1518 and A1519 N6-dimethyltransferase RsmA/KsgA/DIM1 (may also have DNA glycosylase/AP lyase activity)	J
COG0031	Cysteine synthase	E
COG0031	Cysteine synthase	E
COG0031	Cysteine synthase	E
COG0034	Glutamine phosphoribosylpyrophosphate amidotransferase	F
COG0035	Uracil phosphoribosyltransferase	F
COG0036	Pentose-5-phosphate-3-epimerase	G
COG0037	tRNA(Ile)-lysidine synthase TilS/MesJ	J
COG0039	Malate/lactate dehydrogenase	C
COG0039	Malate/lactate dehydrogenase	C
COG0039	Malate/lactate dehydrogenase	C
COG0040	ATP phosphoribosyltransferase	E
COG0041	Phosphoribosylcarboxyaminoimidazole (NCAIR) mutase	F
COG0042	tRNA-dihydrouridine synthase	J
COG0042	tRNA-dihydrouridine synthase	J
COG0043	3-polyprenyl-4-hydroxybenzoate decarboxylase	H
COG0044	Dihydroorotase or related cyclic amidohydrolase	F
COG0044	Dihydroorotase or related cyclic amidohydrolase	F
COG0044	Dihydroorotase or related cyclic amidohydrolase	F
COG0045	Succinyl-CoA synthetase, beta subunit	C
COG0046	Phosphoribosylformylglycinamidine (FGAM) synthase, synthetase domain	F
COG0047	Phosphoribosylformylglycinamidine (FGAM) synthase, glutamine amidotransferase domain	F
COG0048	Ribosomal protein S12	J
COG0049	Ribosomal protein S7	J
COG0050	Translation elongation factor EF-Tu, a GTPase	J
COG0051	Ribosomal protein S10	J
COG0052	Ribosomal protein S2	J
COG0053	Divalent metal cation (Fe/Co/Zn/Cd) transporter	P
COG0053	Divalent metal cation (Fe/Co/Zn/Cd) transporter	P
COG0053	Divalent metal cation (Fe/Co/Zn/Cd) transporter	P
COG0053	Divalent metal cation (Fe/Co/Zn/Cd) transporter	P
COG0054	6,7-dimethyl-8-ribityllumazine synthase (Riboflavin synthase beta chain)	H
COG0055	FoF1-type ATP synthase, beta subunit	C
COG0056	FoF1-type ATP synthase, alpha subunit	C
COG0057	Glyceraldehyde-3-phosphate dehydrogenase/erythrose-4-phosphate dehydrogenase	G
COG0057	Glyceraldehyde-3-phosphate dehydrogenase/erythrose-4-phosphate dehydrogenase	G
COG0058	Glucan phosphorylase	G
COG0059	Ketol-acid reductoisomerase	E H
COG0060	Isoleucyl-tRNA synthetase	J
COG0061	NAD kinase	H
COG0061	NAD kinase	H
COG0062	NAD(P)H-hydrate repair enzyme Nnr, NAD(P)H-hydrate epimerase domain	F
COG0063	NAD(P)H-hydrate repair enzyme Nnr, NAD(P)H-hydrate dehydratase domain	F
COG0064	Asp-tRNAAsn/Glu-tRNAGln amidotransferase B subunit	J
COG0065	Homoaconitase/3-isopropylmalate dehydratase large subunit	E
COG0066	3-isopropylmalate dehydratase small subunit	E
COG0069	Glutamate synthase domain 2<<>>COG0067	E
COG0071	Molecular chaperone IbpA, HSP20 family	O
COG0072	Phenylalanyl-tRNA synthetase beta subunit	J
COG0073	tRNA-binding EMAP/Myf domain	J
COG0074	Succinyl-CoA synthetase, alpha subunit	C
COG0075	Archaeal aspartate aminotransferase or a related aminotransferase, includes purine catabolism protein PucG	E F
COG0077	Prephenate dehydratase	E
COG0077	Prephenate dehydratase	E
COG0078	Ornithine carbamoyltransferase	E
COG0079	Histidinol-phosphate/aromatic aminotransferase or cobyric acid decarboxylase	E
COG0079	Histidinol-phosphate/aromatic aminotransferase or cobyric acid decarboxylase	E
COG0080	Ribosomal protein L11	J
COG0081	Ribosomal protein L1	J
COG0082	Chorismate synthase	E
COG0083	Homoserine kinase	E
COG0084	Tat protein secretion system quality control protein TatD (DNase activity)	N
COG0084	Tat protein secretion system quality control protein TatD (DNase activity)	N
COG0085	DNA-directed RNA polymerase, beta subunit/140 kD subunit	K
COG0086	DNA-directed RNA polymerase, beta' subunit/160 kD subunit	K
COG0087	Ribosomal protein L3	J
COG0088	Ribosomal protein L4	J
COG0089	Ribosomal protein L23	J
COG0090	Ribosomal protein L2	J
COG0091	Ribosomal protein L22	J
COG0092	Ribosomal protein S3	J
COG0093	Ribosomal protein L14	J
COG0094	Ribosomal protein L5	J
COG0095	Lipoate-protein ligase A	H
COG0095	Lipoate-protein ligase A	H
COG0096	Ribosomal protein S8	J
COG0097	Ribosomal protein L6P/L9E	J
COG0098	Ribosomal protein S5	J
COG0099	Ribosomal protein S13	J
COG0099	Ribosomal protein S13	J
COG0100	Ribosomal protein S11	J
COG0101	tRNA U38,U39,U40 pseudouridine synthase TruA	J
COG0102	Ribosomal protein L13	J
COG0103	Ribosomal protein S9	J
COG0104	Adenylosuccinate synthase	F
COG0105	Nucleoside diphosphate kinase	F
COG0106	Phosphoribosylformimino-5-aminoimidazole carboxamide ribonucleotide (ProFAR) isomerase	E
COG0107	Imidazole glycerol phosphate synthase subunit HisF	E
COG0109	Polyprenyltransferase (heme O synthase)	H I
COG0109	Polyprenyltransferase (heme O synthase)	H I
COG0110	Acetyltransferase (isoleucine patch superfamily)	R
COG0110	Acetyltransferase (isoleucine patch superfamily)	R
COG0110	Acetyltransferase (isoleucine patch superfamily)	R
COG0110	Acetyltransferase (isoleucine patch superfamily)	R
COG0110	Acetyltransferase (isoleucine patch superfamily)	R
COG0111	Phosphoglycerate dehydrogenase or related dehydrogenase	H
COG0111	Phosphoglycerate dehydrogenase or related dehydrogenase	H
COG0111	Phosphoglycerate dehydrogenase or related dehydrogenase<<>>COG3830	H
COG0111	Phosphoglycerate dehydrogenase or related dehydrogenase	H
COG0111	Phosphoglycerate dehydrogenase or related dehydrogenase	H
COG0112	Glycine/serine hydroxymethyltransferase	E
COG0112	Glycine/serine hydroxymethyltransferase	E
COG0113	Delta-aminolevulinic acid dehydratase, porphobilinogen synthase	H
COG0114	Fumarate hydratase class II	C
COG0115	Branched-chain amino acid aminotransferase/4-amino-4-deoxychorismate lyase	E H
COG0115	Branched-chain amino acid aminotransferase/4-amino-4-deoxychorismate lyase	E H
COG0116	23S rRNA G2445 N2-methylase RlmL	J
COG0117	Pyrimidine deaminase domain of riboflavin biosynthesis protein RibD<<>>COG1985	H
COG0118	Imidazoleglycerol phosphate synthase glutamine amidotransferase subunit HisH	E
COG0119	Isopropylmalate/homocitrate/citramalate synthases	E
COG0119	Isopropylmalate/homocitrate/citramalate synthases	E
COG0119	Isopropylmalate/homocitrate/citramalate synthases	E
COG0119	Isopropylmalate/homocitrate/citramalate synthases	E
COG0120	Ribose 5-phosphate isomerase	G
COG0124	Histidyl-tRNA synthetase	J
COG0125	Thymidylate kinase	F
COG0125	Thymidylate kinase	F
COG0126	3-phosphoglycerate kinase	G
COG0127	Inosine/xanthosine triphosphate pyrophosphatase, all-alpha NTP-PPase family	F
COG0128	5-enolpyruvylshikimate-3-phosphate synthase	E
COG0129	Dihydroxyacid dehydratase/phosphogluconate dehydratase	G E
COG0129	Dihydroxyacid dehydratase/phosphogluconate dehydratase	G E
COG0130	tRNA U55 pseudouridine synthase TruB, may also work on U342 of tmRNA	J
COG0131	Imidazoleglycerol phosphate dehydratase HisB	E
COG0133	Tryptophan synthase beta chain	E
COG0134	Indole-3-glycerol phosphate synthase	E
COG0135	Phosphoribosylanthranilate isomerase	E
COG0136	Aspartate-semialdehyde dehydrogenase	E
COG0137	Argininosuccinate synthase	E
COG0138	AICAR transformylase/IMP cyclohydrolase PurH	F
COG0140	Phosphoribosyl-ATP pyrophosphohydrolase<<>>COG0139	E
COG0141	Histidinol dehydrogenase	E
COG0142	Geranylgeranyl pyrophosphate synthase	H
COG0142	Geranylgeranyl pyrophosphate synthase	H
COG0142	Geranylgeranyl pyrophosphate synthase	H
COG0143	Methionyl-tRNA synthetase<<>>COG0073	J
COG0144	16S rRNA C967 or C1407 C5-methylase, RsmB/RsmF family	J
COG0145	N-methylhydantoinase A/oxoprolinase/acetone carboxylase, beta subunit	E Q
COG0146	N-methylhydantoinase B/oxoprolinase/acetone carboxylase, alpha subunit	E Q
COG0147	Anthranilate/para-aminobenzoate synthases component I	E H
COG0147	Anthranilate/para-aminobenzoate synthases component I	E H
COG0148	Enolase	G
COG0149	Triosephosphate isomerase	G
COG0150	Phosphoribosylaminoimidazole (AIR) synthetase	F
COG0151	Phosphoribosylamine-glycine ligase	F
COG0152	Phosphoribosylaminoimidazole-succinocarboxamide synthase	F
COG0153	Galactokinase	G
COG0153	Galactokinase	G
COG0154	Asp-tRNAAsn/Glu-tRNAGln amidotransferase A subunit or related amidase	J
COG0154	Asp-tRNAAsn/Glu-tRNAGln amidotransferase A subunit or related amidase	J
COG0154	Asp-tRNAAsn/Glu-tRNAGln amidotransferase A subunit or related amidase	J
COG0154	Asp-tRNAAsn/Glu-tRNAGln amidotransferase A subunit or related amidase	J
COG0155	Sulfite reductase, beta subunit (hemoprotein)	P
COG0156	7-keto-8-aminopelargonate synthetase or related enzyme	H
COG0157	Nicotinate-nucleotide pyrophosphorylase	H
COG0159	Tryptophan synthase alpha chain	E
COG0160	4-aminobutyrate aminotransferase or related aminotransferase	E
COG0160	4-aminobutyrate aminotransferase or related aminotransferase	E
COG0160	4-aminobutyrate aminotransferase or related aminotransferase	E
COG0160	4-aminobutyrate aminotransferase or related aminotransferase	E
COG0161	Adenosylmethionine-8-amino-7-oxononanoate aminotransferase	H
COG0162	Tyrosyl-tRNA synthetase	J
COG0163	3-polyprenyl-4-hydroxybenzoate decarboxylase	H
COG0163	3-polyprenyl-4-hydroxybenzoate decarboxylase	H
COG0164	Ribonuclease HII	L
COG0165	Argininosuccinate lyase	E
COG0166	Glucose-6-phosphate isomerase	G
COG0167	Dihydroorotate dehydrogenase	F
COG0167	Dihydroorotate dehydrogenase<<>>COG1146	F
COG0168	Trk-type K+ transport system, membrane component	P
COG0168	Trk-type K+ transport system, membrane component	P
COG0169	Shikimate 5-dehydrogenase	E
COG0169	Shikimate 5-dehydrogenase	E
COG0171	NH3-dependent NAD+ synthetase	H
COG0172	Seryl-tRNA synthetase	J
COG0172	Seryl-tRNA synthetase	J
COG0172	Seryl-tRNA synthetase	J
COG0172	Seryl-tRNA synthetase	J
COG0173	Aspartyl-tRNA synthetase	J
COG0174	Glutamine synthetase	E
COG0174	Glutamine synthetase	E
COG0175	3'-phosphoadenosine 5'-phosphosulfate sulfotransferase (PAPS reductase)/FAD synthetase or related enzyme	E H
COG0176	Transaldolase	G
COG0176	Transaldolase	G
COG0177	Endonuclease III	L
COG0178	Excinuclease UvrABC ATPase subunit	L
COG0179	2-keto-4-pentenoate hydratase/2-oxohepta-3-ene-1,7-dioic acid hydratase (catechol pathway)	Q
COG0179	2-keto-4-pentenoate hydratase/2-oxohepta-3-ene-1,7-dioic acid hydratase (catechol pathway)	Q
COG0180	Tryptophanyl-tRNA synthetase	J
COG0180	Tryptophanyl-tRNA synthetase	J
COG0180	Tryptophanyl-tRNA synthetase	J
COG0181	Porphobilinogen deaminase	H
COG0182	Methylthioribose-1-phosphate isomerase (methionine salvage pathway), a paralog of eIF-2B alpha subunit	E
COG0184	Ribosomal protein S15P/S13E	J
COG0185	Ribosomal protein S19	J
COG0186	Ribosomal protein S17	J
COG0187	DNA gyrase/topoisomerase IV, subunit B	L
COG0187	DNA gyrase/topoisomerase IV, subunit B	L
COG0188	DNA gyrase/topoisomerase IV, subunit A	L
COG0188	DNA gyrase/topoisomerase IV, subunit A	L
COG0189	Glutathione synthase/RimK-type ligase, ATP-grasp superfamily	J E H Q
COG0189	Glutathione synthase/RimK-type ligase, ATP-grasp superfamily	J E H Q
COG0189	Glutathione synthase/RimK-type ligase, ATP-grasp superfamily	J E H Q
COG0189	Glutathione synthase/RimK-type ligase, ATP-grasp superfamily	J E H Q
COG0190	5,10-methylene-tetrahydrofolate dehydrogenase/Methenyl tetrahydrofolate cyclohydrolase	H
COG0191	Fructose/tagatose bisphosphate aldolase	G
COG0192	S-adenosylmethionine synthetase	H
COG0193	Peptidyl-tRNA hydrolase	J
COG0194	Guanylate kinase	F
COG0195	Transcription antitermination factor NusA, contains S1 and KH domains	K
COG0196	FAD synthase	H
COG0197	Ribosomal protein L16/L10AE	J
COG0198	Ribosomal protein L24	J
COG0199	Ribosomal protein S14	J
COG0199	Ribosomal protein S14	J
COG0200	Ribosomal protein L15	J
COG0201	Preprotein translocase subunit SecY	U
COG0202	DNA-directed RNA polymerase, alpha subunit/40 kD subunit	K
COG0203	Ribosomal protein L17	J
COG0204	1-acyl-sn-glycerol-3-phosphate acyltransferase	I
COG0204	1-acyl-sn-glycerol-3-phosphate acyltransferase	I
COG0205	6-phosphofructokinase	G
COG0206	Cell division GTPase FtsZ	D
COG0207	Thymidylate synthase	F
COG0208	Ribonucleotide reductase beta subunit, ferritin-like domain	F
COG0209	Ribonucleotide reductase alpha subunit<<>>COG1998	F
COG0209	Ribonucleotide reductase alpha subunit	F
COG0210	Superfamily I DNA or RNA helicase	L
COG0210	Superfamily I DNA or RNA helicase	L
COG0211	Ribosomal protein L27	J
COG0212	5-formyltetrahydrofolate cyclo-ligase	H
COG0213	Thymidine phosphorylase	F
COG0214	Pyridoxal biosynthesis lyase PdxS	H
COG0215	Cysteinyl-tRNA synthetase	J
COG0216	Protein chain release factor A	J
COG0217	Transcriptional and/or translational regulatory protein YebC/TACO1	J K
COG0218	GTP-binding protein EngB required for normal cell division	D
COG0219	tRNA(Leu) C34 or U34 (ribose-2'-O)-methylase TrmL, contains SPOUT domain	J
COG0220	tRNA G46 methylase TrmB	J
COG0222	Ribosomal protein L7/L12	J
COG0222	Ribosomal protein L7/L12	J
COG0223	Methionyl-tRNA formyltransferase	J
COG0224	FoF1-type ATP synthase, gamma subunit	C
COG0225	Peptide methionine sulfoxide reductase MsrA	O
COG0225	Peptide methionine sulfoxide reductase MsrA<<>>COG0229	O
COG0225	Peptide methionine sulfoxide reductase MsrA<<>>COG0229	O
COG0226	ABC-type phosphate transport system, periplasmic component	P
COG0226	ABC-type phosphate transport system, periplasmic component	P
COG0227	Ribosomal protein L28	J
COG0228	Ribosomal protein S16	J
COG0230	Ribosomal protein L34	J
COG0231	Translation elongation factor P (EF-P)/translation initiation factor 5A (eIF-5A)	J
COG0232	dGTP triphosphohydrolase	F
COG0233	Ribosome recycling factor	J
COG0234	Co-chaperonin GroES (HSP10)	O
COG0235	Ribulose-5-phosphate 4-epimerase/Fuculose-1-phosphate aldolase	G E
COG0235	Ribulose-5-phosphate 4-epimerase/Fuculose-1-phosphate aldolase	G E
COG0235	Ribulose-5-phosphate 4-epimerase/Fuculose-1-phosphate aldolase	G E
COG0235	Ribulose-5-phosphate 4-epimerase/Fuculose-1-phosphate aldolase	G E
COG0236	Acyl carrier protein	I
COG0236	Acyl carrier protein	I
COG0236	Acyl carrier protein	I
COG0236	Acyl carrier protein	I
COG0236	Acyl carrier protein	I
COG0236	Acyl carrier protein<<>>COG1020	I
COG0236	Acyl carrier protein<<>>COG1020	I
COG0236	Acyl carrier protein	I
COG0237	Dephospho-CoA kinase	H
COG0237	Dephospho-CoA kinase	H
COG0237	Dephospho-CoA kinase	H
COG0238	Ribosomal protein S18	J
COG0239	Fluoride ion exporter CrcB/FEX, affects chromosome condensation	D P
COG0239	Fluoride ion exporter CrcB/FEX, affects chromosome condensation	D P
COG0240	Glycerol-3-phosphate dehydrogenase	C
COG0241	Histidinol phosphatase or a related phosphatase	E
COG0242	Peptide deformylase	J
COG0243	Anaerobic selenocysteine-containing dehydrogenase	C
COG0244	Ribosomal protein L10	J
COG0245	2C-methyl-D-erythritol 2,4-cyclodiphosphate synthase	I
COG0246	Mannitol-1-phosphate/altronate dehydrogenases	G
COG0246	Mannitol-1-phosphate/altronate dehydrogenases	G
COG0246	Mannitol-1-phosphate/altronate dehydrogenases	G
COG0247	Fe-S oxidoreductase	C
COG0248	Exopolyphosphatase/pppGpp-phosphohydrolase	T F
COG0249	DNA mismatch repair ATPase MutS	L
COG0250	Transcription antitermination factor NusG	K
COG0250	Transcription antitermination factor NusG	K
COG0251	Enamine deaminase RidA, house cleaning of reactive enamine intermediates, YjgF/YER057c/UK114 family	V
COG0251	Enamine deaminase RidA, house cleaning of reactive enamine intermediates, YjgF/YER057c/UK114 family	V
COG0251	Enamine deaminase RidA, house cleaning of reactive enamine intermediates, YjgF/YER057c/UK114 family	V
COG0251	Enamine deaminase RidA, house cleaning of reactive enamine intermediates, YjgF/YER057c/UK114 family	V
COG0251	Enamine deaminase RidA, house cleaning of reactive enamine intermediates, YjgF/YER057c/UK114 family	V
COG0251	Enamine deaminase RidA, house cleaning of reactive enamine intermediates, YjgF/YER057c/UK114 family	V
COG0252	L-asparaginase/archaeal Glu-tRNAGln amidotransferase subunit D	J E
COG0253	Diaminopimelate epimerase	E
COG0254	Ribosomal protein L31	J
COG0254	Ribosomal protein L31	J
COG0255	Ribosomal protein L29	J
COG0256	Ribosomal protein L18	J
COG0257	Ribosomal protein L36	J
COG0258	5'-3' exonuclease	L
COG0258	5'-3' exonuclease<<>>COG0749	L
COG0259	Pyridoxine/pyridoxamine 5'-phosphate oxidase	H
COG0261	Ribosomal protein L21	J
COG0262	Dihydrofolate reductase	H
COG0262	Dihydrofolate reductase	H
COG0263	Glutamate 5-kinase	E
COG0264	Translation elongation factor EF-Ts	J
COG0265	Periplasmic serine protease, S1-C subfamily, contain C-terminal PDZ domain	O
COG0265	Periplasmic serine protease, S1-C subfamily, contain C-terminal PDZ domain	O
COG0265	Periplasmic serine protease, S1-C subfamily, contain C-terminal PDZ domain	O
COG0265	Periplasmic serine protease, S1-C subfamily, contain C-terminal PDZ domain	O
COG0265	Periplasmic serine protease, S1-C subfamily, contain C-terminal PDZ domain	O
COG0266	Formamidopyrimidine-DNA glycosylase	L
COG0266	Formamidopyrimidine-DNA glycosylase	L
COG0267	Ribosomal protein L33	J
COG0268	Ribosomal protein S20	J
COG0269	3-keto-L-gulonate-6-phosphate decarboxylase	G
COG0272	NAD-dependent DNA ligase	L
COG0274	Deoxyribose-phosphate aldolase	F
COG0275	16S rRNA C1402 N4-methylase RsmH	J
COG0276	Protoheme ferro-lyase (ferrochelatase)	H
COG0281	Malic enzyme	C
COG0282	Acetate kinase	C
COG0283	Cytidylate kinase	F
COG0284	Orotidine-5'-phosphate decarboxylase	F
COG0285	Folylpolyglutamate synthase/Dihydropteroate synthase	H
COG0286	Type I restriction-modification system, DNA methylase subunit	V
COG0287	Prephenate dehydrogenase	E
COG0288	Carbonic anhydrase	P
COG0289	Dihydrodipicolinate reductase	E
COG0290	Translation initiation factor IF-3	J
COG0290	Translation initiation factor IF-3	J
COG0291	Ribosomal protein L35	J
COG0292	Ribosomal protein L20	J
COG0294	Dihydropteroate synthase	H
COG0295	Cytidine deaminase	F
COG0295	Cytidine deaminase	F
COG0296	1,4-alpha-glucan branching enzyme	G
COG0296	1,4-alpha-glucan branching enzyme	G
COG0297	Glycogen synthase	G
COG0299	Folate-dependent phosphoribosylglycinamide formyltransferase PurN	F
COG0300	Short-chain dehydrogenase	R
COG0300	Short-chain dehydrogenase	R
COG0300	Short-chain dehydrogenase	R
COG0300	Short-chain dehydrogenase	R
COG0300	Short-chain dehydrogenase	R
COG0300	Short-chain dehydrogenase	R
COG0300	Short-chain dehydrogenase	R
COG0301	Adenylyl- and sulfurtransferase ThiI, participates in tRNA 4-thiouridine and thiamine biosynthesis	J H
COG0302	GTP cyclohydrolase I	H
COG0303	Molybdopterin biosynthesis enzyme	H
COG0304	3-oxoacyl-(acyl-carrier-protein) synthase	I Q
COG0304	3-oxoacyl-(acyl-carrier-protein) synthase	I Q
COG0304	3-oxoacyl-(acyl-carrier-protein) synthase	I Q
COG0305	Replicative DNA helicase	L
COG0305	Replicative DNA helicase	L
COG0306	Phosphate/sulfate permease	P
COG0307	Riboflavin synthase alpha chain	H
COG0311	Glutamine amidotransferase PdxT (pyridoxal biosynthesis)	H
COG0313	16S rRNA C1402 (ribose-2'-O) methylase RsmI	J
COG0314	Molybdopterin synthase catalytic subunit<<>>COG1977	H
COG0315	Molybdenum cofactor biosynthesis enzyme	H
COG0316	Fe-S cluster assembly iron-binding protein IscA	O
COG0316	Fe-S cluster assembly iron-binding protein IscA	O
COG0316	Fe-S cluster assembly iron-binding protein IscA	O
COG0317	(p)ppGpp synthase/hydrolase, HD superfamily	K T
COG0318	Acyl-CoA synthetase (AMP-forming)/AMP-acid ligase II	I
COG0318	Acyl-CoA synthetase (AMP-forming)/AMP-acid ligase II	I
COG0318	Acyl-CoA synthetase (AMP-forming)/AMP-acid ligase II	I
COG0319	ssRNA-specific RNase YbeY, 16S rRNA maturation enzyme	J
COG0320	Lipoate synthase	H
COG0321	Lipoate-protein ligase B	H
COG0322	Excinuclease UvrABC, nuclease subunit	L
COG0323	DNA mismatch repair ATPase MutL	L
COG0324	tRNA A37 N6-isopentenylltransferase MiaA	J
COG0325	Uncharacterized pyridoxal phosphate-containing protein, affects Ilv metabolism, UPF0001 family	H
COG0325	Uncharacterized pyridoxal phosphate-containing protein, affects Ilv metabolism, UPF0001 family	H
COG0326	Molecular chaperone, HSP90 family	O
COG0326	Molecular chaperone, HSP90 family	O
COG0327	Putative GTP cyclohydrolase 1 type 2, NIF3 family	H
COG0327	Putative GTP cyclohydrolase 1 type 2, NIF3 family	H
COG0327	Putative GTP cyclohydrolase 1 type 2, NIF3 family	H
COG0329	Dihydrodipicolinate synthase/N-acetylneuraminate lyase	M E
COG0330	Regulator of protease activity HflC, stomatin/prohibitin superfamily	O
COG0331	Malonyl CoA-acyl carrier protein transacylase	I
COG0331	Malonyl CoA-acyl carrier protein transacylase	I
COG0331	Malonyl CoA-acyl carrier protein transacylase	I
COG0331	Malonyl CoA-acyl carrier protein transacylase	I
COG0332	3-oxoacyl-[acyl-carrier-protein] synthase III	I
COG0332	3-oxoacyl-[acyl-carrier-protein] synthase III	I
COG0332	3-oxoacyl-[acyl-carrier-protein] synthase III	I
COG0332	3-oxoacyl-[acyl-carrier-protein] synthase III	I
COG0332	3-oxoacyl-[acyl-carrier-protein] synthase III	I
COG0332	3-oxoacyl-[acyl-carrier-protein] synthase III	I
COG0333	Ribosomal protein L32	J
COG0334	Glutamate dehydrogenase/leucine dehydrogenase	E
COG0334	Glutamate dehydrogenase/leucine dehydrogenase	E
COG0334	Glutamate dehydrogenase/leucine dehydrogenase	E
COG0335	Ribosomal protein L19	J
COG0336	tRNA G37 N-methylase TrmD	J
COG0337	3-dehydroquinate synthetase	E
COG0340	Biotin-(acetyl-CoA carboxylase) ligase<<>>COG1654	H
COG0341	Preprotein translocase subunit SecF	U
COG0342	Preprotein translocase subunit SecD	U
COG0343	Queuine/archaeosine tRNA-ribosyltransferase	J
COG0343	Queuine/archaeosine tRNA-ribosyltransferase	J
COG0344	Phospholipid biosynthesis protein PlsY, probable glycerol-3-phosphate acyltransferase	I
COG0345	Pyrroline-5-carboxylate reductase	E
COG0345	Pyrroline-5-carboxylate reductase	E
COG0346	Catechol 2,3-dioxygenase or other lactoylglutathione lyase family enzyme	Q
COG0346	Catechol 2,3-dioxygenase or other lactoylglutathione lyase family enzyme	Q
COG0346	Catechol 2,3-dioxygenase or other lactoylglutathione lyase family enzyme	Q
COG0346	Catechol 2,3-dioxygenase or other lactoylglutathione lyase family enzyme	Q
COG0346	Catechol 2,3-dioxygenase or other lactoylglutathione lyase family enzyme	Q
COG0346	Catechol 2,3-dioxygenase or other lactoylglutathione lyase family enzyme	Q
COG0346	Catechol 2,3-dioxygenase or other lactoylglutathione lyase family enzyme	Q
COG0346	Catechol 2,3-dioxygenase or other lactoylglutathione lyase family enzyme	Q
COG0346	Catechol 2,3-dioxygenase or other lactoylglutathione lyase family enzyme	Q
COG0346	Catechol 2,3-dioxygenase or other lactoylglutathione lyase family enzyme	Q
COG0346	Catechol 2,3-dioxygenase or other lactoylglutathione lyase family enzyme	Q
COG0346	Catechol 2,3-dioxygenase or other lactoylglutathione lyase family enzyme	Q
COG0346	Catechol 2,3-dioxygenase or other lactoylglutathione lyase family enzyme	Q
COG0346	Catechol 2,3-dioxygenase or other lactoylglutathione lyase family enzyme	Q
COG0346	Catechol 2,3-dioxygenase or other lactoylglutathione lyase family enzyme	Q
COG0346	Catechol 2,3-dioxygenase or other lactoylglutathione lyase family enzyme	Q
COG0346	Catechol 2,3-dioxygenase or other lactoylglutathione lyase family enzyme	Q
COG0350	O6-methylguanine-DNA--protein-cysteine methyltransferase	L
COG0350	O6-methylguanine-DNA--protein-cysteine methyltransferase<<>>COG1600	L
COG0351	Hydroxymethylpyrimidine/phosphomethylpyrimidine kinase	H
COG0351	Hydroxymethylpyrimidine/phosphomethylpyrimidine kinase	H
COG0352	Thiamine monophosphate synthase	H
COG0352	Thiamine monophosphate synthase	H
COG0353	Recombinational DNA repair protein RecR	L
COG0355	FoF1-type ATP synthase, epsilon subunit	C
COG0356	FoF1-type ATP synthase, membrane subunit a	C
COG0357	16S rRNA G527 N7-methylase RsmG (former glucose-inhibited division protein B)	J
COG0358	DNA primase (bacterial type)	L
COG0358	DNA primase (bacterial type)	L
COG0359	Ribosomal protein L9	J
COG0360	Ribosomal protein S6	J
COG0361	Translation initiation factor IF-1	J
COG0362	6-phosphogluconate dehydrogenase	G
COG0362	6-phosphogluconate dehydrogenase	G
COG0363	6-phosphogluconolactonase/Glucosamine-6-phosphate isomerase/deaminase	G
COG0364	Glucose-6-phosphate 1-dehydrogenase	G
COG0364	Glucose-6-phosphate 1-dehydrogenase	G
COG0364	Glucose-6-phosphate 1-dehydrogenase	G
COG0365	Acyl-coenzyme A synthetase/AMP-(fatty) acid ligase	I
COG0365	Acyl-coenzyme A synthetase/AMP-(fatty) acid ligase	I
COG0366	Glycosidase	G
COG0366	Glycosidase	G
COG0366	Glycosidase	G
COG0366	Glycosidase	G
COG0366	Glycosidase	G
COG0366	Glycosidase	G
COG0366	Glycosidase	G
COG0366	Glycosidase	G
COG0366	Glycosidase	G
COG0366	Glycosidase	G
COG0366	Glycosidase	G
COG0367	Asparagine synthetase B (glutamine-hydrolyzing)	E
COG0367	Asparagine synthetase B (glutamine-hydrolyzing)	E
COG0368	Cobalamin synthase	H
COG0369	Sulfite reductase, alpha subunit (flavoprotein)<<>>COG2124	F P
COG0369	Sulfite reductase, alpha subunit (flavoprotein)	F P
COG0369	Sulfite reductase, alpha subunit (flavoprotein)<<>>COG2124	F P
COG0371	Glycerol dehydrogenase or related enzyme, iron-containing ADH family	C
COG0371	Glycerol dehydrogenase or related enzyme, iron-containing ADH family	C
COG0372	Citrate synthase	C
COG0373	Glutamyl-tRNA reductase	H
COG0378	Ni2+-binding GTPase involved in regulation of expression and maturation of urease and hydrogenase	O
COG0379	Quinolinate synthase	H
COG0381	UDP-N-acetylglucosamine 2-epimerase	M
COG0381	UDP-N-acetylglucosamine 2-epimerase	M
COG0382	4-hydroxybenzoate polyprenyltransferase	H
COG0382	4-hydroxybenzoate polyprenyltransferase	H
COG0383	Alpha-mannosidase	G
COG0383	Alpha-mannosidase	G
COG0383	Alpha-mannosidase	G
COG0383	Alpha-mannosidase	G
COG0383	Alpha-mannosidase	G
COG0383	Alpha-mannosidase	G
COG0383	Alpha-mannosidase	G
COG0384	Predicted epimerase YddE/YHI9, PhzF superfamily	R
COG0384	Predicted epimerase YddE/YHI9, PhzF superfamily	R
COG0385	Predicted Na+-dependent transporter	R
COG0386	Glutathione peroxidase, house-cleaning role in reducing lipid peroxides	V I
COG0386	Glutathione peroxidase, house-cleaning role in reducing lipid peroxides	V I
COG0386	Glutathione peroxidase, house-cleaning role in reducing lipid peroxides	V I
COG0386	Glutathione peroxidase, house-cleaning role in reducing lipid peroxides	V I
COG0387	Ca2+/H+ antiporter	P
COG0388	Predicted amidohydrolase	V
COG0388	Predicted amidohydrolase	V
COG0388	Predicted amidohydrolase	V
COG0389	Nucleotidyltransferase/DNA polymerase involved in DNA repair	L
COG0389	Nucleotidyltransferase/DNA polymerase involved in DNA repair	L
COG0389	Nucleotidyltransferase/DNA polymerase involved in DNA repair	L
COG0391	Archaeal 2-phospho-L-lactate transferase/Bacterial gluconeogenesis factor, CofD/UPF0052 family	G H
COG0394	Protein-tyrosine-phosphatase	T
COG0394	Protein-tyrosine-phosphatase	T
COG0395	ABC-type glycerol-3-phosphate transport system, permease component	G
COG0395	ABC-type glycerol-3-phosphate transport system, permease component	G
COG0395	ABC-type glycerol-3-phosphate transport system, permease component	G
COG0395	ABC-type glycerol-3-phosphate transport system, permease component	G
COG0395	ABC-type glycerol-3-phosphate transport system, permease component	G
COG0395	ABC-type glycerol-3-phosphate transport system, permease component	G
COG0395	ABC-type glycerol-3-phosphate transport system, permease component	G
COG0395	ABC-type glycerol-3-phosphate transport system, permease component	G
COG0395	ABC-type glycerol-3-phosphate transport system, permease component	G
COG0395	ABC-type glycerol-3-phosphate transport system, permease component	G
COG0395	ABC-type glycerol-3-phosphate transport system, permease component	G
COG0395	ABC-type glycerol-3-phosphate transport system, permease component	G
COG0395	ABC-type glycerol-3-phosphate transport system, permease component	G
COG0395	ABC-type glycerol-3-phosphate transport system, permease component	G
COG0395	ABC-type glycerol-3-phosphate transport system, permease component	G
COG0395	ABC-type glycerol-3-phosphate transport system, permease component	G
COG0395	ABC-type glycerol-3-phosphate transport system, permease component	G
COG0395	ABC-type glycerol-3-phosphate transport system, permease component	G
COG0395	ABC-type glycerol-3-phosphate transport system, permease component	G
COG0395	ABC-type glycerol-3-phosphate transport system, permease component	G
COG0395	ABC-type glycerol-3-phosphate transport system, permease component	G
COG0395	ABC-type glycerol-3-phosphate transport system, permease component	G
COG0395	ABC-type glycerol-3-phosphate transport system, permease component	G
COG0395	ABC-type glycerol-3-phosphate transport system, permease component	G
COG0395	ABC-type glycerol-3-phosphate transport system, permease component	G
COG0395	ABC-type glycerol-3-phosphate transport system, permease component	G
COG0395	ABC-type glycerol-3-phosphate transport system, permease component	G
COG0395	ABC-type glycerol-3-phosphate transport system, permease component	G
COG0395	ABC-type glycerol-3-phosphate transport system, permease component	G
COG0395	ABC-type glycerol-3-phosphate transport system, permease component	G
COG0395	ABC-type glycerol-3-phosphate transport system, permease component	G
COG0395	ABC-type glycerol-3-phosphate transport system, permease component	G
COG0395	ABC-type glycerol-3-phosphate transport system, permease component	G
COG0395	ABC-type glycerol-3-phosphate transport system, permease component	G
COG0395	ABC-type glycerol-3-phosphate transport system, permease component	G
COG0395	ABC-type glycerol-3-phosphate transport system, permease component	G
COG0395	ABC-type glycerol-3-phosphate transport system, permease component	G
COG0395	ABC-type glycerol-3-phosphate transport system, permease component	G
COG0395	ABC-type glycerol-3-phosphate transport system, permease component	G
COG0395	ABC-type glycerol-3-phosphate transport system, permease component	G
COG0395	ABC-type glycerol-3-phosphate transport system, permease component	G
COG0395	ABC-type glycerol-3-phosphate transport system, permease component	G
COG0395	ABC-type glycerol-3-phosphate transport system, permease component	G
COG0395	ABC-type glycerol-3-phosphate transport system, permease component	G
COG0395	ABC-type glycerol-3-phosphate transport system, permease component	G
COG0395	ABC-type glycerol-3-phosphate transport system, permease component	G
COG0395	ABC-type glycerol-3-phosphate transport system, permease component	G
COG0395	ABC-type glycerol-3-phosphate transport system, permease component	G
COG0395	ABC-type glycerol-3-phosphate transport system, permease component	G
COG0395	ABC-type glycerol-3-phosphate transport system, permease component	G
COG0395	ABC-type glycerol-3-phosphate transport system, permease component	G
COG0395	ABC-type glycerol-3-phosphate transport system, permease component	G
COG0395	ABC-type glycerol-3-phosphate transport system, permease component	G
COG0395	ABC-type glycerol-3-phosphate transport system, permease component	G
COG0395	ABC-type glycerol-3-phosphate transport system, permease component	G
COG0395	ABC-type glycerol-3-phosphate transport system, permease component	G
COG0395	ABC-type glycerol-3-phosphate transport system, permease component	G
COG0395	ABC-type glycerol-3-phosphate transport system, permease component	G
COG0395	ABC-type glycerol-3-phosphate transport system, permease component	G
COG0395	ABC-type glycerol-3-phosphate transport system, permease component	G
COG0395	ABC-type glycerol-3-phosphate transport system, permease component	G
COG0395	ABC-type glycerol-3-phosphate transport system, permease component	G
COG0395	ABC-type glycerol-3-phosphate transport system, permease component	G
COG0395	ABC-type glycerol-3-phosphate transport system, permease component	G
COG0395	ABC-type glycerol-3-phosphate transport system, permease component	G
COG0395	ABC-type glycerol-3-phosphate transport system, permease component	G
COG0396	Fe-S cluster assembly ATPase SufC	O
COG0397	Uncharacterized conserved protein YdiU, UPF0061 family	O
COG0398	Uncharacterized membrane protein YdjX, TVP38/TMEM64 family, SNARE-associated domain	S
COG0398	Uncharacterized membrane protein YdjX, TVP38/TMEM64 family, SNARE-associated domain	S
COG0399	dTDP-4-amino-4,6-dideoxygalactose transaminase	M
COG0400	Predicted esterase	R
COG0400	Predicted esterase	R
COG0402	Cytosine/adenosine deaminase or related metal-dependent hydrolase	F R
COG0402	Cytosine/adenosine deaminase or related metal-dependent hydrolase	F R
COG0402	Cytosine/adenosine deaminase or related metal-dependent hydrolase	F R
COG0402	Cytosine/adenosine deaminase or related metal-dependent hydrolase	F R
COG0402	Cytosine/adenosine deaminase or related metal-dependent hydrolase	F R
COG0402	Cytosine/adenosine deaminase or related metal-dependent hydrolase	F R
COG0402	Cytosine/adenosine deaminase or related metal-dependent hydrolase	F R
COG0402	Cytosine/adenosine deaminase or related metal-dependent hydrolase	F R
COG0402	Cytosine/adenosine deaminase or related metal-dependent hydrolase	F R
COG0402	Cytosine/adenosine deaminase or related metal-dependent hydrolase	F R
COG0403	Glycine cleavage system protein P (pyridoxal-binding), N-terminal domain	E
COG0404	Glycine cleavage system T protein (aminomethyltransferase)	E
COG0405	Gamma-glutamyltranspeptidase	E
COG0405	Gamma-glutamyltranspeptidase	E
COG0406	Broad specificity phosphatase PhoE	G
COG0406	Broad specificity phosphatase PhoE	G
COG0406	Broad specificity phosphatase PhoE	G
COG0406	Broad specificity phosphatase PhoE	G
COG0406	Broad specificity phosphatase PhoE	G
COG0406	Broad specificity phosphatase PhoE	G
COG0406	Broad specificity phosphatase PhoE	G
COG0406	Broad specificity phosphatase PhoE	G
COG0406	Broad specificity phosphatase PhoE	G
COG0406	Broad specificity phosphatase PhoE	G
COG0406	Broad specificity phosphatase PhoE	G
COG0407	Uroporphyrinogen-III decarboxylase	H
COG0410	ABC-type branched-chain amino acid transport system, ATPase component	E
COG0412	Dienelactone hydrolase	Q
COG0412	Dienelactone hydrolase	Q
COG0412	Dienelactone hydrolase	Q
COG0412	Dienelactone hydrolase<<>>COG4095	Q
COG0412	Dienelactone hydrolase	Q
COG0413	Ketopantoate hydroxymethyltransferase	H
COG0414	Panthothenate synthetase	H
COG0415	Deoxyribodipyrimidine photolyase	L
COG0416	Fatty acid/phospholipid biosynthesis enzyme	I
COG0419	DNA repair exonuclease SbcCD ATPase subunit	L
COG0420	DNA repair exonuclease SbcCD nuclease subunit	L
COG0421	Spermidine synthase	E
COG0421	Spermidine synthase	E
COG0422	Thiamine biosynthesis protein ThiC	H
COG0424	Predicted house-cleaning NTP pyrophosphatase, Maf/HAM1 superfamily	Q
COG0425	TusA-related sulfurtransferase<<>>COG0607	J O H
COG0428	Zinc transporter ZupT	P
COG0428	Zinc transporter ZupT	P
COG0431	NAD(P)H-dependent FMN reductase	C
COG0431	NAD(P)H-dependent FMN reductase	C
COG0431	NAD(P)H-dependent FMN reductase	C
COG0431	NAD(P)H-dependent FMN reductase<<>>COG1053	C
COG0431	NAD(P)H-dependent FMN reductase	C
COG0431	NAD(P)H-dependent FMN reductase	C
COG0432	Thiamin phosphate synthase YjbQ, UPF0047 family	H
COG0436	Aspartate/methionine/tyrosine aminotransferase	E
COG0436	Aspartate/methionine/tyrosine aminotransferase	E
COG0436	Aspartate/methionine/tyrosine aminotransferase	E
COG0436	Aspartate/methionine/tyrosine aminotransferase	E
COG0436	Aspartate/methionine/tyrosine aminotransferase	E
COG0438	Glycosyltransferase involved in cell wall bisynthesis	M
COG0438	Glycosyltransferase involved in cell wall bisynthesis	M
COG0438	Glycosyltransferase involved in cell wall bisynthesis	M
COG0438	Glycosyltransferase involved in cell wall bisynthesis	M
COG0438	Glycosyltransferase involved in cell wall bisynthesis	M
COG0438	Glycosyltransferase involved in cell wall bisynthesis	M
COG0438	Glycosyltransferase involved in cell wall bisynthesis	M
COG0438	Glycosyltransferase involved in cell wall bisynthesis	M
COG0438	Glycosyltransferase involved in cell wall bisynthesis	M
COG0438	Glycosyltransferase involved in cell wall bisynthesis	M
COG0438	Glycosyltransferase involved in cell wall bisynthesis	M
COG0438	Glycosyltransferase involved in cell wall bisynthesis	M
COG0438	Glycosyltransferase involved in cell wall bisynthesis	M
COG0438	Glycosyltransferase involved in cell wall bisynthesis	M
COG0439	Biotin carboxylase	I
COG0439	Biotin carboxylase	I
COG0440	Acetolactate synthase, small subunit	E
COG0441	Threonyl-tRNA synthetase	J
COG0441	Threonyl-tRNA synthetase	J
COG0442	Prolyl-tRNA synthetase	J
COG0442	Prolyl-tRNA synthetase	J
COG0443	Molecular chaperone DnaK (HSP70)	O
COG0443	Molecular chaperone DnaK (HSP70)	O
COG0444	ABC-type dipeptide/oligopeptide/nickel transport system, ATPase component	E P
COG0444	ABC-type dipeptide/oligopeptide/nickel transport system, ATPase component	E P
COG0444	ABC-type dipeptide/oligopeptide/nickel transport system, ATPase component	E P
COG0444	ABC-type dipeptide/oligopeptide/nickel transport system, ATPase component	E P
COG0444	ABC-type dipeptide/oligopeptide/nickel transport system, ATPase component	E P
COG0445	tRNA U34 5-carboxymethylaminomethyl modifying enzyme MnmG/GidA	J
COG0446	NADPH-dependent 2,4-dienoyl-CoA reductase, sulfur reductase, or a related oxidoreductase	I
COG0448	ADP-glucose pyrophosphorylase	G
COG0448	ADP-glucose pyrophosphorylase	G
COG0448	ADP-glucose pyrophosphorylase	G
COG0449	Glucosamine 6-phosphate synthetase, contains amidotransferase and phosphosugar isomerase domains	M
COG0450	Alkyl hydroperoxide reductase subunit AhpC (peroxiredoxin)	V
COG0451	Nucleoside-diphosphate-sugar epimerase	M
COG0451	Nucleoside-diphosphate-sugar epimerase	M
COG0451	Nucleoside-diphosphate-sugar epimerase	M
COG0451	Nucleoside-diphosphate-sugar epimerase	M
COG0451	Nucleoside-diphosphate-sugar epimerase	M
COG0451	Nucleoside-diphosphate-sugar epimerase	M
COG0451	Nucleoside-diphosphate-sugar epimerase	M
COG0451	Nucleoside-diphosphate-sugar epimerase<<>>COG0596	M
COG0451	Nucleoside-diphosphate-sugar epimerase	M
COG0451	Nucleoside-diphosphate-sugar epimerase	M
COG0451	Nucleoside-diphosphate-sugar epimerase	M
COG0451	Nucleoside-diphosphate-sugar epimerase	M
COG0452	Phosphopantothenoylcysteine synthetase/decarboxylase	H
COG0454	N-acetyltransferase, GNAT superfamily (includes histone acetyltransferase HPA2)	K R
COG0454	N-acetyltransferase, GNAT superfamily (includes histone acetyltransferase HPA2)	K R
COG0454	N-acetyltransferase, GNAT superfamily (includes histone acetyltransferase HPA2)	K R
COG0454	N-acetyltransferase, GNAT superfamily (includes histone acetyltransferase HPA2)	K R
COG0454	N-acetyltransferase, GNAT superfamily (includes histone acetyltransferase HPA2)	K R
COG0454	N-acetyltransferase, GNAT superfamily (includes histone acetyltransferase HPA2)	K R
COG0454	N-acetyltransferase, GNAT superfamily (includes histone acetyltransferase HPA2)	K R
COG0454	N-acetyltransferase, GNAT superfamily (includes histone acetyltransferase HPA2)	K R
COG0454	N-acetyltransferase, GNAT superfamily (includes histone acetyltransferase HPA2)	K R
COG0454	N-acetyltransferase, GNAT superfamily (includes histone acetyltransferase HPA2)	K R
COG0454	N-acetyltransferase, GNAT superfamily (includes histone acetyltransferase HPA2)	K R
COG0454	N-acetyltransferase, GNAT superfamily (includes histone acetyltransferase HPA2)	K R
COG0454	N-acetyltransferase, GNAT superfamily (includes histone acetyltransferase HPA2)	K R
COG0454	N-acetyltransferase, GNAT superfamily (includes histone acetyltransferase HPA2)	K R
COG0454	N-acetyltransferase, GNAT superfamily (includes histone acetyltransferase HPA2)	K R
COG0454	N-acetyltransferase, GNAT superfamily (includes histone acetyltransferase HPA2)	K R
COG0454	N-acetyltransferase, GNAT superfamily (includes histone acetyltransferase HPA2)	K R
COG0454	N-acetyltransferase, GNAT superfamily (includes histone acetyltransferase HPA2)	K R
COG0454	N-acetyltransferase, GNAT superfamily (includes histone acetyltransferase HPA2)	K R
COG0454	N-acetyltransferase, GNAT superfamily (includes histone acetyltransferase HPA2)	K R
COG0454	N-acetyltransferase, GNAT superfamily (includes histone acetyltransferase HPA2)	K R
COG0454	N-acetyltransferase, GNAT superfamily (includes histone acetyltransferase HPA2)	K R
COG0454	N-acetyltransferase, GNAT superfamily (includes histone acetyltransferase HPA2)	K R
COG0454	N-acetyltransferase, GNAT superfamily (includes histone acetyltransferase HPA2)	K R
COG0454	N-acetyltransferase, GNAT superfamily (includes histone acetyltransferase HPA2)	K R
COG0454	N-acetyltransferase, GNAT superfamily (includes histone acetyltransferase HPA2)	K R
COG0454	N-acetyltransferase, GNAT superfamily (includes histone acetyltransferase HPA2)	K R
COG0454	N-acetyltransferase, GNAT superfamily (includes histone acetyltransferase HPA2)	K R
COG0454	N-acetyltransferase, GNAT superfamily (includes histone acetyltransferase HPA2)	K R
COG0454	N-acetyltransferase, GNAT superfamily (includes histone acetyltransferase HPA2)	K R
COG0454	N-acetyltransferase, GNAT superfamily (includes histone acetyltransferase HPA2)	K R
COG0454	N-acetyltransferase, GNAT superfamily (includes histone acetyltransferase HPA2)	K R
COG0455	MinD-like ATPase involved in chromosome partitioning or flagellar assembly	D N
COG0455	MinD-like ATPase involved in chromosome partitioning or flagellar assembly	D N
COG0456	Ribosomal protein S18 acetylase RimI and related acetyltransferases	J
COG0456	Ribosomal protein S18 acetylase RimI and related acetyltransferases	J
COG0456	Ribosomal protein S18 acetylase RimI and related acetyltransferases	J
COG0456	Ribosomal protein S18 acetylase RimI and related acetyltransferases	J
COG0456	Ribosomal protein S18 acetylase RimI and related acetyltransferases	J
COG0456	Ribosomal protein S18 acetylase RimI and related acetyltransferases	J
COG0456	Ribosomal protein S18 acetylase RimI and related acetyltransferases	J
COG0456	Ribosomal protein S18 acetylase RimI and related acetyltransferases	J
COG0456	Ribosomal protein S18 acetylase RimI and related acetyltransferases	J
COG0456	Ribosomal protein S18 acetylase RimI and related acetyltransferases	J
COG0456	Ribosomal protein S18 acetylase RimI and related acetyltransferases	J
COG0456	Ribosomal protein S18 acetylase RimI and related acetyltransferases	J
COG0456	Ribosomal protein S18 acetylase RimI and related acetyltransferases	J
COG0456	Ribosomal protein S18 acetylase RimI and related acetyltransferases	J
COG0456	Ribosomal protein S18 acetylase RimI and related acetyltransferases	J
COG0456	Ribosomal protein S18 acetylase RimI and related acetyltransferases	J
COG0456	Ribosomal protein S18 acetylase RimI and related acetyltransferases	J
COG0456	Ribosomal protein S18 acetylase RimI and related acetyltransferases	J
COG0456	Ribosomal protein S18 acetylase RimI and related acetyltransferases	J
COG0456	Ribosomal protein S18 acetylase RimI and related acetyltransferases	J
COG0456	Ribosomal protein S18 acetylase RimI and related acetyltransferases	J
COG0456	Ribosomal protein S18 acetylase RimI and related acetyltransferases	J
COG0457	Tetratricopeptide (TPR) repeat	R
COG0457	Tetratricopeptide (TPR) repeat	R
COG0457	Tetratricopeptide (TPR) repeat	R
COG0457	Tetratricopeptide (TPR) repeat	R
COG0457	Tetratricopeptide (TPR) repeat	R
COG0457	Tetratricopeptide (TPR) repeat	R
COG0457	Tetratricopeptide (TPR) repeat	R
COG0457	Tetratricopeptide (TPR) repeat	R
COG0457	Tetratricopeptide (TPR) repeat	R
COG0457	Tetratricopeptide (TPR) repeat	R
COG0457	Tetratricopeptide (TPR) repeat	R
COG0457	Tetratricopeptide (TPR) repeat	R
COG0457	Tetratricopeptide (TPR) repeat	R
COG0457	Tetratricopeptide (TPR) repeat	R
COG0457	Tetratricopeptide (TPR) repeat	R
COG0457	Tetratricopeptide (TPR) repeat	R
COG0457	Tetratricopeptide (TPR) repeat	R
COG0457	Tetratricopeptide (TPR) repeat	R
COG0458	Carbamoylphosphate synthase large subunit	E F
COG0459	Chaperonin GroEL (HSP60 family)	O
COG0460	Homoserine dehydrogenase	E
COG0461	Orotate phosphoribosyltransferase	F
COG0462	Phosphoribosylpyrophosphate synthetase	F
COG0462	Phosphoribosylpyrophosphate synthetase	F
COG0463	Glycosyltransferase involved in cell wall bisynthesis	M
COG0463	Glycosyltransferase involved in cell wall bisynthesis	M
COG0463	Glycosyltransferase involved in cell wall bisynthesis	M
COG0463	Glycosyltransferase involved in cell wall bisynthesis	M
COG0463	Glycosyltransferase involved in cell wall bisynthesis	M
COG0463	Glycosyltransferase involved in cell wall bisynthesis	M
COG0464	AAA+-type ATPase, SpoVK/Ycf46/Vps4 family	D T M
COG0464	AAA+-type ATPase, SpoVK/Ycf46/Vps4 family	D T M
COG0465	ATP-dependent Zn proteases	O
COG0465	ATP-dependent Zn proteases	O
COG0465	ATP-dependent Zn proteases	O
COG0466	ATP-dependent Lon protease, bacterial type	O
COG0468	RecA/RadA recombinase	L
COG0469	Pyruvate kinase	G
COG0469	Pyruvate kinase	G
COG0472	UDP-N-acetylmuramyl pentapeptide phosphotransferase/UDP-N-acetylglucosamine-1-phosphate transferase	M
COG0472	UDP-N-acetylmuramyl pentapeptide phosphotransferase/UDP-N-acetylglucosamine-1-phosphate transferase	M
COG0472	UDP-N-acetylmuramyl pentapeptide phosphotransferase/UDP-N-acetylglucosamine-1-phosphate transferase	M
COG0473	Isocitrate/isopropylmalate dehydrogenase	C E
COG0474	Magnesium-transporting ATPase (P-type)	P
COG0474	Magnesium-transporting ATPase (P-type)	P
COG0474	Magnesium-transporting ATPase (P-type)	P
COG0474	Magnesium-transporting ATPase (P-type)	P
COG0474	Magnesium-transporting ATPase (P-type)	P
COG0475	Kef-type K+ transport system, membrane component KefB	P
COG0475	Kef-type K+ transport system, membrane component KefB	P
COG0475	Kef-type K+ transport system, membrane component KefB	P
COG0475	Kef-type K+ transport system, membrane component KefB	P
COG0476	Molybdopterin or thiamine biosynthesis adenylyltransferase	H
COG0477	MFS family permease	G E P R
COG0477	MFS family permease	G E P R
COG0477	MFS family permease	G E P R
COG0477	MFS family permease	G E P R
COG0477	MFS family permease	G E P R
COG0477	MFS family permease	G E P R
COG0477	MFS family permease	G E P R
COG0477	MFS family permease	G E P R
COG0477	MFS family permease	G E P R
COG0477	MFS family permease	G E P R
COG0477	MFS family permease	G E P R
COG0477	MFS family permease	G E P R
COG0477	MFS family permease	G E P R
COG0477	MFS family permease	G E P R
COG0477	MFS family permease	G E P R
COG0477	MFS family permease	G E P R
COG0477	MFS family permease	G E P R
COG0477	MFS family permease	G E P R
COG0477	MFS family permease	G E P R
COG0477	MFS family permease	G E P R
COG0477	MFS family permease	G E P R
COG0477	MFS family permease	G E P R
COG0477	MFS family permease	G E P R
COG0477	MFS family permease	G E P R
COG0477	MFS family permease	G E P R
COG0477	MFS family permease	G E P R
COG0477	MFS family permease	G E P R
COG0477	MFS family permease	G E P R
COG0477	MFS family permease	G E P R
COG0477	MFS family permease	G E P R
COG0477	MFS family permease	G E P R
COG0477	MFS family permease	G E P R
COG0477	MFS family permease	G E P R
COG0477	MFS family permease	G E P R
COG0477	MFS family permease	G E P R
COG0477	MFS family permease	G E P R
COG0477	MFS family permease	G E P R
COG0477	MFS family permease	G E P R
COG0477	MFS family permease	G E P R
COG0477	MFS family permease	G E P R
COG0477	MFS family permease	G E P R
COG0477	MFS family permease	G E P R
COG0477	MFS family permease	G E P R
COG0477	MFS family permease	G E P R
COG0477	MFS family permease	G E P R
COG0477	MFS family permease	G E P R
COG0477	MFS family permease	G E P R
COG0477	MFS family permease	G E P R
COG0477	MFS family permease	G E P R
COG0477	MFS family permease	G E P R
COG0477	MFS family permease	G E P R
COG0477	MFS family permease	G E P R
COG0477	MFS family permease	G E P R
COG0477	MFS family permease	G E P R
COG0477	MFS family permease	G E P R
COG0477	MFS family permease	G E P R
COG0477	MFS family permease	G E P R
COG0479	Succinate dehydrogenase/fumarate reductase, Fe-S protein subunit	C
COG0480	Translation elongation factor EF-G, a GTPase	J
COG0481	Translation elongation factor EF-4, membrane-bound GTPase	J
COG0482	tRNA U34 2-thiouridine synthase MnmA/TrmU, contains the PP-loop ATPase domain	J
COG0483	Archaeal fructose-1,6-bisphosphatase or related enzyme of inositol monophosphatase family	G
COG0483	Archaeal fructose-1,6-bisphosphatase or related enzyme of inositol monophosphatase family	G
COG0484	DnaJ-class molecular chaperone with C-terminal Zn finger domain	O
COG0484	DnaJ-class molecular chaperone with C-terminal Zn finger domain	O
COG0486	tRNA U34 5-carboxymethylaminomethyl modifying GTPase MnmE/TrmE	J
COG0488	ATPase components of ABC transporters with duplicated ATPase domains	R
COG0488	ATPase components of ABC transporters with duplicated ATPase domains	R
COG0488	ATPase components of ABC transporters with duplicated ATPase domains	R
COG0488	ATPase components of ABC transporters with duplicated ATPase domains	R
COG0488	ATPase components of ABC transporters with duplicated ATPase domains	R
COG0488	ATPase components of ABC transporters with duplicated ATPase domains	R
COG0488	ATPase components of ABC transporters with duplicated ATPase domains	R
COG0488	ATPase components of ABC transporters with duplicated ATPase domains	R
COG0488	ATPase components of ABC transporters with duplicated ATPase domains	R
COG0488	ATPase components of ABC transporters with duplicated ATPase domains	R
COG0489	Chromosome partitioning ATPase, Mrp family, contains Fe-S cluster	D
COG0489	Chromosome partitioning ATPase, Mrp family, contains Fe-S cluster	D
COG0490	K+/H+ antiporter YhaU, regulatory subunit KhtT	T P
COG0490	K+/H+ antiporter YhaU, regulatory subunit KhtT	T P
COG0490	K+/H+ antiporter YhaU, regulatory subunit KhtT	T P
COG0491	Glyoxylase or a related metal-dependent hydrolase, beta-lactamase superfamily II	R
COG0491	Glyoxylase or a related metal-dependent hydrolase, beta-lactamase superfamily II	R
COG0491	Glyoxylase or a related metal-dependent hydrolase, beta-lactamase superfamily II	R
COG0491	Glyoxylase or a related metal-dependent hydrolase, beta-lactamase superfamily II	R
COG0491	Glyoxylase or a related metal-dependent hydrolase, beta-lactamase superfamily II	R
COG0491	Glyoxylase or a related metal-dependent hydrolase, beta-lactamase superfamily II	R
COG0491	Glyoxylase or a related metal-dependent hydrolase, beta-lactamase superfamily II	R
COG0491	Glyoxylase or a related metal-dependent hydrolase, beta-lactamase superfamily II	R
COG0491	Glyoxylase or a related metal-dependent hydrolase, beta-lactamase superfamily II	R
COG0491	Glyoxylase or a related metal-dependent hydrolase, beta-lactamase superfamily II	R
COG0492	Thioredoxin reductase	O
COG0492	Thioredoxin reductase	O
COG0492	Thioredoxin reductase	O
COG0492	Thioredoxin reductase	O
COG0492	Thioredoxin reductase	O
COG0492	Thioredoxin reductase	O
COG0492	Thioredoxin reductase	O
COG0492	Thioredoxin reductase	O
COG0492	Thioredoxin reductase	O
COG0492	Thioredoxin reductase	O
COG0492	Thioredoxin reductase	O
COG0493	NADPH-dependent glutamate synthase beta chain or related oxidoreductase	E R
COG0493	NADPH-dependent glutamate synthase beta chain or related oxidoreductase	E R
COG0494	8-oxo-dGTP pyrophosphatase MutT and related house-cleaning NTP pyrophosphohydrolases, NUDIX family	V
COG0494	8-oxo-dGTP pyrophosphatase MutT and related house-cleaning NTP pyrophosphohydrolases, NUDIX family	V
COG0494	8-oxo-dGTP pyrophosphatase MutT and related house-cleaning NTP pyrophosphohydrolases, NUDIX family	V
COG0494	8-oxo-dGTP pyrophosphatase MutT and related house-cleaning NTP pyrophosphohydrolases, NUDIX family	V
COG0494	8-oxo-dGTP pyrophosphatase MutT and related house-cleaning NTP pyrophosphohydrolases, NUDIX family	V
COG0494	8-oxo-dGTP pyrophosphatase MutT and related house-cleaning NTP pyrophosphohydrolases, NUDIX family	V
COG0494	8-oxo-dGTP pyrophosphatase MutT and related house-cleaning NTP pyrophosphohydrolases, NUDIX family	V
COG0494	8-oxo-dGTP pyrophosphatase MutT and related house-cleaning NTP pyrophosphohydrolases, NUDIX family	V
COG0494	8-oxo-dGTP pyrophosphatase MutT and related house-cleaning NTP pyrophosphohydrolases, NUDIX family	V
COG0494	8-oxo-dGTP pyrophosphatase MutT and related house-cleaning NTP pyrophosphohydrolases, NUDIX family	V
COG0494	8-oxo-dGTP pyrophosphatase MutT and related house-cleaning NTP pyrophosphohydrolases, NUDIX family	V
COG0495	Leucyl-tRNA synthetase	J
COG0497	DNA repair ATPase RecN	L
COG0498	Threonine synthase	E
COG0499	S-adenosylhomocysteine hydrolase	H
COG0500	SAM-dependent methyltransferase	Q R
COG0500	SAM-dependent methyltransferase	Q R
COG0500	SAM-dependent methyltransferase	Q R
COG0500	SAM-dependent methyltransferase	Q R
COG0500	SAM-dependent methyltransferase	Q R
COG0500	SAM-dependent methyltransferase	Q R
COG0500	SAM-dependent methyltransferase	Q R
COG0500	SAM-dependent methyltransferase	Q R
COG0500	SAM-dependent methyltransferase	Q R
COG0500	SAM-dependent methyltransferase	Q R
COG0500	SAM-dependent methyltransferase	Q R
COG0500	SAM-dependent methyltransferase	Q R
COG0500	SAM-dependent methyltransferase	Q R
COG0500	SAM-dependent methyltransferase	Q R
COG0501	Zn-dependent protease with chaperone function	O
COG0503	Adenine/guanine phosphoribosyltransferase or related PRPP-binding protein	F
COG0503	Adenine/guanine phosphoribosyltransferase or related PRPP-binding protein	F
COG0503	Adenine/guanine phosphoribosyltransferase or related PRPP-binding protein	F
COG0503	Adenine/guanine phosphoribosyltransferase or related PRPP-binding protein	F
COG0504	CTP synthase (UTP-ammonia lyase)	F
COG0505	Carbamoylphosphate synthase small subunit	E F
COG0506	Proline dehydrogenase	E
COG0508	Pyruvate/2-oxoglutarate dehydrogenase complex, dihydrolipoamide acyltransferase (E2) component	C
COG0508	Pyruvate/2-oxoglutarate dehydrogenase complex, dihydrolipoamide acyltransferase (E2) component	C
COG0508	Pyruvate/2-oxoglutarate dehydrogenase complex, dihydrolipoamide acyltransferase (E2) component	C
COG0509	Glycine cleavage system H protein (lipoate-binding)	E
COG0510	Thiamine kinase and related kinases	H
COG0511	Biotin carboxyl carrier protein	I
COG0512	Anthranilate/para-aminobenzoate synthase component II	E H
COG0513	Superfamily II DNA and RNA helicase	L
COG0513	Superfamily II DNA and RNA helicase	L
COG0513	Superfamily II DNA and RNA helicase	L
COG0513	Superfamily II DNA and RNA helicase	L
COG0513	Superfamily II DNA and RNA helicase	L
COG0514	Superfamily II DNA helicase RecQ	L
COG0515	Serine/threonine protein kinase<<>>COG2815	T
COG0515	Serine/threonine protein kinase	T
COG0515	Serine/threonine protein kinase	T
COG0515	Serine/threonine protein kinase	T
COG0515	Serine/threonine protein kinase	T
COG0515	Serine/threonine protein kinase	T
COG0515	Serine/threonine protein kinase	T
COG0516	IMP dehydrogenase/GMP reductase	F
COG0517	CBS domain	T
COG0518	GMP synthase - Glutamine amidotransferase domain<<>>COG0519	F
COG0520	Selenocysteine lyase/Cysteine desulfurase	E
COG0520	Selenocysteine lyase/Cysteine desulfurase	E
COG0521	Molybdopterin biosynthesis enzyme MoaB	H
COG0521	Molybdopterin biosynthesis enzyme MoaB	H
COG0522	Ribosomal protein S4 or related protein	J
COG0523	GTPase, G3E family	R
COG0523	GTPase, G3E family	R
COG0523	GTPase, G3E family	R
COG0524	Sugar or nucleoside kinase, ribokinase family	G
COG0524	Sugar or nucleoside kinase, ribokinase family	G
COG0524	Sugar or nucleoside kinase, ribokinase family	G
COG0524	Sugar or nucleoside kinase, ribokinase family	G
COG0524	Sugar or nucleoside kinase, ribokinase family	G
COG0525	Valyl-tRNA synthetase	J
COG0526	Thiol-disulfide isomerase or thioredoxin	O
COG0526	Thiol-disulfide isomerase or thioredoxin	O
COG0526	Thiol-disulfide isomerase or thioredoxin	O
COG0526	Thiol-disulfide isomerase or thioredoxin	O
COG0526	Thiol-disulfide isomerase or thioredoxin	O
COG0526	Thiol-disulfide isomerase or thioredoxin	O
COG0527	Aspartokinase	E
COG0527	Aspartokinase	E
COG0528	Uridylate kinase	F
COG0529	Adenylylsulfate kinase or related kinase	P
COG0530	Ca2+/Na+ antiporter	P
COG0531	Amino acid transporter	E
COG0531	Amino acid transporter	E
COG0531	Amino acid transporter	E
COG0531	Amino acid transporter	E
COG0532	Translation initiation factor IF-2, a GTPase	J
COG0533	tRNA A37 threonylcarbamoyltransferase TsaD	J
COG0534	Na+-driven multidrug efflux pump	V
COG0534	Na+-driven multidrug efflux pump	V
COG0534	Na+-driven multidrug efflux pump	V
COG0534	Na+-driven multidrug efflux pump	V
COG0534	Na+-driven multidrug efflux pump	V
COG0535	Radical SAM superfamily enzyme, MoaA/NifB/PqqE/SkfB family	D H
COG0535	Radical SAM superfamily enzyme, MoaA/NifB/PqqE/SkfB family	D H
COG0535	Radical SAM superfamily enzyme, MoaA/NifB/PqqE/SkfB family	D H
COG0535	Radical SAM superfamily enzyme, MoaA/NifB/PqqE/SkfB family	D H
COG0535	Radical SAM superfamily enzyme, MoaA/NifB/PqqE/SkfB family	D H
COG0535	Radical SAM superfamily enzyme, MoaA/NifB/PqqE/SkfB family	D H
COG0536	GTPase involved in cell partioning and DNA repair	L D
COG0537	Diadenosine tetraphosphate (Ap4A) hydrolase or other HIT family hydrolase	F R
COG0537	Diadenosine tetraphosphate (Ap4A) hydrolase or other HIT family hydrolase	F R
COG0537	Diadenosine tetraphosphate (Ap4A) hydrolase or other HIT family hydrolase	F R
COG0538	Isocitrate dehydrogenase	C
COG0539	Ribosomal protein S1	J
COG0539	Ribosomal protein S1	J
COG0540	Aspartate carbamoyltransferase, catalytic chain	F
COG0541	Signal recognition particle GTPase	U
COG0542	ATP-dependent Clp protease ATP-binding subunit ClpA	O
COG0544	FKBP-type peptidyl-prolyl cis-trans isomerase (trigger factor)	O
COG0546	Phosphoglycolate phosphatase, HAD superfamily	C
COG0546	Phosphoglycolate phosphatase, HAD superfamily	C
COG0546	Phosphoglycolate phosphatase, HAD superfamily	C
COG0546	Phosphoglycolate phosphatase, HAD superfamily	C
COG0546	Phosphoglycolate phosphatase, HAD superfamily	C
COG0547	Anthranilate phosphoribosyltransferase	E
COG0547	Anthranilate phosphoribosyltransferase	E
COG0548	Acetylglutamate kinase	E
COG0550	DNA topoisomerase IA	L
COG0550	DNA topoisomerase IA	L
COG0552	Signal recognition particle GTPase	U
COG0553	Superfamily II DNA or RNA helicase, SNF2 family	K L
COG0553	Superfamily II DNA or RNA helicase, SNF2 family	K L
COG0553	Superfamily II DNA or RNA helicase, SNF2 family	K L
COG0554	Glycerol kinase	C
COG0555	ABC-type sulfate transport system, permease component	P
COG0555	ABC-type sulfate transport system, permease component	P
COG0556	Excinuclease UvrABC helicase subunit UvrB	L
COG0557	Exoribonuclease R	K
COG0558	Phosphatidylglycerophosphate synthase	I
COG0559	Branched-chain amino acid ABC-type transport system, permease component	E
COG0560	Phosphoserine phosphatase	E
COG0561	Hydroxymethylpyrimidine pyrophosphatase and other HAD family phosphatases	H R
COG0561	Hydroxymethylpyrimidine pyrophosphatase and other HAD family phosphatases	H R
COG0561	Hydroxymethylpyrimidine pyrophosphatase and other HAD family phosphatases	H R
COG0561	Hydroxymethylpyrimidine pyrophosphatase and other HAD family phosphatases	H R
COG0561	Hydroxymethylpyrimidine pyrophosphatase and other HAD family phosphatases	H R
COG0561	Hydroxymethylpyrimidine pyrophosphatase and other HAD family phosphatases	H R
COG0561	Hydroxymethylpyrimidine pyrophosphatase and other HAD family phosphatases	H R
COG0561	Hydroxymethylpyrimidine pyrophosphatase and other HAD family phosphatases	H R
COG0561	Hydroxymethylpyrimidine pyrophosphatase and other HAD family phosphatases	H R
COG0561	Hydroxymethylpyrimidine pyrophosphatase and other HAD family phosphatases	H R
COG0561	Hydroxymethylpyrimidine pyrophosphatase and other HAD family phosphatases	H R
COG0563	Adenylate kinase or related kinase	F
COG0563	Adenylate kinase or related kinase	F
COG0563	Adenylate kinase or related kinase	F
COG0564	Pseudouridylate synthase, 23S rRNA- or tRNA-specific	J
COG0564	Pseudouridylate synthase, 23S rRNA- or tRNA-specific	J
COG0564	Pseudouridylate synthase, 23S rRNA- or tRNA-specific	J
COG0564	Pseudouridylate synthase, 23S rRNA- or tRNA-specific	J
COG0564	Pseudouridylate synthase, 23S rRNA- or tRNA-specific	J
COG0566	tRNA G18 (ribose-2'-O)-methylase SpoU	J
COG0566	tRNA G18 (ribose-2'-O)-methylase SpoU	J
COG0567	2-oxoglutarate dehydrogenase complex, dehydrogenase (E1) component, and related enzymes	C
COG0568	DNA-directed RNA polymerase, sigma subunit (sigma70/sigma32)	K
COG0569	Trk K+ transport system, NAD-binding component	T P
COG0569	Trk K+ transport system, NAD-binding component	T P
COG0571	dsRNA-specific ribonuclease	K
COG0572	Uridine kinase	F
COG0573	ABC-type phosphate transport system, permease component	P
COG0573	ABC-type phosphate transport system, permease component	P
COG0574	Phosphoenolpyruvate synthase/pyruvate phosphate dikinase	G
COG0575	CDP-diglyceride synthetase	I
COG0575	CDP-diglyceride synthetase	I
COG0576	Molecular chaperone GrpE (heat shock protein)	O
COG0577	ABC-type antimicrobial peptide transport system, permease component	V
COG0577	ABC-type antimicrobial peptide transport system, permease component	V
COG0577	ABC-type antimicrobial peptide transport system, permease component	V
COG0577	ABC-type antimicrobial peptide transport system, permease component	V
COG0577	ABC-type antimicrobial peptide transport system, permease component	V
COG0577	ABC-type antimicrobial peptide transport system, permease component	V
COG0577	ABC-type antimicrobial peptide transport system, permease component	V
COG0577	ABC-type antimicrobial peptide transport system, permease component	V
COG0578	Glycerol-3-phosphate dehydrogenase	C
COG0579	L-2-hydroxyglutarate oxidase LhgO	G
COG0581	ABC-type phosphate transport system, permease component	P
COG0581	ABC-type phosphate transport system, permease component	P
COG0582	Integrase	L X
COG0582	Integrase	L X
COG0583	DNA-binding transcriptional regulator, LysR family	K
COG0583	DNA-binding transcriptional regulator, LysR family	K
COG0583	DNA-binding transcriptional regulator, LysR family	K
COG0583	DNA-binding transcriptional regulator, LysR family	K
COG0583	DNA-binding transcriptional regulator, LysR family	K
COG0583	DNA-binding transcriptional regulator, LysR family	K
COG0583	DNA-binding transcriptional regulator, LysR family	K
COG0583	DNA-binding transcriptional regulator, LysR family	K
COG0583	DNA-binding transcriptional regulator, LysR family	K
COG0583	DNA-binding transcriptional regulator, LysR family	K
COG0583	DNA-binding transcriptional regulator, LysR family	K
COG0583	DNA-binding transcriptional regulator, LysR family	K
COG0583	DNA-binding transcriptional regulator, LysR family	K
COG0583	DNA-binding transcriptional regulator, LysR family	K
COG0583	DNA-binding transcriptional regulator, LysR family	K
COG0583	DNA-binding transcriptional regulator, LysR family	K
COG0583	DNA-binding transcriptional regulator, LysR family	K
COG0583	DNA-binding transcriptional regulator, LysR family	K
COG0583	DNA-binding transcriptional regulator, LysR family	K
COG0583	DNA-binding transcriptional regulator, LysR family	K
COG0583	DNA-binding transcriptional regulator, LysR family	K
COG0583	DNA-binding transcriptional regulator, LysR family	K
COG0583	DNA-binding transcriptional regulator, LysR family	K
COG0583	DNA-binding transcriptional regulator, LysR family	K
COG0583	DNA-binding transcriptional regulator, LysR family	K
COG0584	Glycerophosphoryl diester phosphodiesterase	I
COG0584	Glycerophosphoryl diester phosphodiesterase	I
COG0584	Glycerophosphoryl diester phosphodiesterase	I
COG0586	Uncharacterized membrane protein DedA, SNARE-associated domain	M
COG0586	Uncharacterized membrane protein DedA, SNARE-associated domain	M
COG0586	Uncharacterized membrane protein DedA, SNARE-associated domain	M
COG0586	Uncharacterized membrane protein DedA, SNARE-associated domain	M
COG0586	Uncharacterized membrane protein DedA, SNARE-associated domain	M
COG0586	Uncharacterized membrane protein DedA, SNARE-associated domain	M
COG0586	Uncharacterized membrane protein DedA, SNARE-associated domain	M
COG0587	DNA polymerase III, alpha subunit	L
COG0588	Phosphoglycerate mutase (BPG-dependent)	G
COG0589	Nucleotide-binding universal stress protein, UspA family	T
COG0589	Nucleotide-binding universal stress protein, UspA family	T
COG0590	tRNA(Arg) A34 adenosine deaminase TadA	J
COG0590	tRNA(Arg) A34 adenosine deaminase TadA	J
COG0590	tRNA(Arg) A34 adenosine deaminase TadA	J
COG0592	DNA polymerase III sliding clamp (beta) subunit, PCNA homolog	L
COG0592	DNA polymerase III sliding clamp (beta) subunit, PCNA homolog	L
COG0593	Chromosomal replication initiation ATPase DnaA	L
COG0594	RNase P protein component	J
COG0595	mRNA degradation ribonuclease J1/J2	J
COG0595	mRNA degradation ribonuclease J1/J2	J
COG0596	Pimeloyl-ACP methyl ester carboxylesterase	H R
COG0596	Pimeloyl-ACP methyl ester carboxylesterase	H R
COG0596	Pimeloyl-ACP methyl ester carboxylesterase	H R
COG0596	Pimeloyl-ACP methyl ester carboxylesterase	H R
COG0596	Pimeloyl-ACP methyl ester carboxylesterase	H R
COG0596	Pimeloyl-ACP methyl ester carboxylesterase	H R
COG0596	Pimeloyl-ACP methyl ester carboxylesterase	H R
COG0596	Pimeloyl-ACP methyl ester carboxylesterase	H R
COG0596	Pimeloyl-ACP methyl ester carboxylesterase	H R
COG0596	Pimeloyl-ACP methyl ester carboxylesterase	H R
COG0596	Pimeloyl-ACP methyl ester carboxylesterase	H R
COG0596	Pimeloyl-ACP methyl ester carboxylesterase	H R
COG0596	Pimeloyl-ACP methyl ester carboxylesterase	H R
COG0596	Pimeloyl-ACP methyl ester carboxylesterase	H R
COG0596	Pimeloyl-ACP methyl ester carboxylesterase	H R
COG0596	Pimeloyl-ACP methyl ester carboxylesterase	H R
COG0596	Pimeloyl-ACP methyl ester carboxylesterase	H R
COG0596	Pimeloyl-ACP methyl ester carboxylesterase	H R
COG0596	Pimeloyl-ACP methyl ester carboxylesterase	H R
COG0596	Pimeloyl-ACP methyl ester carboxylesterase	H R
COG0596	Pimeloyl-ACP methyl ester carboxylesterase	H R
COG0596	Pimeloyl-ACP methyl ester carboxylesterase	H R
COG0596	Pimeloyl-ACP methyl ester carboxylesterase	H R
COG0597	Lipoprotein signal peptidase	M U
COG0597	Lipoprotein signal peptidase	M U
COG0598	Mg2+ and Co2+ transporter CorA	P
COG0598	Mg2+ and Co2+ transporter CorA	P
COG0598	Mg2+ and Co2+ transporter CorA	P
COG0598	Mg2+ and Co2+ transporter CorA	P
COG0599	Uncharacterized conserved protein YurZ, alkylhydroperoxidase/carboxymuconolactone decarboxylase family	R
COG0599	Uncharacterized conserved protein YurZ, alkylhydroperoxidase/carboxymuconolactone decarboxylase family	R
COG0599	Uncharacterized conserved protein YurZ, alkylhydroperoxidase/carboxymuconolactone decarboxylase family	R
COG0600	ABC-type nitrate/sulfonate/bicarbonate transport system, permease component	P
COG0600	ABC-type nitrate/sulfonate/bicarbonate transport system, permease component	P
COG0600	ABC-type nitrate/sulfonate/bicarbonate transport system, permease component	P
COG0600	ABC-type nitrate/sulfonate/bicarbonate transport system, permease component	P
COG0600	ABC-type nitrate/sulfonate/bicarbonate transport system, permease component	P
COG0600	ABC-type nitrate/sulfonate/bicarbonate transport system, permease component	P
COG0600	ABC-type nitrate/sulfonate/bicarbonate transport system, permease component	P
COG0601	ABC-type dipeptide/oligopeptide/nickel transport system, permease component	E P
COG0601	ABC-type dipeptide/oligopeptide/nickel transport system, permease component	E P
COG0601	ABC-type dipeptide/oligopeptide/nickel transport system, permease component	E P
COG0601	ABC-type dipeptide/oligopeptide/nickel transport system, permease component	E P
COG0601	ABC-type dipeptide/oligopeptide/nickel transport system, permease component	E P
COG0601	ABC-type dipeptide/oligopeptide/nickel transport system, permease component	E P
COG0601	ABC-type dipeptide/oligopeptide/nickel transport system, permease component	E P
COG0601	ABC-type dipeptide/oligopeptide/nickel transport system, permease component	E P
COG0601	ABC-type dipeptide/oligopeptide/nickel transport system, permease component	E P
COG0601	ABC-type dipeptide/oligopeptide/nickel transport system, permease component	E P
COG0601	ABC-type dipeptide/oligopeptide/nickel transport system, permease component	E P
COG0601	ABC-type dipeptide/oligopeptide/nickel transport system, permease component	E P
COG0601	ABC-type dipeptide/oligopeptide/nickel transport system, permease component	E P
COG0601	ABC-type dipeptide/oligopeptide/nickel transport system, permease component	E P
COG0602	Organic radical activating enzyme	H
COG0602	Organic radical activating enzyme	H
COG0602	Organic radical activating enzyme	H
COG0603	7-cyano-7-deazaguanine synthase (queuosine biosynthesis)	J
COG0603	7-cyano-7-deazaguanine synthase (queuosine biosynthesis)	J
COG0604	NADPH:quinone reductase or related Zn-dependent oxidoreductase	C R
COG0604	NADPH:quinone reductase or related Zn-dependent oxidoreductase	C R
COG0604	NADPH:quinone reductase or related Zn-dependent oxidoreductase	C R
COG0604	NADPH:quinone reductase or related Zn-dependent oxidoreductase	C R
COG0604	NADPH:quinone reductase or related Zn-dependent oxidoreductase	C R
COG0604	NADPH:quinone reductase or related Zn-dependent oxidoreductase	C R
COG0604	NADPH:quinone reductase or related Zn-dependent oxidoreductase	C R
COG0604	NADPH:quinone reductase or related Zn-dependent oxidoreductase	C R
COG0605	Superoxide dismutase	P
COG0605	Superoxide dismutase	P
COG0605	Superoxide dismutase	P
COG0606	Predicted ATPase with chaperone activity	O
COG0607	Rhodanese-related sulfurtransferase	P
COG0607	Rhodanese-related sulfurtransferase	P
COG0607	Rhodanese-related sulfurtransferase	P
COG0607	Rhodanese-related sulfurtransferase	P
COG0607	Rhodanese-related sulfurtransferase	P
COG0608	Single-stranded DNA-specific exonuclease, DHH superfamily, may be involved in archaeal DNA replication intiation<<>>COG4199	L
COG0609	ABC-type Fe3+-siderophore transport system, permease component	P
COG0609	ABC-type Fe3+-siderophore transport system, permease component	P
COG0609	ABC-type Fe3+-siderophore transport system, permease component	P
COG0609	ABC-type Fe3+-siderophore transport system, permease component	P
COG0609	ABC-type Fe3+-siderophore transport system, permease component	P
COG0609	ABC-type Fe3+-siderophore transport system, permease component	P
COG0609	ABC-type Fe3+-siderophore transport system, permease component	P
COG0609	ABC-type Fe3+-siderophore transport system, permease component	P
COG0609	ABC-type Fe3+-siderophore transport system, permease component	P
COG0609	ABC-type Fe3+-siderophore transport system, permease component	P
COG0609	ABC-type Fe3+-siderophore transport system, permease component	P
COG0612	Predicted Zn-dependent peptidase	R
COG0612	Predicted Zn-dependent peptidase	R
COG0612	Predicted Zn-dependent peptidase	R
COG0612	Predicted Zn-dependent peptidase	R
COG0612	Predicted Zn-dependent peptidase	R
COG0613	Predicted metal-dependent phosphoesterase TrpH, contains PHP domain	F
COG0614	ABC-type Fe3+-hydroxamate transport system, periplasmic component<<>>COG2207	P
COG0614	ABC-type Fe3+-hydroxamate transport system, periplasmic component<<>>COG2207	P
COG0614	ABC-type Fe3+-hydroxamate transport system, periplasmic component	P
COG0614	ABC-type Fe3+-hydroxamate transport system, periplasmic component	P
COG0614	ABC-type Fe3+-hydroxamate transport system, periplasmic component	P
COG0614	ABC-type Fe3+-hydroxamate transport system, periplasmic component	P
COG0614	ABC-type Fe3+-hydroxamate transport system, periplasmic component	P
COG0614	ABC-type Fe3+-hydroxamate transport system, periplasmic component	P
COG0614	ABC-type Fe3+-hydroxamate transport system, periplasmic component	P
COG0614	ABC-type Fe3+-hydroxamate transport system, periplasmic component	P
COG0614	ABC-type Fe3+-hydroxamate transport system, periplasmic component	P
COG0614	ABC-type Fe3+-hydroxamate transport system, periplasmic component<<>>COG2207	P
COG0614	ABC-type Fe3+-hydroxamate transport system, periplasmic component	P
COG0614	ABC-type Fe3+-hydroxamate transport system, periplasmic component	P
COG0614	ABC-type Fe3+-hydroxamate transport system, periplasmic component	P
COG0614	ABC-type Fe3+-hydroxamate transport system, periplasmic component	P
COG0614	ABC-type Fe3+-hydroxamate transport system, periplasmic component	P
COG0614	ABC-type Fe3+-hydroxamate transport system, periplasmic component	P
COG0614	ABC-type Fe3+-hydroxamate transport system, periplasmic component	P
COG0614	ABC-type Fe3+-hydroxamate transport system, periplasmic component	P
COG0614	ABC-type Fe3+-hydroxamate transport system, periplasmic component	P
COG0614	ABC-type Fe3+-hydroxamate transport system, periplasmic component	P
COG0614	ABC-type Fe3+-hydroxamate transport system, periplasmic component	P
COG0614	ABC-type Fe3+-hydroxamate transport system, periplasmic component	P
COG0614	ABC-type Fe3+-hydroxamate transport system, periplasmic component<<>>COG2207	P
COG0614	ABC-type Fe3+-hydroxamate transport system, periplasmic component	P
COG0614	ABC-type Fe3+-hydroxamate transport system, periplasmic component	P
COG0614	ABC-type Fe3+-hydroxamate transport system, periplasmic component	P
COG0614	ABC-type Fe3+-hydroxamate transport system, periplasmic component	P
COG0614	ABC-type Fe3+-hydroxamate transport system, periplasmic component<<>>COG2207	P
COG0617	tRNA nucleotidyltransferase/poly(A) polymerase	J
COG0618	nanoRNase/pAp phosphatase, hydrolyzes c-di-AMP and oligoRNAs	T F
COG0619	Energy-coupling factor transporter transmembrane protein EcfT	H
COG0619	Energy-coupling factor transporter transmembrane protein EcfT<<>>COG1122	H
COG0620	Methionine synthase II (cobalamin-independent)	E
COG0620	Methionine synthase II (cobalamin-independent)	E
COG0620	Methionine synthase II (cobalamin-independent)	E
COG0621	tRNA A37 methylthiotransferase MiaB	J
COG0621	tRNA A37 methylthiotransferase MiaB	J
COG0622	Predicted phosphodiesterase	R
COG0622	Predicted phosphodiesterase	R
COG0622	Predicted phosphodiesterase	R
COG0622	Predicted phosphodiesterase	R
COG0622	Predicted phosphodiesterase	R
COG0622	Predicted phosphodiesterase	R
COG0624	Acetylornithine deacetylase/Succinyl-diaminopimelate desuccinylase or related deacylase	E
COG0624	Acetylornithine deacetylase/Succinyl-diaminopimelate desuccinylase or related deacylase	E
COG0624	Acetylornithine deacetylase/Succinyl-diaminopimelate desuccinylase or related deacylase	E
COG0626	Cystathionine beta-lyase/cystathionine gamma-synthase	E
COG0626	Cystathionine beta-lyase/cystathionine gamma-synthase	E
COG0626	Cystathionine beta-lyase/cystathionine gamma-synthase	E
COG0627	S-formylglutathione hydrolase FrmB	V
COG0627	S-formylglutathione hydrolase FrmB	V
COG0627	S-formylglutathione hydrolase FrmB	V
COG0628	Predicted PurR-regulated permease PerM	R
COG0628	Predicted PurR-regulated permease PerM	R
COG0628	Predicted PurR-regulated permease PerM	R
COG0628	Predicted PurR-regulated permease PerM	R
COG0628	Predicted PurR-regulated permease PerM	R
COG0628	Predicted PurR-regulated permease PerM	R
COG0628	Predicted PurR-regulated permease PerM	R
COG0629	Single-stranded DNA-binding protein	L
COG0631	Serine/threonine protein phosphatase PrpC	T
COG0631	Serine/threonine protein phosphatase PrpC	T
COG0631	Serine/threonine protein phosphatase PrpC	T
COG0631	Serine/threonine protein phosphatase PrpC	T
COG0632	Holliday junction resolvasome RuvABC DNA-binding subunit	L
COG0634	Hypoxanthine-guanine phosphoribosyltransferase	F
COG0635	Coproporphyrinogen III oxidase or related Fe-S oxidoreductase	H
COG0635	Coproporphyrinogen III oxidase or related Fe-S oxidoreductase	H
COG0635	Coproporphyrinogen III oxidase or related Fe-S oxidoreductase	H
COG0636	FoF1-type ATP synthase, membrane subunit c/Archaeal/vacuolar-type H+-ATPase, subunit K	C
COG0637	Beta-phosphoglucomutase or related phosphatase, HAD superfamily	G
COG0637	Beta-phosphoglucomutase or related phosphatase, HAD superfamily	G
COG0637	Beta-phosphoglucomutase or related phosphatase, HAD superfamily	G
COG0640	DNA-binding transcriptional regulator, ArsR family	K
COG0640	DNA-binding transcriptional regulator, ArsR family	K
COG0640	DNA-binding transcriptional regulator, ArsR family	K
COG0640	DNA-binding transcriptional regulator, ArsR family	K
COG0640	DNA-binding transcriptional regulator, ArsR family	K
COG0640	DNA-binding transcriptional regulator, ArsR family	K
COG0640	DNA-binding transcriptional regulator, ArsR family	K
COG0640	DNA-binding transcriptional regulator, ArsR family	K
COG0640	DNA-binding transcriptional regulator, ArsR family	K
COG0640	DNA-binding transcriptional regulator, ArsR family	K
COG0640	DNA-binding transcriptional regulator, ArsR family	K
COG0640	DNA-binding transcriptional regulator, ArsR family	K
COG0640	DNA-binding transcriptional regulator, ArsR family	K
COG0642	Signal transduction histidine kinase	T
COG0642	Signal transduction histidine kinase	T
COG0642	Signal transduction histidine kinase	T
COG0642	Signal transduction histidine kinase	T
COG0642	Signal transduction histidine kinase	T
COG0642	Signal transduction histidine kinase	T
COG0642	Signal transduction histidine kinase	T
COG0642	Signal transduction histidine kinase	T
COG0642	Signal transduction histidine kinase<<>>COG3763	T
COG0642	Signal transduction histidine kinase	T
COG0642	Signal transduction histidine kinase	T
COG0642	Signal transduction histidine kinase	T
COG0642	Signal transduction histidine kinase<<>>COG0784	T
COG0642	Signal transduction histidine kinase<<>>COG3847	T
COG0642	Signal transduction histidine kinase	T
COG0642	Signal transduction histidine kinase	T
COG0642	Signal transduction histidine kinase	T
COG0642	Signal transduction histidine kinase	T
COG0642	Signal transduction histidine kinase	T
COG0642	Signal transduction histidine kinase	T
COG0642	Signal transduction histidine kinase	T
COG0642	Signal transduction histidine kinase	T
COG0642	Signal transduction histidine kinase	T
COG0642	Signal transduction histidine kinase	T
COG0642	Signal transduction histidine kinase	T
COG0642	Signal transduction histidine kinase	T
COG0642	Signal transduction histidine kinase<<>>COG4567	T
COG0642	Signal transduction histidine kinase	T
COG0642	Signal transduction histidine kinase	T
COG0642	Signal transduction histidine kinase	T
COG0642	Signal transduction histidine kinase	T
COG0642	Signal transduction histidine kinase	T
COG0642	Signal transduction histidine kinase	T
COG0642	Signal transduction histidine kinase	T
COG0642	Signal transduction histidine kinase	T
COG0642	Signal transduction histidine kinase<<>>COG2197	T
COG0642	Signal transduction histidine kinase	T
COG0642	Signal transduction histidine kinase	T
COG0642	Signal transduction histidine kinase	T
COG0642	Signal transduction histidine kinase	T
COG0642	Signal transduction histidine kinase	T
COG0642	Signal transduction histidine kinase	T
COG0642	Signal transduction histidine kinase	T
COG0642	Signal transduction histidine kinase	T
COG0642	Signal transduction histidine kinase	T
COG0642	Signal transduction histidine kinase	T
COG0642	Signal transduction histidine kinase	T
COG0642	Signal transduction histidine kinase	T
COG0642	Signal transduction histidine kinase	T
COG0642	Signal transduction histidine kinase	T
COG0642	Signal transduction histidine kinase	T
COG0642	Signal transduction histidine kinase	T
COG0643	Chemotaxis protein histidine kinase CheA	T
COG0643	Chemotaxis protein histidine kinase CheA	T
COG0644	Dehydrogenase (flavoprotein)	C
COG0645	Predicted kinase	R
COG0645	Predicted kinase	R
COG0646	Methionine synthase I (cobalamin-dependent), methyltransferase domain<<>>COG0685	E
COG0647	Ribonucleotide monophosphatase NagD, HAD superfamily	F
COG0647	Ribonucleotide monophosphatase NagD, HAD superfamily	F
COG0648	Endonuclease IV	L
COG0648	Endonuclease IV	L
COG0651	Formate hydrogenlyase subunit 3/Multisubunit Na+/H+ antiporter, MnhD subunit	C P
COG0652	Peptidyl-prolyl cis-trans isomerase (rotamase) - cyclophilin family	O
COG0652	Peptidyl-prolyl cis-trans isomerase (rotamase) - cyclophilin family	O
COG0653	Preprotein translocase subunit SecA (ATPase, RNA helicase)	U
COG0653	Preprotein translocase subunit SecA (ATPase, RNA helicase)	U
COG0654	2-polyprenyl-6-methoxyphenol hydroxylase and related FAD-dependent oxidoreductases	C H
COG0654	2-polyprenyl-6-methoxyphenol hydroxylase and related FAD-dependent oxidoreductases	C H
COG0654	2-polyprenyl-6-methoxyphenol hydroxylase and related FAD-dependent oxidoreductases	C H
COG0656	Aldo/keto reductase, related to diketogulonate reductase	Q
COG0656	Aldo/keto reductase, related to diketogulonate reductase	Q
COG0656	Aldo/keto reductase, related to diketogulonate reductase	Q
COG0656	Aldo/keto reductase, related to diketogulonate reductase	Q
COG0656	Aldo/keto reductase, related to diketogulonate reductase	Q
COG0656	Aldo/keto reductase, related to diketogulonate reductase	Q
COG0656	Aldo/keto reductase, related to diketogulonate reductase	Q
COG0657	Acetyl esterase/lipase	I
COG0657	Acetyl esterase/lipase	I
COG0657	Acetyl esterase/lipase	I
COG0657	Acetyl esterase/lipase	I
COG0657	Acetyl esterase/lipase	I
COG0659	Sulfate permease or related transporter, MFS superfamily	P
COG0659	Sulfate permease or related transporter, MFS superfamily	P
COG0661	Predicted unusual protein kinase regulating ubiquinone biosynthesis, AarF/ABC1/UbiB family	T H
COG0662	Mannose-6-phosphate isomerase, cupin superfamily	G
COG0662	Mannose-6-phosphate isomerase, cupin superfamily	G
COG0662	Mannose-6-phosphate isomerase, cupin superfamily	G
COG0662	Mannose-6-phosphate isomerase, cupin superfamily<<>>COG2207	G
COG0662	Mannose-6-phosphate isomerase, cupin superfamily<<>>COG2207	G
COG0663	Carbonic anhydrase or acetyltransferase, isoleucine patch superfamily	R
COG0664	cAMP-binding domain of CRP or a regulatory subunit of cAMP-dependent protein kinases	T
COG0664	cAMP-binding domain of CRP or a regulatory subunit of cAMP-dependent protein kinases	T
COG0664	cAMP-binding domain of CRP or a regulatory subunit of cAMP-dependent protein kinases	T
COG0664	cAMP-binding domain of CRP or a regulatory subunit of cAMP-dependent protein kinases	T
COG0664	cAMP-binding domain of CRP or a regulatory subunit of cAMP-dependent protein kinases	T
COG0664	cAMP-binding domain of CRP or a regulatory subunit of cAMP-dependent protein kinases	T
COG0664	cAMP-binding domain of CRP or a regulatory subunit of cAMP-dependent protein kinases	T
COG0665	Glycine/D-amino acid oxidase (deaminating)	E
COG0665	Glycine/D-amino acid oxidase (deaminating)	E
COG0665	Glycine/D-amino acid oxidase (deaminating)	E
COG0665	Glycine/D-amino acid oxidase (deaminating)	E
COG0665	Glycine/D-amino acid oxidase (deaminating)<<>>COG2146	E
COG0666	Ankyrin repeat	T
COG0666	Ankyrin repeat	T
COG0666	Ankyrin repeat	T
COG0667	Predicted oxidoreductase (related to aryl-alcohol dehydrogenase)	H R
COG0667	Predicted oxidoreductase (related to aryl-alcohol dehydrogenase)	H R
COG0667	Predicted oxidoreductase (related to aryl-alcohol dehydrogenase)	H R
COG0667	Predicted oxidoreductase (related to aryl-alcohol dehydrogenase)	H R
COG0667	Predicted oxidoreductase (related to aryl-alcohol dehydrogenase)	H R
COG0667	Predicted oxidoreductase (related to aryl-alcohol dehydrogenase)	H R
COG0667	Predicted oxidoreductase (related to aryl-alcohol dehydrogenase)	H R
COG0667	Predicted oxidoreductase (related to aryl-alcohol dehydrogenase)	H R
COG0667	Predicted oxidoreductase (related to aryl-alcohol dehydrogenase)	H R
COG0667	Predicted oxidoreductase (related to aryl-alcohol dehydrogenase)	H R
COG0667	Predicted oxidoreductase (related to aryl-alcohol dehydrogenase)	H R
COG0667	Predicted oxidoreductase (related to aryl-alcohol dehydrogenase)	H R
COG0668	Small-conductance mechanosensitive channel	M
COG0668	Small-conductance mechanosensitive channel	M
COG0669	Phosphopantetheine adenylyltransferase	H
COG0671	Membrane-associated phospholipid phosphatase	I
COG0671	Membrane-associated phospholipid phosphatase	I
COG0671	Membrane-associated phospholipid phosphatase	I
COG0671	Membrane-associated phospholipid phosphatase	I
COG0671	Membrane-associated phospholipid phosphatase	I
COG0672	High-affinity Fe2+/Pb2+ permease	P
COG0673	Predicted dehydrogenase	R
COG0673	Predicted dehydrogenase	R
COG0673	Predicted dehydrogenase	R
COG0673	Predicted dehydrogenase	R
COG0673	Predicted dehydrogenase	R
COG0673	Predicted dehydrogenase	R
COG0673	Predicted dehydrogenase	R
COG0673	Predicted dehydrogenase	R
COG0673	Predicted dehydrogenase	R
COG0673	Predicted dehydrogenase	R
COG0673	Predicted dehydrogenase	R
COG0673	Predicted dehydrogenase	R
COG0673	Predicted dehydrogenase	R
COG0673	Predicted dehydrogenase	R
COG0673	Predicted dehydrogenase	R
COG0673	Predicted dehydrogenase	R
COG0673	Predicted dehydrogenase	R
COG0673	Predicted dehydrogenase	R
COG0673	Predicted dehydrogenase	R
COG0673	Predicted dehydrogenase	R
COG0673	Predicted dehydrogenase	R
COG0673	Predicted dehydrogenase	R
COG0673	Predicted dehydrogenase	R
COG0675	Transposase	X
COG0675	Transposase	X
COG0677	UDP-N-acetyl-D-mannosaminuronate dehydrogenase	M
COG0677	UDP-N-acetyl-D-mannosaminuronate dehydrogenase	M
COG0679	Predicted permease	R
COG0679	Predicted permease	R
COG0681	Signal peptidase I	U
COG0681	Signal peptidase I	U
COG0682	Prolipoprotein diacylglyceryltransferase	M
COG0683	ABC-type branched-chain amino acid transport system, periplasmic component	E
COG0683	ABC-type branched-chain amino acid transport system, periplasmic component	E
COG0686	Alanine dehydrogenase	E
COG0687	Spermidine/putrescine-binding periplasmic protein	E
COG0687	Spermidine/putrescine-binding periplasmic protein	E
COG0687	Spermidine/putrescine-binding periplasmic protein	E
COG0688	Phosphatidylserine decarboxylase	I
COG0689	Ribonuclease PH	J
COG0690	Preprotein translocase subunit SecE	U
COG0691	tmRNA-binding protein	O
COG0692	Uracil DNA glycosylase	L
COG0693	Putative intracellular protease/amidase	V
COG0693	Putative intracellular protease/amidase	V
COG0693	Putative intracellular protease/amidase	V
COG0693	Putative intracellular protease/amidase	V
COG0694	Fe-S cluster biogenesis protein NfuA, 4Fe-4S-binding domain	O
COG0695	Glutaredoxin	O
COG0695	Glutaredoxin	O
COG0696	Phosphoglycerate mutase (BPG-independent, AlkP superfamily)	G
COG0697	Permease of the drug/metabolite transporter (DMT) superfamily	G E R
COG0697	Permease of the drug/metabolite transporter (DMT) superfamily	G E R
COG0697	Permease of the drug/metabolite transporter (DMT) superfamily	G E R
COG0697	Permease of the drug/metabolite transporter (DMT) superfamily	G E R
COG0697	Permease of the drug/metabolite transporter (DMT) superfamily	G E R
COG0697	Permease of the drug/metabolite transporter (DMT) superfamily	G E R
COG0697	Permease of the drug/metabolite transporter (DMT) superfamily	G E R
COG0697	Permease of the drug/metabolite transporter (DMT) superfamily	G E R
COG0697	Permease of the drug/metabolite transporter (DMT) superfamily	G E R
COG0697	Permease of the drug/metabolite transporter (DMT) superfamily	G E R
COG0697	Permease of the drug/metabolite transporter (DMT) superfamily	G E R
COG0697	Permease of the drug/metabolite transporter (DMT) superfamily	G E R
COG0700	Spore maturation protein SpmB (function unknown)	S
COG0701	Uncharacterized membrane protein YraQ, UPF0718 family	S
COG0702	Uncharacterized conserved protein YbjT, contains NAD(P)-binding and DUF2867 domains	R
COG0702	Uncharacterized conserved protein YbjT, contains NAD(P)-binding and DUF2867 domains	R
COG0702	Uncharacterized conserved protein YbjT, contains NAD(P)-binding and DUF2867 domains	R
COG0702	Uncharacterized conserved protein YbjT, contains NAD(P)-binding and DUF2867 domains	R
COG0702	Uncharacterized conserved protein YbjT, contains NAD(P)-binding and DUF2867 domains	R
COG0703	Shikimate kinase	E
COG0704	Phosphate uptake regulator	P
COG0705	Membrane associated serine protease, rhomboid family	O
COG0706	Membrane protein insertase Oxa1/YidC/SpoIIIJ, required for the localization of integral membrane proteins	M
COG0706	Membrane protein insertase Oxa1/YidC/SpoIIIJ, required for the localization of integral membrane proteins	M
COG0707	UDP-N-acetylglucosamine:LPS N-acetylglucosamine transferase	M
COG0707	UDP-N-acetylglucosamine:LPS N-acetylglucosamine transferase	M
COG0707	UDP-N-acetylglucosamine:LPS N-acetylglucosamine transferase	M
COG0708	Exonuclease III	L
COG0711	FoF1-type ATP synthase, membrane subunit b or b'	C
COG0712	FoF1-type ATP synthase, delta subunit	C
COG0714	MoxR-like ATPase	R
COG0714	MoxR-like ATPase	R
COG0714	MoxR-like ATPase	R
COG0714	MoxR-like ATPase	R
COG0715	ABC-type nitrate/sulfonate/bicarbonate transport system, periplasmic component	P
COG0715	ABC-type nitrate/sulfonate/bicarbonate transport system, periplasmic component	P
COG0715	ABC-type nitrate/sulfonate/bicarbonate transport system, periplasmic component	P
COG0715	ABC-type nitrate/sulfonate/bicarbonate transport system, periplasmic component	P
COG0715	ABC-type nitrate/sulfonate/bicarbonate transport system, periplasmic component	P
COG0715	ABC-type nitrate/sulfonate/bicarbonate transport system, periplasmic component	P
COG0716	Flavodoxin	C
COG0718	Conserved DNA-binding protein YbaB (function unknown)	K
COG0719	Fe-S cluster assembly scaffold protein SufB	O
COG0719	Fe-S cluster assembly scaffold protein SufB	O
COG0720	6-pyruvoyl-tetrahydropterin synthase	H
COG0720	6-pyruvoyl-tetrahydropterin synthase	H
COG0721	Asp-tRNAAsn/Glu-tRNAGln amidotransferase C subunit	J
COG0723	Rieske Fe-S protein	C
COG0723	Rieske Fe-S protein	C
COG0723	Rieske Fe-S protein	C
COG0723	Rieske Fe-S protein	C
COG0723	Rieske Fe-S protein	C
COG0725	ABC-type molybdate transport system, periplasmic component	P
COG0726	Peptidoglycan/xylan/chitin deacetylase, PgdA/CDA1 family	M G
COG0726	Peptidoglycan/xylan/chitin deacetylase, PgdA/CDA1 family	M G
COG0726	Peptidoglycan/xylan/chitin deacetylase, PgdA/CDA1 family	M G
COG0726	Peptidoglycan/xylan/chitin deacetylase, PgdA/CDA1 family	M G
COG0726	Peptidoglycan/xylan/chitin deacetylase, PgdA/CDA1 family	M G
COG0726	Peptidoglycan/xylan/chitin deacetylase, PgdA/CDA1 family	M G
COG0726	Peptidoglycan/xylan/chitin deacetylase, PgdA/CDA1 family	M G
COG0726	Peptidoglycan/xylan/chitin deacetylase, PgdA/CDA1 family	M G
COG0726	Peptidoglycan/xylan/chitin deacetylase, PgdA/CDA1 family	M G
COG0726	Peptidoglycan/xylan/chitin deacetylase, PgdA/CDA1 family	M G
COG0726	Peptidoglycan/xylan/chitin deacetylase, PgdA/CDA1 family	M G
COG0726	Peptidoglycan/xylan/chitin deacetylase, PgdA/CDA1 family	M G
COG0726	Peptidoglycan/xylan/chitin deacetylase, PgdA/CDA1 family	M G
COG0726	Peptidoglycan/xylan/chitin deacetylase, PgdA/CDA1 family	M G
COG0726	Peptidoglycan/xylan/chitin deacetylase, PgdA/CDA1 family	M G
COG0727	Fe-S-cluster containining protein	R
COG0730	Uncharacterized membrane protein YfcA	P
COG0730	Uncharacterized membrane protein YfcA	P
COG0732	Restriction endonuclease S subunit	V
COG0733	Na+-dependent transporter, SNF family	R
COG0735	Fe2+ or Zn2+ uptake regulation protein	P
COG0735	Fe2+ or Zn2+ uptake regulation protein	P
COG0735	Fe2+ or Zn2+ uptake regulation protein	P
COG0735	Fe2+ or Zn2+ uptake regulation protein	P
COG0735	Fe2+ or Zn2+ uptake regulation protein	P
COG0736	Phosphopantetheinyl transferase (holo-ACP synthase)	I
COG0737	2',3'-cyclic-nucleotide 2'-phosphodiesterase/5'- or 3'-nucleotidase, 5'-nucleotidase family	V F
COG0737	2',3'-cyclic-nucleotide 2'-phosphodiesterase/5'- or 3'-nucleotidase, 5'-nucleotidase family	V F
COG0737	2',3'-cyclic-nucleotide 2'-phosphodiesterase/5'- or 3'-nucleotidase, 5'-nucleotidase family	V F
COG0737	2',3'-cyclic-nucleotide 2'-phosphodiesterase/5'- or 3'-nucleotidase, 5'-nucleotidase family	V F
COG0737	2',3'-cyclic-nucleotide 2'-phosphodiesterase/5'- or 3'-nucleotidase, 5'-nucleotidase family	V F
COG0737	2',3'-cyclic-nucleotide 2'-phosphodiesterase/5'- or 3'-nucleotidase, 5'-nucleotidase family	V F
COG0737	2',3'-cyclic-nucleotide 2'-phosphodiesterase/5'- or 3'-nucleotidase, 5'-nucleotidase family	V F
COG0738	Fucose permease	G
COG0738	Fucose permease	G
COG0738	Fucose permease	G
COG0739	Murein DD-endopeptidase MepM and murein hydrolase activator NlpD, contain LysM domain	M
COG0739	Murein DD-endopeptidase MepM and murein hydrolase activator NlpD, contain LysM domain	M
COG0739	Murein DD-endopeptidase MepM and murein hydrolase activator NlpD, contain LysM domain	M
COG0739	Murein DD-endopeptidase MepM and murein hydrolase activator NlpD, contain LysM domain	M
COG0739	Murein DD-endopeptidase MepM and murein hydrolase activator NlpD, contain LysM domain	M
COG0739	Murein DD-endopeptidase MepM and murein hydrolase activator NlpD, contain LysM domain	M
COG0739	Murein DD-endopeptidase MepM and murein hydrolase activator NlpD, contain LysM domain	M
COG0739	Murein DD-endopeptidase MepM and murein hydrolase activator NlpD, contain LysM domain	M
COG0739	Murein DD-endopeptidase MepM and murein hydrolase activator NlpD, contain LysM domain	M
COG0740	ATP-dependent protease ClpP, protease subunit	O
COG0740	ATP-dependent protease ClpP, protease subunit	O
COG0740	ATP-dependent protease ClpP, protease subunit	O
COG0740	ATP-dependent protease ClpP, protease subunit	O
COG0741	Soluble lytic murein transglycosylase and related regulatory proteins (some contain LysM/invasin domains)	M
COG0741	Soluble lytic murein transglycosylase and related regulatory proteins (some contain LysM/invasin domains)	M
COG0741	Soluble lytic murein transglycosylase and related regulatory proteins (some contain LysM/invasin domains)	M
COG0741	Soluble lytic murein transglycosylase and related regulatory proteins (some contain LysM/invasin domains)	M
COG0742	16S rRNA G966 N2-methylase RsmD	J
COG0743	1-deoxy-D-xylulose 5-phosphate reductoisomerase	I
COG0744	Membrane carboxypeptidase (penicillin-binding protein)	M
COG0744	Membrane carboxypeptidase (penicillin-binding protein)	M
COG0744	Membrane carboxypeptidase (penicillin-binding protein)	M
COG0744	Membrane carboxypeptidase (penicillin-binding protein)	M
COG0745	DNA-binding response regulator, OmpR family, contains REC and winged-helix (wHTH) domain	K T
COG0745	DNA-binding response regulator, OmpR family, contains REC and winged-helix (wHTH) domain	K T
COG0745	DNA-binding response regulator, OmpR family, contains REC and winged-helix (wHTH) domain	K T
COG0745	DNA-binding response regulator, OmpR family, contains REC and winged-helix (wHTH) domain	K T
COG0745	DNA-binding response regulator, OmpR family, contains REC and winged-helix (wHTH) domain	K T
COG0745	DNA-binding response regulator, OmpR family, contains REC and winged-helix (wHTH) domain	K T
COG0745	DNA-binding response regulator, OmpR family, contains REC and winged-helix (wHTH) domain	K T
COG0745	DNA-binding response regulator, OmpR family, contains REC and winged-helix (wHTH) domain	K T
COG0745	DNA-binding response regulator, OmpR family, contains REC and winged-helix (wHTH) domain	K T
COG0745	DNA-binding response regulator, OmpR family, contains REC and winged-helix (wHTH) domain	K T
COG0745	DNA-binding response regulator, OmpR family, contains REC and winged-helix (wHTH) domain	K T
COG0745	DNA-binding response regulator, OmpR family, contains REC and winged-helix (wHTH) domain	K T
COG0745	DNA-binding response regulator, OmpR family, contains REC and winged-helix (wHTH) domain	K T
COG0745	DNA-binding response regulator, OmpR family, contains REC and winged-helix (wHTH) domain	K T
COG0745	DNA-binding response regulator, OmpR family, contains REC and winged-helix (wHTH) domain	K T
COG0745	DNA-binding response regulator, OmpR family, contains REC and winged-helix (wHTH) domain	K T
COG0745	DNA-binding response regulator, OmpR family, contains REC and winged-helix (wHTH) domain	K T
COG0745	DNA-binding response regulator, OmpR family, contains REC and winged-helix (wHTH) domain	K T
COG0745	DNA-binding response regulator, OmpR family, contains REC and winged-helix (wHTH) domain	K T
COG0745	DNA-binding response regulator, OmpR family, contains REC and winged-helix (wHTH) domain	K T
COG0745	DNA-binding response regulator, OmpR family, contains REC and winged-helix (wHTH) domain	K T
COG0745	DNA-binding response regulator, OmpR family, contains REC and winged-helix (wHTH) domain	K T
COG0745	DNA-binding response regulator, OmpR family, contains REC and winged-helix (wHTH) domain	K T
COG0745	DNA-binding response regulator, OmpR family, contains REC and winged-helix (wHTH) domain	K T
COG0745	DNA-binding response regulator, OmpR family, contains REC and winged-helix (wHTH) domain	K T
COG0745	DNA-binding response regulator, OmpR family, contains REC and winged-helix (wHTH) domain	K T
COG0745	DNA-binding response regulator, OmpR family, contains REC and winged-helix (wHTH) domain	K T
COG0745	DNA-binding response regulator, OmpR family, contains REC and winged-helix (wHTH) domain	K T
COG0745	DNA-binding response regulator, OmpR family, contains REC and winged-helix (wHTH) domain	K T
COG0745	DNA-binding response regulator, OmpR family, contains REC and winged-helix (wHTH) domain	K T
COG0745	DNA-binding response regulator, OmpR family, contains REC and winged-helix (wHTH) domain	K T
COG0745	DNA-binding response regulator, OmpR family, contains REC and winged-helix (wHTH) domain	K T
COG0745	DNA-binding response regulator, OmpR family, contains REC and winged-helix (wHTH) domain	K T
COG0745	DNA-binding response regulator, OmpR family, contains REC and winged-helix (wHTH) domain	K T
COG0745	DNA-binding response regulator, OmpR family, contains REC and winged-helix (wHTH) domain	K T
COG0745	DNA-binding response regulator, OmpR family, contains REC and winged-helix (wHTH) domain	K T
COG0745	DNA-binding response regulator, OmpR family, contains REC and winged-helix (wHTH) domain	K T
COG0745	DNA-binding response regulator, OmpR family, contains REC and winged-helix (wHTH) domain	K T
COG0745	DNA-binding response regulator, OmpR family, contains REC and winged-helix (wHTH) domain	K T
COG0745	DNA-binding response regulator, OmpR family, contains REC and winged-helix (wHTH) domain	K T
COG0746	Molybdopterin-guanine dinucleotide biosynthesis protein A	H
COG0747	ABC-type transport system, periplasmic component	E
COG0747	ABC-type transport system, periplasmic component	E
COG0747	ABC-type transport system, periplasmic component	E
COG0747	ABC-type transport system, periplasmic component	E
COG0747	ABC-type transport system, periplasmic component	E
COG0747	ABC-type transport system, periplasmic component	E
COG0747	ABC-type transport system, periplasmic component	E
COG0747	ABC-type transport system, periplasmic component	E
COG0747	ABC-type transport system, periplasmic component	E
COG0747	ABC-type transport system, periplasmic component	E
COG0747	ABC-type transport system, periplasmic component	E
COG0750	Membrane-associated protease RseP, regulator of RpoE activity	K O
COG0750	Membrane-associated protease RseP, regulator of RpoE activity	K O
COG0751	Glycyl-tRNA synthetase, beta subunit	J
COG0752	Glycyl-tRNA synthetase, alpha subunit	J
COG0753	Catalase	P
COG0753	Catalase	P
COG0753	Catalase	P
COG0754	Glutathionylspermidine synthase	E
COG0755	ABC-type transport system involved in cytochrome c biogenesis, permease component	O
COG0755	ABC-type transport system involved in cytochrome c biogenesis, permease component	O
COG0755	ABC-type transport system involved in cytochrome c biogenesis, permease component	O
COG0755	ABC-type transport system involved in cytochrome c biogenesis, permease component	O
COG0756	dUTPase	V F
COG0757	3-dehydroquinate dehydratase	E
COG0758	Predicted Rossmann fold nucleotide-binding protein DprA/Smf involved in DNA uptake	L
COG0759	Membrane-anchored protein YidD, putatitve component of membrane protein insertase Oxa1/YidC/SpoIIIJ	M
COG0760	Parvulin-like peptidyl-prolyl isomerase	O
COG0760	Parvulin-like peptidyl-prolyl isomerase	O
COG0761	4-Hydroxy-3-methylbut-2-enyl diphosphate reductase IspH	I
COG0762	Uncharacterized conserved protein YggT, Ycf19 family	O
COG0764	3-hydroxymyristoyl/3-hydroxydecanoyl-(acyl carrier protein) dehydratase	I
COG0764	3-hydroxymyristoyl/3-hydroxydecanoyl-(acyl carrier protein) dehydratase	I
COG0765	ABC-type amino acid transport system, permease component	E
COG0765	ABC-type amino acid transport system, permease component	E
COG0765	ABC-type amino acid transport system, permease component	E
COG0765	ABC-type amino acid transport system, permease component	E
COG0765	ABC-type amino acid transport system, permease component	E
COG0765	ABC-type amino acid transport system, permease component	E
COG0765	ABC-type amino acid transport system, permease component	E
COG0765	ABC-type amino acid transport system, permease component<<>>COG0834	E
COG0765	ABC-type amino acid transport system, permease component	E
COG0765	ABC-type amino acid transport system, permease component	E
COG0765	ABC-type amino acid transport system, permease component	E
COG0766	UDP-N-acetylglucosamine enolpyruvyl transferase	M
COG0766	UDP-N-acetylglucosamine enolpyruvyl transferase	M
COG0766	UDP-N-acetylglucosamine enolpyruvyl transferase	M
COG0768	Cell division protein FtsI/penicillin-binding protein 2	D M
COG0768	Cell division protein FtsI/penicillin-binding protein 2	D M
COG0768	Cell division protein FtsI/penicillin-binding protein 2	D M
COG0768	Cell division protein FtsI/penicillin-binding protein 2	D M
COG0768	Cell division protein FtsI/penicillin-binding protein 2	D M
COG0768	Cell division protein FtsI/penicillin-binding protein 2	D M
COG0769	UDP-N-acetylmuramyl tripeptide synthase	M
COG0770	UDP-N-acetylmuramyl pentapeptide synthase	M
COG0771	UDP-N-acetylmuramoylalanine-D-glutamate ligase	M
COG0772	Bacterial cell division protein FtsW, lipid II flippase	D
COG0772	Bacterial cell division protein FtsW, lipid II flippase	D
COG0772	Bacterial cell division protein FtsW, lipid II flippase	D
COG0772	Bacterial cell division protein FtsW, lipid II flippase	D
COG0772	Bacterial cell division protein FtsW, lipid II flippase	D
COG0773	UDP-N-acetylmuramate-alanine ligase	M
COG0775	Nucleoside phosphorylase	F H
COG0775	Nucleoside phosphorylase	F H
COG0776	Bacterial nucleoid DNA-binding protein	L
COG0776	Bacterial nucleoid DNA-binding protein	L
COG0776	Bacterial nucleoid DNA-binding protein	L
COG0777	Acetyl-CoA carboxylase beta subunit	I
COG0777	Acetyl-CoA carboxylase beta subunit	I
COG0778	Nitroreductase	C
COG0778	Nitroreductase	C
COG0778	Nitroreductase	C
COG0778	Nitroreductase	C
COG0778	Nitroreductase	C
COG0778	Nitroreductase	C
COG0778	Nitroreductase	C
COG0778	Nitroreductase	C
COG0779	Ribosome maturation factor RimP	J
COG0779	Ribosome maturation factor RimP	J
COG0780	NADPH-dependent 7-cyano-7-deazaguanine reductase QueF, C-terminal domain, T-fold superfamily	J
COG0781	Transcription termination factor NusB	K
COG0782	Transcription elongation factor, GreA/GreB family	K
COG0782	Transcription elongation factor, GreA/GreB family	K
COG0782	Transcription elongation factor, GreA/GreB family	K
COG0783	DNA-binding ferritin-like protein (oxidative damage protectant)	V P
COG0783	DNA-binding ferritin-like protein (oxidative damage protectant)	V P
COG0783	DNA-binding ferritin-like protein (oxidative damage protectant)	V P
COG0784	CheY chemotaxis protein or a CheY-like REC (receiver) domain<<>>COG2198	T
COG0784	CheY chemotaxis protein or a CheY-like REC (receiver) domain	T
COG0784	CheY chemotaxis protein or a CheY-like REC (receiver) domain	T
COG0785	Cytochrome c biogenesis protein CcdA	O C
COG0785	Cytochrome c biogenesis protein CcdA	O C
COG0785	Cytochrome c biogenesis protein CcdA	O C
COG0785	Cytochrome c biogenesis protein CcdA	O C
COG0785	Cytochrome c biogenesis protein CcdA	O C
COG0785	Cytochrome c biogenesis protein CcdA	O C
COG0785	Cytochrome c biogenesis protein CcdA	O C
COG0785	Cytochrome c biogenesis protein CcdA	O C
COG0785	Cytochrome c biogenesis protein CcdA	O C
COG0787	Alanine racemase	M
COG0788	Formyltetrahydrofolate hydrolase	F
COG0789	DNA-binding transcriptional regulator, MerR family	K
COG0789	DNA-binding transcriptional regulator, MerR family	K
COG0789	DNA-binding transcriptional regulator, MerR family	K
COG0789	DNA-binding transcriptional regulator, MerR family	K
COG0789	DNA-binding transcriptional regulator, MerR family	K
COG0789	DNA-binding transcriptional regulator, MerR family	K
COG0789	DNA-binding transcriptional regulator, MerR family	K
COG0789	DNA-binding transcriptional regulator, MerR family	K
COG0789	DNA-binding transcriptional regulator, MerR family	K
COG0789	DNA-binding transcriptional regulator, MerR family	K
COG0789	DNA-binding transcriptional regulator, MerR family	K
COG0789	DNA-binding transcriptional regulator, MerR family	K
COG0789	DNA-binding transcriptional regulator, MerR family	K
COG0789	DNA-binding transcriptional regulator, MerR family	K
COG0789	DNA-binding transcriptional regulator, MerR family	K
COG0789	DNA-binding transcriptional regulator, MerR family	K
COG0789	DNA-binding transcriptional regulator, MerR family	K
COG0789	DNA-binding transcriptional regulator, MerR family	K
COG0789	DNA-binding transcriptional regulator, MerR family	K
COG0789	DNA-binding transcriptional regulator, MerR family	K
COG0789	DNA-binding transcriptional regulator, MerR family	K
COG0791	Cell wall-associated hydrolase, NlpC family	M
COG0791	Cell wall-associated hydrolase, NlpC family	M
COG0791	Cell wall-associated hydrolase, NlpC family	M
COG0791	Cell wall-associated hydrolase, NlpC family	M
COG0792	Predicted endonuclease distantly related to archaeal Holliday junction resolvase	L
COG0793	C-terminal processing protease CtpA/Prc, contains a PDZ domain	O
COG0794	D-arabinose 5-phosphate isomerase GutQ	M G
COG0796	Glutamate racemase	M
COG0796	Glutamate racemase	M
COG0798	Arsenite efflux pump ArsB, ACR3 family	P
COG0799	Ribosomal silencing factor RsfS, regulates association of 30S and 50S subunits	J
COG0800	2-keto-3-deoxy-6-phosphogluconate aldolase	G
COG0800	2-keto-3-deoxy-6-phosphogluconate aldolase	G
COG0800	2-keto-3-deoxy-6-phosphogluconate aldolase	G
COG0801	7,8-dihydro-6-hydroxymethylpterin-pyrophosphokinase	H
COG0802	tRNA A37 threonylcarbamoyladenosine biosynthesis protein TsaE	J
COG0803	ABC-type Zn uptake system ZnuABC, Zn-binding component ZnuA	P
COG0803	ABC-type Zn uptake system ZnuABC, Zn-binding component ZnuA	P
COG0803	ABC-type Zn uptake system ZnuABC, Zn-binding component ZnuA	P
COG0804	Urease alpha subunit	E
COG0805	Sec-independent protein secretion pathway component TatC	U
COG0806	Ribosomal 30S subunit maturation factor RimM, required for 16S rRNA processing	J
COG0807	GTP cyclohydrolase II<<>>COG0108	H
COG0807	GTP cyclohydrolase II	H
COG0809	S-adenosylmethionine:tRNA-ribosyltransferase-isomerase (queuine synthetase)	J
COG0812	UDP-N-acetylenolpyruvoylglucosamine reductase	M
COG0812	UDP-N-acetylenolpyruvoylglucosamine reductase	M
COG0813	Purine-nucleoside phosphorylase	F
COG0816	RNase H-fold protein, predicted Holliday junction resolvase in Firmicutes and mycoplasms, involved in anti-termination at Rho-dependent terminators	J K L
COG0817	Holliday junction resolvasome RuvABC endonuclease subunit	L
COG0817	Holliday junction resolvasome RuvABC endonuclease subunit	L
COG0818	Diacylglycerol kinase	I
COG0819	Thiaminase	H
COG0820	Adenine C2-methylase RlmN of 23S rRNA A2503 and tRNA A37	J
COG0820	Adenine C2-methylase RlmN of 23S rRNA A2503 and tRNA A37	J
COG0821	4-hydroxy-3-methylbut-2-en-1-yl diphosphate synthase IspG/GcpE	I
COG0822	NifU homolog involved in Fe-S cluster formation	O
COG0823	Periplasmic component of the Tol biopolymer transport system	U
COG0824	Acyl-CoA thioesterase FadM	I
COG0825	Acetyl-CoA carboxylase alpha subunit	I
COG0826	Collagenase-like protease, PrtC family	J
COG0826	Collagenase-like protease, PrtC family	J
COG0826	Collagenase-like protease, PrtC family	J
COG0828	Ribosomal protein S21	J
COG0829	Urease accessory protein UreH	O
COG0830	Urease accessory protein UreF	O
COG0830	Urease accessory protein UreF	O
COG0831	Urease gamma subunit	E
COG0832	Urease beta subunit	E
COG0833	Amino acid permease	E
COG0833	Amino acid permease	E
COG0834	ABC-type amino acid transport/signal transduction system, periplasmic component/domain	T E
COG0834	ABC-type amino acid transport/signal transduction system, periplasmic component/domain	T E
COG0834	ABC-type amino acid transport/signal transduction system, periplasmic component/domain	T E
COG0834	ABC-type amino acid transport/signal transduction system, periplasmic component/domain	T E
COG0834	ABC-type amino acid transport/signal transduction system, periplasmic component/domain	T E
COG0834	ABC-type amino acid transport/signal transduction system, periplasmic component/domain	T E
COG0834	ABC-type amino acid transport/signal transduction system, periplasmic component/domain	T E
COG0834	ABC-type amino acid transport/signal transduction system, periplasmic component/domain	T E
COG0835	Chemotaxis signal transduction protein	T
COG0835	Chemotaxis signal transduction protein	T
COG0835	Chemotaxis signal transduction protein	T
COG0836	Mannose-1-phosphate guanylyltransferase<<>>COG0662	M
COG0836	Mannose-1-phosphate guanylyltransferase<<>>COG0662	M
COG0839	NADH:ubiquinone oxidoreductase subunit 6 (chain J)	C
COG0840	Methyl-accepting chemotaxis protein	T
COG0840	Methyl-accepting chemotaxis protein	T
COG0840	Methyl-accepting chemotaxis protein	T
COG0840	Methyl-accepting chemotaxis protein	T
COG0840	Methyl-accepting chemotaxis protein	T
COG0840	Methyl-accepting chemotaxis protein	T
COG0840	Methyl-accepting chemotaxis protein	T
COG0840	Methyl-accepting chemotaxis protein	T
COG0840	Methyl-accepting chemotaxis protein	T
COG0840	Methyl-accepting chemotaxis protein	T
COG0840	Methyl-accepting chemotaxis protein	T
COG0840	Methyl-accepting chemotaxis protein	T
COG0840	Methyl-accepting chemotaxis protein	T
COG0840	Methyl-accepting chemotaxis protein	T
COG0840	Methyl-accepting chemotaxis protein	T
COG0840	Methyl-accepting chemotaxis protein	T
COG0840	Methyl-accepting chemotaxis protein	T
COG0840	Methyl-accepting chemotaxis protein	T
COG0840	Methyl-accepting chemotaxis protein	T
COG0840	Methyl-accepting chemotaxis protein	T
COG0840	Methyl-accepting chemotaxis protein	T
COG0840	Methyl-accepting chemotaxis protein	T
COG0840	Methyl-accepting chemotaxis protein	T
COG0840	Methyl-accepting chemotaxis protein	T
COG0840	Methyl-accepting chemotaxis protein	T
COG0840	Methyl-accepting chemotaxis protein	T
COG0840	Methyl-accepting chemotaxis protein	T
COG0840	Methyl-accepting chemotaxis protein	T
COG0840	Methyl-accepting chemotaxis protein	T
COG0841	Multidrug efflux pump subunit AcrB	V
COG0842	ABC-type multidrug transport system, permease component	V
COG0842	ABC-type multidrug transport system, permease component	V
COG0842	ABC-type multidrug transport system, permease component	V
COG0843	Heme/copper-type cytochrome/quinol oxidase, subunit 1	C
COG0843	Heme/copper-type cytochrome/quinol oxidase, subunit 1	C
COG0843	Heme/copper-type cytochrome/quinol oxidase, subunit 1	C
COG0843	Heme/copper-type cytochrome/quinol oxidase, subunit 1	C
COG0843	Heme/copper-type cytochrome/quinol oxidase, subunit 1	C
COG0843	Heme/copper-type cytochrome/quinol oxidase, subunit 1	C
COG0845	Multidrug efflux pump subunit AcrA (membrane-fusion protein)	V M
COG0845	Multidrug efflux pump subunit AcrA (membrane-fusion protein)	V M
COG0845	Multidrug efflux pump subunit AcrA (membrane-fusion protein)	V M
COG0846	NAD-dependent protein deacetylase, SIR2 family	O
COG0847	DNA polymerase III, epsilon subunit or related 3'-5' exonuclease<<>>COG1199	L
COG0848	Biopolymer transport protein ExbD	U
COG0848	Biopolymer transport protein ExbD	U
COG0849	Cell division ATPase FtsA	D
COG0850	Septum formation inhibitor MinC	D
COG0853	Aspartate 1-decarboxylase	H
COG0855	Polyphosphate kinase	P
COG0856	Orotate phosphoribosyltransferase homolog	F
COG0858	Ribosome-binding factor A	J
COG0860	N-acetylmuramoyl-L-alanine amidase	M
COG0860	N-acetylmuramoyl-L-alanine amidase	M
COG0860	N-acetylmuramoyl-L-alanine amidase	M
COG0860	N-acetylmuramoyl-L-alanine amidase	M
COG0860	N-acetylmuramoyl-L-alanine amidase	M
COG0861	Membrane protein TerC, possibly involved in tellurium resistance	P
COG0861	Membrane protein TerC, possibly involved in tellurium resistance	P
COG0861	Membrane protein TerC, possibly involved in tellurium resistance	P
COG0864	Metal-responsive transcriptional regulator, contains CopG/Arc/MetJ DNA-binding domain	K
COG0864	Metal-responsive transcriptional regulator, contains CopG/Arc/MetJ DNA-binding domain	K
COG1001	Adenine deaminase	F
COG1001	Adenine deaminase	F
COG1003	Glycine cleavage system protein P (pyridoxal-binding), C-terminal domain	E
COG1004	UDP-glucose 6-dehydrogenase	M
COG1006	Multisubunit Na+/H+ antiporter, MnhC subunit	P
COG1009	NADH:ubiquinone oxidoreductase subunit 5 (chain L)/Multisubunit Na+/H+ antiporter, MnhA subunit	C
COG1010	Precorrin-3B methylase	H
COG1011	FMN phosphatase YigB, HAD superfamily	H
COG1011	FMN phosphatase YigB, HAD superfamily	H
COG1011	FMN phosphatase YigB, HAD superfamily	H
COG1011	FMN phosphatase YigB, HAD superfamily	H
COG1011	FMN phosphatase YigB, HAD superfamily	H
COG1011	FMN phosphatase YigB, HAD superfamily	H
COG1012	Acyl-CoA reductase or other NAD-dependent aldehyde dehydrogenase	I
COG1012	Acyl-CoA reductase or other NAD-dependent aldehyde dehydrogenase	I
COG1012	Acyl-CoA reductase or other NAD-dependent aldehyde dehydrogenase	I
COG1012	Acyl-CoA reductase or other NAD-dependent aldehyde dehydrogenase	I
COG1012	Acyl-CoA reductase or other NAD-dependent aldehyde dehydrogenase	I
COG1012	Acyl-CoA reductase or other NAD-dependent aldehyde dehydrogenase	I
COG1012	Acyl-CoA reductase or other NAD-dependent aldehyde dehydrogenase	I
COG1012	Acyl-CoA reductase or other NAD-dependent aldehyde dehydrogenase	I
COG1012	Acyl-CoA reductase or other NAD-dependent aldehyde dehydrogenase	I
COG1015	Phosphopentomutase	G
COG1015	Phosphopentomutase	G
COG1018	Ferredoxin-NADP reductase<<>>COG1017	C
COG1020	Non-ribosomal peptide synthetase component F<<>>COG3321	Q
COG1020	Non-ribosomal peptide synthetase component F	Q
COG1023	6-phosphogluconate dehydrogenase (decarboxylating)	G
COG1026	Zn-dependent peptidase, M16 (insulinase) family	O
COG1027	Aspartate ammonia-lyase	E
COG1028	NAD(P)-dependent dehydrogenase, short-chain alcohol dehydrogenase family	I
COG1028	NAD(P)-dependent dehydrogenase, short-chain alcohol dehydrogenase family	I
COG1028	NAD(P)-dependent dehydrogenase, short-chain alcohol dehydrogenase family	I
COG1028	NAD(P)-dependent dehydrogenase, short-chain alcohol dehydrogenase family	I
COG1028	NAD(P)-dependent dehydrogenase, short-chain alcohol dehydrogenase family	I
COG1028	NAD(P)-dependent dehydrogenase, short-chain alcohol dehydrogenase family	I
COG1028	NAD(P)-dependent dehydrogenase, short-chain alcohol dehydrogenase family	I
COG1028	NAD(P)-dependent dehydrogenase, short-chain alcohol dehydrogenase family	I
COG1028	NAD(P)-dependent dehydrogenase, short-chain alcohol dehydrogenase family	I
COG1028	NAD(P)-dependent dehydrogenase, short-chain alcohol dehydrogenase family	I
COG1028	NAD(P)-dependent dehydrogenase, short-chain alcohol dehydrogenase family	I
COG1028	NAD(P)-dependent dehydrogenase, short-chain alcohol dehydrogenase family	I
COG1028	NAD(P)-dependent dehydrogenase, short-chain alcohol dehydrogenase family	I
COG1028	NAD(P)-dependent dehydrogenase, short-chain alcohol dehydrogenase family	I
COG1028	NAD(P)-dependent dehydrogenase, short-chain alcohol dehydrogenase family	I
COG1028	NAD(P)-dependent dehydrogenase, short-chain alcohol dehydrogenase family	I
COG1028	NAD(P)-dependent dehydrogenase, short-chain alcohol dehydrogenase family	I
COG1028	NAD(P)-dependent dehydrogenase, short-chain alcohol dehydrogenase family	I
COG1028	NAD(P)-dependent dehydrogenase, short-chain alcohol dehydrogenase family	I
COG1028	NAD(P)-dependent dehydrogenase, short-chain alcohol dehydrogenase family	I
COG1028	NAD(P)-dependent dehydrogenase, short-chain alcohol dehydrogenase family	I
COG1028	NAD(P)-dependent dehydrogenase, short-chain alcohol dehydrogenase family	I
COG1028	NAD(P)-dependent dehydrogenase, short-chain alcohol dehydrogenase family	I
COG1028	NAD(P)-dependent dehydrogenase, short-chain alcohol dehydrogenase family	I
COG1028	NAD(P)-dependent dehydrogenase, short-chain alcohol dehydrogenase family	I
COG1028	NAD(P)-dependent dehydrogenase, short-chain alcohol dehydrogenase family	I
COG1028	NAD(P)-dependent dehydrogenase, short-chain alcohol dehydrogenase family	I
COG1028	NAD(P)-dependent dehydrogenase, short-chain alcohol dehydrogenase family	I
COG1028	NAD(P)-dependent dehydrogenase, short-chain alcohol dehydrogenase family<<>>COG3347	I
COG1028	NAD(P)-dependent dehydrogenase, short-chain alcohol dehydrogenase family	I
COG1028	NAD(P)-dependent dehydrogenase, short-chain alcohol dehydrogenase family	I
COG1028	NAD(P)-dependent dehydrogenase, short-chain alcohol dehydrogenase family	I
COG1028	NAD(P)-dependent dehydrogenase, short-chain alcohol dehydrogenase family	I
COG1028	NAD(P)-dependent dehydrogenase, short-chain alcohol dehydrogenase family	I
COG1028	NAD(P)-dependent dehydrogenase, short-chain alcohol dehydrogenase family	I
[truncated: 2,875 more rows]

## Sheet: COG category counts
Category Code	Number of genes in category			*mulitple letters indicate genes falling into multiple COG categories
A	1
C	178
C E	1
C H	3
C I R	1
C P	3
C R	8
D	43
D E	1
D H	6
D I	10
D M	8
D N	5
D P	2
D R	1
D T M	2
D Z	6
E	265
E F	3
E H	11
E P	34
E Q	2
E R	12
F	110
F H	2
F P	3
F R	15
G	564
G E	8
G E P R	57
G E R	12
G H	2
G I	1
H	184
H I	3
H P	5
H R	59
I	154
I Q	5
I R	3
J	269
J E	1
J E H Q	4
J H	1
J K	1
J K L	1
J O	39
J O H	1
J R	2
J V	2
K	478
K D	1
K E	14
K G	15
K L	8
K N	1
K O	2
K R	32
K T	128
K T N	1
K V	5
K X	3
L	132
L D	1
L X	2
M	219
M E	1
M F	1
M G	17
M O	3
M R	5
M U	2
N	47
N U	6
N W	2
O	145
O C	27
O E	1
O H	2
O P	2
P	232
P Q	2
P R	7
Q	74
Q R	16
R	335
S	218
T	277
T E	8
T F	4
T G	5
T H	1
T O	1
T P	5
T Q	2
T R	1
U	26
V	165
V F	10
V H	1
V I	4
V M	3
V P	3
V Q	6
V T	1
W U	5
X	42
Z	3

## Sheet: Cog Category Legend
COG Category Code	Category Type
J	Translation, ribosomal structure and biogenesis
A	RNA Processing and Modification
K	Transcription
L	Replication, Recombination and Repair
B	Chromatin Structure and Dynamics
D	CELL CYCLE CONTROL, CELL DIVISION, CHROMOSOME PARTITIONING
Y	NUCLEAR STRUCTURE
V	DEFENSE MECHANISMS
T	SIGNAL TRANSDUCTION MECHANISMS
M	CELL WALL/MEMBRANE/ENVELOPE BIOGENESIS
N	CELL MOTILITY
Z	CYTOSKELETON
W	EXTRACELLULAR STRUCTURES
U	INTRACELLULAR TRAFFICKING, SECRETION, AND VESICULAR TRANSPORT
O	POSTTRANSLATIONAL MODIFICATION, PROTEIN TURNOVER, CHAPERONES
X	Mobilome: prophages, transposons
C	ENERGY PRODUCTION AND CONVERSION
G	CARBOHYDRATE TRANSPORT AND METABOLISM
E	AMINO ACID TRANSPORT AND METABOLISM
F	NUCLEOTIDE TRANSPORT AND METABOLISM
H	COENZYME TRANSPORT AND METABOLISM
I	LIPID TRANSPORT AND METABOLISM
P	INORGANIC ION TRANSPORT AND METABOLISM
Q	SECONDARY METABOLITES BIOSYNTHESIS, TRANSPORT AND CATABOLISM
R	GENERAL FUNCTION PREDICTION ONLY
S	FUNCTION UNKNOWN
